# Supplementary material for: Returning a lost process by reintroducing a locally extinct digging marsupial
Source: PeerJ. 2019 May 27;7:e6622. doi: 10.7717/peerj.6622 (PMC6542348; doi:10.7717/peerj.6622)
Supplement: Supplemental Information 3 — Data for bettong dig project presented as four worksheets on dig counts for large and small plots, soil volume and mass data, and data on the number of digs per species. [file peerj-07-6622-s003.xlsx]

## Sheet: big plot counts
Reserve	Polygon	Site	Poly pair	Log_treat	Log_dispersed	Log_clumped	Bettong_excl	Roo_excl	Digs prior	Pebbles retrived	Digs new	Bettong digs	Rabbit digs	Bird digs	Uknown digs	Other digs	Season	Bettong population	Tree density	Shrub density	NatLogVol	BA Euc	BA Acacia	Stems Euc	Stems Acacia	US group	Nitrate	Carbon	Nitrogen	Avail P
GO	GO72A	GO72A-1	1	none	N	N	Gooroo	high_roos	55.3571	39.2857	7.14286	0	0	3.57143	3.57143	0	3	190	high	low	6.027	99111.9	192	1122	8	2	0.4	1.9	0.1	4
GO	GO72A	GO72A-4	1	both	Y	Y	Gooroo	high_roos	112.5	67.8571	8.92857	0	0	8.92857	0	0	1	136	low	low	9.656	111956	622.8	200	19	3	0.5	3.4	0.2	8
GO	WG108	WG108-1	3	both	Y	Y	Gooroo	low_roos	70	51.6667	36.6667	0	11.6667	0	25	0	3	175	low	low	2.838	89810.3	0	254	0	1	9.8	2.8	0.2	11
GO	WG108	WG108-2	3	none	N	N	Gooroo	low_roos	46.6667	36.6667	25	0	0	11.6667	10	3.33333	3	175	low	low	0.717	44368.1	0	184	0	1	5.8	2.3	0.1	9
GO	WG109	WG109-2	3	both	Y	Y	Gooroo	low_roos	30.3571	23.2143	16.0714	0	16.0714	0	0	0	1	125	low	low	8.903	107604	0	279	0	1	9	3.6	0.2	13
GO	WG109	WG109-3	3	clumped	N	Y	Gooroo	low_roos	67.3077	38.4615	28.8462	0	0	0	28.8462	0	3	175	low	low	10.091	80245.3	0	90	0	1	2.9	3	0.2	10
GO	WG109	WG109-4	3	none	N	N	Gooroo	low_roos	35.7143	28.5714	0	0	0	0	0	0	1	152	low	low	18.092	34982.5	314.2	7	1	1	11	4.7	0.3	23
GO	WG148	WG148-1	6	none	N	N	Gooroo	high_roos	60.7143	33.9286	19.6429	0	19.6429	0	0	0	2	165	low	low	10.433	65885.4	116.2	242	2	2	1.4	2.9	0.2	9
GO	WG148	WG148-3	6	both	Y	Y	Gooroo	high_roos	17.8571	14.2857	5.35714	0	0	1.78571	3.57143	0	1	130	low	low	3.313	14814.4	0	46	0	2	3.3	2.3	0.1	8
GO	WG150A	WG150A-1	4	both	Y	Y	Gooroo	high_roos	26.7857	16.0714	3.57143	0	0	0	3.57143	0	3	191	low	low	4.005	43563.4	0	119	0	6	1.6	2.3	0.1	5
GO	WG150A	WG150A-4	4	none	N	N	Gooroo	high_roos	30.3571	12.5	5.35714	0	0	0	5.35714	0	3	191	high	low	1.726	72009.2	0	795	0	6	3.9	2.6	0.2	12
GO	WG152	WG152-3	4	both	Y	Y	Gooroo	high_roos	75	46.4286	0	0	0	0	0	0	3	190	low	low	0.231	11942.6	0	50	0	6	5.2	1.9	0.1	7
GO	WG63	WG63-2	2	both	Y	Y	Gooroo	low_roos	66.6667	51.6667	5	0	0	3.33333	1.66667	0	3	175	high	low	14.67	108436	19	465	2	2	1	2.2	0.1	6
GO	WG63	WG63-4	2	none	N	N	Gooroo	low_roos	253.571	117.857	23.2143	0	0	12.5	10.7143	0	1	152	high	low	4.76	116882	0	539	0	2	0.2	2.6	0.1	7
GO	WG63A	WG63A-1	5	both	Y	Y	Gooroo	low_roos	392.857	307.143	3.57143	0	3.57143	0	0	0	1	152	low	low	2.264	9869.6	0	1	0	2	0.4	1.7	0.1	5
GO	WG63A	WG63A-2	5	none	N	N	Gooroo	low_roos	50	33.9286	0	0	0	0	0	0	3	190	low	low	0.473	13881.1	0	147	0	2	0.2	1.8	0.1	5
GO	WG63A	WG63A-3	5	none	N	N	Gooroo	low_roos	53.5714	26.7857	0	0	0	0	0	0	3	190	low	low	0.058	13517.5	8.1	145	2	2	0.2	1.8	0.1	3
GO	WG63A	WG63A-4	5	both	Y	Y	Gooroo	low_roos	96.4286	64.2857	0	0	0	0	0	0	1	152	low	low	5.484	19539.6	0	143	0	4	0.4	2.3	0.1	5
GO	WG76	WG76-2	1	both	Y	Y	Gooroo	high_roos	26.7857	17.8571	60.7143	0	0	39.2857	16.0714	5.35714	1	125	high	low	26.241	104119	0	592	0	4	0.5	2.3	0.1	5
GO	WG76	WG76-4	1	none	N	N	Gooroo	high_roos	342.308	267.308	36.5385	0	0	19.2308	17.3077	0	3	175	high	low	11.447	98205.9	774	1319	14	2	2.4	2.8	0.2	6
GO	WG81	WG81-3	2	none	N	N	Gooroo	low_roos	130.357	23.2143	1.78571	0	0	0	1.78571	0	3	190	high	low	6.366	93200.5	197.9	436	7	2	0.3	2.4	0.1	3
GO	WG81	WG81-4	2	both	Y	Y	Gooroo	low_roos	201.786	128.571	0	0	0	0	0	0	1	136	avg	low	7.686	88112.9	12	342	2	2	0.2	2	0.1	3
GO	WG92	WG92-2	6	none	N	N	Gooroo	high_roos	73.2143	57.1429	16.0714	0	3.57143	8.92857	3.57143	0	1	130	low	low	1.066	21637.5	0	81	0	6	5.9	2.5	0.2	8
GO	WG92	WG92-4	6	both	Y	Y	Gooroo	high_roos	126.923	94.2308	13.4615	0	13.4615	0	0	0	2	159	low	low	1.762	51601.3	0	72	0	6	8	3.3	0.2	9
MF	MF11A	MF11A-1	11	none	N	N	bettongs	low_roos	723.214	569.643	550	535.714	0	0	10.7143	0	2	173	low	high	3.009	56231.8	511.3	189	16	4	1.6	3.1	0.2	16
MF	MF11A	MF11A-2	11	both	Y	Y	bettongs	low_roos	160.714	110.714	37.5	30.3571	0	0	7.14286	0	2	173	low	high	1.559	63584.9	80.5	190	9	4	0.6	3.1	0.2	10
MF	MF11A	MF11A-3	11	dispersed	Y	N	no_bettongs	low_roos	85.7143	67.8571	0	0	0	0	0	0	2	153	low	high	3.27	52381	713.1	189	60	4	1.1	3.8	0.2	9
MF	MF11A	MF11A-4	11	clumped	N	Y	bettongs	low_roos	567.857	367.857	92.8571	58.9286	3.57143	10.7143	19.6429	0	3	185	low	high	2.227	66832.3	360.1	198	47	3	0.5	3.3	0.2	6
MF	MF16A	MF16A-1	11	clumped	N	Y	bettongs	low_roos	580.357	314.286	316.071	246.429	48.2143	14.2857	7.14286	0	1	137	low	high	6.149	2337.1	6562	36	308	2	0.7	3.1	0.2	10
MF	MF16A	MF16A-2	11	both	Y	Y	bettongs	low_roos	651.786	391.071	110.714	67.8571	3.57143	16.0714	23.2143	0	2	153	low	high	0.755	19011.4	2202.8	16	83	4	1	3.4	0.2	9
MF	MF16A	MF16A-3	11	dispersed	Y	N	bettongs	low_roos	805.357	189.286	235.714	101.786	110.714	10.7143	10.7143	1.78571	3	195	high	high	5.017	69379.1	5955.1	522	410	2	1.1	3.4	0.2	9
MF	MF16A	MF16A-4	11	none	N	N	no_bettongs	low_roos	51.7857	35.7143	7.14286	0	3.57143	0	3.57143	0	2	162	avg	high	11.582	70374.6	1574.9	405	79	2	1.3	3	0.2	8
MF	MF19A	MF19A-1	7	none	N	N	bettongs	high_roos	521.429	283.929	103.571	44.6429	28.5714	5.35714	25	0	2	165	high	avg	6.797	162609	380.1	1102	24	4	0.4	3.6	0.2	10
MF	MF19A	MF19A-2	7	both	Y	Y	bettongs	high_roos	405.357	132.143	100	64.2857	1.78571	0	33.9286	0	2	172	high	high	17.906	187971	1791.7	401	81	4	1.2	3.5	0.2	12
MF	MF19A	MF19A-3	7	clumped	N	Y	no_bettongs	high_roos	87.5	60.7143	26.7857	0	1.78571	0	25	0	1	145	high	high	23.976	182245	1408.8	879	117	4	0.4	3.3	0.2	11
MF	MF19A	MF19A-4	7	dispersed	Y	N	bettongs	high_roos	346.154	155.769	119.231	1.92308	17.3077	55.7692	42.3077	1.92308	1	121	high	avg	16.43	141382	194.4	856	37	2	1.2	2.9	0.2	5
MF	MF22A	MF22A-1	8	none	N	N	bettongs	low_roos	187.5	146.429	48.2143	39.2857	0	0	8.92857	0	2	165	low	avg	2.622	47672.2	972.7	254	28	3	1.6	2.2	0.1	7
MF	MF22A	MF22A-2	8	clumped	N	Y	bettongs	low_roos	1455.36	701.786	180.357	96.4286	41.0714	3.57143	37.5	1.78571	3	186	high	high	3.421	97072.5	1370.3	573	73	3	0.2	2.8	0.1	6
MF	MF22A	MF22A-3	8	dispersed	Y	N	no_bettongs	low_roos	150	114.286	35.7143	0	0	0	14.2857	21.4286	2	158	low	high	3.91	42917.9	1534.5	176	99	3	2.8	2.3	0.1	6
MF	MF22A	MF22A-4	8	both	Y	Y	bettongs	low_roos	387.5	125	72.9167	12.5	54.1667	4.16667	2.08333	0	3	185	low	avg	2.344	59737.4	345.6	254	19	3	0.2	2.2	0.1	6
MF	MF22AZ	MF22AZ-1	9	none	N	N	bettongs	low_roos	305.357	260.714	28.5714	3.57143	5.35714	14.2857	5.35714	0	1	146	avg	avg	0.826	58941.4	466.9	329	29	2	0.2	2.6	0.1	3
MF	MF22AZ	MF22AZ-2	9	both	Y	Y	no_bettongs	low_roos	155.769	132.692	32.6923	0	30.7692	1.92308	0	0	2	160	low	low	3.918	53220.3	6.3	125	2	3	0.2	2.1	0.1	6
MF	MF22AZ	MF22AZ-3	9	both	Y	Y	bettongs	low_roos	351.786	258.929	92.8571	5.35714	39.2857	8.92857	39.2857	0	2	156	low	avg	1.803	40069.7	597.3	295	22	3	0.2	2.6	0.1	3
MF	MF22AZ	MF22AZ-4	9	none	N	N	bettongs	low_roos	317.857	151.786	57.1429	50	3.57143	1.78571	1.78571	0	3	195	low	avg	0.526	33569.3	658.2	300	35	2	0.2	2.4	0.1	5
MF	MF25A	MF25A-1	7	none	N	N	no_bettongs	high_roos	310.714	169.643	89.2857	0	0	85.7143	3.57143	0	1	127	high	low	7.873	122104	108.4	909	15	2	0.2	2.5	0.1	3
MF	MF25A	MF25A-2	7	both	Y	Y	bettongs	high_roos	816.667	550	104.167	45.8333	16.6667	25	0	16.6667	2	160	high	low	8.15	127188	195.8	782	7	2	0.2	3.2	0.2	3
MF	MF25A	MF25A-3	7	dispersed	Y	N	bettongs	high_roos	539.286	376.786	141.071	0	0	66.0714	28.5714	46.4286	2	156	high	low	1.655	77810.3	0	552	0	2	0.2	2.2	0.1	3
MF	MF25A	MF25A-4	7	clumped	N	Y	bettongs	high_roos	532.692	350	59.6154	50	1.92308	0	7.69231	0	3	185	high	low	2.159	91983	68.1	796	4	2	0.2	2	0.1	5
MF	MF27A	MF27A-1	12	none	N	N	bettongs	high_roos	132.143	71.4286	1.78571	0	0	0	1.78571	0	2	172	low	low	2.344	26660.9	158.7	109	2	2	1.7	2	0.1	3
MF	MF27A	MF27A-2	12	dispersed	Y	N	bettongs	high_roos	121.429	100	50	28.5714	0	16.0714	5.35714	0	1	127	low	low	0.858	11045.8	31	187	4	5	0.8	1.5	0.1	3
MF	MF27A	MF27A-3	12	clumped	N	Y	bettongs	high_roos	230.357	162.5	14.2857	3.57143	7.14286	0	3.57143	0	1	137	low	low	0.255	20786	0	107	0	2	2.4	1.8	0.1	4
MF	MF27A	MF27A-4	12	both	Y	Y	no_bettongs	high_roos	75	63.4615	9.61538	0	1.92308	0	7.69231	0	2	161	low	low	2.336	27845.5	102.1	306	15	2	1.4	1.8	0.1	3
MF	MF32	MF32-1	12	dispersed	Y	N	bettongs	high_roos	805.357	630.357	125	73.2143	32.1429	5.35714	14.2857	0	3	178	low	low	5.033	73685	38.9	194	6	5	8.9	3.8	0.2	10
MF	MF32	MF32-2	12	clumped	N	Y	no_bettongs	high_roos	125	93.3333	66.6667	0	0	66.6667	0	0	1	128	low	low	6.498	75622.7	0	304	0	2	1.4	2.8	0.1	8
MF	MF32	MF32-3	12	both	Y	Y	bettongs	high_roos	407.143	262.5	35.7143	23.2143	1.78571	5.35714	5.35714	0	3	185	avg	low	0.373	52113.9	4.9	365	1	2	1.3	2.7	0.1	6
MF	MF32	MF32-4	12	none	N	N	bettongs	high_roos	960.714	276.786	48.2143	19.6429	23.2143	0	5.35714	0	3	195	avg	low	0.839	43221.6	18.8	382	3	3	1.9	2.4	0.1	7
MF	MF34	MF34-1	8	clumped	N	Y	bettongs	low_roos	194.643	108.929	91.0714	46.4286	19.6429	0	25	0	2	157	high	low	15.477	161022	0	463	0	4	0.5	3.8	0.2	7
MF	MF34	MF34-2	8	none	N	N	no_bettongs	low_roos	51.6667	21.6667	1.66667	0	1.66667	0	0	0	2	166	avg	low	10.477	119809	0	370	0	4	0.5	2.7	0.1	7
MF	MF34	MF34-3	8	dispersed	Y	N	bettongs	low_roos	214.286	98.2143	194.643	141.071	21.4286	0	32.1429	0	2	172	low	low	12.215	163893	500.7	231	11	2	1.5	3.4	0.2	10
MF	MF34	MF34-4	8	both	Y	Y	bettongs	low_roos	255.769	201.923	130.769	19.2308	76.9231	3.84615	19.2308	11.5385	2	161	low	avg	16.193	195877	1771.9	286	32	1	3.2	3.3	0.2	13
MF	MF37	MF37-1	10	none	N	N	bettongs	high_roos	157.143	123.214	19.6429	12.5	5.35714	0	0	1.78571	3	179	low	low	0.71	32125.5	0	163	0	2	1.3	3	0.2	9
MF	MF37	MF37-2	10	dispersed	Y	N	bettongs	high_roos	450	244.643	194.643	166.071	19.6429	0	8.92857	0	2	153	low	avg	0.571	47533.1	473.8	188	37	3	0.7	2.6	0.1	6
MF	MF37	MF37-3	10	both	Y	Y	no_bettongs	high_roos	73.2143	60.7143	1.78571	0	1.78571	0	0	0	2	158	low	low	1.463	71060.2	0	209	0	2	1.5	2.9	0.2	10
MF	MF37	MF37-4	10	clumped	N	Y	bettongs	high_roos	153.571	94.6429	48.2143	28.5714	14.2857	1.78571	3.57143	0	1	145	avg	low	1.101	54461.3	0	369	0	5	0.4	2.7	0.1	8
MF	MF38	MF38-1	10	dispersed	Y	N	bettongs	high_roos	401.786	269.643	58.9286	23.2143	16.0714	10.7143	7.14286	1.78571	2	161	high	low	8.588	137726	354.2	698	4	5	0.3	2.8	0.1	6
MF	MF38	MF38-2	10	clumped	N	Y	no_bettongs	high_roos	121.429	58.9286	1.78571	0	0	1.78571	0	0	2	173	high	low	12.89	144278	6.3	420	2	2	0.5	3.4	0.2	5
MF	MF38	MF38-3	10	both	Y	Y	bettongs	high_roos	496.429	278.571	114.286	80.3571	0	0	33.9286	0	1	146	high	low	6.34	133927	63.6	461	1	3	0.3	3.9	0.1	5
MF	MF38	MF38-4	10	none	N	N	bettongs	high_roos	385.714	191.071	128.571	94.6429	7.14286	3.57143	7.14286	16.0714	1	126	avg	low	6.781	144624	172.4	317	14	2	0.4	3	0.1	8
MF	MF9A	MF9A-1	9	dispersed	Y	N	bettongs	low_roos	339.286	187.5	103.571	48.2143	25	7.14286	23.2143	0	1	133	low	avg	2.63	64856.1	1101.3	313	49	4	0.5	2.5	0.2	8
MF	MF9A	MF9A-2	9	dispersed	Y	N	no_bettongs	low_roos	66.0714	57.1429	5.35714	0	0	3.57143	0	1.78571	2	165	low	low	2.221	54453.9	57.7	254	8	4	0.7	2.5	0.2	7
MF	MF9A	MF9A-3	9	clumped	N	Y	bettongs	low_roos	610.714	303.571	387.5	305.357	46.4286	0	35.7143	0	2	157	high	high	2.65	120546	4705.7	628	291	4	2.2	3.6	0.2	8
MF	MF9A	MF9A-4	9	clumped	N	Y	bettongs	low_roos	653.571	417.857	207.143	146.429	7.14286	3.57143	33.9286	0	3	179	low	avg	1.653	84752.4	747.5	328	26	2	4.5	4.5	0.3	11

## Sheet: soil vol and mass
Site number	Soil sample number	Number of new digs	Count bettong digs	Count rabbit digs	Bulk density	Grav water	Vol water	Porosity	Site plot code	Dig number	Animal	Shape	Length (cm)	Width (cm)	Depth (cm)	avg r (cm)	vol cone	vol dig (cm3)	mass (g)	surface area
WG76-2	813	12	0	0	1.14208	0.193531	0.221028	0.569026	WG76-2-BR	1	unknown	nose hole	2	1.5	1	0.875	0.801761	7.36299	8.40914	2.40528
WG76-2	813	12	0	0	1.14208	0.193531	0.221028	0.569026	WG76-2-BR	2	unknown	scratch	4	6	1.5	2.5	9.81748	22.6897	25.9135	19.635
WG76-2	813	12	0	0	1.14208	0.193531	0.221028	0.569026	WG76-2-BR	3	bird	nose hole	2	2	0.5	1	0.523599	6.89012	7.86908	3.14159
WG76-2	813	12	0	0	1.14208	0.193531	0.221028	0.569026	WG76-2-BR	4	bird	scratch	6	5	2	2.75	15.8389	32.9261	37.6043	23.7583
WG76-2	813	12	0	0	1.14208	0.193531	0.221028	0.569026	WG76-2-BR	5	bird	scratch	4	3	2	1.75	6.41409	16.9039	19.3057	9.62113
WG76-2	813	12	0	0	1.14208	0.193531	0.221028	0.569026	WG76-2-BR	6	bird	nose hole	2	1	2	0.75	1.1781	8.00277	9.13981	1.76715
WG76-2	813	12	0	0	1.14208	0.193531	0.221028	0.569026	WG76-2-BR	7	bird	nose hole	2.5	2	1.5	1.125	1.98804	9.37967	10.7123	3.97608
WG76-2	813	12	0	0	1.14208	0.193531	0.221028	0.569026	WG76-2-BR	8	bird	nose hole	5	3	3	2	12.5664	27.3628	31.2506	12.5664
WG76-2	813	12	0	0	1.14208	0.193531	0.221028	0.569026	WG76-2-BR	9	bird	scratch	3.5	3	1.5	1.625	4.14788	13.0514	14.9058	8.29577
WG76-2	813	12	0	0	1.14208	0.193531	0.221028	0.569026	WG76-2-BR	10	bird	nose hole	3	2	3.5	1.25	5.72686	15.7357	17.9714	4.90874
WG76-2	813	12	0	0	1.14208	0.193531	0.221028	0.569026	WG76-2-BR	11	bird	scratch	3.5	3	1	1.625	2.76526	10.7009	12.2213	8.29577
WG76-2	813	12	0	0	1.14208	0.193531	0.221028	0.569026	WG76-2-BR	12	bird	nose hole	2.5	2	2.5	1.125	3.3134	11.6328	13.2856	3.97608
WG76-4	1012	1	0	0	0.696071	0.598918	0.416889	0.737332	WG76-4-AL	1	bird	nose hole	4	3	3	1.75	9.62113	22.3559	15.5613	9.62113
WG76-4	1013	9	0	0	1.09525	0.12602	0.138024	0.586698	WG76-4-AR	1	unknown	scratch	18	6	1	6	37.6991	70.0885	76.7644	113.097
WG76-4	1013	9	0	0	1.09525	0.12602	0.138024	0.586698	WG76-4-AR	2	unknown	scratch	8	6	0.5	3.5	6.41409	16.9039	18.514	38.4845
WG76-4	1013	9	0	0	1.09525	0.12602	0.138024	0.586698	WG76-4-AR	3	bird	scratch	11	4	1	3.75	14.7262	31.0346	33.9906	44.1786
WG76-4	1013	9	0	0	1.09525	0.12602	0.138024	0.586698	WG76-4-AR	4	bird	scratch	8	4	1	3	9.42478	22.0221	24.1197	28.2743
WG76-4	1013	9	0	0	1.09525	0.12602	0.138024	0.586698	WG76-4-AR	5	bird	scratch	4	3	0.5	1.75	1.60352	8.72599	9.55714	9.62113
WG76-4	1013	9	0	0	1.09525	0.12602	0.138024	0.586698	WG76-4-AR	6	bird	scratch	10	5	0.5	3.75	7.36311	18.5173	20.2811	44.1786
WG76-4	1013	9	0	0	1.09525	0.12602	0.138024	0.586698	WG76-4-AR	7	bird	scratch	3	3	1	1.5	2.35619	10.0055	10.9586	7.06858
WG76-4	1013	9	0	0	1.09525	0.12602	0.138024	0.586698	WG76-4-AR	8	bird	scratch	6	4	0.5	2.5	3.27249	11.5632	12.6646	19.635
WG76-4	1013	9	0	0	1.09525	0.12602	0.138024	0.586698	WG76-4-AR	9	bird	nose hole	3	2	3	1.25	4.90874	14.3449	15.7112	4.90874
WG76-4	1015	4	0	0	1.02484	0.14463	0.148222	0.61327	WG76-4-BL	1	unknown	scratch	14	9	0.5	5.75	17.3115	35.4295	36.3095	103.869
WG76-4	1015	4	0	0	1.02484	0.14463	0.148222	0.61327	WG76-4-BL	2	unknown	bowl	7	6	2	3.25	22.122	43.6075	44.6905	33.1831
WG76-4	1015	4	0	0	1.02484	0.14463	0.148222	0.61327	WG76-4-BL	3	unknown	scratch	6	5	0.5	2.75	3.95972	12.7315	13.0477	23.7583
WG76-4	1015	4	0	0	1.02484	0.14463	0.148222	0.61327	WG76-4-BL	4	unknown	nose hole	3.5	2.5	1	1.5	2.35619	10.0055	10.254	7.06858
WG76-4	1014	5	0	0	0.573758	0.547448	0.314102	0.783488	WG76-4-BR	1	unknown	scratch	9	3	1	3	9.42478	22.0221	12.6354	28.2743
WG76-4	1014	5	0	0	0.573758	0.547448	0.314102	0.783488	WG76-4-BR	2	unknown	scratch	6	5	0.5	2.75	3.95972	12.7315	7.3048	23.7583
WG76-4	1014	5	0	0	0.573758	0.547448	0.314102	0.783488	WG76-4-BR	3	bird	scratch	5	3	1	2	4.18879	13.1209	7.52824	12.5664
WG76-4	1014	5	0	0	0.573758	0.547448	0.314102	0.783488	WG76-4-BR	4	bird	nose hole	2	1.5	4	0.875	3.20704	11.452	6.57065	2.40528
WG76-4	1014	5	0	0	0.573758	0.547448	0.314102	0.783488	WG76-4-BR	5	unknown	nose hole	5	3	2	2	8.37758	20.2419	11.6139	12.5664
WG81-3	1052	1	0	0	1.24263	0.0328779	0.0408552	0.531081	WG81-3-BL	1	unknown	bowl	6	5	2	2.75	15.8389	32.9261	40.9151	23.7583
WG92-2	835	1	0	0	0.892197	0.723626	0.645617	0.663322	WG92-2-AL	1	unknown	bowl	4.5	4	2	2.125	9.4575	22.0778	19.6977	14.1863
WG92-2	834	2	0	0	1.12037	0.425397	0.4766	0.577221	WG92-2-AR	1	bird	nose hole	5	2	4.5	1.75	14.4317	30.5339	34.2091	9.62113
WG92-2	834	2	0	0	1.12037	0.425397	0.4766	0.577221	WG92-2-AR	2	unknown	bowl	4.5	4.5	4.5	2.25	23.8565	46.556	52.1597	15.9043
WG92-2	833	5	0	1	0.790237	0.163957	0.129565	0.701797	WG92-2-BL	1	rabbit	rabbit	5.5	3	2	2.125	9.4575	22.0778	17.4467	14.1863
WG92-2	833	5	0	1	0.790237	0.163957	0.129565	0.701797	WG92-2-BL	2	bird	leaning cone	3	2	2	1.25	3.27249	11.5632	9.1377	4.90874
WG92-2	833	5	0	1	0.790237	0.163957	0.129565	0.701797	WG92-2-BL	3	bird	leaning cone	2	2	2.5	1	2.61799	10.4506	8.25844	3.14159
WG92-2	833	5	0	1	0.790237	0.163957	0.129565	0.701797	WG92-2-BL	4	bird	scratch	5.5	3	2	2.125	9.4575	22.0778	17.4467	14.1863
WG92-2	833	5	0	1	0.790237	0.163957	0.129565	0.701797	WG92-2-BL	5	bird	scratch	3	2	0.5	1.25	0.818123	7.39081	5.84049	4.90874
WG92-2	832	1	0	1	0.830958	0.37094	0.308235	0.686431	WG92-2-BR	1	rabbit	scratch	19	8	2	6.75	95.4259	168.224	139.787	143.139
WG92-4	927	6	0	6	1.24081	0.349146	0.433225	0.531768	WG92-4-AL	1	rabbit	scratch	9	7	0.5	4	8.37758	20.2419	25.1164	50.2655
WG92-4	927	6	0	6	1.24081	0.349146	0.433225	0.531768	WG92-4-AL	2	rabbit	scratch	6	4	0.5	2.5	3.27249	11.5632	14.3478	19.635
WG92-4	927	6	0	6	1.24081	0.349146	0.433225	0.531768	WG92-4-AL	3	rabbit	scratch	8	5	0.5	3.25	5.53051	15.4019	19.1109	33.1831
WG92-4	927	6	0	6	1.24081	0.349146	0.433225	0.531768	WG92-4-AL	4	rabbit	scratch	4	3	0.5	1.75	1.60352	8.72599	10.8273	9.62113
WG92-4	927	6	0	6	1.24081	0.349146	0.433225	0.531768	WG92-4-AL	5	rabbit	scratch	6	3	0.5	2.25	2.65072	10.5062	13.0363	15.9043
WG92-4	927	6	0	6	1.24081	0.349146	0.433225	0.531768	WG92-4-AL	6	rabbit	scratch	9	5	0.5	3.5	6.41409	16.9039	20.9747	38.4845
WG92-4	924	1	0	1	1.1591	0.365749	0.423939	0.562605	WG92-4-BL	1	rabbit	scratch	6	3	0.5	2.25	2.65072	10.5062	12.1777	15.9043
WG108-1	992	7	0	4	0.973833	0.0764145	0.074415	0.632516	WG108-1-AL	1	rabbit	rabbit	11	7	3	4.5	63.6173	114.149	111.162	63.6173
WG108-1	992	7	0	4	0.973833	0.0764145	0.074415	0.632516	WG108-1-AL	2	rabbit	rabbit	9	4	2	3.25	22.122	43.6075	42.4664	33.1831
WG108-1	992	7	0	4	0.973833	0.0764145	0.074415	0.632516	WG108-1-AL	3	unknown	bowl	10	9	2	4.75	47.2548	86.3331	84.0741	70.8822
WG108-1	992	7	0	4	0.973833	0.0764145	0.074415	0.632516	WG108-1-AL	4	rabbit	bowl	12	8	2	5	52.3599	95.0118	92.5257	78.5398
WG108-1	992	7	0	4	0.973833	0.0764145	0.074415	0.632516	WG108-1-AL	5	unknown	bowl	12	7	3	4.75	70.8822	126.5	123.19	70.8822
WG108-1	992	7	0	4	0.973833	0.0764145	0.074415	0.632516	WG108-1-AL	6	rabbit	rabbit	15	7	5	5.5	158.389	275.261	268.058	95.0332
WG108-1	992	7	0	4	0.973833	0.0764145	0.074415	0.632516	WG108-1-AL	7	unknown	bowl	6	6	7	3	65.9734	118.155	115.063	28.2743
WG108-1	993	2	0	0	0.967613	0.248267	0.240226	0.634863	WG108-1-AR	1	unknown	nose hole	4	4	1	2	4.18879	13.1209	12.696	12.5664
WG108-1	993	2	0	0	0.967613	0.248267	0.240226	0.634863	WG108-1-AR	2	unknown	scratch	9	7	0	4	0	6	5.80568	50.2655
WG108-1	995	2	0	0	0.985704	0.107888	0.106345	0.628036	WG108-1-BL	1	unknown	bowl	5	4	2.5	2.25	13.2536	28.5311	28.1232	15.9043
WG108-1	995	2	0	0	0.985704	0.107888	0.106345	0.628036	WG108-1-BL	2	unknown	bowl	7	6	1	3.25	11.061	24.8037	24.4492	33.1831
WG108-1	994	11	0	3	1.0001	0.0970824	0.0970925	0.622602	WG108-1-BR	1	rabbit	rabbit	15	8	3	5.75	103.869	182.577	182.596	103.869
WG108-1	994	11	0	3	1.0001	0.0970824	0.0970925	0.622602	WG108-1-BR	2	unknown	nose hole	5	4	2	2.25	10.6029	24.0249	24.0274	15.9043
WG108-1	994	11	0	3	1.0001	0.0970824	0.0970925	0.622602	WG108-1-BR	3	unknown	scratch	12	10	1	5.5	31.6777	59.8521	59.8584	95.0332
WG108-1	994	11	0	3	1.0001	0.0970824	0.0970925	0.622602	WG108-1-BR	4	unknown	bowl	5	4	2	2.25	10.6029	24.0249	24.0274	15.9043
WG108-1	994	11	0	3	1.0001	0.0970824	0.0970925	0.622602	WG108-1-BR	5	rabbit	nose hole	7	4	2	2.75	15.8389	32.9261	32.9295	23.7583
WG108-1	994	11	0	3	1.0001	0.0970824	0.0970925	0.622602	WG108-1-BR	6	rabbit	bowl	11	9	2	5	52.3599	95.0118	95.0217	78.5398
WG108-1	994	11	0	3	1.0001	0.0970824	0.0970925	0.622602	WG108-1-BR	7	unknown	scratch	14	8	1	5.5	31.6777	59.8521	59.8584	95.0332
WG108-1	994	11	0	3	1.0001	0.0970824	0.0970925	0.622602	WG108-1-BR	8	unknown	bowl	8	8	4	4	67.0206	119.935	119.948	50.2655
WG108-1	994	11	0	3	1.0001	0.0970824	0.0970925	0.622602	WG108-1-BR	9	unknown	nose hole	4	4	2.5	2	10.472	23.8024	23.8048	12.5664
WG108-1	994	11	0	3	1.0001	0.0970824	0.0970925	0.622602	WG108-1-BR	10	unknown	scratch	13	11	1	6	37.6991	70.0885	70.0958	113.097
WG108-1	994	11	0	3	1.0001	0.0970824	0.0970925	0.622602	WG108-1-BR	11	unknown	rabbit	10	6	2	4	33.5103	62.9675	62.9741	50.2655
WG108-2	996	15	0	0	0.919392	0.101101	0.0929512	0.653059	WG108-2-AL	1	unknown	root	11	11	2	5.5	63.3555	113.704	104.539	95.0332
WG108-2	996	15	0	0	0.919392	0.101101	0.0929512	0.653059	WG108-2-AL	2	unknown	bowl	13	7	2	5	52.3599	95.0118	87.3531	78.5398
WG108-2	996	15	0	0	0.919392	0.101101	0.0929512	0.653059	WG108-2-AL	3	bird	nose hole	4	3	2	1.75	6.41409	16.9039	15.5414	9.62113
WG108-2	996	15	0	0	0.919392	0.101101	0.0929512	0.653059	WG108-2-AL	4	unknown	bowl	8	6	2	3.5	25.6563	49.6158	45.6164	38.4845
WG108-2	996	15	0	0	0.919392	0.101101	0.0929512	0.653059	WG108-2-AL	5	bird	nose hole	3	2	2	1.25	3.27249	11.5632	10.6312	4.90874
WG108-2	996	15	0	0	0.919392	0.101101	0.0929512	0.653059	WG108-2-AL	6	unknown	nose hole	3	3	1	1.5	2.35619	10.0055	9.19901	7.06858
WG108-2	996	15	0	0	0.919392	0.101101	0.0929512	0.653059	WG108-2-AL	7	bird	nose hole	2.5	2	2	1.125	2.65072	10.5062	9.65934	3.97608
WG108-2	996	15	0	0	0.919392	0.101101	0.0929512	0.653059	WG108-2-AL	8	bird	nose hole	2	2	2	1	2.0944	9.56047	8.78983	3.14159
WG108-2	996	15	0	0	0.919392	0.101101	0.0929512	0.653059	WG108-2-AL	9	unknown	bowl	8	7	4	3.75	58.9049	106.138	97.5827	44.1786
WG108-2	996	15	0	0	0.919392	0.101101	0.0929512	0.653059	WG108-2-AL	10	bird	nose hole	3	2.5	2	1.375	3.95972	12.7315	11.7053	5.93957
WG108-2	996	15	0	0	0.919392	0.101101	0.0929512	0.653059	WG108-2-AL	11	bird	nose hole	3	2	2	1.25	3.27249	11.5632	10.6312	4.90874
WG108-2	996	15	0	0	0.919392	0.101101	0.0929512	0.653059	WG108-2-AL	12	unknown	bowl	9	7	5	4	83.7758	148.419	136.455	50.2655
WG108-2	996	15	0	0	0.919392	0.101101	0.0929512	0.653059	WG108-2-AL	13	echidna	leaning cone	13	13	8	6.5	353.953	607.72	558.733	132.732
WG108-2	996	15	0	0	0.919392	0.101101	0.0929512	0.653059	WG108-2-AL	14	bird	nose hole	3	2	1	1.25	1.63625	8.78162	8.07375	4.90874
WG108-2	996	15	0	0	0.919392	0.101101	0.0929512	0.653059	WG108-2-AL	15	echidna	leaning cone	6	4	4	2.5	26.1799	50.5059	46.4347	19.635
WG109-2	810	6	0	6	1.11211	0.162054	0.180222	0.580334	WG109-2-AR	1	rabbit	scratch	6	4	1	2.5	6.54498	17.1265	19.0466	19.635
WG109-2	810	6	0	6	1.11211	0.162054	0.180222	0.580334	WG109-2-AR	2	rabbit	bowl	9	4.5	3	3.375	35.7847	66.834	74.327	35.7847
WG109-2	810	6	0	6	1.11211	0.162054	0.180222	0.580334	WG109-2-AR	3	rabbit	bowl	10	9	6	4.75	141.764	246.999	274.692	70.8822
WG109-2	810	6	0	6	1.11211	0.162054	0.180222	0.580334	WG109-2-AR	4	rabbit	scratch	5.5	5	1	2.625	7.21585	18.2669	20.3149	21.6475
WG109-2	810	6	0	6	1.11211	0.162054	0.180222	0.580334	WG109-2-AR	5	rabbit	bowl	12	8	8	5	209.44	362.047	402.638	78.5398
WG109-2	810	6	0	6	1.11211	0.162054	0.180222	0.580334	WG109-2-AR	6	rabbit	scratch	12	7	5	4.75	118.137	206.833	230.022	70.8822
WG109-2	809	3	0	3	0.920025	0.143131	0.131684	0.652821	WG109-2-BR	1	rabbit	scratch	28	14	3	10.5	346.361	594.813	547.243	346.361
WG109-2	809	3	0	3	0.920025	0.143131	0.131684	0.652821	WG109-2-BR	2	rabbit	scratch	10	6	1	4	16.7552	34.4838	31.7259	50.2655
WG109-2	809	3	0	3	0.920025	0.143131	0.131684	0.652821	WG109-2-BR	3	rabbit	scratch	7	5	1	3	9.42478	22.0221	20.2609	28.2743
WG109-3	1019	6	0	0	1.02559	0.136093	0.139575	0.612986	WG109-3-AL	1	unknown	bowl	11	9	3	5	78.5398	139.518	143.087	78.5398
WG109-3	1019	6	0	0	1.02559	0.136093	0.139575	0.612986	WG109-3-AL	2	unknown	bowl	8	4	2.5	3	23.5619	46.0553	47.2337	28.2743
WG109-3	1019	6	0	0	1.02559	0.136093	0.139575	0.612986	WG109-3-AL	3	unknown	bowl	6	5	4	2.75	31.6777	59.8521	61.3835	23.7583
WG109-3	1019	6	0	0	1.02559	0.136093	0.139575	0.612986	WG109-3-AL	4	unknown	bowl	6	5	1	2.75	7.91943	19.463	19.961	23.7583
WG109-3	1019	6	0	0	1.02559	0.136093	0.139575	0.612986	WG109-3-AL	5	unknown	scratch	8	6	1	3.5	12.8282	27.8079	28.5194	38.4845
WG109-3	1019	6	0	0	1.02559	0.136093	0.139575	0.612986	WG109-3-AL	6	unknown	scratch	9	6	0.5	3.75	7.36311	18.5173	18.9911	44.1786
WG109-3	1018	9	0	0	0.859812	0.126733	0.108966	0.675543	WG109-3-AR	1	unknown	bowl	7	4	3	2.75	23.7583	46.3891	39.8859	23.7583
WG109-3	1018	9	0	0	0.859812	0.126733	0.108966	0.675543	WG109-3-AR	2	unknown	scratch	8	5	0.5	3.25	5.53051	15.4019	13.2427	33.1831
WG109-3	1018	9	0	0	0.859812	0.126733	0.108966	0.675543	WG109-3-AR	3	unknown	scratch	7	5	0	3	0	6	5.15887	28.2743
WG109-3	1018	9	0	0	0.859812	0.126733	0.108966	0.675543	WG109-3-AR	4	unknown	scratch	13	12	0.5	6.25	20.4531	40.7702	35.0547	122.718
WG109-3	1018	9	0	0	0.859812	0.126733	0.108966	0.675543	WG109-3-AR	5	unknown	scratch	5	5	1	2.5	6.54498	17.1265	14.7256	19.635
WG109-3	1018	9	0	0	0.859812	0.126733	0.108966	0.675543	WG109-3-AR	6	unknown	scratch	12	3	1	3.75	14.7262	31.0346	26.6839	44.1786
WG109-3	1018	9	0	0	0.859812	0.126733	0.108966	0.675543	WG109-3-AR	7	unknown	scratch	8	6	1	3.5	12.8282	27.8079	23.9096	38.4845
WG109-3	1018	9	0	0	0.859812	0.126733	0.108966	0.675543	WG109-3-AR	8	unknown	scratch	9	6	1	3.75	14.7262	31.0346	26.6839	44.1786
WG109-3	1018	9	0	0	0.859812	0.126733	0.108966	0.675543	WG109-3-AR	9	unknown	scratch	9	9	1	4.5	21.2058	42.0498	36.1549	63.6173
WG148-1	960	2	0	2	1.16012	0.177778	0.206244	0.562219	WG148-1-AL	1	rabbit	rabbit	11	5	3.5	4	58.6431	105.693	122.617	50.2655
WG148-1	960	2	0	2	1.16012	0.177778	0.206244	0.562219	WG148-1-AL	2	rabbit	scratch	6	3	0.5	2.25	2.65072	10.5062	12.1885	15.9043
WG148-1	961	1	0	1	1.14744	0.193091	0.22156	0.567005	WG148-1-AR	1	rabbit	scratch	6	4	0.5	2.5	3.27249	11.5632	13.2681	19.635
WG148-1	963	8	0	8	1.17745	0.385579	0.454	0.555679	WG148-1-BR	1	rabbit	scratch	5	3	0.5	2	2.0944	9.56047	11.257	12.5664
WG148-1	963	8	0	8	1.17745	0.385579	0.454	0.555679	WG148-1-BR	2	rabbit	scratch	10	7	1	4.25	18.915	38.1555	44.9262	56.745
WG148-1	963	8	0	8	1.17745	0.385579	0.454	0.555679	WG148-1-BR	3	rabbit	scratch	12	7	2	4.75	47.2548	86.3331	101.653	70.8822
WG148-1	963	8	0	8	1.17745	0.385579	0.454	0.555679	WG148-1-BR	4	rabbit	leaning cone	15	9	5	6	188.496	326.442	384.37	113.097
WG148-1	963	8	0	8	1.17745	0.385579	0.454	0.555679	WG148-1-BR	5	rabbit	rabbit	10	4	2.5	3.5	32.0704	60.5197	71.2589	38.4845
WG148-1	963	8	0	8	1.17745	0.385579	0.454	0.555679	WG148-1-BR	6	rabbit	rabbit	17	7	4	6	150.796	262.354	308.909	113.097
WG148-1	963	8	0	8	1.17745	0.385579	0.454	0.555679	WG148-1-BR	7	rabbit	scratch	8	5	0.5	3.25	5.53051	15.4019	18.1349	33.1831
WG148-1	963	8	0	8	1.17745	0.385579	0.454	0.555679	WG148-1-BR	8	rabbit	leaning cone	8	6	3	3.5	38.4845	71.4237	84.0978	38.4845
WG148-3	843	1	0	0	1.04748	0.309682	0.324385	0.604725	WG148-3-AL	1	unknown	bowl	4	3.5	1	1.875	3.68155	12.2586	12.8407	11.0447
WG148-3	842	1	0	0	1.16348	0.141837	0.165025	0.56095	WG148-3-AR	1	unknown	scratch	8	5	0.5	3.25	5.53051	15.4019	17.9198	33.1831
WG148-3	841	1	0	0	1.3068	0.133711	0.174733	0.506869	WG148-3-BR	1	bird	nose hole	1.5	1	1	0.625	0.409062	6.6954	8.74955	1.22718
WG150A-1	1074	2	0	0	0.95878	0.0536877	0.0514746	0.638196	WG150A-1-AR	1	unknown	bowl	7	6	2	3.25	22.122	43.6075	41.81	33.1831
WG150A-1	1074	2	0	0	0.95878	0.0536877	0.0514746	0.638196	WG150A-1-AR	2	unknown	bowl	7	7	3	3.5	38.4845	71.4237	68.4796	38.4845
WG150A-4	1076	1	0	0	1.07323	0.0357534	0.0383718	0.595007	WG150A-4-AL	1	unknown	bowl	8	7	3	3.75	44.1786	81.1037	87.0432	44.1786
WG150A-4	1077	1	0	0	1.2399	0.0381652	0.0473209	0.532115	WG150A-4-AR	1	unknown	bowl	8	6	6	3.5	76.969	136.847	169.676	38.4845
WG150A-4	1078	1	0	0	1.11285	0.0276355	0.030754	0.580058	WG150A-4-BR	1	unknown	nose hole	6	5	5	2.75	39.5972	73.3152	81.5885	23.7583
MF9A-1	836	25	23	0	0.785141	0.302374	0.237406	0.70372	MF9A-1-AL	1	unknown	scratch	4	2	0.5	1.5	1.1781	8.00277	6.2833	7.06858
MF9A-1	836	25	23	0	0.785141	0.302374	0.237406	0.70372	MF9A-1-AL	2	unknown	bowl	3.5	3	1	1.625	2.76526	10.7009	8.40174	8.29577
MF9A-1	836	25	23	0	0.785141	0.302374	0.237406	0.70372	MF9A-1-AL	3	bettong	root	5	5	3	2.5	19.635	39.3794	30.9184	19.635
MF9A-1	836	25	23	0	0.785141	0.302374	0.237406	0.70372	MF9A-1-AL	4	bettong	root	3	2	2	1.25	3.27249	11.5632	9.07877	4.90874
MF9A-1	836	25	23	0	0.785141	0.302374	0.237406	0.70372	MF9A-1-AL	5	bettong	nose hole	5	4	3	2.25	15.9043	33.0373	25.939	15.9043
MF9A-1	836	25	23	0	0.785141	0.302374	0.237406	0.70372	MF9A-1-AL	6	bettong	nose hole	3	3	2.5	1.5	5.89049	16.0138	12.5731	7.06858
MF9A-1	836	25	23	0	0.785141	0.302374	0.237406	0.70372	MF9A-1-AL	7	bettong	leaning cone	4	4	2.5	2	10.472	23.8024	18.6882	12.5664
MF9A-1	836	25	23	0	0.785141	0.302374	0.237406	0.70372	MF9A-1-AL	8	bettong	leaning cone	4	3	3.5	1.75	11.2246	25.0819	19.6928	9.62113
MF9A-1	836	25	23	0	0.785141	0.302374	0.237406	0.70372	MF9A-1-AL	9	bettong	nose hole	3	3	3.5	1.5	8.24668	20.0194	15.718	7.06858
MF9A-1	836	25	23	0	0.785141	0.302374	0.237406	0.70372	MF9A-1-AL	10	bettong	nose hole	3	3	4	1.5	9.42478	22.0221	17.2905	7.06858
MF9A-1	836	25	23	0	0.785141	0.302374	0.237406	0.70372	MF9A-1-AL	11	bettong	leaning cone	4	3	3	1.75	9.62113	22.3559	17.5525	9.62113
MF9A-1	836	25	23	0	0.785141	0.302374	0.237406	0.70372	MF9A-1-AL	12	bettong	nose hole	3.5	3	4	1.625	11.061	24.8037	19.4744	8.29577
MF9A-1	836	25	23	0	0.785141	0.302374	0.237406	0.70372	MF9A-1-AL	13	bettong	nose hole	3	2.5	4	1.375	7.91943	19.463	15.2812	5.93957
MF9A-1	836	25	23	0	0.785141	0.302374	0.237406	0.70372	MF9A-1-AL	14	bettong	nose hole	3.5	3	4	1.625	11.061	24.8037	19.4744	8.29577
MF9A-1	836	25	23	0	0.785141	0.302374	0.237406	0.70372	MF9A-1-AL	15	bettong	nose hole	4	3.5	4.5	1.875	16.567	34.1639	26.8235	11.0447
MF9A-1	836	25	23	0	0.785141	0.302374	0.237406	0.70372	MF9A-1-AL	16	bettong	bowl	6	5	3	2.75	23.7583	46.3891	36.422	23.7583
MF9A-1	836	25	23	0	0.785141	0.302374	0.237406	0.70372	MF9A-1-AL	17	bettong	nose hole	4	4	4	2	16.7552	34.4838	27.0746	12.5664
MF9A-1	836	25	23	0	0.785141	0.302374	0.237406	0.70372	MF9A-1-AL	18	bettong	nose hole	4	3.5	3	1.875	11.0447	24.7759	19.4526	11.0447
MF9A-1	836	25	23	0	0.785141	0.302374	0.237406	0.70372	MF9A-1-AL	19	bettong	bowl	6	5	4	2.75	31.6777	59.8521	46.9924	23.7583
MF9A-1	836	25	23	0	0.785141	0.302374	0.237406	0.70372	MF9A-1-AL	20	bettong	nose hole	4	3.5	3.5	1.875	12.8854	27.9052	21.9096	11.0447
MF9A-1	836	25	23	0	0.785141	0.302374	0.237406	0.70372	MF9A-1-AL	21	bettong	bowl	5	4	4	2.25	21.2058	42.0498	33.015	15.9043
MF9A-1	836	25	23	0	0.785141	0.302374	0.237406	0.70372	MF9A-1-AL	22	bettong	root	7	3.5	5	2.625	36.0792	67.3347	52.8672	21.6475
MF9A-1	836	25	23	0	0.785141	0.302374	0.237406	0.70372	MF9A-1-AL	23	bettong	bowl	4.5	4	3.5	2.125	16.5506	34.1361	26.8016	14.1863
MF9A-1	836	25	23	0	0.785141	0.302374	0.237406	0.70372	MF9A-1-AL	24	bettong	nose hole	3.5	3	4	1.625	11.061	24.8037	19.4744	8.29577
MF9A-1	836	25	23	0	0.785141	0.302374	0.237406	0.70372	MF9A-1-AL	25	bettong	root	7	5	5	3	47.1239	86.1106	67.609	28.2743
MF9A-1	837	18	0	8	0.471366	0.491121	0.231498	0.822126	MF9A-1-AR	1	unknown	scratch	3	2	0.5	1.25	0.818123	7.39081	3.48378	4.90874
MF9A-1	837	18	0	8	0.471366	0.491121	0.231498	0.822126	MF9A-1-AR	2	unknown	scratch	3	1.5	0.5	1.125	0.66268	7.12656	3.35922	3.97608
MF9A-1	837	18	0	8	0.471366	0.491121	0.231498	0.822126	MF9A-1-AR	3	unknown	scratch	7	5	0.5	3	4.71239	14.0111	6.60434	28.2743
MF9A-1	837	18	0	8	0.471366	0.491121	0.231498	0.822126	MF9A-1-AR	4	bird	nose hole	2.5	1	2	0.875	1.60352	8.72599	4.11314	2.40528
MF9A-1	837	18	0	8	0.471366	0.491121	0.231498	0.822126	MF9A-1-AR	5	bird	scratch	2	1	1	0.75	0.589049	7.00138	3.30022	1.76715
MF9A-1	837	18	0	8	0.471366	0.491121	0.231498	0.822126	MF9A-1-AR	6	bird	scratch	7	5	0.5	3	4.71239	14.0111	6.60434	28.2743
MF9A-1	837	18	0	8	0.471366	0.491121	0.231498	0.822126	MF9A-1-AR	7	rabbit	scratch	6	5	1	2.75	7.91943	19.463	9.17422	23.7583
MF9A-1	837	18	0	8	0.471366	0.491121	0.231498	0.822126	MF9A-1-AR	8	rabbit	scratch	5	3	0.2	2	0.837758	7.42419	3.49951	12.5664
MF9A-1	837	18	0	8	0.471366	0.491121	0.231498	0.822126	MF9A-1-AR	9	rabbit	scratch	6	1.5	0	1.875	0	6	2.8282	11.0447
MF9A-1	837	18	0	8	0.471366	0.491121	0.231498	0.822126	MF9A-1-AR	10	unknown	scratch	2	2	0.5	1	0.523599	6.89012	3.24777	3.14159
MF9A-1	837	18	0	8	0.471366	0.491121	0.231498	0.822126	MF9A-1-AR	11	bird	nose hole	2	1	0.5	0.75	0.294524	6.50069	3.06421	1.76715
MF9A-1	837	18	0	8	0.471366	0.491121	0.231498	0.822126	MF9A-1-AR	12	unknown	scratch	3.5	2	0	1.375	0	6	2.8282	5.93957
MF9A-1	837	18	0	8	0.471366	0.491121	0.231498	0.822126	MF9A-1-AR	13	rabbit	rabbit	9	8	6	4.25	113.49	198.933	93.7704	56.745
MF9A-1	837	18	0	8	0.471366	0.491121	0.231498	0.822126	MF9A-1-AR	14	rabbit	scratch	8	5	0.5	3.25	5.53051	15.4019	7.25992	33.1831
MF9A-1	837	18	0	8	0.471366	0.491121	0.231498	0.822126	MF9A-1-AR	15	rabbit	scratch	3	2	0.5	1.25	0.818123	7.39081	3.48378	4.90874
MF9A-1	837	18	0	8	0.471366	0.491121	0.231498	0.822126	MF9A-1-AR	16	rabbit	scratch	4	2	1	1.5	2.35619	10.0055	4.71627	7.06858
MF9A-1	837	18	0	8	0.471366	0.491121	0.231498	0.822126	MF9A-1-AR	17	rabbit	scratch	5	2	0.5	1.75	1.60352	8.72599	4.11314	9.62113
MF9A-1	837	18	0	8	0.471366	0.491121	0.231498	0.822126	MF9A-1-AR	18	unknown	scratch	4	2	1	1.5	2.35619	10.0055	4.71627	7.06858
MF9A-1	839	6	0	3	0.994744	0.220851	0.21969	0.624625	MF9A-1-BL	1	unknown	scratch	5	2.5	0	1.875	0	6	5.96846	11.0447
MF9A-1	839	6	0	3	0.994744	0.220851	0.21969	0.624625	MF9A-1-BL	2	unknown	rabbit	4.5	2.5	1	1.75	3.20704	11.452	11.3918	9.62113
MF9A-1	839	6	0	3	0.994744	0.220851	0.21969	0.624625	MF9A-1-BL	3	rabbit	scratch	19	5	0.5	6	18.8496	38.0442	37.8443	113.097
MF9A-1	839	6	0	3	0.994744	0.220851	0.21969	0.624625	MF9A-1-BL	4	rabbit	scratch	9	4	0	3.25	0	6	5.96846	33.1831
MF9A-1	839	6	0	3	0.994744	0.220851	0.21969	0.624625	MF9A-1-BL	5	rabbit	scratch	9	8	0.5	4.25	9.4575	22.0778	21.9617	56.745
MF9A-1	839	6	0	3	0.994744	0.220851	0.21969	0.624625	MF9A-1-BL	6	unknown	bowl	3	2.5	0.5	1.375	0.989929	7.68288	7.6425	5.93957
MF9A-1	838	9	4	3	1.27393	0.0767576	0.097784	0.519271	MF9A-1-BR	1	bettong	bowl	3	3	0.5	1.5	1.1781	8.00277	10.195	7.06858
MF9A-1	838	9	4	3	1.27393	0.0767576	0.097784	0.519271	MF9A-1-BR	2	bettong	leaning cone	4	3	2	1.75	6.41409	16.9039	21.5345	9.62113
MF9A-1	838	9	4	3	1.27393	0.0767576	0.097784	0.519271	MF9A-1-BR	3	bettong	leaning cone	3.5	3	2	1.625	5.53051	15.4019	19.621	8.29577
MF9A-1	838	9	4	3	1.27393	0.0767576	0.097784	0.519271	MF9A-1-BR	4	unknown	scratch	8	6	0	3.5	0	6	7.6436	38.4845
MF9A-1	838	9	4	3	1.27393	0.0767576	0.097784	0.519271	MF9A-1-BR	5	rabbit	leaning cone	6	4	2	2.5	13.09	28.2529	35.9924	19.635
MF9A-1	838	9	4	3	1.27393	0.0767576	0.097784	0.519271	MF9A-1-BR	6	rabbit	leaning cone	10	3.5	2	3.375	23.8565	46.556	59.3092	35.7847
MF9A-1	838	9	4	3	1.27393	0.0767576	0.097784	0.519271	MF9A-1-BR	7	bettong	leaning cone	4	3	2	1.75	6.41409	16.9039	21.5345	9.62113
MF9A-1	838	9	4	3	1.27393	0.0767576	0.097784	0.519271	MF9A-1-BR	8	rabbit	scratch	7.5	4.5	0.5	3	4.71239	14.0111	17.8492	28.2743
MF9A-1	838	9	4	3	1.27393	0.0767576	0.097784	0.519271	MF9A-1-BR	9	unknown	bowl	3	2.5	1	1.375	1.97986	9.36576	11.9313	5.93957
MF25A-2	938	7	2	3	0.710316	1.03256	0.733447	0.731956	MF25A-2-BR	1	bird	scratch	5	4	1	2.25	5.30144	15.0124	10.6636	15.9043
MF25A-2	938	7	2	3	0.710316	1.03256	0.733447	0.731956	MF25A-2-BR	2	bird	scratch	11	6	0.5	4.25	9.4575	22.0778	15.6822	56.745
MF25A-2	938	7	2	3	0.710316	1.03256	0.733447	0.731956	MF25A-2-BR	3	rabbit	scratch	7	4	1	2.75	7.91943	19.463	13.8249	23.7583
MF25A-2	938	7	2	3	0.710316	1.03256	0.733447	0.731956	MF25A-2-BR	4	rabbit	scratch	14	7	0.5	5.25	14.4317	30.5339	21.6887	86.5901
MF25A-2	938	7	2	3	0.710316	1.03256	0.733447	0.731956	MF25A-2-BR	5	rabbit	scratch	20	10	1	7.5	58.9049	106.138	75.3918	176.715
MF25A-2	938	7	2	3	0.710316	1.03256	0.733447	0.731956	MF25A-2-BR	6	bettong	leaning cone	4.5	3	2	1.875	7.36311	18.5173	13.1531	11.0447
MF25A-2	938	7	2	3	0.710316	1.03256	0.733447	0.731956	MF25A-2-BR	7	bettong	leaning cone	3.5	2.5	2	1.5	4.71239	14.0111	9.95229	7.06858
MF9A-3	912	81	62	16	0.941503	0.217827	0.205084	0.644716	MF9A-3-BL	20	bettong	nose hole	8	6	3.5	3.5	44.8986	82.3276	77.5117	38.4845
MF9A-3	912	81	62	16	0.941503	0.217827	0.205084	0.644716	MF9A-3-BL	21	bettong	nose hole	7	5	4	3	37.6991	70.0885	65.9885	28.2743
MF9A-3	912	81	62	16	0.941503	0.217827	0.205084	0.644716	MF9A-3-BL	22	bettong	nose hole	8	5	3	3.25	33.1831	62.4112	58.7604	33.1831
MF9A-3	912	81	62	16	0.941503	0.217827	0.205084	0.644716	MF9A-3-BL	23	bettong	nose hole	7	6	3.5	3.25	38.7136	71.8131	67.6122	33.1831
MF9A-3	912	81	62	16	0.941503	0.217827	0.205084	0.644716	MF9A-3-BL	24	bettong	nose hole	9	6	3	3.75	44.1786	81.1037	76.3594	44.1786
MF9A-3	912	81	62	16	0.941503	0.217827	0.205084	0.644716	MF9A-3-BL	25	bettong	nose hole	8	6	4	3.5	51.3127	93.2316	87.7778	38.4845
MF9A-3	912	81	62	16	0.941503	0.217827	0.205084	0.644716	MF9A-3-BL	26	bettong	nose hole	5	5	4	2.5	26.1799	50.5059	47.5515	19.635
MF9A-3	912	81	62	16	0.941503	0.217827	0.205084	0.644716	MF9A-3-BL	1	bettong	nose hole	6	4	2	2.5	13.09	28.2529	26.6002	19.635
MF9A-3	912	81	62	16	0.941503	0.217827	0.205084	0.644716	MF9A-3-BL	2	bettong	nose hole	5	3	3.5	2	14.6608	30.9233	29.1144	12.5664
MF9A-3	912	81	62	16	0.941503	0.217827	0.205084	0.644716	MF9A-3-BL	3	bettong	nose hole	9	6	4	3.75	58.9049	106.138	99.9295	44.1786
MF9A-3	912	81	62	16	0.941503	0.217827	0.205084	0.644716	MF9A-3-BL	4	bettong	nose hole	5	4.5	3	2.375	17.7205	36.1249	34.0117	17.7205
MF9A-3	912	81	62	16	0.941503	0.217827	0.205084	0.644716	MF9A-3-BL	5	bettong	nose hole	5	4.5	2.5	2.375	14.7671	31.1041	29.2846	17.7205
MF9A-3	912	81	62	16	0.941503	0.217827	0.205084	0.644716	MF9A-3-BL	6	bettong	nose hole	10	6.5	3	4.125	53.4562	96.8755	91.2086	53.4562
MF9A-3	912	81	62	16	0.941503	0.217827	0.205084	0.644716	MF9A-3-BL	7	bettong	nose hole	8.5	6	2.5	3.625	34.4021	64.4835	60.7114	41.2825
MF9A-3	912	81	62	16	0.941503	0.217827	0.205084	0.644716	MF9A-3-BL	8	bettong	nose hole	6	4.5	4	2.625	28.8634	55.0678	51.8465	21.6475
MF9A-3	912	81	62	16	0.941503	0.217827	0.205084	0.644716	MF9A-3-BL	9	bettong	nose hole	5	4	2.5	2.25	13.2536	28.5311	26.8621	15.9043
MF9A-3	912	81	62	16	0.941503	0.217827	0.205084	0.644716	MF9A-3-BL	10	bettong	nose hole	6	4.5	5	2.625	36.0792	67.3347	63.3958	21.6475
MF9A-3	912	81	62	16	0.941503	0.217827	0.205084	0.644716	MF9A-3-BL	11	bettong	nose hole	5	4.5	3.5	2.375	20.674	41.1457	38.7388	17.7205
MF9A-3	912	81	62	16	0.941503	0.217827	0.205084	0.644716	MF9A-3-BL	12	bettong	nose hole	6	4.5	3.5	2.625	25.2555	48.9343	46.0718	21.6475
MF9A-3	912	81	62	16	0.941503	0.217827	0.205084	0.644716	MF9A-3-BL	13	bettong	nose hole	6.5	4	4	2.625	28.8634	55.0678	51.8465	21.6475
MF9A-3	912	81	62	16	0.941503	0.217827	0.205084	0.644716	MF9A-3-BL	14	bettong	nose hole	4.5	4	4	2.125	18.915	38.1555	35.9235	14.1863
MF9A-3	912	81	62	16	0.941503	0.217827	0.205084	0.644716	MF9A-3-BL	15	bettong	nose hole	7	5.5	4.5	3.125	46.0194	84.233	79.3056	30.6796
MF9A-3	912	81	62	16	0.941503	0.217827	0.205084	0.644716	MF9A-3-BL	16	bettong	nose hole	8	7	3	3.75	44.1786	81.1037	76.3594	44.1786
MF9A-3	912	81	62	16	0.941503	0.217827	0.205084	0.644716	MF9A-3-BL	17	bettong	nose hole	10	8	4	4.5	84.823	150.199	141.413	63.6173
MF9A-3	912	81	62	16	0.941503	0.217827	0.205084	0.644716	MF9A-3-BL	18	bettong	nose hole	7	4	4	2.75	31.6777	59.8521	56.351	23.7583
MF9A-3	912	81	62	16	0.941503	0.217827	0.205084	0.644716	MF9A-3-BL	19	bettong	nose hole	7	4	3	2.75	23.7583	46.3891	43.6755	23.7583
MF9A-3	912	81	62	16	0.941503	0.217827	0.205084	0.644716	MF9A-3-BL	27	bettong		4.91	3.86	3.12	2.1925	15.7059	32.7	30.7872	15.1018
MF9A-3	912	81	62	16	0.941503	0.217827	0.205084	0.644716	MF9A-3-BL	28	unknown		7.19	4.91	1.65	3.025	15.8111	32.8789	30.9556	28.7475
MF9A-3	912	81	62	16	0.941503	0.217827	0.205084	0.644716	MF9A-3-BL	29	unknown		7.19	4.91	1.65	3.025	15.8111	32.8789	30.9556	28.7475
MF9A-3	912	81	62	16	0.941503	0.217827	0.205084	0.644716	MF9A-3-BL	30	unknown		7.19	4.91	1.65	3.025	15.8111	32.8789	30.9556	28.7475
MF9A-3	912	81	62	16	0.941503	0.217827	0.205084	0.644716	MF9A-3-BL	31	rabbit		9.95	6.14	2.16	4.0225	36.5994	68.2191	64.2284	50.8326
MF9A-3	912	81	62	16	0.941503	0.217827	0.205084	0.644716	MF9A-3-BL	32	rabbit		9.95	6.14	2.16	4.0225	36.5994	68.2191	64.2284	50.8326
MF9A-3	912	81	62	16	0.941503	0.217827	0.205084	0.644716	MF9A-3-BL	33	rabbit		9.95	6.14	2.16	4.0225	36.5994	68.2191	64.2284	50.8326
MF9A-3	912	81	62	16	0.941503	0.217827	0.205084	0.644716	MF9A-3-BL	34	rabbit		9.95	6.14	2.16	4.0225	36.5994	68.2191	64.2284	50.8326
MF9A-3	912	81	62	16	0.941503	0.217827	0.205084	0.644716	MF9A-3-BL	35	rabbit		9.95	6.14	2.16	4.0225	36.5994	68.2191	64.2284	50.8326
MF9A-3	912	81	62	16	0.941503	0.217827	0.205084	0.644716	MF9A-3-BL	36	rabbit		9.95	6.14	2.16	4.0225	36.5994	68.2191	64.2284	50.8326
MF9A-3	912	81	62	16	0.941503	0.217827	0.205084	0.644716	MF9A-3-BL	37	rabbit		9.95	6.14	2.16	4.0225	36.5994	68.2191	64.2284	50.8326
MF9A-3	912	81	62	16	0.941503	0.217827	0.205084	0.644716	MF9A-3-BL	38	rabbit		9.95	6.14	2.16	4.0225	36.5994	68.2191	64.2284	50.8326
MF9A-3	912	81	62	16	0.941503	0.217827	0.205084	0.644716	MF9A-3-BL	39	rabbit		9.95	6.14	2.16	4.0225	36.5994	68.2191	64.2284	50.8326
MF9A-3	912	81	62	16	0.941503	0.217827	0.205084	0.644716	MF9A-3-BL	40	rabbit		9.95	6.14	2.16	4.0225	36.5994	68.2191	64.2284	50.8326
MF9A-3	912	81	62	16	0.941503	0.217827	0.205084	0.644716	MF9A-3-BL	41	rabbit		9.95	6.14	2.16	4.0225	36.5994	68.2191	64.2284	50.8326
MF9A-3	912	81	62	16	0.941503	0.217827	0.205084	0.644716	MF9A-3-BL	42	rabbit		9.95	6.14	2.16	4.0225	36.5994	68.2191	64.2284	50.8326
MF9A-3	912	81	62	16	0.941503	0.217827	0.205084	0.644716	MF9A-3-BL	43	rabbit		9.95	6.14	2.16	4.0225	36.5994	68.2191	64.2284	50.8326
MF9A-3	912	81	62	16	0.941503	0.217827	0.205084	0.644716	MF9A-3-BL	44	rabbit		9.95	6.14	2.16	4.0225	36.5994	68.2191	64.2284	50.8326
MF9A-3	912	81	62	16	0.941503	0.217827	0.205084	0.644716	MF9A-3-BL	45	rabbit		9.95	6.14	2.16	4.0225	36.5994	68.2191	64.2284	50.8326
MF9A-3	912	81	62	16	0.941503	0.217827	0.205084	0.644716	MF9A-3-BL	46	rabbit		9.95	6.14	2.16	4.0225	36.5994	68.2191	64.2284	50.8326
MF9A-3	912	81	62	16	0.941503	0.217827	0.205084	0.644716	MF9A-3-BL	47	bettong		4.91	3.86	3.12	2.1925	15.7059	32.7	30.7872	15.1018
MF9A-3	912	81	62	16	0.941503	0.217827	0.205084	0.644716	MF9A-3-BL	48	bettong		4.91	3.86	3.12	2.1925	15.7059	32.7	30.7872	15.1018
MF9A-3	912	81	62	16	0.941503	0.217827	0.205084	0.644716	MF9A-3-BL	49	bettong		4.91	3.86	3.12	2.1925	15.7059	32.7	30.7872	15.1018
MF9A-3	912	81	62	16	0.941503	0.217827	0.205084	0.644716	MF9A-3-BL	50	bettong		4.91	3.86	3.12	2.1925	15.7059	32.7	30.7872	15.1018
MF9A-3	912	81	62	16	0.941503	0.217827	0.205084	0.644716	MF9A-3-BL	51	bettong		4.91	3.86	3.12	2.1925	15.7059	32.7	30.7872	15.1018
MF9A-3	912	81	62	16	0.941503	0.217827	0.205084	0.644716	MF9A-3-BL	52	bettong		4.91	3.86	3.12	2.1925	15.7059	32.7	30.7872	15.1018
MF9A-3	912	81	62	16	0.941503	0.217827	0.205084	0.644716	MF9A-3-BL	53	bettong		4.91	3.86	3.12	2.1925	15.7059	32.7	30.7872	15.1018
MF9A-3	912	81	62	16	0.941503	0.217827	0.205084	0.644716	MF9A-3-BL	54	bettong		4.91	3.86	3.12	2.1925	15.7059	32.7	30.7872	15.1018
MF9A-3	912	81	62	16	0.941503	0.217827	0.205084	0.644716	MF9A-3-BL	55	bettong		4.91	3.86	3.12	2.1925	15.7059	32.7	30.7872	15.1018
MF9A-3	912	81	62	16	0.941503	0.217827	0.205084	0.644716	MF9A-3-BL	56	bettong		4.91	3.86	3.12	2.1925	15.7059	32.7	30.7872	15.1018
MF9A-3	912	81	62	16	0.941503	0.217827	0.205084	0.644716	MF9A-3-BL	57	bettong		4.91	3.86	3.12	2.1925	15.7059	32.7	30.7872	15.1018
MF9A-3	912	81	62	16	0.941503	0.217827	0.205084	0.644716	MF9A-3-BL	58	bettong		4.91	3.86	3.12	2.1925	15.7059	32.7	30.7872	15.1018
MF9A-3	912	81	62	16	0.941503	0.217827	0.205084	0.644716	MF9A-3-BL	59	bettong		4.91	3.86	3.12	2.1925	15.7059	32.7	30.7872	15.1018
MF9A-3	912	81	62	16	0.941503	0.217827	0.205084	0.644716	MF9A-3-BL	60	bettong		4.91	3.86	3.12	2.1925	15.7059	32.7	30.7872	15.1018
MF9A-3	912	81	62	16	0.941503	0.217827	0.205084	0.644716	MF9A-3-BL	61	bettong		4.91	3.86	3.12	2.1925	15.7059	32.7	30.7872	15.1018
MF9A-3	912	81	62	16	0.941503	0.217827	0.205084	0.644716	MF9A-3-BL	62	bettong		4.91	3.86	3.12	2.1925	15.7059	32.7	30.7872	15.1018
MF9A-3	912	81	62	16	0.941503	0.217827	0.205084	0.644716	MF9A-3-BL	63	bettong		4.91	3.86	3.12	2.1925	15.7059	32.7	30.7872	15.1018
MF9A-3	912	81	62	16	0.941503	0.217827	0.205084	0.644716	MF9A-3-BL	64	bettong		4.91	3.86	3.12	2.1925	15.7059	32.7	30.7872	15.1018
MF9A-3	912	81	62	16	0.941503	0.217827	0.205084	0.644716	MF9A-3-BL	65	bettong		4.91	3.86	3.12	2.1925	15.7059	32.7	30.7872	15.1018
MF9A-3	912	81	62	16	0.941503	0.217827	0.205084	0.644716	MF9A-3-BL	66	bettong		4.91	3.86	3.12	2.1925	15.7059	32.7	30.7872	15.1018
MF9A-3	912	81	62	16	0.941503	0.217827	0.205084	0.644716	MF9A-3-BL	67	bettong		4.91	3.86	3.12	2.1925	15.7059	32.7	30.7872	15.1018
MF9A-3	912	81	62	16	0.941503	0.217827	0.205084	0.644716	MF9A-3-BL	68	bettong		4.91	3.86	3.12	2.1925	15.7059	32.7	30.7872	15.1018
MF9A-3	912	81	62	16	0.941503	0.217827	0.205084	0.644716	MF9A-3-BL	69	bettong		4.91	3.86	3.12	2.1925	15.7059	32.7	30.7872	15.1018
MF9A-3	912	81	62	16	0.941503	0.217827	0.205084	0.644716	MF9A-3-BL	70	bettong		4.91	3.86	3.12	2.1925	15.7059	32.7	30.7872	15.1018
MF9A-3	912	81	62	16	0.941503	0.217827	0.205084	0.644716	MF9A-3-BL	71	bettong		4.91	3.86	3.12	2.1925	15.7059	32.7	30.7872	15.1018
MF9A-3	912	81	62	16	0.941503	0.217827	0.205084	0.644716	MF9A-3-BL	72	bettong		4.91	3.86	3.12	2.1925	15.7059	32.7	30.7872	15.1018
MF9A-3	912	81	62	16	0.941503	0.217827	0.205084	0.644716	MF9A-3-BL	73	bettong		4.91	3.86	3.12	2.1925	15.7059	32.7	30.7872	15.1018
MF9A-3	912	81	62	16	0.941503	0.217827	0.205084	0.644716	MF9A-3-BL	74	bettong		4.91	3.86	3.12	2.1925	15.7059	32.7	30.7872	15.1018
MF9A-3	912	81	62	16	0.941503	0.217827	0.205084	0.644716	MF9A-3-BL	75	bettong		4.91	3.86	3.12	2.1925	15.7059	32.7	30.7872	15.1018
MF9A-3	912	81	62	16	0.941503	0.217827	0.205084	0.644716	MF9A-3-BL	76	bettong		4.91	3.86	3.12	2.1925	15.7059	32.7	30.7872	15.1018
MF9A-3	912	81	62	16	0.941503	0.217827	0.205084	0.644716	MF9A-3-BL	77	bettong		4.91	3.86	3.12	2.1925	15.7059	32.7	30.7872	15.1018
MF9A-3	912	81	62	16	0.941503	0.217827	0.205084	0.644716	MF9A-3-BL	78	bettong		4.91	3.86	3.12	2.1925	15.7059	32.7	30.7872	15.1018
MF9A-3	912	81	62	16	0.941503	0.217827	0.205084	0.644716	MF9A-3-BL	79	bettong		4.91	3.86	3.12	2.1925	15.7059	32.7	30.7872	15.1018
MF9A-3	912	81	62	16	0.941503	0.217827	0.205084	0.644716	MF9A-3-BL	80	bettong		4.91	3.86	3.12	2.1925	15.7059	32.7	30.7872	15.1018
MF9A-3	912	81	62	16	0.941503	0.217827	0.205084	0.644716	MF9A-3-BL	81	bettong		4.91	3.86	3.12	2.1925	15.7059	32.7	30.7872	15.1018
MF9A-3	913	31	30	0	0.956261	0.356055	0.340482	0.639147	MF9A-3-BR	1	unknown	bowl	17	13	6	7.5	353.429	606.83	580.287	176.715
MF9A-3	913	31	30	0	0.956261	0.356055	0.340482	0.639147	MF9A-3-BR	2	bettong	nose hole	3	3	6	1.5	14.1372	30.0332	28.7196	7.06858
MF9A-3	913	31	30	0	0.956261	0.356055	0.340482	0.639147	MF9A-3-BR	3	bettong	nose hole	5	5	3	2.5	19.635	39.3794	37.657	19.635
MF9A-3	913	31	30	0	0.956261	0.356055	0.340482	0.639147	MF9A-3-BR	4	bettong	nose hole	4	4	4	2	16.7552	34.4838	32.9755	12.5664
MF9A-3	913	31	30	0	0.956261	0.356055	0.340482	0.639147	MF9A-3-BR	5	bettong	nose hole	5	4	4	2.25	21.2058	42.0498	40.2106	15.9043
MF9A-3	913	31	30	0	0.956261	0.356055	0.340482	0.639147	MF9A-3-BR	6	bettong	nose hole	5	4	6	2.25	31.8086	60.0747	57.4471	15.9043
MF9A-3	913	31	30	0	0.956261	0.356055	0.340482	0.639147	MF9A-3-BR	7	bettong	nose hole	6	5	6	2.75	47.5166	86.7782	82.9826	23.7583
MF9A-3	913	31	30	0	0.956261	0.356055	0.340482	0.639147	MF9A-3-BR	8	bettong	nose hole	5	3	3	2	12.5664	27.3628	26.166	12.5664
MF9A-3	913	31	30	0	0.956261	0.356055	0.340482	0.639147	MF9A-3-BR	9	bettong	nose hole	5	3.5	4	2.125	18.915	38.1555	36.4866	14.1863
MF9A-3	913	31	30	0	0.956261	0.356055	0.340482	0.639147	MF9A-3-BR	10	bettong	nose hole	8	6	5	3.5	64.1409	115.039	110.008	38.4845
MF9A-3	913	31	30	0	0.956261	0.356055	0.340482	0.639147	MF9A-3-BR	11	bettong	nose hole	5	5	5	2.5	32.7249	61.6324	58.9366	19.635
MF9A-3	913	31	30	0	0.956261	0.356055	0.340482	0.639147	MF9A-3-BR	12	bettong	nose hole	6	5	5	2.75	39.5972	73.3152	70.1084	23.7583
MF9A-3	913	31	30	0	0.956261	0.356055	0.340482	0.639147	MF9A-3-BR	13	bettong	root	8	3	1.5	2.75	11.8791	26.1946	25.0488	23.7583
MF9A-3	913	31	30	0	0.956261	0.356055	0.340482	0.639147	MF9A-3-BR	14	bettong	nose hole	5	3	3	2	12.5664	27.3628	26.166	12.5664
MF9A-3	913	31	30	0	0.956261	0.356055	0.340482	0.639147	MF9A-3-BR	15	bettong	scratch	4	3	1	1.75	3.20704	11.452	10.9511	9.62113
MF9A-3	913	31	30	0	0.956261	0.356055	0.340482	0.639147	MF9A-3-BR	16	bettong	nose hole	7	5	4	3	37.6991	70.0885	67.0229	28.2743
MF9A-3	913	31	30	0	0.956261	0.356055	0.340482	0.639147	MF9A-3-BR	17	bettong	nose hole	3	3	3	1.5	7.06858	18.0166	17.2286	7.06858
MF9A-3	913	31	30	0	0.956261	0.356055	0.340482	0.639147	MF9A-3-BR	18	bettong	bowl	7	6	2	3.25	22.122	43.6075	41.7001	33.1831
MF9A-3	913	31	30	0	0.956261	0.356055	0.340482	0.639147	MF9A-3-BR	19	bettong	nose hole	4	3.5	2	1.875	7.36311	18.5173	17.7074	11.0447
MF9A-3	913	31	30	0	0.956261	0.356055	0.340482	0.639147	MF9A-3-BR	20	bettong	nose hole	5	4	2	2.25	10.6029	24.0249	22.9741	15.9043
MF9A-3	913	31	30	0	0.956261	0.356055	0.340482	0.639147	MF9A-3-BR	21	bettong		4.91	3.86	3.12	2.1925	15.7059	32.7	31.2697	15.1018
MF9A-3	913	31	30	0	0.956261	0.356055	0.340482	0.639147	MF9A-3-BR	22	bettong		4.91	3.86	3.12	2.1925	15.7059	32.7	31.2697	15.1018
MF9A-3	913	31	30	0	0.956261	0.356055	0.340482	0.639147	MF9A-3-BR	23	bettong		4.91	3.86	3.12	2.1925	15.7059	32.7	31.2697	15.1018
MF9A-3	913	31	30	0	0.956261	0.356055	0.340482	0.639147	MF9A-3-BR	24	bettong		4.91	3.86	3.12	2.1925	15.7059	32.7	31.2697	15.1018
MF9A-3	913	31	30	0	0.956261	0.356055	0.340482	0.639147	MF9A-3-BR	25	bettong		4.91	3.86	3.12	2.1925	15.7059	32.7	31.2697	15.1018
MF9A-3	913	31	30	0	0.956261	0.356055	0.340482	0.639147	MF9A-3-BR	26	bettong		4.91	3.86	3.12	2.1925	15.7059	32.7	31.2697	15.1018
MF9A-3	913	31	30	0	0.956261	0.356055	0.340482	0.639147	MF9A-3-BR	27	bettong		4.91	3.86	3.12	2.1925	15.7059	32.7	31.2697	15.1018
MF9A-3	913	31	30	0	0.956261	0.356055	0.340482	0.639147	MF9A-3-BR	28	bettong		4.91	3.86	3.12	2.1925	15.7059	32.7	31.2697	15.1018
MF9A-3	913	31	30	0	0.956261	0.356055	0.340482	0.639147	MF9A-3-BR	29	bettong		4.91	3.86	3.12	2.1925	15.7059	32.7	31.2697	15.1018
MF9A-3	913	31	30	0	0.956261	0.356055	0.340482	0.639147	MF9A-3-BR	30	bettong		4.91	3.86	3.12	2.1925	15.7059	32.7	31.2697	15.1018
MF9A-3	913	31	30	0	0.956261	0.356055	0.340482	0.639147	MF9A-3-BR	31	bettong		4.91	3.86	3.12	2.1925	15.7059	32.7	31.2697	15.1018
MF9A-3	914	54	40	8	0.860592	0.143067	0.123123	0.675248	MF9A-3-AR	1	bettong	nose hole	7	4	4	2.75	31.6777	59.8521	51.5083	23.7583
MF9A-3	914	54	40	8	0.860592	0.143067	0.123123	0.675248	MF9A-3-AR	2	bettong	nose hole	5	5	4	2.5	26.1799	50.5059	43.465	19.635
MF9A-3	914	54	40	8	0.860592	0.143067	0.123123	0.675248	MF9A-3-AR	3	bettong	nose hole	4	3.5	4	1.875	14.7262	31.0346	26.7081	11.0447
MF9A-3	914	54	40	8	0.860592	0.143067	0.123123	0.675248	MF9A-3-AR	4	bettong	nose hole	5	3	1.5	2	6.28319	16.6814	14.3559	12.5664
MF9A-3	914	54	40	8	0.860592	0.143067	0.123123	0.675248	MF9A-3-AR	5	unknown	scratch	4.5	4.5	1	2.25	5.30144	15.0124	12.9196	15.9043
MF9A-3	914	54	40	8	0.860592	0.143067	0.123123	0.675248	MF9A-3-AR	6	rabbit	scratch	15	13	1	7	51.3127	93.2316	80.2343	153.938
MF9A-3	914	54	40	8	0.860592	0.143067	0.123123	0.675248	MF9A-3-AR	7	bettong	nose hole	4.5	3	1	1.875	3.68155	12.2586	10.5497	11.0447
MF9A-3	914	54	40	8	0.860592	0.143067	0.123123	0.675248	MF9A-3-AR	8	rabbit	scratch	7	7	1	3.5	12.8282	27.8079	23.9312	38.4845
MF9A-3	914	54	40	8	0.860592	0.143067	0.123123	0.675248	MF9A-3-AR	9	bettong	nose hole	7	5	4	3	37.6991	70.0885	60.3176	28.2743
MF9A-3	914	54	40	8	0.860592	0.143067	0.123123	0.675248	MF9A-3-AR	10	unknown	scratch	7	6	1	3.25	11.061	24.8037	21.3459	33.1831
MF9A-3	914	54	40	8	0.860592	0.143067	0.123123	0.675248	MF9A-3-AR	11	bettong	scratch	4	2	1	1.5	2.35619	10.0055	8.61068	7.06858
MF9A-3	914	54	40	8	0.860592	0.143067	0.123123	0.675248	MF9A-3-AR	12	bettong	nose hole	4	3	2	1.75	6.41409	16.9039	14.5474	9.62113
MF9A-3	914	54	40	8	0.860592	0.143067	0.123123	0.675248	MF9A-3-AR	13	bettong	nose hole	6	5	6	2.75	47.5166	86.7782	74.6806	23.7583
MF9A-3	914	54	40	8	0.860592	0.143067	0.123123	0.675248	MF9A-3-AR	14	bettong	nose hole	7	5	5	3	47.1239	86.1106	74.1061	28.2743
MF9A-3	914	54	40	8	0.860592	0.143067	0.123123	0.675248	MF9A-3-AR	15	bettong	nose hole	4	3	4	1.75	12.8282	27.8079	23.9312	9.62113
MF9A-3	914	54	40	8	0.860592	0.143067	0.123123	0.675248	MF9A-3-AR	16	bettong	leaning cone	6	4	5	2.5	32.7249	61.6324	53.0403	19.635
MF9A-3	914	54	40	8	0.860592	0.143067	0.123123	0.675248	MF9A-3-AR	17	unknown	scratch	2.5	2	0.5	1.125	0.66268	7.12656	6.13306	3.97608
MF9A-3	914	54	40	8	0.860592	0.143067	0.123123	0.675248	MF9A-3-AR	18	bettong	nose hole	5	4	3	2.25	15.9043	33.0373	28.4317	15.9043
MF9A-3	914	54	40	8	0.860592	0.143067	0.123123	0.675248	MF9A-3-AR	19	bettong	nose hole	7	5	3	3	28.2743	54.0664	46.5291	28.2743
MF9A-3	914	54	40	8	0.860592	0.143067	0.123123	0.675248	MF9A-3-AR	20	bettong	nose hole	7	5	4	3	37.6991	70.0885	60.3176	28.2743
MF9A-3	914	54	40	8	0.860592	0.143067	0.123123	0.675248	MF9A-3-AR	21	unknown		7.19	4.91	1.65	3.025	15.8111	32.8789	28.2954	28.7475
MF9A-3	914	54	40	8	0.860592	0.143067	0.123123	0.675248	MF9A-3-AR	22	unknown		7.19	4.91	1.65	3.025	15.8111	32.8789	28.2954	28.7475
MF9A-3	914	54	40	8	0.860592	0.143067	0.123123	0.675248	MF9A-3-AR	23	unknown		7.19	4.91	1.65	3.025	15.8111	32.8789	28.2954	28.7475
MF9A-3	914	54	40	8	0.860592	0.143067	0.123123	0.675248	MF9A-3-AR	24	rabbit		9.95	6.14	2.16	4.0225	36.5994	68.2191	58.7088	50.8326
MF9A-3	914	54	40	8	0.860592	0.143067	0.123123	0.675248	MF9A-3-AR	25	rabbit		9.95	6.14	2.16	4.0225	36.5994	68.2191	58.7088	50.8326
MF9A-3	914	54	40	8	0.860592	0.143067	0.123123	0.675248	MF9A-3-AR	26	rabbit		9.95	6.14	2.16	4.0225	36.5994	68.2191	58.7088	50.8326
MF9A-3	914	54	40	8	0.860592	0.143067	0.123123	0.675248	MF9A-3-AR	27	rabbit		9.95	6.14	2.16	4.0225	36.5994	68.2191	58.7088	50.8326
MF9A-3	914	54	40	8	0.860592	0.143067	0.123123	0.675248	MF9A-3-AR	28	rabbit		9.95	6.14	2.16	4.0225	36.5994	68.2191	58.7088	50.8326
MF9A-3	914	54	40	8	0.860592	0.143067	0.123123	0.675248	MF9A-3-AR	29	rabbit		9.95	6.14	2.16	4.0225	36.5994	68.2191	58.7088	50.8326
MF9A-3	914	54	40	8	0.860592	0.143067	0.123123	0.675248	MF9A-3-AR	30	bettong		4.91	3.86	3.12	2.1925	15.7059	32.7	28.1414	15.1018
MF9A-3	914	54	40	8	0.860592	0.143067	0.123123	0.675248	MF9A-3-AR	31	bettong		4.91	3.86	3.12	2.1925	15.7059	32.7	28.1414	15.1018
MF9A-3	914	54	40	8	0.860592	0.143067	0.123123	0.675248	MF9A-3-AR	32	bettong		4.91	3.86	3.12	2.1925	15.7059	32.7	28.1414	15.1018
MF9A-3	914	54	40	8	0.860592	0.143067	0.123123	0.675248	MF9A-3-AR	33	bettong		4.91	3.86	3.12	2.1925	15.7059	32.7	28.1414	15.1018
MF9A-3	914	54	40	8	0.860592	0.143067	0.123123	0.675248	MF9A-3-AR	34	bettong		4.91	3.86	3.12	2.1925	15.7059	32.7	28.1414	15.1018
MF9A-3	914	54	40	8	0.860592	0.143067	0.123123	0.675248	MF9A-3-AR	35	bettong		4.91	3.86	3.12	2.1925	15.7059	32.7	28.1414	15.1018
MF9A-3	914	54	40	8	0.860592	0.143067	0.123123	0.675248	MF9A-3-AR	36	bettong		4.91	3.86	3.12	2.1925	15.7059	32.7	28.1414	15.1018
MF9A-3	914	54	40	8	0.860592	0.143067	0.123123	0.675248	MF9A-3-AR	37	bettong		4.91	3.86	3.12	2.1925	15.7059	32.7	28.1414	15.1018
MF9A-3	914	54	40	8	0.860592	0.143067	0.123123	0.675248	MF9A-3-AR	38	bettong		4.91	3.86	3.12	2.1925	15.7059	32.7	28.1414	15.1018
MF9A-3	914	54	40	8	0.860592	0.143067	0.123123	0.675248	MF9A-3-AR	39	bettong		4.91	3.86	3.12	2.1925	15.7059	32.7	28.1414	15.1018
MF9A-3	914	54	40	8	0.860592	0.143067	0.123123	0.675248	MF9A-3-AR	40	bettong		4.91	3.86	3.12	2.1925	15.7059	32.7	28.1414	15.1018
MF9A-3	914	54	40	8	0.860592	0.143067	0.123123	0.675248	MF9A-3-AR	41	bettong		4.91	3.86	3.12	2.1925	15.7059	32.7	28.1414	15.1018
MF9A-3	914	54	40	8	0.860592	0.143067	0.123123	0.675248	MF9A-3-AR	42	bettong		4.91	3.86	3.12	2.1925	15.7059	32.7	28.1414	15.1018
MF9A-3	914	54	40	8	0.860592	0.143067	0.123123	0.675248	MF9A-3-AR	43	bettong		4.91	3.86	3.12	2.1925	15.7059	32.7	28.1414	15.1018
MF9A-3	914	54	40	8	0.860592	0.143067	0.123123	0.675248	MF9A-3-AR	44	bettong		4.91	3.86	3.12	2.1925	15.7059	32.7	28.1414	15.1018
MF9A-3	914	54	40	8	0.860592	0.143067	0.123123	0.675248	MF9A-3-AR	45	bettong		4.91	3.86	3.12	2.1925	15.7059	32.7	28.1414	15.1018
MF9A-3	914	54	40	8	0.860592	0.143067	0.123123	0.675248	MF9A-3-AR	46	bettong		4.91	3.86	3.12	2.1925	15.7059	32.7	28.1414	15.1018
MF9A-3	914	54	40	8	0.860592	0.143067	0.123123	0.675248	MF9A-3-AR	47	bettong		4.91	3.86	3.12	2.1925	15.7059	32.7	28.1414	15.1018
MF9A-3	914	54	40	8	0.860592	0.143067	0.123123	0.675248	MF9A-3-AR	48	bettong		4.91	3.86	3.12	2.1925	15.7059	32.7	28.1414	15.1018
MF9A-3	914	54	40	8	0.860592	0.143067	0.123123	0.675248	MF9A-3-AR	49	bettong		4.91	3.86	3.12	2.1925	15.7059	32.7	28.1414	15.1018
MF9A-3	914	54	40	8	0.860592	0.143067	0.123123	0.675248	MF9A-3-AR	50	bettong		4.91	3.86	3.12	2.1925	15.7059	32.7	28.1414	15.1018
MF9A-3	914	54	40	8	0.860592	0.143067	0.123123	0.675248	MF9A-3-AR	51	bettong		4.91	3.86	3.12	2.1925	15.7059	32.7	28.1414	15.1018
MF9A-3	914	54	40	8	0.860592	0.143067	0.123123	0.675248	MF9A-3-AR	52	bettong		4.91	3.86	3.12	2.1925	15.7059	32.7	28.1414	15.1018
MF9A-3	914	54	40	8	0.860592	0.143067	0.123123	0.675248	MF9A-3-AR	53	bettong		4.91	3.86	3.12	2.1925	15.7059	32.7	28.1414	15.1018
MF9A-3	914	54	40	8	0.860592	0.143067	0.123123	0.675248	MF9A-3-AR	54	bettong		4.91	3.86	3.12	2.1925	15.7059	32.7	28.1414	15.1018
MF9A-3	915	51	39	2	1.13662	0.269473	0.306288	0.571088	MF9A-3-AL	1	bettong	nose hole	8	6	6	3.5	76.969	136.847	155.543	38.4845
MF9A-3	915	51	39	2	1.13662	0.269473	0.306288	0.571088	MF9A-3-AL	2	bettong	scratch	30	14	2	11	253.422	436.817	496.494	380.133
MF9A-3	915	51	39	2	1.13662	0.269473	0.306288	0.571088	MF9A-3-AL	3	unknown	scratch	13	6	0.5	4.75	11.8137	26.0833	29.6467	70.8822
MF9A-3	915	51	39	2	1.13662	0.269473	0.306288	0.571088	MF9A-3-AL	4	unknown	bowl	17	7	4	6	150.796	262.354	298.196	113.097
MF9A-3	915	51	39	2	1.13662	0.269473	0.306288	0.571088	MF9A-3-AL	5	unknown	scratch	5	4	1	2.25	5.30144	15.0124	17.0634	15.9043
MF9A-3	915	51	39	2	1.13662	0.269473	0.306288	0.571088	MF9A-3-AL	6	bettong	nose hole	6	5	4	2.75	31.6777	59.8521	68.029	23.7583
MF9A-3	915	51	39	2	1.13662	0.269473	0.306288	0.571088	MF9A-3-AL	7	bettong	nose hole	7	5	3	3	28.2743	54.0664	61.4528	28.2743
MF9A-3	915	51	39	2	1.13662	0.269473	0.306288	0.571088	MF9A-3-AL	8	bettong	nose hole	4	3	3	1.75	9.62113	22.3559	25.4101	9.62113
MF9A-3	915	51	39	2	1.13662	0.269473	0.306288	0.571088	MF9A-3-AL	9	bettong	nose hole	6	5	4	2.75	31.6777	59.8521	68.029	23.7583
MF9A-3	915	51	39	2	1.13662	0.269473	0.306288	0.571088	MF9A-3-AL	10	unknown	bowl	7	5	2	3	18.8496	38.0442	43.2417	28.2743
MF9A-3	915	51	39	2	1.13662	0.269473	0.306288	0.571088	MF9A-3-AL	11	bettong	nose hole	4	4	4	2	16.7552	34.4838	39.1948	12.5664
MF9A-3	915	51	39	2	1.13662	0.269473	0.306288	0.571088	MF9A-3-AL	12	bettong	nose hole	4	3	2	1.75	6.41409	16.9039	19.2133	9.62113
MF9A-3	915	51	39	2	1.13662	0.269473	0.306288	0.571088	MF9A-3-AL	13	bettong	nose hole	5	5	2	2.5	13.09	28.2529	32.1128	19.635
MF9A-3	915	51	39	2	1.13662	0.269473	0.306288	0.571088	MF9A-3-AL	14	bettong	nose hole	5	5	3	2.5	19.635	39.3794	44.7593	19.635
MF9A-3	915	51	39	2	1.13662	0.269473	0.306288	0.571088	MF9A-3-AL	15	bettong	nose hole	6	5	4	2.75	31.6777	59.8521	68.029	23.7583
MF9A-3	915	51	39	2	1.13662	0.269473	0.306288	0.571088	MF9A-3-AL	16	bettong	nose hole	4	3	3	1.75	9.62113	22.3559	25.4101	9.62113
MF9A-3	915	51	39	2	1.13662	0.269473	0.306288	0.571088	MF9A-3-AL	17	unknown	scratch	6	5	2	2.75	15.8389	32.9261	37.4243	23.7583
MF9A-3	915	51	39	2	1.13662	0.269473	0.306288	0.571088	MF9A-3-AL	18	bettong	nose hole	8	7	5	3.75	73.6311	131.173	149.093	44.1786
MF9A-3	915	51	39	2	1.13662	0.269473	0.306288	0.571088	MF9A-3-AL	19	bettong	nose hole	4	4	3	2	12.5664	27.3628	31.1011	12.5664
MF9A-3	915	51	39	2	1.13662	0.269473	0.306288	0.571088	MF9A-3-AL	20	bettong	nose hole	4	4	2	2	8.37758	20.2419	23.0073	12.5664
MF9A-3	915	51	39	2	1.13662	0.269473	0.306288	0.571088	MF9A-3-AL	21	unknown		7.19	4.91	1.65	3.025	15.8111	32.8789	37.3708	28.7475
MF9A-3	915	51	39	2	1.13662	0.269473	0.306288	0.571088	MF9A-3-AL	22	unknown		7.19	4.91	1.65	3.025	15.8111	32.8789	37.3708	28.7475
MF9A-3	915	51	39	2	1.13662	0.269473	0.306288	0.571088	MF9A-3-AL	23	unknown		7.19	4.91	1.65	3.025	15.8111	32.8789	37.3708	28.7475
MF9A-3	915	51	39	2	1.13662	0.269473	0.306288	0.571088	MF9A-3-AL	24	unknown		7.19	4.91	1.65	3.025	15.8111	32.8789	37.3708	28.7475
MF9A-3	915	51	39	2	1.13662	0.269473	0.306288	0.571088	MF9A-3-AL	25	unknown		7.19	4.91	1.65	3.025	15.8111	32.8789	37.3708	28.7475
MF9A-3	915	51	39	2	1.13662	0.269473	0.306288	0.571088	MF9A-3-AL	26	rabbit		9.95	6.14	2.16	4.0225	36.5994	68.2191	77.5389	50.8326
MF9A-3	915	51	39	2	1.13662	0.269473	0.306288	0.571088	MF9A-3-AL	27	rabbit		9.95	6.14	2.16	4.0225	36.5994	68.2191	77.5389	50.8326
MF9A-3	915	51	39	2	1.13662	0.269473	0.306288	0.571088	MF9A-3-AL	28	bettong		4.91	3.86	3.12	2.1925	15.7059	32.7	37.1674	15.1018
MF9A-3	915	51	39	2	1.13662	0.269473	0.306288	0.571088	MF9A-3-AL	29	bettong		4.91	3.86	3.12	2.1925	15.7059	32.7	37.1674	15.1018
MF9A-3	915	51	39	2	1.13662	0.269473	0.306288	0.571088	MF9A-3-AL	30	bettong		4.91	3.86	3.12	2.1925	15.7059	32.7	37.1674	15.1018
MF9A-3	915	51	39	2	1.13662	0.269473	0.306288	0.571088	MF9A-3-AL	31	bettong		4.91	3.86	3.12	2.1925	15.7059	32.7	37.1674	15.1018
MF9A-3	915	51	39	2	1.13662	0.269473	0.306288	0.571088	MF9A-3-AL	32	bettong		4.91	3.86	3.12	2.1925	15.7059	32.7	37.1674	15.1018
MF9A-3	915	51	39	2	1.13662	0.269473	0.306288	0.571088	MF9A-3-AL	33	bettong		4.91	3.86	3.12	2.1925	15.7059	32.7	37.1674	15.1018
MF9A-3	915	51	39	2	1.13662	0.269473	0.306288	0.571088	MF9A-3-AL	34	bettong		4.91	3.86	3.12	2.1925	15.7059	32.7	37.1674	15.1018
MF9A-3	915	51	39	2	1.13662	0.269473	0.306288	0.571088	MF9A-3-AL	35	bettong		4.91	3.86	3.12	2.1925	15.7059	32.7	37.1674	15.1018
MF9A-3	915	51	39	2	1.13662	0.269473	0.306288	0.571088	MF9A-3-AL	36	bettong		4.91	3.86	3.12	2.1925	15.7059	32.7	37.1674	15.1018
MF9A-3	915	51	39	2	1.13662	0.269473	0.306288	0.571088	MF9A-3-AL	37	bettong		4.91	3.86	3.12	2.1925	15.7059	32.7	37.1674	15.1018
MF9A-3	915	51	39	2	1.13662	0.269473	0.306288	0.571088	MF9A-3-AL	38	bettong		4.91	3.86	3.12	2.1925	15.7059	32.7	37.1674	15.1018
MF9A-3	915	51	39	2	1.13662	0.269473	0.306288	0.571088	MF9A-3-AL	39	bettong		4.91	3.86	3.12	2.1925	15.7059	32.7	37.1674	15.1018
MF9A-3	915	51	39	2	1.13662	0.269473	0.306288	0.571088	MF9A-3-AL	40	bettong		4.91	3.86	3.12	2.1925	15.7059	32.7	37.1674	15.1018
MF9A-3	915	51	39	2	1.13662	0.269473	0.306288	0.571088	MF9A-3-AL	41	bettong		4.91	3.86	3.12	2.1925	15.7059	32.7	37.1674	15.1018
MF9A-3	915	51	39	2	1.13662	0.269473	0.306288	0.571088	MF9A-3-AL	42	bettong		4.91	3.86	3.12	2.1925	15.7059	32.7	37.1674	15.1018
MF9A-3	915	51	39	2	1.13662	0.269473	0.306288	0.571088	MF9A-3-AL	43	bettong		4.91	3.86	3.12	2.1925	15.7059	32.7	37.1674	15.1018
MF9A-3	915	51	39	2	1.13662	0.269473	0.306288	0.571088	MF9A-3-AL	44	bettong		4.91	3.86	3.12	2.1925	15.7059	32.7	37.1674	15.1018
MF9A-3	915	51	39	2	1.13662	0.269473	0.306288	0.571088	MF9A-3-AL	45	bettong		4.91	3.86	3.12	2.1925	15.7059	32.7	37.1674	15.1018
MF9A-3	915	51	39	2	1.13662	0.269473	0.306288	0.571088	MF9A-3-AL	46	bettong		4.91	3.86	3.12	2.1925	15.7059	32.7	37.1674	15.1018
MF9A-3	915	51	39	2	1.13662	0.269473	0.306288	0.571088	MF9A-3-AL	47	bettong		4.91	3.86	3.12	2.1925	15.7059	32.7	37.1674	15.1018
MF9A-3	915	51	39	2	1.13662	0.269473	0.306288	0.571088	MF9A-3-AL	48	bettong		4.91	3.86	3.12	2.1925	15.7059	32.7	37.1674	15.1018
MF9A-3	915	51	39	2	1.13662	0.269473	0.306288	0.571088	MF9A-3-AL	49	bettong		4.91	3.86	3.12	2.1925	15.7059	32.7	37.1674	15.1018
MF9A-3	915	51	39	2	1.13662	0.269473	0.306288	0.571088	MF9A-3-AL	50	bettong		4.91	3.86	3.12	2.1925	15.7059	32.7	37.1674	15.1018
MF9A-3	915	51	39	2	1.13662	0.269473	0.306288	0.571088	MF9A-3-AL	51	bettong		4.91	3.86	3.12	2.1925	15.7059	32.7	37.1674	15.1018
MF9A-4	952	24	22	2	0.847376	0.511805	0.433692	0.680235	MF9A-4-AL	1	bettong	nose hole	5	3.5	1.5	2.125	7.09313	18.0583	15.3022	14.1863
MF9A-4	952	24	22	2	0.847376	0.511805	0.433692	0.680235	MF9A-4-AL	2	bettong	bowl	6	5	2.5	2.75	19.7986	39.6576	33.6049	23.7583
MF9A-4	952	24	22	2	0.847376	0.511805	0.433692	0.680235	MF9A-4-AL	3	bettong	root	6	4.5	3	2.625	21.6475	42.8008	36.2684	21.6475
MF9A-4	952	24	22	2	0.847376	0.511805	0.433692	0.680235	MF9A-4-AL	4	bettong	nose hole	7	4	3.5	2.75	27.718	53.1206	45.0131	23.7583
MF9A-4	952	24	22	2	0.847376	0.511805	0.433692	0.680235	MF9A-4-AL	5	rabbit	scratch	13	8	1	5.25	28.8634	55.0678	46.6631	86.5901
MF9A-4	952	24	22	2	0.847376	0.511805	0.433692	0.680235	MF9A-4-AL	6	bettong	nose hole	4	3.5	3	1.875	11.0447	24.7759	20.9945	11.0447
MF9A-4	952	24	22	2	0.847376	0.511805	0.433692	0.680235	MF9A-4-AL	7	bettong	nose hole	6	4.5	3	2.625	21.6475	42.8008	36.2684	21.6475
MF9A-4	952	24	22	2	0.847376	0.511805	0.433692	0.680235	MF9A-4-AL	8	bettong	nose hole	4	3	3.5	1.75	11.2246	25.0819	21.2538	9.62113
MF9A-4	952	24	22	2	0.847376	0.511805	0.433692	0.680235	MF9A-4-AL	9	bettong	nose hole	4.5	4	3	2.125	14.1863	30.1166	25.5201	14.1863
MF9A-4	952	24	22	2	0.847376	0.511805	0.433692	0.680235	MF9A-4-AL	10	bettong	bowl	6	4	2	2.5	13.09	28.2529	23.9409	19.635
MF9A-4	952	24	22	2	0.847376	0.511805	0.433692	0.680235	MF9A-4-AL	11	bettong	scratch	4	2	1.5	1.5	3.53429	12.0083	10.1755	7.06858
MF9A-4	952	24	22	2	0.847376	0.511805	0.433692	0.680235	MF9A-4-AL	12	bettong	nose hole	4	3	3	1.75	9.62113	22.3559	18.9439	9.62113
MF9A-4	952	24	22	2	0.847376	0.511805	0.433692	0.680235	MF9A-4-AL	13	bettong	scratch	5	3.5	1.5	2.125	7.09313	18.0583	15.3022	14.1863
MF9A-4	952	24	22	2	0.847376	0.511805	0.433692	0.680235	MF9A-4-AL	14	bettong	nose hole	5	4	3	2.25	15.9043	33.0373	27.995	15.9043
MF9A-4	952	24	22	2	0.847376	0.511805	0.433692	0.680235	MF9A-4-AL	15	bettong	nose hole	5	4.5	3.5	2.375	20.674	41.1457	34.8659	17.7205
MF9A-4	952	24	22	2	0.847376	0.511805	0.433692	0.680235	MF9A-4-AL	16	bettong	root	8	6	4	3.5	51.3127	93.2316	79.0022	38.4845
MF9A-4	952	24	22	2	0.847376	0.511805	0.433692	0.680235	MF9A-4-AL	17	rabbit	rabbit	12	6	2	4.5	42.4115	78.0996	66.1797	63.6173
MF9A-4	952	24	22	2	0.847376	0.511805	0.433692	0.680235	MF9A-4-AL	18	bettong	scratch	8	5	1	3.25	11.061	24.8037	21.0181	33.1831
MF9A-4	952	24	22	2	0.847376	0.511805	0.433692	0.680235	MF9A-4-AL	19	bettong	nose hole	5	5	4	2.5	26.1799	50.5059	42.7975	19.635
MF9A-4	952	24	22	2	0.847376	0.511805	0.433692	0.680235	MF9A-4-AL	20	bettong	nose hole	5	3	3	2	12.5664	27.3628	23.1866	12.5664
MF9A-4	952	24	22	2	0.847376	0.511805	0.433692	0.680235	MF9A-4-AL	21	bettong	nose hole	4	3	3	1.75	9.62113	22.3559	18.9439	9.62113
MF9A-4	952	24	22	2	0.847376	0.511805	0.433692	0.680235	MF9A-4-AL	22	bettong	nose hole	8	4	3	3	28.2743	54.0664	45.8146	28.2743
MF9A-4	952	24	22	2	0.847376	0.511805	0.433692	0.680235	MF9A-4-AL	23	bettong	nose hole	4	3	3	1.75	9.62113	22.3559	18.9439	9.62113
MF9A-4	952	24	22	2	0.847376	0.511805	0.433692	0.680235	MF9A-4-AL	24	bettong	nose hole	4	3	3	1.75	9.62113	22.3559	18.9439	9.62113
MF9A-4	953	16	13	1	1.09097	0.292499	0.319107	0.588314	MF9A-4-AR	1	bettong	nose hole	5.5	4	4	2.375	23.6274	46.1666	50.3663	17.7205
MF9A-4	953	16	13	1	1.09097	0.292499	0.319107	0.588314	MF9A-4-AR	2	bettong	bowl	7	6.5	3.5	3.375	41.7488	76.973	83.9752	35.7847
MF9A-4	953	16	13	1	1.09097	0.292499	0.319107	0.588314	MF9A-4-AR	3	bettong	scratch	7	6	1.5	3.25	16.5915	34.2056	37.3173	33.1831
MF9A-4	953	16	13	1	1.09097	0.292499	0.319107	0.588314	MF9A-4-AR	4	bettong	nose hole	6	4.5	5	2.625	36.0792	67.3347	73.4601	21.6475
MF9A-4	953	16	13	1	1.09097	0.292499	0.319107	0.588314	MF9A-4-AR	5	bettong	nose hole	6.5	4.5	4	2.75	31.6777	59.8521	65.2968	23.7583
MF9A-4	953	16	13	1	1.09097	0.292499	0.319107	0.588314	MF9A-4-AR	6	rabbit	bowl	10	8	4	4.5	84.823	150.199	163.863	63.6173
MF9A-4	953	16	13	1	1.09097	0.292499	0.319107	0.588314	MF9A-4-AR	7	bettong	nose hole	4	4	2	2	8.37758	20.2419	22.0833	12.5664
MF9A-4	953	16	13	1	1.09097	0.292499	0.319107	0.588314	MF9A-4-AR	8	bettong	nose hole	5.5	4.5	4	2.5	26.1799	50.5059	55.1004	19.635
MF9A-4	953	16	13	1	1.09097	0.292499	0.319107	0.588314	MF9A-4-AR	9	bettong	nose hole	5	5	3	2.5	19.635	39.3794	42.9617	19.635
MF9A-4	953	16	13	1	1.09097	0.292499	0.319107	0.588314	MF9A-4-AR	10	unknown	bowl	5.5	6	2	2.875	17.3115	35.4295	38.6525	25.9672
MF9A-4	953	16	13	1	1.09097	0.292499	0.319107	0.588314	MF9A-4-AR	11	bettong	nose hole	6	6	4	3	37.6991	70.0885	76.4644	28.2743
MF9A-4	953	16	13	1	1.09097	0.292499	0.319107	0.588314	MF9A-4-AR	12	unknown	nose hole	3	3	1.5	1.5	3.53429	12.0083	13.1007	7.06858
MF9A-4	953	16	13	1	1.09097	0.292499	0.319107	0.588314	MF9A-4-AR	13	bettong	nose hole	4.5	4.5	4	2.25	21.2058	42.0498	45.875	15.9043
MF9A-4	953	16	13	1	1.09097	0.292499	0.319107	0.588314	MF9A-4-AR	14	bettong	nose hole	6	5	4	2.75	31.6777	59.8521	65.2968	23.7583
MF9A-4	953	16	13	1	1.09097	0.292499	0.319107	0.588314	MF9A-4-AR	15	bettong	nose hole	5	6	3	2.75	23.7583	46.3891	50.6091	23.7583
MF9A-4	953	16	13	1	1.09097	0.292499	0.319107	0.588314	MF9A-4-AR	16	bettong	nose hole	4	4.5	2	2.125	9.4575	22.0778	24.0861	14.1863
MF9A-4	955	29	13	2	0.832562	0.125034	0.104098	0.685826	MF9A-4-BL	1	unknown	scratch	9	7	1	4	16.7552	34.4838	28.7099	50.2655
MF9A-4	955	29	13	2	0.832562	0.125034	0.104098	0.685826	MF9A-4-BL	2	bettong	nose hole	6	5	5	2.75	39.5972	73.3152	61.0394	23.7583
MF9A-4	955	29	13	2	0.832562	0.125034	0.104098	0.685826	MF9A-4-BL	3	bettong	nose hole	7	5	4	3	37.6991	70.0885	58.353	28.2743
MF9A-4	955	29	13	2	0.832562	0.125034	0.104098	0.685826	MF9A-4-BL	4	bettong	nose hole	3	3	1	1.5	2.35619	10.0055	8.33022	7.06858
MF9A-4	955	29	13	2	0.832562	0.125034	0.104098	0.685826	MF9A-4-BL	5	unknown	scratch	5	5	1	2.5	6.54498	17.1265	14.2588	19.635
MF9A-4	955	29	13	2	0.832562	0.125034	0.104098	0.685826	MF9A-4-BL	6	bettong	nose hole	8	5	4	3.25	44.2441	81.215	67.6165	33.1831
MF9A-4	955	29	13	2	0.832562	0.125034	0.104098	0.685826	MF9A-4-BL	7	rabbit	rabbit	7	5	2	3	18.8496	38.0442	31.6742	28.2743
MF9A-4	955	29	13	2	0.832562	0.125034	0.104098	0.685826	MF9A-4-BL	8	rabbit	rabbit	10	7	3	4.25	56.745	102.467	85.3097	56.745
MF9A-4	955	29	13	2	0.832562	0.125034	0.104098	0.685826	MF9A-4-BL	9	bettong	nose hole	6	5	5	2.75	39.5972	73.3152	61.0394	23.7583
MF9A-4	955	29	13	2	0.832562	0.125034	0.104098	0.685826	MF9A-4-BL	10	bird	nose hole	6	6	2	3	18.8496	38.0442	31.6742	28.2743
MF9A-4	955	29	13	2	0.832562	0.125034	0.104098	0.685826	MF9A-4-BL	11	bettong	nose hole	6	5	5	2.75	39.5972	73.3152	61.0394	23.7583
MF9A-4	955	29	13	2	0.832562	0.125034	0.104098	0.685826	MF9A-4-BL	12	bettong	nose hole	7	5	4.5	3	42.4115	78.0996	65.0227	28.2743
MF9A-4	955	29	13	2	0.832562	0.125034	0.104098	0.685826	MF9A-4-BL	13	unknown	bowl	5	4	2	2.25	10.6029	24.0249	20.0022	15.9043
MF9A-4	955	29	13	2	0.832562	0.125034	0.104098	0.685826	MF9A-4-BL	14	unknown	bowl	5	3	1.5	2	6.28319	16.6814	13.8883	12.5664
MF9A-4	955	29	13	2	0.832562	0.125034	0.104098	0.685826	MF9A-4-BL	15	unknown	bowl	7	5	3	3	28.2743	54.0664	45.0136	28.2743
MF9A-4	955	29	13	2	0.832562	0.125034	0.104098	0.685826	MF9A-4-BL	16	unknown	scratch	5	5	1	2.5	6.54498	17.1265	14.2588	19.635
MF9A-4	955	29	13	2	0.832562	0.125034	0.104098	0.685826	MF9A-4-BL	17	unknown	scratch	11	7	1	4.5	21.2058	42.0498	35.009	63.6173
MF9A-4	955	29	13	2	0.832562	0.125034	0.104098	0.685826	MF9A-4-BL	18	unknown	scratch	15	8	1	5.75	34.623	64.859	53.9992	103.869
MF9A-4	955	29	13	2	0.832562	0.125034	0.104098	0.685826	MF9A-4-BL	19	unknown	scratch	10	7	3	4.25	56.745	102.467	85.3097	56.745
MF9A-4	955	29	13	2	0.832562	0.125034	0.104098	0.685826	MF9A-4-BL	20	unknown	bowl	5	4	2	2.25	10.6029	24.0249	20.0022	15.9043
MF9A-4	955	29	13	2	0.832562	0.125034	0.104098	0.685826	MF9A-4-BL	21	unknown		7.19	4.91	1.65	3.025	15.8111	32.8789	27.3737	28.7475
MF9A-4	955	29	13	2	0.832562	0.125034	0.104098	0.685826	MF9A-4-BL	22	unknown		7.19	4.91	1.65	3.025	15.8111	32.8789	27.3737	28.7475
MF9A-4	955	29	13	2	0.832562	0.125034	0.104098	0.685826	MF9A-4-BL	23	unknown		7.19	4.91	1.65	3.025	15.8111	32.8789	27.3737	28.7475
MF9A-4	955	29	13	2	0.832562	0.125034	0.104098	0.685826	MF9A-4-BL	24	bettong		4.91	3.86	3.12	2.1925	15.7059	32.7	27.2248	15.1018
MF9A-4	955	29	13	2	0.832562	0.125034	0.104098	0.685826	MF9A-4-BL	25	bettong		4.91	3.86	3.12	2.1925	15.7059	32.7	27.2248	15.1018
MF9A-4	955	29	13	2	0.832562	0.125034	0.104098	0.685826	MF9A-4-BL	26	bettong		4.91	3.86	3.12	2.1925	15.7059	32.7	27.2248	15.1018
MF9A-4	955	29	13	2	0.832562	0.125034	0.104098	0.685826	MF9A-4-BL	27	bettong		4.91	3.86	3.12	2.1925	15.7059	32.7	27.2248	15.1018
MF9A-4	955	29	13	2	0.832562	0.125034	0.104098	0.685826	MF9A-4-BL	28	bettong		4.91	3.86	3.12	2.1925	15.7059	32.7	27.2248	15.1018
MF9A-4	955	29	13	2	0.832562	0.125034	0.104098	0.685826	MF9A-4-BL	29	bettong		4.91	3.86	3.12	2.1925	15.7059	32.7	27.2248	15.1018
MF9A-4	954	47	34	0	0.815782	0.347827	0.283751	0.692158	MF9A-4-BR	1	bettong	scratch	4	4	1	2	4.18879	13.1209	10.7038	12.5664
MF9A-4	954	47	34	0	0.815782	0.347827	0.283751	0.692158	MF9A-4-BR	2	bettong	nose hole	3	2.5	1	1.375	1.97986	9.36576	7.64041	5.93957
MF9A-4	954	47	34	0	0.815782	0.347827	0.283751	0.692158	MF9A-4-BR	3	bettong	nose hole	3.5	3	3	1.625	8.29577	20.1028	16.3995	8.29577
MF9A-4	954	47	34	0	0.815782	0.347827	0.283751	0.692158	MF9A-4-BR	4	bettong	nose hole	5	3	2	2	8.37758	20.2419	16.513	12.5664
MF9A-4	954	47	34	0	0.815782	0.347827	0.283751	0.692158	MF9A-4-BR	5	unknown	scratch	3	3	0.5	1.5	1.1781	8.00277	6.52851	7.06858
MF9A-4	954	47	34	0	0.815782	0.347827	0.283751	0.692158	MF9A-4-BR	6	unknown	scratch	3	2	0.5	1.25	0.818123	7.39081	6.02929	4.90874
MF9A-4	954	47	34	0	0.815782	0.347827	0.283751	0.692158	MF9A-4-BR	7	unknown	scratch	5	3	0.5	2	2.0944	9.56047	7.79926	12.5664
MF9A-4	954	47	34	0	0.815782	0.347827	0.283751	0.692158	MF9A-4-BR	8	bird	nose hole	5	4	2.5	2.25	13.2536	28.5311	23.2752	15.9043
MF9A-4	954	47	34	0	0.815782	0.347827	0.283751	0.692158	MF9A-4-BR	9	unknown	scratch	8	7	0	3.75	0	6	4.89469	44.1786
MF9A-4	954	47	34	0	0.815782	0.347827	0.283751	0.692158	MF9A-4-BR	10	bettong	nose hole	6	5	5	2.75	39.5972	73.3152	59.8092	23.7583
MF9A-4	954	47	34	0	0.815782	0.347827	0.283751	0.692158	MF9A-4-BR	11	unknown	bowl	9	8	4.5	4.25	85.1175	150.7	122.938	56.745
MF9A-4	954	47	34	0	0.815782	0.347827	0.283751	0.692158	MF9A-4-BR	12	unknown	scratch	5	2	1	1.75	3.20704	11.452	9.34231	9.62113
MF9A-4	954	47	34	0	0.815782	0.347827	0.283751	0.692158	MF9A-4-BR	13	bettong	nose hole	5	4	3	2.25	15.9043	33.0373	26.9512	15.9043
MF9A-4	954	47	34	0	0.815782	0.347827	0.283751	0.692158	MF9A-4-BR	14	bettong	nose hole	8	6	6	3.5	76.969	136.847	111.638	38.4845
MF9A-4	954	47	34	0	0.815782	0.347827	0.283751	0.692158	MF9A-4-BR	15	bettong	nose hole	6	5	5	2.75	39.5972	73.3152	59.8092	23.7583
MF9A-4	954	47	34	0	0.815782	0.347827	0.283751	0.692158	MF9A-4-BR	16	bettong	nose hole	4	4	4	2	16.7552	34.4838	28.1312	12.5664
MF9A-4	954	47	34	0	0.815782	0.347827	0.283751	0.692158	MF9A-4-BR	17	bettong	bowl	8	6	3	3.5	38.4845	71.4237	58.2661	38.4845
MF9A-4	954	47	34	0	0.815782	0.347827	0.283751	0.692158	MF9A-4-BR	18	bettong	nose hole	6	5	4	2.75	31.6777	59.8521	48.8263	23.7583
MF9A-4	954	47	34	0	0.815782	0.347827	0.283751	0.692158	MF9A-4-BR	19	bettong	nose hole	7	5	3	3	28.2743	54.0664	44.1063	28.2743
MF9A-4	954	47	34	0	0.815782	0.347827	0.283751	0.692158	MF9A-4-BR	20	unknown	scratch	3	2	0.5	1.25	0.818123	7.39081	6.02929	4.90874
MF9A-4	954	47	34	0	0.815782	0.347827	0.283751	0.692158	MF9A-4-BR	21	unknown		7.19	4.91	1.65	3.025	15.8111	32.8789	26.822	28.7475
MF9A-4	954	47	34	0	0.815782	0.347827	0.283751	0.692158	MF9A-4-BR	22	unknown		7.19	4.91	1.65	3.025	15.8111	32.8789	26.822	28.7475
MF9A-4	954	47	34	0	0.815782	0.347827	0.283751	0.692158	MF9A-4-BR	23	unknown		7.19	4.91	1.65	3.025	15.8111	32.8789	26.822	28.7475
MF9A-4	954	47	34	0	0.815782	0.347827	0.283751	0.692158	MF9A-4-BR	24	unknown		7.19	4.91	1.65	3.025	15.8111	32.8789	26.822	28.7475
MF9A-4	954	47	34	0	0.815782	0.347827	0.283751	0.692158	MF9A-4-BR	25	unknown		7.19	4.91	1.65	3.025	15.8111	32.8789	26.822	28.7475
MF9A-4	954	47	34	0	0.815782	0.347827	0.283751	0.692158	MF9A-4-BR	26	bettong		4.91	3.86	3.12	2.1925	15.7059	32.7	26.6761	15.1018
MF9A-4	954	47	34	0	0.815782	0.347827	0.283751	0.692158	MF9A-4-BR	27	bettong		4.91	3.86	3.12	2.1925	15.7059	32.7	26.6761	15.1018
MF9A-4	954	47	34	0	0.815782	0.347827	0.283751	0.692158	MF9A-4-BR	28	bettong		4.91	3.86	3.12	2.1925	15.7059	32.7	26.6761	15.1018
MF9A-4	954	47	34	0	0.815782	0.347827	0.283751	0.692158	MF9A-4-BR	29	bettong		4.91	3.86	3.12	2.1925	15.7059	32.7	26.6761	15.1018
MF9A-4	954	47	34	0	0.815782	0.347827	0.283751	0.692158	MF9A-4-BR	30	bettong		4.91	3.86	3.12	2.1925	15.7059	32.7	26.6761	15.1018
MF9A-4	954	47	34	0	0.815782	0.347827	0.283751	0.692158	MF9A-4-BR	31	bettong		4.91	3.86	3.12	2.1925	15.7059	32.7	26.6761	15.1018
MF9A-4	954	47	34	0	0.815782	0.347827	0.283751	0.692158	MF9A-4-BR	32	bettong		4.91	3.86	3.12	2.1925	15.7059	32.7	26.6761	15.1018
MF9A-4	954	47	34	0	0.815782	0.347827	0.283751	0.692158	MF9A-4-BR	33	bettong		4.91	3.86	3.12	2.1925	15.7059	32.7	26.6761	15.1018
MF9A-4	954	47	34	0	0.815782	0.347827	0.283751	0.692158	MF9A-4-BR	34	bettong		4.91	3.86	3.12	2.1925	15.7059	32.7	26.6761	15.1018
MF9A-4	954	47	34	0	0.815782	0.347827	0.283751	0.692158	MF9A-4-BR	35	bettong		4.91	3.86	3.12	2.1925	15.7059	32.7	26.6761	15.1018
MF9A-4	954	47	34	0	0.815782	0.347827	0.283751	0.692158	MF9A-4-BR	36	bettong		4.91	3.86	3.12	2.1925	15.7059	32.7	26.6761	15.1018
MF9A-4	954	47	34	0	0.815782	0.347827	0.283751	0.692158	MF9A-4-BR	37	bettong		4.91	3.86	3.12	2.1925	15.7059	32.7	26.6761	15.1018
MF9A-4	954	47	34	0	0.815782	0.347827	0.283751	0.692158	MF9A-4-BR	38	bettong		4.91	3.86	3.12	2.1925	15.7059	32.7	26.6761	15.1018
MF9A-4	954	47	34	0	0.815782	0.347827	0.283751	0.692158	MF9A-4-BR	39	bettong		4.91	3.86	3.12	2.1925	15.7059	32.7	26.6761	15.1018
MF9A-4	954	47	34	0	0.815782	0.347827	0.283751	0.692158	MF9A-4-BR	40	bettong		4.91	3.86	3.12	2.1925	15.7059	32.7	26.6761	15.1018
MF9A-4	954	47	34	0	0.815782	0.347827	0.283751	0.692158	MF9A-4-BR	41	bettong		4.91	3.86	3.12	2.1925	15.7059	32.7	26.6761	15.1018
MF9A-4	954	47	34	0	0.815782	0.347827	0.283751	0.692158	MF9A-4-BR	42	bettong		4.91	3.86	3.12	2.1925	15.7059	32.7	26.6761	15.1018
MF9A-4	954	47	34	0	0.815782	0.347827	0.283751	0.692158	MF9A-4-BR	43	bettong		4.91	3.86	3.12	2.1925	15.7059	32.7	26.6761	15.1018
MF9A-4	954	47	34	0	0.815782	0.347827	0.283751	0.692158	MF9A-4-BR	44	bettong		4.91	3.86	3.12	2.1925	15.7059	32.7	26.6761	15.1018
MF9A-4	954	47	34	0	0.815782	0.347827	0.283751	0.692158	MF9A-4-BR	45	bettong		4.91	3.86	3.12	2.1925	15.7059	32.7	26.6761	15.1018
MF9A-4	954	47	34	0	0.815782	0.347827	0.283751	0.692158	MF9A-4-BR	46	bettong		4.91	3.86	3.12	2.1925	15.7059	32.7	26.6761	15.1018
MF9A-4	954	47	34	0	0.815782	0.347827	0.283751	0.692158	MF9A-4-BR	47	bettong		4.91	3.86	3.12	2.1925	15.7059	32.7	26.6761	15.1018
MF11A-2	983	10	9	0	0.913356	0.097919	0.0894349	0.655337	MF11A-2-AL	1	unknown	bowl	10	9	2	4.75	47.2548	86.3331	78.8529	70.8822
MF11A-2	983	10	9	0	0.913356	0.097919	0.0894349	0.655337	MF11A-2-AL	2	bettong	nose hole	5	5	2	2.5	13.09	28.2529	25.805	19.635
MF11A-2	983	10	9	0	0.913356	0.097919	0.0894349	0.655337	MF11A-2-AL	3	bettong	nose hole	6	4	3	2.5	19.635	39.3794	35.9674	19.635
MF11A-2	983	10	9	0	0.913356	0.097919	0.0894349	0.655337	MF11A-2-AL	4	bettong	nose hole	4	4	2	2	8.37758	20.2419	18.488	12.5664
MF11A-2	983	10	9	0	0.913356	0.097919	0.0894349	0.655337	MF11A-2-AL	5	bettong	nose hole	4	4	3	2	12.5664	27.3628	24.992	12.5664
MF11A-2	983	10	9	0	0.913356	0.097919	0.0894349	0.655337	MF11A-2-AL	6	bettong	nose hole	4	3	2	1.75	6.41409	16.9039	15.4393	9.62113
MF11A-2	983	10	9	0	0.913356	0.097919	0.0894349	0.655337	MF11A-2-AL	7	bettong	nose hole	5	4	2.5	2.25	13.2536	28.5311	26.0591	15.9043
MF11A-2	983	10	9	0	0.913356	0.097919	0.0894349	0.655337	MF11A-2-AL	8	bettong	nose hole	6	5	3	2.75	23.7583	46.3891	42.3698	23.7583
MF11A-2	983	10	9	0	0.913356	0.097919	0.0894349	0.655337	MF11A-2-AL	9	bettong	nose hole	6	5	3	2.75	23.7583	46.3891	42.3698	23.7583
MF11A-2	983	10	9	0	0.913356	0.097919	0.0894349	0.655337	MF11A-2-AL	10	bettong	nose hole	7	4	3.5	2.75	27.718	53.1206	48.518	23.7583
MF11A-2	982	3	2	0	1.10626	0.199431	0.220622	0.582544	MF11A-2-AR	1	bettong	nose hole	4	4	3	2	12.5664	27.3628	30.2703	12.5664
MF11A-2	982	3	2	0	1.10626	0.199431	0.220622	0.582544	MF11A-2-AR	2	bettong	nose hole	5	4	3	2.25	15.9043	33.0373	36.5478	15.9043
MF11A-2	982	3	2	0	1.10626	0.199431	0.220622	0.582544	MF11A-2-AR	3	unknown	rabbit	11	7	2	4.5	42.4115	78.0996	86.3983	63.6173
MF11A-2	980	8	6	0	0.796018	0.622237	0.495312	0.699616	MF11A-2-BL	1	bettong	nose hole	4	3	2	1.75	6.41409	16.9039	13.4559	9.62113
MF11A-2	980	8	6	0	0.796018	0.622237	0.495312	0.699616	MF11A-2-BL	2	bettong	nose hole	7	6	3	3.25	33.1831	62.4112	49.6805	33.1831
MF11A-2	980	8	6	0	0.796018	0.622237	0.495312	0.699616	MF11A-2-BL	3	unknown	nose hole	3	2	1	1.25	1.63625	8.78162	6.99033	4.90874
MF11A-2	980	8	6	0	0.796018	0.622237	0.495312	0.699616	MF11A-2-BL	4	bettong	nose hole	7	6	4	3.25	44.2441	81.215	64.6486	33.1831
MF11A-2	980	8	6	0	0.796018	0.622237	0.495312	0.699616	MF11A-2-BL	5	bettong	nose hole	7	5	3	3	28.2743	54.0664	43.0378	28.2743
MF11A-2	980	8	6	0	0.796018	0.622237	0.495312	0.699616	MF11A-2-BL	6	unknown	bowl	4	3	1	1.75	3.20704	11.452	9.11598	9.62113
MF11A-2	980	8	6	0	0.796018	0.622237	0.495312	0.699616	MF11A-2-BL	7	bettong	nose hole	5	4	3	2.25	15.9043	33.0373	26.2983	15.9043
MF11A-2	980	8	6	0	0.796018	0.622237	0.495312	0.699616	MF11A-2-BL	8	bettong	nose hole	5	3	3	2	12.5664	27.3628	21.7813	12.5664
MF9A-2	952	1	0	0	0.945148	0.241512	0.228265	0.64334	MF9A-2-AL	1	echidna	bowl	17	14	8	7.75	503.178	861.403	814.154	188.692
MF9A-2	953	2	0	0	0.837403	0.165644	0.13871	0.683999	MF9A-2-AR	1	bird	nose hole	5	3	2.5	2	10.472	23.8024	19.9322	12.5664
MF9A-2	953	2	0	0	0.837403	0.165644	0.13871	0.683999	MF9A-2-AR	2	bird	nose hole	5	2.5	2	1.875	7.36311	18.5173	15.5064	11.0447
MF11A-1	985	84	84	0	0.771907	0.0846203	0.065319	0.708714	MF11A-1-AL	2	bettong	nose hole	3	3	2	1.5	4.71239	14.0111	10.8152	7.06858
MF11A-1	985	84	84	0	0.771907	0.0846203	0.065319	0.708714	MF11A-1-AL	3	bettong	nose hole	5	3	2	2	8.37758	20.2419	15.6249	12.5664
MF11A-1	985	84	84	0	0.771907	0.0846203	0.065319	0.708714	MF11A-1-AL	4	bettong	nose hole	4	3	2	1.75	6.41409	16.9039	13.0483	9.62113
MF11A-1	985	84	84	0	0.771907	0.0846203	0.065319	0.708714	MF11A-1-AL	5	bettong	nose hole	7	4	3.5	2.75	27.718	53.1206	41.0042	23.7583
MF11A-1	985	84	84	0	0.771907	0.0846203	0.065319	0.708714	MF11A-1-AL	6	bettong	nose hole	7	5	4	3	37.6991	70.0885	54.1018	28.2743
MF11A-1	985	84	84	0	0.771907	0.0846203	0.065319	0.708714	MF11A-1-AL	7	bettong	nose hole	4	4	3	2	12.5664	27.3628	21.1216	12.5664
MF11A-1	985	84	84	0	0.771907	0.0846203	0.065319	0.708714	MF11A-1-AL	8	bettong	nose hole	4	3	3	1.75	9.62113	22.3559	17.2567	9.62113
MF11A-1	985	84	84	0	0.771907	0.0846203	0.065319	0.708714	MF11A-1-AL	9	bettong	nose hole	4	3	2	1.75	6.41409	16.9039	13.0483	9.62113
MF11A-1	985	84	84	0	0.771907	0.0846203	0.065319	0.708714	MF11A-1-AL	10	bettong	nose hole	4	3	2	1.75	6.41409	16.9039	13.0483	9.62113
MF11A-1	985	84	84	0	0.771907	0.0846203	0.065319	0.708714	MF11A-1-AL	11	bettong	scratch	4	3	0.5	1.75	1.60352	8.72599	6.73565	9.62113
MF11A-1	985	84	84	0	0.771907	0.0846203	0.065319	0.708714	MF11A-1-AL	12	bettong	nose hole	4	3.5	3	1.875	11.0447	24.7759	19.1247	11.0447
MF11A-1	985	84	84	0	0.771907	0.0846203	0.065319	0.708714	MF11A-1-AL	13	bettong	nose hole	5	4	4	2.25	21.2058	42.0498	32.4585	15.9043
MF11A-1	985	84	84	0	0.771907	0.0846203	0.065319	0.708714	MF11A-1-AL	14	bettong	nose hole	5	4	3	2.25	15.9043	33.0373	25.5018	15.9043
MF11A-1	985	84	84	0	0.771907	0.0846203	0.065319	0.708714	MF11A-1-AL	15	bettong	nose hole	5	3.5	2.5	2.125	11.8219	26.0972	20.1446	14.1863
MF11A-1	985	84	84	0	0.771907	0.0846203	0.065319	0.708714	MF11A-1-AL	16	bettong	nose hole	3	3	2	1.5	4.71239	14.0111	10.8152	7.06858
MF11A-1	985	84	84	0	0.771907	0.0846203	0.065319	0.708714	MF11A-1-AL	17	bettong	nose hole	8	3.5	3	2.875	25.9672	50.1443	38.7067	25.9672
MF11A-1	985	84	84	0	0.771907	0.0846203	0.065319	0.708714	MF11A-1-AL	18	bettong	nose hole	4	3	2.5	1.75	8.01761	19.6299	15.1525	9.62113
MF11A-1	985	84	84	0	0.771907	0.0846203	0.065319	0.708714	MF11A-1-AL	19	bettong	nose hole	6	4	3	2.5	19.635	39.3794	30.3973	19.635
MF11A-1	985	84	84	0	0.771907	0.0846203	0.065319	0.708714	MF11A-1-AL	20	bettong	nose hole	4	3	3	1.75	9.62113	22.3559	17.2567	9.62113
MF11A-1	985	84	84	0	0.771907	0.0846203	0.065319	0.708714	MF11A-1-AL	1	bettong	nose hole	8	4	2.5	3	23.5619	46.0553	35.5504	28.2743
MF11A-1	985	84	84	0	0.771907	0.0846203	0.065319	0.708714	MF11A-1-AL	21	bettong		4.91	3.86	3.12	2.1925	15.7059	32.7	25.2414	15.1018
MF11A-1	985	84	84	0	0.771907	0.0846203	0.065319	0.708714	MF11A-1-AL	22	bettong		4.91	3.86	3.12	2.1925	15.7059	32.7	25.2414	15.1018
MF11A-1	985	84	84	0	0.771907	0.0846203	0.065319	0.708714	MF11A-1-AL	23	bettong		4.91	3.86	3.12	2.1925	15.7059	32.7	25.2414	15.1018
MF11A-1	985	84	84	0	0.771907	0.0846203	0.065319	0.708714	MF11A-1-AL	24	bettong		4.91	3.86	3.12	2.1925	15.7059	32.7	25.2414	15.1018
MF11A-1	985	84	84	0	0.771907	0.0846203	0.065319	0.708714	MF11A-1-AL	25	bettong		4.91	3.86	3.12	2.1925	15.7059	32.7	25.2414	15.1018
MF11A-1	985	84	84	0	0.771907	0.0846203	0.065319	0.708714	MF11A-1-AL	26	bettong		4.91	3.86	3.12	2.1925	15.7059	32.7	25.2414	15.1018
MF11A-1	985	84	84	0	0.771907	0.0846203	0.065319	0.708714	MF11A-1-AL	27	bettong		4.91	3.86	3.12	2.1925	15.7059	32.7	25.2414	15.1018
MF11A-1	985	84	84	0	0.771907	0.0846203	0.065319	0.708714	MF11A-1-AL	28	bettong		4.91	3.86	3.12	2.1925	15.7059	32.7	25.2414	15.1018
MF11A-1	985	84	84	0	0.771907	0.0846203	0.065319	0.708714	MF11A-1-AL	29	bettong		4.91	3.86	3.12	2.1925	15.7059	32.7	25.2414	15.1018
MF11A-1	985	84	84	0	0.771907	0.0846203	0.065319	0.708714	MF11A-1-AL	30	bettong		4.91	3.86	3.12	2.1925	15.7059	32.7	25.2414	15.1018
MF11A-1	985	84	84	0	0.771907	0.0846203	0.065319	0.708714	MF11A-1-AL	31	bettong		4.91	3.86	3.12	2.1925	15.7059	32.7	25.2414	15.1018
MF11A-1	985	84	84	0	0.771907	0.0846203	0.065319	0.708714	MF11A-1-AL	32	bettong		4.91	3.86	3.12	2.1925	15.7059	32.7	25.2414	15.1018
MF11A-1	985	84	84	0	0.771907	0.0846203	0.065319	0.708714	MF11A-1-AL	33	bettong		4.91	3.86	3.12	2.1925	15.7059	32.7	25.2414	15.1018
MF11A-1	985	84	84	0	0.771907	0.0846203	0.065319	0.708714	MF11A-1-AL	34	bettong		4.91	3.86	3.12	2.1925	15.7059	32.7	25.2414	15.1018
MF11A-1	985	84	84	0	0.771907	0.0846203	0.065319	0.708714	MF11A-1-AL	35	bettong		4.91	3.86	3.12	2.1925	15.7059	32.7	25.2414	15.1018
MF11A-1	985	84	84	0	0.771907	0.0846203	0.065319	0.708714	MF11A-1-AL	36	bettong		4.91	3.86	3.12	2.1925	15.7059	32.7	25.2414	15.1018
MF11A-1	985	84	84	0	0.771907	0.0846203	0.065319	0.708714	MF11A-1-AL	37	bettong		4.91	3.86	3.12	2.1925	15.7059	32.7	25.2414	15.1018
MF11A-1	985	84	84	0	0.771907	0.0846203	0.065319	0.708714	MF11A-1-AL	38	bettong		4.91	3.86	3.12	2.1925	15.7059	32.7	25.2414	15.1018
MF11A-1	985	84	84	0	0.771907	0.0846203	0.065319	0.708714	MF11A-1-AL	39	bettong		4.91	3.86	3.12	2.1925	15.7059	32.7	25.2414	15.1018
MF11A-1	985	84	84	0	0.771907	0.0846203	0.065319	0.708714	MF11A-1-AL	40	bettong		4.91	3.86	3.12	2.1925	15.7059	32.7	25.2414	15.1018
MF11A-1	985	84	84	0	0.771907	0.0846203	0.065319	0.708714	MF11A-1-AL	41	bettong		4.91	3.86	3.12	2.1925	15.7059	32.7	25.2414	15.1018
MF11A-1	985	84	84	0	0.771907	0.0846203	0.065319	0.708714	MF11A-1-AL	42	bettong		4.91	3.86	3.12	2.1925	15.7059	32.7	25.2414	15.1018
MF11A-1	985	84	84	0	0.771907	0.0846203	0.065319	0.708714	MF11A-1-AL	43	bettong		4.91	3.86	3.12	2.1925	15.7059	32.7	25.2414	15.1018
MF11A-1	985	84	84	0	0.771907	0.0846203	0.065319	0.708714	MF11A-1-AL	44	bettong		4.91	3.86	3.12	2.1925	15.7059	32.7	25.2414	15.1018
MF11A-1	985	84	84	0	0.771907	0.0846203	0.065319	0.708714	MF11A-1-AL	45	bettong		4.91	3.86	3.12	2.1925	15.7059	32.7	25.2414	15.1018
MF11A-1	985	84	84	0	0.771907	0.0846203	0.065319	0.708714	MF11A-1-AL	46	bettong		4.91	3.86	3.12	2.1925	15.7059	32.7	25.2414	15.1018
MF11A-1	985	84	84	0	0.771907	0.0846203	0.065319	0.708714	MF11A-1-AL	47	bettong		4.91	3.86	3.12	2.1925	15.7059	32.7	25.2414	15.1018
MF11A-1	985	84	84	0	0.771907	0.0846203	0.065319	0.708714	MF11A-1-AL	48	bettong		4.91	3.86	3.12	2.1925	15.7059	32.7	25.2414	15.1018
MF11A-1	985	84	84	0	0.771907	0.0846203	0.065319	0.708714	MF11A-1-AL	49	bettong		4.91	3.86	3.12	2.1925	15.7059	32.7	25.2414	15.1018
MF11A-1	985	84	84	0	0.771907	0.0846203	0.065319	0.708714	MF11A-1-AL	50	bettong		4.91	3.86	3.12	2.1925	15.7059	32.7	25.2414	15.1018
MF11A-1	985	84	84	0	0.771907	0.0846203	0.065319	0.708714	MF11A-1-AL	51	bettong		4.91	3.86	3.12	2.1925	15.7059	32.7	25.2414	15.1018
MF11A-1	985	84	84	0	0.771907	0.0846203	0.065319	0.708714	MF11A-1-AL	52	bettong		4.91	3.86	3.12	2.1925	15.7059	32.7	25.2414	15.1018
MF11A-1	985	84	84	0	0.771907	0.0846203	0.065319	0.708714	MF11A-1-AL	53	bettong		4.91	3.86	3.12	2.1925	15.7059	32.7	25.2414	15.1018
MF11A-1	985	84	84	0	0.771907	0.0846203	0.065319	0.708714	MF11A-1-AL	54	bettong		4.91	3.86	3.12	2.1925	15.7059	32.7	25.2414	15.1018
MF11A-1	985	84	84	0	0.771907	0.0846203	0.065319	0.708714	MF11A-1-AL	55	bettong		4.91	3.86	3.12	2.1925	15.7059	32.7	25.2414	15.1018
MF11A-1	985	84	84	0	0.771907	0.0846203	0.065319	0.708714	MF11A-1-AL	56	bettong		4.91	3.86	3.12	2.1925	15.7059	32.7	25.2414	15.1018
MF11A-1	985	84	84	0	0.771907	0.0846203	0.065319	0.708714	MF11A-1-AL	57	bettong		4.91	3.86	3.12	2.1925	15.7059	32.7	25.2414	15.1018
MF11A-1	985	84	84	0	0.771907	0.0846203	0.065319	0.708714	MF11A-1-AL	58	bettong		4.91	3.86	3.12	2.1925	15.7059	32.7	25.2414	15.1018
MF11A-1	985	84	84	0	0.771907	0.0846203	0.065319	0.708714	MF11A-1-AL	59	bettong		4.91	3.86	3.12	2.1925	15.7059	32.7	25.2414	15.1018
MF11A-1	985	84	84	0	0.771907	0.0846203	0.065319	0.708714	MF11A-1-AL	60	bettong		4.91	3.86	3.12	2.1925	15.7059	32.7	25.2414	15.1018
MF11A-1	985	84	84	0	0.771907	0.0846203	0.065319	0.708714	MF11A-1-AL	61	bettong		4.91	3.86	3.12	2.1925	15.7059	32.7	25.2414	15.1018
MF11A-1	985	84	84	0	0.771907	0.0846203	0.065319	0.708714	MF11A-1-AL	62	bettong		4.91	3.86	3.12	2.1925	15.7059	32.7	25.2414	15.1018
MF11A-1	985	84	84	0	0.771907	0.0846203	0.065319	0.708714	MF11A-1-AL	63	bettong		4.91	3.86	3.12	2.1925	15.7059	32.7	25.2414	15.1018
MF11A-1	985	84	84	0	0.771907	0.0846203	0.065319	0.708714	MF11A-1-AL	64	bettong		4.91	3.86	3.12	2.1925	15.7059	32.7	25.2414	15.1018
MF11A-1	985	84	84	0	0.771907	0.0846203	0.065319	0.708714	MF11A-1-AL	65	bettong		4.91	3.86	3.12	2.1925	15.7059	32.7	25.2414	15.1018
MF11A-1	985	84	84	0	0.771907	0.0846203	0.065319	0.708714	MF11A-1-AL	66	bettong		4.91	3.86	3.12	2.1925	15.7059	32.7	25.2414	15.1018
MF11A-1	985	84	84	0	0.771907	0.0846203	0.065319	0.708714	MF11A-1-AL	67	bettong		4.91	3.86	3.12	2.1925	15.7059	32.7	25.2414	15.1018
MF11A-1	985	84	84	0	0.771907	0.0846203	0.065319	0.708714	MF11A-1-AL	68	bettong		4.91	3.86	3.12	2.1925	15.7059	32.7	25.2414	15.1018
MF11A-1	985	84	84	0	0.771907	0.0846203	0.065319	0.708714	MF11A-1-AL	69	bettong		4.91	3.86	3.12	2.1925	15.7059	32.7	25.2414	15.1018
MF11A-1	985	84	84	0	0.771907	0.0846203	0.065319	0.708714	MF11A-1-AL	70	bettong		4.91	3.86	3.12	2.1925	15.7059	32.7	25.2414	15.1018
MF11A-1	985	84	84	0	0.771907	0.0846203	0.065319	0.708714	MF11A-1-AL	71	bettong		4.91	3.86	3.12	2.1925	15.7059	32.7	25.2414	15.1018
MF11A-1	985	84	84	0	0.771907	0.0846203	0.065319	0.708714	MF11A-1-AL	72	bettong		4.91	3.86	3.12	2.1925	15.7059	32.7	25.2414	15.1018
MF11A-1	985	84	84	0	0.771907	0.0846203	0.065319	0.708714	MF11A-1-AL	73	bettong		4.91	3.86	3.12	2.1925	15.7059	32.7	25.2414	15.1018
MF11A-1	985	84	84	0	0.771907	0.0846203	0.065319	0.708714	MF11A-1-AL	74	bettong		4.91	3.86	3.12	2.1925	15.7059	32.7	25.2414	15.1018
MF11A-1	985	84	84	0	0.771907	0.0846203	0.065319	0.708714	MF11A-1-AL	75	bettong		4.91	3.86	3.12	2.1925	15.7059	32.7	25.2414	15.1018
MF11A-1	985	84	84	0	0.771907	0.0846203	0.065319	0.708714	MF11A-1-AL	76	bettong		4.91	3.86	3.12	2.1925	15.7059	32.7	25.2414	15.1018
MF11A-1	985	84	84	0	0.771907	0.0846203	0.065319	0.708714	MF11A-1-AL	77	bettong		4.91	3.86	3.12	2.1925	15.7059	32.7	25.2414	15.1018
MF11A-1	985	84	84	0	0.771907	0.0846203	0.065319	0.708714	MF11A-1-AL	78	bettong		4.91	3.86	3.12	2.1925	15.7059	32.7	25.2414	15.1018
MF11A-1	985	84	84	0	0.771907	0.0846203	0.065319	0.708714	MF11A-1-AL	79	bettong		4.91	3.86	3.12	2.1925	15.7059	32.7	25.2414	15.1018
MF11A-1	985	84	84	0	0.771907	0.0846203	0.065319	0.708714	MF11A-1-AL	80	bettong		4.91	3.86	3.12	2.1925	15.7059	32.7	25.2414	15.1018
MF11A-1	985	84	84	0	0.771907	0.0846203	0.065319	0.708714	MF11A-1-AL	81	bettong		4.91	3.86	3.12	2.1925	15.7059	32.7	25.2414	15.1018
MF11A-1	985	84	84	0	0.771907	0.0846203	0.065319	0.708714	MF11A-1-AL	82	bettong		4.91	3.86	3.12	2.1925	15.7059	32.7	25.2414	15.1018
MF11A-1	985	84	84	0	0.771907	0.0846203	0.065319	0.708714	MF11A-1-AL	83	bettong		4.91	3.86	3.12	2.1925	15.7059	32.7	25.2414	15.1018
MF11A-1	985	84	84	0	0.771907	0.0846203	0.065319	0.708714	MF11A-1-AL	84	bettong		4.91	3.86	3.12	2.1925	15.7059	32.7	25.2414	15.1018
MF11A-1	984	168	166	0	0.852499	0.133242	0.113589	0.678302	MF11A-1-AR	5	bettong	nose hole	3	3	2.5	1.5	5.89049	16.0138	13.6518	7.06858
MF11A-1	984	168	166	0	0.852499	0.133242	0.113589	0.678302	MF11A-1-AR	6	bettong	nose hole	4	3	2	1.75	6.41409	16.9039	14.4106	9.62113
MF11A-1	984	168	166	0	0.852499	0.133242	0.113589	0.678302	MF11A-1-AR	7	bettong	nose hole	4	3	2	1.75	6.41409	16.9039	14.4106	9.62113
MF11A-1	984	168	166	0	0.852499	0.133242	0.113589	0.678302	MF11A-1-AR	8	bettong	nose hole	5	4	3	2.25	15.9043	33.0373	28.1643	15.9043
MF11A-1	984	168	166	0	0.852499	0.133242	0.113589	0.678302	MF11A-1-AR	9	bettong	nose hole	4.5	4.5	3	2.25	15.9043	33.0373	28.1643	15.9043
MF11A-1	984	168	166	0	0.852499	0.133242	0.113589	0.678302	MF11A-1-AR	10	bettong	nose hole	4	4	3	2	12.5664	27.3628	23.3268	12.5664
MF11A-1	984	168	166	0	0.852499	0.133242	0.113589	0.678302	MF11A-1-AR	11	bettong	nose hole	4	3	3	1.75	9.62113	22.3559	19.0584	9.62113
MF11A-1	984	168	166	0	0.852499	0.133242	0.113589	0.678302	MF11A-1-AR	12	bettong	nose hole	8	4	3	3	28.2743	54.0664	46.0915	28.2743
MF11A-1	984	168	166	0	0.852499	0.133242	0.113589	0.678302	MF11A-1-AR	13	bettong	scratch	4	3	1	1.75	3.20704	11.452	9.76279	9.62113
MF11A-1	984	168	166	0	0.852499	0.133242	0.113589	0.678302	MF11A-1-AR	14	bettong	nose hole	4	3.5	2	1.875	7.36311	18.5173	15.786	11.0447
MF11A-1	984	168	166	0	0.852499	0.133242	0.113589	0.678302	MF11A-1-AR	15	bettong	nose hole	4	4	3	2	12.5664	27.3628	23.3268	12.5664
MF11A-1	984	168	166	0	0.852499	0.133242	0.113589	0.678302	MF11A-1-AR	16	bettong	nose hole	5	3	3	2	12.5664	27.3628	23.3268	12.5664
MF11A-1	984	168	166	0	0.852499	0.133242	0.113589	0.678302	MF11A-1-AR	17	bettong	nose hole	12	4	4	4	67.0206	119.935	102.245	50.2655
MF11A-1	984	168	166	0	0.852499	0.133242	0.113589	0.678302	MF11A-1-AR	18	bettong	nose hole	5	5	5	2.5	32.7249	61.6324	52.5415	19.635
MF11A-1	984	168	166	0	0.852499	0.133242	0.113589	0.678302	MF11A-1-AR	19	bettong	nose hole	4	3	4	1.75	12.8282	27.8079	23.7062	9.62113
MF11A-1	984	168	166	0	0.852499	0.133242	0.113589	0.678302	MF11A-1-AR	20	bettong	nose hole	4	4	3	2	12.5664	27.3628	23.3268	12.5664
MF11A-1	984	168	166	0	0.852499	0.133242	0.113589	0.678302	MF11A-1-AR	21	bettong	nose hole	4	3	6	1.75	19.2423	38.7118	33.0018	9.62113
MF11A-1	984	168	166	0	0.852499	0.133242	0.113589	0.678302	MF11A-1-AR	22	unknown	bowl	23	9	3	8	201.062	347.805	296.504	201.062
MF11A-1	984	168	166	0	0.852499	0.133242	0.113589	0.678302	MF11A-1-AR	23	bettong	nose hole	5	4	6	2.25	31.8086	60.0747	51.2136	15.9043
MF11A-1	984	168	166	0	0.852499	0.133242	0.113589	0.678302	MF11A-1-AR	24	bettong	nose hole	6	5	7	2.75	55.436	100.241	85.4555	23.7583
MF11A-1	984	168	166	0	0.852499	0.133242	0.113589	0.678302	MF11A-1-AR	25	bettong	nose hole	6	5	4	2.75	31.6777	59.8521	51.0239	23.7583
MF11A-1	984	168	166	0	0.852499	0.133242	0.113589	0.678302	MF11A-1-AR	1	bettong	nose hole	4	4	2	2	8.37758	20.2419	17.2562	12.5664
MF11A-1	984	168	166	0	0.852499	0.133242	0.113589	0.678302	MF11A-1-AR	2	bettong	nose hole	4	4	3	2	12.5664	27.3628	23.3268	12.5664
MF11A-1	984	168	166	0	0.852499	0.133242	0.113589	0.678302	MF11A-1-AR	3	bettong	nose hole	5	4	3	2.25	15.9043	33.0373	28.1643	15.9043
MF11A-1	984	168	166	0	0.852499	0.133242	0.113589	0.678302	MF11A-1-AR	4	bettong	nose hole	7	4	2	2.75	15.8389	32.9261	28.0694	23.7583
MF11A-1	984	168	166	0	0.852499	0.133242	0.113589	0.678302	MF11A-1-AR	26	unknown		7.19	4.91	1.65	3.025	15.8111	32.8789	28.0293	28.7475
MF11A-1	984	168	166	0	0.852499	0.133242	0.113589	0.678302	MF11A-1-AR	27	bettong		4.91	3.86	3.12	2.1925	15.7059	32.7	27.8767	15.1018
MF11A-1	984	168	166	0	0.852499	0.133242	0.113589	0.678302	MF11A-1-AR	28	bettong		4.91	3.86	3.12	2.1925	15.7059	32.7	27.8767	15.1018
MF11A-1	984	168	166	0	0.852499	0.133242	0.113589	0.678302	MF11A-1-AR	29	bettong		4.91	3.86	3.12	2.1925	15.7059	32.7	27.8767	15.1018
MF11A-1	984	168	166	0	0.852499	0.133242	0.113589	0.678302	MF11A-1-AR	30	bettong		4.91	3.86	3.12	2.1925	15.7059	32.7	27.8767	15.1018
MF11A-1	984	168	166	0	0.852499	0.133242	0.113589	0.678302	MF11A-1-AR	31	bettong		4.91	3.86	3.12	2.1925	15.7059	32.7	27.8767	15.1018
MF11A-1	984	168	166	0	0.852499	0.133242	0.113589	0.678302	MF11A-1-AR	32	bettong		4.91	3.86	3.12	2.1925	15.7059	32.7	27.8767	15.1018
MF11A-1	984	168	166	0	0.852499	0.133242	0.113589	0.678302	MF11A-1-AR	33	bettong		4.91	3.86	3.12	2.1925	15.7059	32.7	27.8767	15.1018
MF11A-1	984	168	166	0	0.852499	0.133242	0.113589	0.678302	MF11A-1-AR	34	bettong		4.91	3.86	3.12	2.1925	15.7059	32.7	27.8767	15.1018
MF11A-1	984	168	166	0	0.852499	0.133242	0.113589	0.678302	MF11A-1-AR	35	bettong		4.91	3.86	3.12	2.1925	15.7059	32.7	27.8767	15.1018
MF11A-1	984	168	166	0	0.852499	0.133242	0.113589	0.678302	MF11A-1-AR	36	bettong		4.91	3.86	3.12	2.1925	15.7059	32.7	27.8767	15.1018
MF11A-1	984	168	166	0	0.852499	0.133242	0.113589	0.678302	MF11A-1-AR	37	bettong		4.91	3.86	3.12	2.1925	15.7059	32.7	27.8767	15.1018
MF11A-1	984	168	166	0	0.852499	0.133242	0.113589	0.678302	MF11A-1-AR	38	bettong		4.91	3.86	3.12	2.1925	15.7059	32.7	27.8767	15.1018
MF11A-1	984	168	166	0	0.852499	0.133242	0.113589	0.678302	MF11A-1-AR	39	bettong		4.91	3.86	3.12	2.1925	15.7059	32.7	27.8767	15.1018
MF11A-1	984	168	166	0	0.852499	0.133242	0.113589	0.678302	MF11A-1-AR	40	bettong		4.91	3.86	3.12	2.1925	15.7059	32.7	27.8767	15.1018
MF11A-1	984	168	166	0	0.852499	0.133242	0.113589	0.678302	MF11A-1-AR	41	bettong		4.91	3.86	3.12	2.1925	15.7059	32.7	27.8767	15.1018
MF11A-1	984	168	166	0	0.852499	0.133242	0.113589	0.678302	MF11A-1-AR	42	bettong		4.91	3.86	3.12	2.1925	15.7059	32.7	27.8767	15.1018
MF11A-1	984	168	166	0	0.852499	0.133242	0.113589	0.678302	MF11A-1-AR	43	bettong		4.91	3.86	3.12	2.1925	15.7059	32.7	27.8767	15.1018
MF11A-1	984	168	166	0	0.852499	0.133242	0.113589	0.678302	MF11A-1-AR	44	bettong		4.91	3.86	3.12	2.1925	15.7059	32.7	27.8767	15.1018
MF11A-1	984	168	166	0	0.852499	0.133242	0.113589	0.678302	MF11A-1-AR	45	bettong		4.91	3.86	3.12	2.1925	15.7059	32.7	27.8767	15.1018
MF11A-1	984	168	166	0	0.852499	0.133242	0.113589	0.678302	MF11A-1-AR	46	bettong		4.91	3.86	3.12	2.1925	15.7059	32.7	27.8767	15.1018
MF11A-1	984	168	166	0	0.852499	0.133242	0.113589	0.678302	MF11A-1-AR	47	bettong		4.91	3.86	3.12	2.1925	15.7059	32.7	27.8767	15.1018
MF11A-1	984	168	166	0	0.852499	0.133242	0.113589	0.678302	MF11A-1-AR	48	bettong		4.91	3.86	3.12	2.1925	15.7059	32.7	27.8767	15.1018
MF11A-1	984	168	166	0	0.852499	0.133242	0.113589	0.678302	MF11A-1-AR	49	bettong		4.91	3.86	3.12	2.1925	15.7059	32.7	27.8767	15.1018
MF11A-1	984	168	166	0	0.852499	0.133242	0.113589	0.678302	MF11A-1-AR	50	bettong		4.91	3.86	3.12	2.1925	15.7059	32.7	27.8767	15.1018
MF11A-1	984	168	166	0	0.852499	0.133242	0.113589	0.678302	MF11A-1-AR	51	bettong		4.91	3.86	3.12	2.1925	15.7059	32.7	27.8767	15.1018
MF11A-1	984	168	166	0	0.852499	0.133242	0.113589	0.678302	MF11A-1-AR	52	bettong		4.91	3.86	3.12	2.1925	15.7059	32.7	27.8767	15.1018
MF11A-1	984	168	166	0	0.852499	0.133242	0.113589	0.678302	MF11A-1-AR	53	bettong		4.91	3.86	3.12	2.1925	15.7059	32.7	27.8767	15.1018
MF11A-1	984	168	166	0	0.852499	0.133242	0.113589	0.678302	MF11A-1-AR	54	bettong		4.91	3.86	3.12	2.1925	15.7059	32.7	27.8767	15.1018
MF11A-1	984	168	166	0	0.852499	0.133242	0.113589	0.678302	MF11A-1-AR	55	bettong		4.91	3.86	3.12	2.1925	15.7059	32.7	27.8767	15.1018
MF11A-1	984	168	166	0	0.852499	0.133242	0.113589	0.678302	MF11A-1-AR	56	bettong		4.91	3.86	3.12	2.1925	15.7059	32.7	27.8767	15.1018
MF11A-1	984	168	166	0	0.852499	0.133242	0.113589	0.678302	MF11A-1-AR	57	bettong		4.91	3.86	3.12	2.1925	15.7059	32.7	27.8767	15.1018
MF11A-1	984	168	166	0	0.852499	0.133242	0.113589	0.678302	MF11A-1-AR	58	bettong		4.91	3.86	3.12	2.1925	15.7059	32.7	27.8767	15.1018
MF11A-1	984	168	166	0	0.852499	0.133242	0.113589	0.678302	MF11A-1-AR	59	bettong		4.91	3.86	3.12	2.1925	15.7059	32.7	27.8767	15.1018
MF11A-1	984	168	166	0	0.852499	0.133242	0.113589	0.678302	MF11A-1-AR	60	bettong		4.91	3.86	3.12	2.1925	15.7059	32.7	27.8767	15.1018
MF11A-1	984	168	166	0	0.852499	0.133242	0.113589	0.678302	MF11A-1-AR	61	bettong		4.91	3.86	3.12	2.1925	15.7059	32.7	27.8767	15.1018
MF11A-1	984	168	166	0	0.852499	0.133242	0.113589	0.678302	MF11A-1-AR	62	bettong		4.91	3.86	3.12	2.1925	15.7059	32.7	27.8767	15.1018
MF11A-1	984	168	166	0	0.852499	0.133242	0.113589	0.678302	MF11A-1-AR	63	bettong		4.91	3.86	3.12	2.1925	15.7059	32.7	27.8767	15.1018
MF11A-1	984	168	166	0	0.852499	0.133242	0.113589	0.678302	MF11A-1-AR	64	bettong		4.91	3.86	3.12	2.1925	15.7059	32.7	27.8767	15.1018
MF11A-1	984	168	166	0	0.852499	0.133242	0.113589	0.678302	MF11A-1-AR	65	bettong		4.91	3.86	3.12	2.1925	15.7059	32.7	27.8767	15.1018
MF11A-1	984	168	166	0	0.852499	0.133242	0.113589	0.678302	MF11A-1-AR	66	bettong		4.91	3.86	3.12	2.1925	15.7059	32.7	27.8767	15.1018
MF11A-1	984	168	166	0	0.852499	0.133242	0.113589	0.678302	MF11A-1-AR	67	bettong		4.91	3.86	3.12	2.1925	15.7059	32.7	27.8767	15.1018
MF11A-1	984	168	166	0	0.852499	0.133242	0.113589	0.678302	MF11A-1-AR	68	bettong		4.91	3.86	3.12	2.1925	15.7059	32.7	27.8767	15.1018
MF11A-1	984	168	166	0	0.852499	0.133242	0.113589	0.678302	MF11A-1-AR	69	bettong		4.91	3.86	3.12	2.1925	15.7059	32.7	27.8767	15.1018
MF11A-1	984	168	166	0	0.852499	0.133242	0.113589	0.678302	MF11A-1-AR	70	bettong		4.91	3.86	3.12	2.1925	15.7059	32.7	27.8767	15.1018
MF11A-1	984	168	166	0	0.852499	0.133242	0.113589	0.678302	MF11A-1-AR	71	bettong		4.91	3.86	3.12	2.1925	15.7059	32.7	27.8767	15.1018
MF11A-1	984	168	166	0	0.852499	0.133242	0.113589	0.678302	MF11A-1-AR	72	bettong		4.91	3.86	3.12	2.1925	15.7059	32.7	27.8767	15.1018
MF11A-1	984	168	166	0	0.852499	0.133242	0.113589	0.678302	MF11A-1-AR	73	bettong		4.91	3.86	3.12	2.1925	15.7059	32.7	27.8767	15.1018
MF11A-1	984	168	166	0	0.852499	0.133242	0.113589	0.678302	MF11A-1-AR	74	bettong		4.91	3.86	3.12	2.1925	15.7059	32.7	27.8767	15.1018
MF11A-1	984	168	166	0	0.852499	0.133242	0.113589	0.678302	MF11A-1-AR	75	bettong		4.91	3.86	3.12	2.1925	15.7059	32.7	27.8767	15.1018
MF11A-1	984	168	166	0	0.852499	0.133242	0.113589	0.678302	MF11A-1-AR	76	bettong		4.91	3.86	3.12	2.1925	15.7059	32.7	27.8767	15.1018
MF11A-1	984	168	166	0	0.852499	0.133242	0.113589	0.678302	MF11A-1-AR	77	bettong		4.91	3.86	3.12	2.1925	15.7059	32.7	27.8767	15.1018
MF11A-1	984	168	166	0	0.852499	0.133242	0.113589	0.678302	MF11A-1-AR	78	bettong		4.91	3.86	3.12	2.1925	15.7059	32.7	27.8767	15.1018
MF11A-1	984	168	166	0	0.852499	0.133242	0.113589	0.678302	MF11A-1-AR	79	bettong		4.91	3.86	3.12	2.1925	15.7059	32.7	27.8767	15.1018
MF11A-1	984	168	166	0	0.852499	0.133242	0.113589	0.678302	MF11A-1-AR	80	bettong		4.91	3.86	3.12	2.1925	15.7059	32.7	27.8767	15.1018
MF11A-1	984	168	166	0	0.852499	0.133242	0.113589	0.678302	MF11A-1-AR	81	bettong		4.91	3.86	3.12	2.1925	15.7059	32.7	27.8767	15.1018
MF11A-1	984	168	166	0	0.852499	0.133242	0.113589	0.678302	MF11A-1-AR	82	bettong		4.91	3.86	3.12	2.1925	15.7059	32.7	27.8767	15.1018
MF11A-1	984	168	166	0	0.852499	0.133242	0.113589	0.678302	MF11A-1-AR	83	bettong		4.91	3.86	3.12	2.1925	15.7059	32.7	27.8767	15.1018
MF11A-1	984	168	166	0	0.852499	0.133242	0.113589	0.678302	MF11A-1-AR	84	bettong		4.91	3.86	3.12	2.1925	15.7059	32.7	27.8767	15.1018
MF11A-1	984	168	166	0	0.852499	0.133242	0.113589	0.678302	MF11A-1-AR	85	bettong		4.91	3.86	3.12	2.1925	15.7059	32.7	27.8767	15.1018
MF11A-1	984	168	166	0	0.852499	0.133242	0.113589	0.678302	MF11A-1-AR	86	bettong		4.91	3.86	3.12	2.1925	15.7059	32.7	27.8767	15.1018
MF11A-1	984	168	166	0	0.852499	0.133242	0.113589	0.678302	MF11A-1-AR	87	bettong		4.91	3.86	3.12	2.1925	15.7059	32.7	27.8767	15.1018
MF11A-1	984	168	166	0	0.852499	0.133242	0.113589	0.678302	MF11A-1-AR	88	bettong		4.91	3.86	3.12	2.1925	15.7059	32.7	27.8767	15.1018
MF11A-1	984	168	166	0	0.852499	0.133242	0.113589	0.678302	MF11A-1-AR	89	bettong		4.91	3.86	3.12	2.1925	15.7059	32.7	27.8767	15.1018
MF11A-1	984	168	166	0	0.852499	0.133242	0.113589	0.678302	MF11A-1-AR	90	bettong		4.91	3.86	3.12	2.1925	15.7059	32.7	27.8767	15.1018
MF11A-1	984	168	166	0	0.852499	0.133242	0.113589	0.678302	MF11A-1-AR	91	bettong		4.91	3.86	3.12	2.1925	15.7059	32.7	27.8767	15.1018
MF11A-1	984	168	166	0	0.852499	0.133242	0.113589	0.678302	MF11A-1-AR	92	bettong		4.91	3.86	3.12	2.1925	15.7059	32.7	27.8767	15.1018
MF11A-1	984	168	166	0	0.852499	0.133242	0.113589	0.678302	MF11A-1-AR	93	bettong		4.91	3.86	3.12	2.1925	15.7059	32.7	27.8767	15.1018
MF11A-1	984	168	166	0	0.852499	0.133242	0.113589	0.678302	MF11A-1-AR	94	bettong		4.91	3.86	3.12	2.1925	15.7059	32.7	27.8767	15.1018
MF11A-1	984	168	166	0	0.852499	0.133242	0.113589	0.678302	MF11A-1-AR	95	bettong		4.91	3.86	3.12	2.1925	15.7059	32.7	27.8767	15.1018
MF11A-1	984	168	166	0	0.852499	0.133242	0.113589	0.678302	MF11A-1-AR	96	bettong		4.91	3.86	3.12	2.1925	15.7059	32.7	27.8767	15.1018
MF11A-1	984	168	166	0	0.852499	0.133242	0.113589	0.678302	MF11A-1-AR	97	bettong		4.91	3.86	3.12	2.1925	15.7059	32.7	27.8767	15.1018
MF11A-1	984	168	166	0	0.852499	0.133242	0.113589	0.678302	MF11A-1-AR	98	bettong		4.91	3.86	3.12	2.1925	15.7059	32.7	27.8767	15.1018
MF11A-1	984	168	166	0	0.852499	0.133242	0.113589	0.678302	MF11A-1-AR	99	bettong		4.91	3.86	3.12	2.1925	15.7059	32.7	27.8767	15.1018
MF11A-1	984	168	166	0	0.852499	0.133242	0.113589	0.678302	MF11A-1-AR	100	bettong		4.91	3.86	3.12	2.1925	15.7059	32.7	27.8767	15.1018
MF11A-1	984	168	166	0	0.852499	0.133242	0.113589	0.678302	MF11A-1-AR	101	bettong		4.91	3.86	3.12	2.1925	15.7059	32.7	27.8767	15.1018
MF11A-1	984	168	166	0	0.852499	0.133242	0.113589	0.678302	MF11A-1-AR	102	bettong		4.91	3.86	3.12	2.1925	15.7059	32.7	27.8767	15.1018
MF11A-1	984	168	166	0	0.852499	0.133242	0.113589	0.678302	MF11A-1-AR	103	bettong		4.91	3.86	3.12	2.1925	15.7059	32.7	27.8767	15.1018
MF11A-1	984	168	166	0	0.852499	0.133242	0.113589	0.678302	MF11A-1-AR	104	bettong		4.91	3.86	3.12	2.1925	15.7059	32.7	27.8767	15.1018
MF11A-1	984	168	166	0	0.852499	0.133242	0.113589	0.678302	MF11A-1-AR	105	bettong		4.91	3.86	3.12	2.1925	15.7059	32.7	27.8767	15.1018
MF11A-1	984	168	166	0	0.852499	0.133242	0.113589	0.678302	MF11A-1-AR	106	bettong		4.91	3.86	3.12	2.1925	15.7059	32.7	27.8767	15.1018
MF11A-1	984	168	166	0	0.852499	0.133242	0.113589	0.678302	MF11A-1-AR	107	bettong		4.91	3.86	3.12	2.1925	15.7059	32.7	27.8767	15.1018
MF11A-1	984	168	166	0	0.852499	0.133242	0.113589	0.678302	MF11A-1-AR	108	bettong		4.91	3.86	3.12	2.1925	15.7059	32.7	27.8767	15.1018
MF11A-1	984	168	166	0	0.852499	0.133242	0.113589	0.678302	MF11A-1-AR	109	bettong		4.91	3.86	3.12	2.1925	15.7059	32.7	27.8767	15.1018
MF11A-1	984	168	166	0	0.852499	0.133242	0.113589	0.678302	MF11A-1-AR	110	bettong		4.91	3.86	3.12	2.1925	15.7059	32.7	27.8767	15.1018
MF11A-1	984	168	166	0	0.852499	0.133242	0.113589	0.678302	MF11A-1-AR	111	bettong		4.91	3.86	3.12	2.1925	15.7059	32.7	27.8767	15.1018
MF11A-1	984	168	166	0	0.852499	0.133242	0.113589	0.678302	MF11A-1-AR	112	bettong		4.91	3.86	3.12	2.1925	15.7059	32.7	27.8767	15.1018
MF11A-1	984	168	166	0	0.852499	0.133242	0.113589	0.678302	MF11A-1-AR	113	bettong		4.91	3.86	3.12	2.1925	15.7059	32.7	27.8767	15.1018
MF11A-1	984	168	166	0	0.852499	0.133242	0.113589	0.678302	MF11A-1-AR	114	bettong		4.91	3.86	3.12	2.1925	15.7059	32.7	27.8767	15.1018
MF11A-1	984	168	166	0	0.852499	0.133242	0.113589	0.678302	MF11A-1-AR	115	bettong		4.91	3.86	3.12	2.1925	15.7059	32.7	27.8767	15.1018
MF11A-1	984	168	166	0	0.852499	0.133242	0.113589	0.678302	MF11A-1-AR	116	bettong		4.91	3.86	3.12	2.1925	15.7059	32.7	27.8767	15.1018
MF11A-1	984	168	166	0	0.852499	0.133242	0.113589	0.678302	MF11A-1-AR	117	bettong		4.91	3.86	3.12	2.1925	15.7059	32.7	27.8767	15.1018
MF11A-1	984	168	166	0	0.852499	0.133242	0.113589	0.678302	MF11A-1-AR	118	bettong		4.91	3.86	3.12	2.1925	15.7059	32.7	27.8767	15.1018
MF11A-1	984	168	166	0	0.852499	0.133242	0.113589	0.678302	MF11A-1-AR	119	bettong		4.91	3.86	3.12	2.1925	15.7059	32.7	27.8767	15.1018
MF11A-1	984	168	166	0	0.852499	0.133242	0.113589	0.678302	MF11A-1-AR	120	bettong		4.91	3.86	3.12	2.1925	15.7059	32.7	27.8767	15.1018
MF11A-1	984	168	166	0	0.852499	0.133242	0.113589	0.678302	MF11A-1-AR	121	bettong		4.91	3.86	3.12	2.1925	15.7059	32.7	27.8767	15.1018
MF11A-1	984	168	166	0	0.852499	0.133242	0.113589	0.678302	MF11A-1-AR	122	bettong		4.91	3.86	3.12	2.1925	15.7059	32.7	27.8767	15.1018
MF11A-1	984	168	166	0	0.852499	0.133242	0.113589	0.678302	MF11A-1-AR	123	bettong		4.91	3.86	3.12	2.1925	15.7059	32.7	27.8767	15.1018
MF11A-1	984	168	166	0	0.852499	0.133242	0.113589	0.678302	MF11A-1-AR	124	bettong		4.91	3.86	3.12	2.1925	15.7059	32.7	27.8767	15.1018
MF11A-1	984	168	166	0	0.852499	0.133242	0.113589	0.678302	MF11A-1-AR	125	bettong		4.91	3.86	3.12	2.1925	15.7059	32.7	27.8767	15.1018
MF11A-1	984	168	166	0	0.852499	0.133242	0.113589	0.678302	MF11A-1-AR	126	bettong		4.91	3.86	3.12	2.1925	15.7059	32.7	27.8767	15.1018
MF11A-1	984	168	166	0	0.852499	0.133242	0.113589	0.678302	MF11A-1-AR	127	bettong		4.91	3.86	3.12	2.1925	15.7059	32.7	27.8767	15.1018
MF11A-1	984	168	166	0	0.852499	0.133242	0.113589	0.678302	MF11A-1-AR	128	bettong		4.91	3.86	3.12	2.1925	15.7059	32.7	27.8767	15.1018
MF11A-1	984	168	166	0	0.852499	0.133242	0.113589	0.678302	MF11A-1-AR	129	bettong		4.91	3.86	3.12	2.1925	15.7059	32.7	27.8767	15.1018
MF11A-1	984	168	166	0	0.852499	0.133242	0.113589	0.678302	MF11A-1-AR	130	bettong		4.91	3.86	3.12	2.1925	15.7059	32.7	27.8767	15.1018
MF11A-1	984	168	166	0	0.852499	0.133242	0.113589	0.678302	MF11A-1-AR	131	bettong		4.91	3.86	3.12	2.1925	15.7059	32.7	27.8767	15.1018
MF11A-1	984	168	166	0	0.852499	0.133242	0.113589	0.678302	MF11A-1-AR	132	bettong		4.91	3.86	3.12	2.1925	15.7059	32.7	27.8767	15.1018
MF11A-1	984	168	166	0	0.852499	0.133242	0.113589	0.678302	MF11A-1-AR	133	bettong		4.91	3.86	3.12	2.1925	15.7059	32.7	27.8767	15.1018
MF11A-1	984	168	166	0	0.852499	0.133242	0.113589	0.678302	MF11A-1-AR	134	bettong		4.91	3.86	3.12	2.1925	15.7059	32.7	27.8767	15.1018
MF11A-1	984	168	166	0	0.852499	0.133242	0.113589	0.678302	MF11A-1-AR	135	bettong		4.91	3.86	3.12	2.1925	15.7059	32.7	27.8767	15.1018
MF11A-1	984	168	166	0	0.852499	0.133242	0.113589	0.678302	MF11A-1-AR	136	bettong		4.91	3.86	3.12	2.1925	15.7059	32.7	27.8767	15.1018
MF11A-1	984	168	166	0	0.852499	0.133242	0.113589	0.678302	MF11A-1-AR	137	bettong		4.91	3.86	3.12	2.1925	15.7059	32.7	27.8767	15.1018
MF11A-1	984	168	166	0	0.852499	0.133242	0.113589	0.678302	MF11A-1-AR	138	bettong		4.91	3.86	3.12	2.1925	15.7059	32.7	27.8767	15.1018
MF11A-1	984	168	166	0	0.852499	0.133242	0.113589	0.678302	MF11A-1-AR	139	bettong		4.91	3.86	3.12	2.1925	15.7059	32.7	27.8767	15.1018
MF11A-1	984	168	166	0	0.852499	0.133242	0.113589	0.678302	MF11A-1-AR	140	bettong		4.91	3.86	3.12	2.1925	15.7059	32.7	27.8767	15.1018
MF11A-1	984	168	166	0	0.852499	0.133242	0.113589	0.678302	MF11A-1-AR	141	bettong		4.91	3.86	3.12	2.1925	15.7059	32.7	27.8767	15.1018
MF11A-1	984	168	166	0	0.852499	0.133242	0.113589	0.678302	MF11A-1-AR	142	bettong		4.91	3.86	3.12	2.1925	15.7059	32.7	27.8767	15.1018
MF11A-1	984	168	166	0	0.852499	0.133242	0.113589	0.678302	MF11A-1-AR	143	bettong		4.91	3.86	3.12	2.1925	15.7059	32.7	27.8767	15.1018
MF11A-1	984	168	166	0	0.852499	0.133242	0.113589	0.678302	MF11A-1-AR	144	bettong		4.91	3.86	3.12	2.1925	15.7059	32.7	27.8767	15.1018
MF11A-1	984	168	166	0	0.852499	0.133242	0.113589	0.678302	MF11A-1-AR	145	bettong		4.91	3.86	3.12	2.1925	15.7059	32.7	27.8767	15.1018
MF11A-1	984	168	166	0	0.852499	0.133242	0.113589	0.678302	MF11A-1-AR	146	bettong		4.91	3.86	3.12	2.1925	15.7059	32.7	27.8767	15.1018
MF11A-1	984	168	166	0	0.852499	0.133242	0.113589	0.678302	MF11A-1-AR	147	bettong		4.91	3.86	3.12	2.1925	15.7059	32.7	27.8767	15.1018
MF11A-1	984	168	166	0	0.852499	0.133242	0.113589	0.678302	MF11A-1-AR	148	bettong		4.91	3.86	3.12	2.1925	15.7059	32.7	27.8767	15.1018
MF11A-1	984	168	166	0	0.852499	0.133242	0.113589	0.678302	MF11A-1-AR	149	bettong		4.91	3.86	3.12	2.1925	15.7059	32.7	27.8767	15.1018
MF11A-1	984	168	166	0	0.852499	0.133242	0.113589	0.678302	MF11A-1-AR	150	bettong		4.91	3.86	3.12	2.1925	15.7059	32.7	27.8767	15.1018
MF11A-1	984	168	166	0	0.852499	0.133242	0.113589	0.678302	MF11A-1-AR	151	bettong		4.91	3.86	3.12	2.1925	15.7059	32.7	27.8767	15.1018
MF11A-1	984	168	166	0	0.852499	0.133242	0.113589	0.678302	MF11A-1-AR	152	bettong		4.91	3.86	3.12	2.1925	15.7059	32.7	27.8767	15.1018
MF11A-1	984	168	166	0	0.852499	0.133242	0.113589	0.678302	MF11A-1-AR	153	bettong		4.91	3.86	3.12	2.1925	15.7059	32.7	27.8767	15.1018
MF11A-1	984	168	166	0	0.852499	0.133242	0.113589	0.678302	MF11A-1-AR	154	bettong		4.91	3.86	3.12	2.1925	15.7059	32.7	27.8767	15.1018
MF11A-1	984	168	166	0	0.852499	0.133242	0.113589	0.678302	MF11A-1-AR	155	bettong		4.91	3.86	3.12	2.1925	15.7059	32.7	27.8767	15.1018
MF11A-1	984	168	166	0	0.852499	0.133242	0.113589	0.678302	MF11A-1-AR	156	bettong		4.91	3.86	3.12	2.1925	15.7059	32.7	27.8767	15.1018
MF11A-1	984	168	166	0	0.852499	0.133242	0.113589	0.678302	MF11A-1-AR	157	bettong		4.91	3.86	3.12	2.1925	15.7059	32.7	27.8767	15.1018
MF11A-1	984	168	166	0	0.852499	0.133242	0.113589	0.678302	MF11A-1-AR	158	bettong		4.91	3.86	3.12	2.1925	15.7059	32.7	27.8767	15.1018
MF11A-1	984	168	166	0	0.852499	0.133242	0.113589	0.678302	MF11A-1-AR	159	bettong		4.91	3.86	3.12	2.1925	15.7059	32.7	27.8767	15.1018
MF11A-1	984	168	166	0	0.852499	0.133242	0.113589	0.678302	MF11A-1-AR	160	bettong		4.91	3.86	3.12	2.1925	15.7059	32.7	27.8767	15.1018
MF11A-1	984	168	166	0	0.852499	0.133242	0.113589	0.678302	MF11A-1-AR	161	bettong		4.91	3.86	3.12	2.1925	15.7059	32.7	27.8767	15.1018
MF11A-1	984	168	166	0	0.852499	0.133242	0.113589	0.678302	MF11A-1-AR	162	bettong		4.91	3.86	3.12	2.1925	15.7059	32.7	27.8767	15.1018
MF11A-1	984	168	166	0	0.852499	0.133242	0.113589	0.678302	MF11A-1-AR	163	bettong		4.91	3.86	3.12	2.1925	15.7059	32.7	27.8767	15.1018
MF11A-1	984	168	166	0	0.852499	0.133242	0.113589	0.678302	MF11A-1-AR	164	bettong		4.91	3.86	3.12	2.1925	15.7059	32.7	27.8767	15.1018
MF11A-1	984	168	166	0	0.852499	0.133242	0.113589	0.678302	MF11A-1-AR	165	bettong		4.91	3.86	3.12	2.1925	15.7059	32.7	27.8767	15.1018
MF11A-1	984	168	166	0	0.852499	0.133242	0.113589	0.678302	MF11A-1-AR	166	bettong		4.91	3.86	3.12	2.1925	15.7059	32.7	27.8767	15.1018
MF11A-1	984	168	166	0	0.852499	0.133242	0.113589	0.678302	MF11A-1-AR	167	bettong		4.91	3.86	3.12	2.1925	15.7059	32.7	27.8767	15.1018
MF11A-1	984	168	166	0	0.852499	0.133242	0.113589	0.678302	MF11A-1-AR	168	bettong		4.91	3.86	3.12	2.1925	15.7059	32.7	27.8767	15.1018
MF11A-1	986	48	45	0	1.05469	0.0919012	0.0969271	0.602005	MF11A-1-BL	1	bettong	nose hole	6	5	4	2.75	31.6777	59.8521	63.1253	23.7583
MF11A-1	986	48	45	0	1.05469	0.0919012	0.0969271	0.602005	MF11A-1-BL	2	bettong	nose hole	6	4	2	2.5	13.09	28.2529	29.798	19.635
MF11A-1	986	48	45	0	1.05469	0.0919012	0.0969271	0.602005	MF11A-1-BL	3	bettong	scratch	4	3	0.5	1.75	1.60352	8.72599	9.20319	9.62113
MF11A-1	986	48	45	0	1.05469	0.0919012	0.0969271	0.602005	MF11A-1-BL	4	bettong	nose hole	5	5	4	2.5	26.1799	50.5059	53.268	19.635
MF11A-1	986	48	45	0	1.05469	0.0919012	0.0969271	0.602005	MF11A-1-BL	5	bettong	nose hole	4	4	4	2	16.7552	34.4838	36.3696	12.5664
MF11A-1	986	48	45	0	1.05469	0.0919012	0.0969271	0.602005	MF11A-1-BL	6	bettong	nose hole	2	2	3	1	3.14159	11.3407	11.9609	3.14159
MF11A-1	986	48	45	0	1.05469	0.0919012	0.0969271	0.602005	MF11A-1-BL	7	bettong	root	3	2	3	1.25	4.90874	14.3449	15.1293	4.90874
MF11A-1	986	48	45	0	1.05469	0.0919012	0.0969271	0.602005	MF11A-1-BL	8	bettong	nose hole	6	4	4	2.5	26.1799	50.5059	53.268	19.635
MF11A-1	986	48	45	0	1.05469	0.0919012	0.0969271	0.602005	MF11A-1-BL	9	bettong	nose hole	7	4	2.5	2.75	19.7986	39.6576	41.8264	23.7583
MF11A-1	986	48	45	0	1.05469	0.0919012	0.0969271	0.602005	MF11A-1-BL	10	bettong	nose hole	6	6	4	3	37.6991	70.0885	73.9215	28.2743
MF11A-1	986	48	45	0	1.05469	0.0919012	0.0969271	0.602005	MF11A-1-BL	11	bettong	nose hole	9	6	0.5	3.75	7.36311	18.5173	19.53	44.1786
MF11A-1	986	48	45	0	1.05469	0.0919012	0.0969271	0.602005	MF11A-1-BL	12	unknown	nose hole	2	1.5	4	0.875	3.20704	11.452	12.0783	2.40528
MF11A-1	986	48	45	0	1.05469	0.0919012	0.0969271	0.602005	MF11A-1-BL	13	bettong	nose hole	10	5	2	3.75	29.4524	56.0691	59.1354	44.1786
MF11A-1	986	48	45	0	1.05469	0.0919012	0.0969271	0.602005	MF11A-1-BL	14	bettong	nose hole	7	4	4	2.75	31.6777	59.8521	63.1253	23.7583
MF11A-1	986	48	45	0	1.05469	0.0919012	0.0969271	0.602005	MF11A-1-BL	15	bettong	nose hole	4	4	2.5	2	10.472	23.8024	25.1041	12.5664
MF11A-1	986	48	45	0	1.05469	0.0919012	0.0969271	0.602005	MF11A-1-BL	16	bettong	nose hole	4	4	3	2	12.5664	27.3628	28.8592	12.5664
MF11A-1	986	48	45	0	1.05469	0.0919012	0.0969271	0.602005	MF11A-1-BL	17	bettong	nose hole	7	6	3	3.25	33.1831	62.4112	65.8244	33.1831
MF11A-1	986	48	45	0	1.05469	0.0919012	0.0969271	0.602005	MF11A-1-BL	18	bettong	nose hole	7	5	3	3	28.2743	54.0664	57.0231	28.2743
MF11A-1	986	48	45	0	1.05469	0.0919012	0.0969271	0.602005	MF11A-1-BL	19	bettong	nose hole	4	3	2	1.75	6.41409	16.9039	17.8284	9.62113
MF11A-1	986	48	45	0	1.05469	0.0919012	0.0969271	0.602005	MF11A-1-BL	20	bettong	nose hole	4	3	4	1.75	12.8282	27.8079	29.3286	9.62113
MF11A-1	986	48	45	0	1.05469	0.0919012	0.0969271	0.602005	MF11A-1-BL	21	unknown		7.19	4.91	1.65	3.025	15.8111	32.8789	34.677	28.7475
MF11A-1	986	48	45	0	1.05469	0.0919012	0.0969271	0.602005	MF11A-1-BL	22	unknown		7.19	4.91	1.65	3.025	15.8111	32.8789	34.677	28.7475
MF11A-1	986	48	45	0	1.05469	0.0919012	0.0969271	0.602005	MF11A-1-BL	23	bettong		4.91	3.86	3.12	2.1925	15.7059	32.7	34.4883	15.1018
MF11A-1	986	48	45	0	1.05469	0.0919012	0.0969271	0.602005	MF11A-1-BL	24	bettong		4.91	3.86	3.12	2.1925	15.7059	32.7	34.4883	15.1018
MF11A-1	986	48	45	0	1.05469	0.0919012	0.0969271	0.602005	MF11A-1-BL	25	bettong		4.91	3.86	3.12	2.1925	15.7059	32.7	34.4883	15.1018
MF11A-1	986	48	45	0	1.05469	0.0919012	0.0969271	0.602005	MF11A-1-BL	26	bettong		4.91	3.86	3.12	2.1925	15.7059	32.7	34.4883	15.1018
MF11A-1	986	48	45	0	1.05469	0.0919012	0.0969271	0.602005	MF11A-1-BL	27	bettong		4.91	3.86	3.12	2.1925	15.7059	32.7	34.4883	15.1018
MF11A-1	986	48	45	0	1.05469	0.0919012	0.0969271	0.602005	MF11A-1-BL	28	bettong		4.91	3.86	3.12	2.1925	15.7059	32.7	34.4883	15.1018
MF11A-1	986	48	45	0	1.05469	0.0919012	0.0969271	0.602005	MF11A-1-BL	29	bettong		4.91	3.86	3.12	2.1925	15.7059	32.7	34.4883	15.1018
MF11A-1	986	48	45	0	1.05469	0.0919012	0.0969271	0.602005	MF11A-1-BL	30	bettong		4.91	3.86	3.12	2.1925	15.7059	32.7	34.4883	15.1018
MF11A-1	986	48	45	0	1.05469	0.0919012	0.0969271	0.602005	MF11A-1-BL	31	bettong		4.91	3.86	3.12	2.1925	15.7059	32.7	34.4883	15.1018
MF11A-1	986	48	45	0	1.05469	0.0919012	0.0969271	0.602005	MF11A-1-BL	32	bettong		4.91	3.86	3.12	2.1925	15.7059	32.7	34.4883	15.1018
MF11A-1	986	48	45	0	1.05469	0.0919012	0.0969271	0.602005	MF11A-1-BL	33	bettong		4.91	3.86	3.12	2.1925	15.7059	32.7	34.4883	15.1018
MF11A-1	986	48	45	0	1.05469	0.0919012	0.0969271	0.602005	MF11A-1-BL	34	bettong		4.91	3.86	3.12	2.1925	15.7059	32.7	34.4883	15.1018
MF11A-1	986	48	45	0	1.05469	0.0919012	0.0969271	0.602005	MF11A-1-BL	35	bettong		4.91	3.86	3.12	2.1925	15.7059	32.7	34.4883	15.1018
MF11A-1	986	48	45	0	1.05469	0.0919012	0.0969271	0.602005	MF11A-1-BL	36	bettong		4.91	3.86	3.12	2.1925	15.7059	32.7	34.4883	15.1018
MF11A-1	986	48	45	0	1.05469	0.0919012	0.0969271	0.602005	MF11A-1-BL	37	bettong		4.91	3.86	3.12	2.1925	15.7059	32.7	34.4883	15.1018
MF11A-1	986	48	45	0	1.05469	0.0919012	0.0969271	0.602005	MF11A-1-BL	38	bettong		4.91	3.86	3.12	2.1925	15.7059	32.7	34.4883	15.1018
MF11A-1	986	48	45	0	1.05469	0.0919012	0.0969271	0.602005	MF11A-1-BL	39	bettong		4.91	3.86	3.12	2.1925	15.7059	32.7	34.4883	15.1018
MF11A-1	986	48	45	0	1.05469	0.0919012	0.0969271	0.602005	MF11A-1-BL	40	bettong		4.91	3.86	3.12	2.1925	15.7059	32.7	34.4883	15.1018
MF11A-1	986	48	45	0	1.05469	0.0919012	0.0969271	0.602005	MF11A-1-BL	41	bettong		4.91	3.86	3.12	2.1925	15.7059	32.7	34.4883	15.1018
MF11A-1	986	48	45	0	1.05469	0.0919012	0.0969271	0.602005	MF11A-1-BL	42	bettong		4.91	3.86	3.12	2.1925	15.7059	32.7	34.4883	15.1018
MF11A-1	986	48	45	0	1.05469	0.0919012	0.0969271	0.602005	MF11A-1-BL	43	bettong		4.91	3.86	3.12	2.1925	15.7059	32.7	34.4883	15.1018
MF11A-1	986	48	45	0	1.05469	0.0919012	0.0969271	0.602005	MF11A-1-BL	44	bettong		4.91	3.86	3.12	2.1925	15.7059	32.7	34.4883	15.1018
MF11A-1	986	48	45	0	1.05469	0.0919012	0.0969271	0.602005	MF11A-1-BL	45	bettong		4.91	3.86	3.12	2.1925	15.7059	32.7	34.4883	15.1018
MF11A-1	986	48	45	0	1.05469	0.0919012	0.0969271	0.602005	MF11A-1-BL	46	bettong		4.91	3.86	3.12	2.1925	15.7059	32.7	34.4883	15.1018
MF11A-1	986	48	45	0	1.05469	0.0919012	0.0969271	0.602005	MF11A-1-BL	47	bettong		4.91	3.86	3.12	2.1925	15.7059	32.7	34.4883	15.1018
MF11A-1	986	48	45	0	1.05469	0.0919012	0.0969271	0.602005	MF11A-1-BL	48	bettong		4.91	3.86	3.12	2.1925	15.7059	32.7	34.4883	15.1018
MF11A-1	987	2	1	0	1.12061	0.213308	0.239036	0.577127	MF11A-1-BR	1	unknown	nose hole	6	4	4	2.5	26.1799	50.5059	56.5977	19.635
MF11A-1	987	2	1	0	1.12061	0.213308	0.239036	0.577127	MF11A-1-BR	2	bettong	nose hole	5	3	2.5	2	10.472	23.8024	26.6733	12.5664
MF16A-1	856	5	0	5	0.595145	1.08987	0.648628	0.775417	MF16A-1-AL	1	rabbit	scratch	6	5	1	2.75	7.91943	19.463	11.5833	23.7583
MF16A-1	856	5	0	5	0.595145	1.08987	0.648628	0.775417	MF16A-1-AL	2	rabbit	rabbit	8	5	1.5	3.25	16.5915	34.2056	20.3573	33.1831
MF16A-1	856	5	0	5	0.595145	1.08987	0.648628	0.775417	MF16A-1-AL	3	rabbit	scratch	6	3	1	2.25	5.30144	15.0124	8.93458	15.9043
MF16A-1	856	5	0	5	0.595145	1.08987	0.648628	0.775417	MF16A-1-AL	4	rabbit	leaning cone	7.5	5	4	3.125	40.9062	75.5405	44.9575	30.6796
MF16A-1	856	5	0	5	0.595145	1.08987	0.648628	0.775417	MF16A-1-AL	5	rabbit	rabbit	5.5	4	2	2.375	11.8137	26.0833	15.5233	17.7205
MF16A-1	857	102	93	8	1.17076	0.31902	0.373497	0.558202	MF16A-1-AR	1	rabbit	bowl	11	8	4	4.75	94.5096	166.666	195.127	70.8822
MF16A-1	857	102	93	8	1.17076	0.31902	0.373497	0.558202	MF16A-1-AR	2	bettong	nose hole	6	4	4	2.5	26.1799	50.5059	59.1305	19.635
MF16A-1	857	102	93	8	1.17076	0.31902	0.373497	0.558202	MF16A-1-AR	3	bettong	nose hole	5	4	4	2.25	21.2058	42.0498	49.2304	15.9043
MF16A-1	857	102	93	8	1.17076	0.31902	0.373497	0.558202	MF16A-1-AR	4	bettong	nose hole	3	3	3	1.5	7.06858	18.0166	21.0932	7.06858
MF16A-1	857	102	93	8	1.17076	0.31902	0.373497	0.558202	MF16A-1-AR	5	bettong	nose hole	7	5	3	3	28.2743	54.0664	63.299	28.2743
MF16A-1	857	102	93	8	1.17076	0.31902	0.373497	0.558202	MF16A-1-AR	6	bettong	nose hole	5	3	5	2	20.944	41.6047	48.7093	12.5664
MF16A-1	857	102	93	8	1.17076	0.31902	0.373497	0.558202	MF16A-1-AR	7	bettong	bowl	3	3	1	1.5	2.35619	10.0055	11.7141	7.06858
MF16A-1	857	102	93	8	1.17076	0.31902	0.373497	0.558202	MF16A-1-AR	8	bettong	nose hole	3	3	2	1.5	4.71239	14.0111	16.4036	7.06858
MF16A-1	857	102	93	8	1.17076	0.31902	0.373497	0.558202	MF16A-1-AR	9	bettong	nose hole	4	3	3	1.75	9.62113	22.3559	26.1735	9.62113
MF16A-1	857	102	93	8	1.17076	0.31902	0.373497	0.558202	MF16A-1-AR	10	bettong	nose hole	5	4	5	2.25	26.5072	51.0622	59.7818	15.9043
MF16A-1	857	102	93	8	1.17076	0.31902	0.373497	0.558202	MF16A-1-AR	11	bettong	nose hole	5	4	5	2.25	26.5072	51.0622	59.7818	15.9043
MF16A-1	857	102	93	8	1.17076	0.31902	0.373497	0.558202	MF16A-1-AR	12	bettong	nose hole	4	4	3	2	12.5664	27.3628	32.0354	12.5664
MF16A-1	857	102	93	8	1.17076	0.31902	0.373497	0.558202	MF16A-1-AR	13	bettong	nose hole	4	3	3	1.75	9.62113	22.3559	26.1735	9.62113
MF16A-1	857	102	93	8	1.17076	0.31902	0.373497	0.558202	MF16A-1-AR	14	bettong	nose hole	3	3	3	1.5	7.06858	18.0166	21.0932	7.06858
MF16A-1	857	102	93	8	1.17076	0.31902	0.373497	0.558202	MF16A-1-AR	15	bettong	nose hole	5	4	4	2.25	21.2058	42.0498	49.2304	15.9043
MF16A-1	857	102	93	8	1.17076	0.31902	0.373497	0.558202	MF16A-1-AR	16	bettong	nose hole	6	4	5	2.5	32.7249	61.6324	72.157	19.635
MF16A-1	857	102	93	8	1.17076	0.31902	0.373497	0.558202	MF16A-1-AR	17	bettong	nose hole	5	4	3	2.25	15.9043	33.0373	38.6789	15.9043
MF16A-1	857	102	93	8	1.17076	0.31902	0.373497	0.558202	MF16A-1-AR	18	bettong	nose hole	6	4	5	2.5	32.7249	61.6324	72.157	19.635
MF16A-1	857	102	93	8	1.17076	0.31902	0.373497	0.558202	MF16A-1-AR	19	bettong	bowl	4	4	2	2	8.37758	20.2419	23.6985	12.5664
MF16A-1	857	102	93	8	1.17076	0.31902	0.373497	0.558202	MF16A-1-AR	20	bettong	bowl	7	5	3	3	28.2743	54.0664	63.299	28.2743
MF16A-1	857	102	93	8	1.17076	0.31902	0.373497	0.558202	MF16A-1-AR	21	bettong	nose hole	4	4	3	2	12.5664	27.3628	32.0354	12.5664
MF16A-1	857	102	93	8	1.17076	0.31902	0.373497	0.558202	MF16A-1-AR	22	bettong	nose hole	6	5	3	2.75	23.7583	46.3891	54.3107	23.7583
MF16A-1	857	102	93	8	1.17076	0.31902	0.373497	0.558202	MF16A-1-AR	23	bettong	nose hole	6	4	3	2.5	19.635	39.3794	46.104	19.635
MF16A-1	857	102	93	8	1.17076	0.31902	0.373497	0.558202	MF16A-1-AR	24	bettong	nose hole	6	3	5	2.25	26.5072	51.0622	59.7818	15.9043
MF16A-1	857	102	93	8	1.17076	0.31902	0.373497	0.558202	MF16A-1-AR	25	bettong	nose hole	6	4	6	2.5	39.2699	72.7588	85.1834	19.635
MF16A-1	857	102	93	8	1.17076	0.31902	0.373497	0.558202	MF16A-1-AR	26	bettong	nose hole	4	3	2	1.75	6.41409	16.9039	19.7905	9.62113
MF16A-1	857	102	93	8	1.17076	0.31902	0.373497	0.558202	MF16A-1-AR	27	bettong	nose hole	5	4	5	2.25	26.5072	51.0622	59.7818	15.9043
MF16A-1	857	102	93	8	1.17076	0.31902	0.373497	0.558202	MF16A-1-AR	28	bettong	bowl	7	4	3	2.75	23.7583	46.3891	54.3107	23.7583
MF16A-1	857	102	93	8	1.17076	0.31902	0.373497	0.558202	MF16A-1-AR	29	bettong	nose hole	5	4	5	2.25	26.5072	51.0622	59.7818	15.9043
MF16A-1	857	102	93	8	1.17076	0.31902	0.373497	0.558202	MF16A-1-AR	30	bettong	nose hole	4	4	5	2	20.944	41.6047	48.7093	12.5664
MF16A-1	857	102	93	8	1.17076	0.31902	0.373497	0.558202	MF16A-1-AR	31	bettong	nose hole	4	3	3	1.75	9.62113	22.3559	26.1735	9.62113
MF16A-1	857	102	93	8	1.17076	0.31902	0.373497	0.558202	MF16A-1-AR	32	bettong	nose hole	5	4	5	2.25	26.5072	51.0622	59.7818	15.9043
MF16A-1	857	102	93	8	1.17076	0.31902	0.373497	0.558202	MF16A-1-AR	33	bettong	nose hole	5	3	4	2	16.7552	34.4838	40.3724	12.5664
MF16A-1	857	102	93	8	1.17076	0.31902	0.373497	0.558202	MF16A-1-AR	34	bettong	nose hole	5	5	5	2.5	32.7249	61.6324	72.157	19.635
MF16A-1	857	102	93	8	1.17076	0.31902	0.373497	0.558202	MF16A-1-AR	35	bettong	nose hole	5	3	4	2	16.7552	34.4838	40.3724	12.5664
MF16A-1	857	102	93	8	1.17076	0.31902	0.373497	0.558202	MF16A-1-AR	36	bettong	nose hole	7	4	5	2.75	39.5972	73.3152	85.8348	23.7583
MF16A-1	857	102	93	8	1.17076	0.31902	0.373497	0.558202	MF16A-1-AR	37	bettong	nose hole	6	4	6	2.5	39.2699	72.7588	85.1834	19.635
MF16A-1	857	102	93	8	1.17076	0.31902	0.373497	0.558202	MF16A-1-AR	38	bettong	nose hole	6	4	4	2.5	26.1799	50.5059	59.1305	19.635
MF16A-1	857	102	93	8	1.17076	0.31902	0.373497	0.558202	MF16A-1-AR	39	bettong	nose hole	5	3	4	2	16.7552	34.4838	40.3724	12.5664
MF16A-1	857	102	93	8	1.17076	0.31902	0.373497	0.558202	MF16A-1-AR	40	bettong	nose hole	4	4	7	2	29.3215	55.8466	65.3832	12.5664
MF16A-1	857	102	93	8	1.17076	0.31902	0.373497	0.558202	MF16A-1-AR	41	bettong	nose hole	4	3	5	1.75	16.0352	33.2599	38.9394	9.62113
MF16A-1	857	102	93	8	1.17076	0.31902	0.373497	0.558202	MF16A-1-AR	42	bettong	nose hole	5	3	3	2	12.5664	27.3628	32.0354	12.5664
MF16A-1	857	102	93	8	1.17076	0.31902	0.373497	0.558202	MF16A-1-AR	43	bettong	nose hole	4	3	4	1.75	12.8282	27.8079	32.5565	9.62113
MF16A-1	857	102	93	8	1.17076	0.31902	0.373497	0.558202	MF16A-1-AR	44	bettong	nose hole	3	3	3	1.5	7.06858	18.0166	21.0932	7.06858
MF16A-1	857	102	93	8	1.17076	0.31902	0.373497	0.558202	MF16A-1-AR	45	bettong	nose hole	4	2	3	1.5	7.06858	18.0166	21.0932	7.06858
MF16A-1	857	102	93	8	1.17076	0.31902	0.373497	0.558202	MF16A-1-AR	46	bettong	nose hole	3	3	5	1.5	11.781	26.0277	30.4722	7.06858
MF16A-1	857	102	93	8	1.17076	0.31902	0.373497	0.558202	MF16A-1-AR	47	bettong	nose hole	7	3	7	2.5	45.8149	83.8853	98.2099	19.635
MF16A-1	857	102	93	8	1.17076	0.31902	0.373497	0.558202	MF16A-1-AR	48	bettong	nose hole	3	3	4	1.5	9.42478	22.0221	25.7827	7.06858
MF16A-1	857	102	93	8	1.17076	0.31902	0.373497	0.558202	MF16A-1-AR	49	bettong	nose hole	3	3	6	1.5	14.1372	30.0332	35.1618	7.06858
MF16A-1	857	102	93	8	1.17076	0.31902	0.373497	0.558202	MF16A-1-AR	50	bettong	nose hole	6	4	6	2.5	39.2699	72.7588	85.1834	19.635
MF16A-1	857	102	93	8	1.17076	0.31902	0.373497	0.558202	MF16A-1-AR	51	bettong	nose hole	5	3	5	2	20.944	41.6047	48.7093	12.5664
MF16A-1	857	102	93	8	1.17076	0.31902	0.373497	0.558202	MF16A-1-AR	52	bettong	nose hole	6	5	4	2.75	31.6777	59.8521	70.0727	23.7583
MF16A-1	857	102	93	8	1.17076	0.31902	0.373497	0.558202	MF16A-1-AR	53	bettong	nose hole	7	5	5	3	47.1239	86.1106	100.815	28.2743
MF16A-1	857	102	93	8	1.17076	0.31902	0.373497	0.558202	MF16A-1-AR	54	bettong	nose hole	5	5	5	2.5	32.7249	61.6324	72.157	19.635
MF16A-1	857	102	93	8	1.17076	0.31902	0.373497	0.558202	MF16A-1-AR	55	bettong	nose hole	11	7	7	4.5	148.44	258.348	302.465	63.6173
MF16A-1	857	102	93	8	1.17076	0.31902	0.373497	0.558202	MF16A-1-AR	56	bettong	nose hole	5	5	7	2.5	45.8149	83.8853	98.2099	19.635
MF16A-1	857	102	93	8	1.17076	0.31902	0.373497	0.558202	MF16A-1-AR	57	bettong	bowl	8	8	4	4	67.0206	119.935	140.416	50.2655
MF16A-1	857	102	93	8	1.17076	0.31902	0.373497	0.558202	MF16A-1-AR	58	bettong	bowl	6	5	4	2.75	31.6777	59.8521	70.0727	23.7583
MF16A-1	857	102	93	8	1.17076	0.31902	0.373497	0.558202	MF16A-1-AR	59	bettong	nose hole	6	3	7	2.25	37.1101	69.0871	80.8847	15.9043
MF16A-1	857	102	93	8	1.17076	0.31902	0.373497	0.558202	MF16A-1-AR	60	bettong	nose hole	4	3	3	1.75	9.62113	22.3559	26.1735	9.62113
MF16A-1	857	102	93	8	1.17076	0.31902	0.373497	0.558202	MF16A-1-AR	61	bettong	nose hole	6	4	4	2.5	26.1799	50.5059	59.1305	19.635
MF16A-1	857	102	93	8	1.17076	0.31902	0.373497	0.558202	MF16A-1-AR	62	bettong	nose hole	5	4	6	2.25	31.8086	60.0747	70.3333	15.9043
MF16A-1	857	102	93	8	1.17076	0.31902	0.373497	0.558202	MF16A-1-AR	63	bettong	nose hole	6	4	6	2.5	39.2699	72.7588	85.1834	19.635
MF16A-1	857	102	93	8	1.17076	0.31902	0.373497	0.558202	MF16A-1-AR	64	bettong	nose hole	6	4	6	2.5	39.2699	72.7588	85.1834	19.635
MF16A-1	857	102	93	8	1.17076	0.31902	0.373497	0.558202	MF16A-1-AR	65	bettong	bowl	6	5	4	2.75	31.6777	59.8521	70.0727	23.7583
MF16A-1	857	102	93	8	1.17076	0.31902	0.373497	0.558202	MF16A-1-AR	66	bettong	nose hole	5	5	6	2.5	39.2699	72.7588	85.1834	19.635
MF16A-1	857	102	93	8	1.17076	0.31902	0.373497	0.558202	MF16A-1-AR	67	bettong	nose hole	4	3	6	1.75	19.2423	38.7118	45.3224	9.62113
MF16A-1	857	102	93	8	1.17076	0.31902	0.373497	0.558202	MF16A-1-AR	68	bettong	nose hole	4	3	6	1.75	19.2423	38.7118	45.3224	9.62113
MF16A-1	857	102	93	8	1.17076	0.31902	0.373497	0.558202	MF16A-1-AR	69	bettong	nose hole	4	3	6	1.75	19.2423	38.7118	45.3224	9.62113
MF16A-1	857	102	93	8	1.17076	0.31902	0.373497	0.558202	MF16A-1-AR	70	bettong	nose hole	7	6	10	3.25	110.61	194.037	227.172	33.1831
MF16A-1	857	102	93	8	1.17076	0.31902	0.373497	0.558202	MF16A-1-AR	71	bettong	nose hole	6	5	4	2.75	31.6777	59.8521	70.0727	23.7583
MF16A-1	857	102	93	8	1.17076	0.31902	0.373497	0.558202	MF16A-1-AR	72	bettong	nose hole	5	5	4	2.5	26.1799	50.5059	59.1305	19.635
MF16A-1	857	102	93	8	1.17076	0.31902	0.373497	0.558202	MF16A-1-AR	73	bettong	nose hole	8	4	7	3	65.9734	118.155	138.331	28.2743
MF16A-1	857	102	93	8	1.17076	0.31902	0.373497	0.558202	MF16A-1-AR	74	bettong	bowl	12	7	4	4.75	94.5096	166.666	195.127	70.8822
MF16A-1	857	102	93	8	1.17076	0.31902	0.373497	0.558202	MF16A-1-AR	75	bettong	nose hole	5	5	5	2.5	32.7249	61.6324	72.157	19.635
MF16A-1	857	102	93	8	1.17076	0.31902	0.373497	0.558202	MF16A-1-AR	76	rabbit	rabbit	15	9	4	6	150.796	262.354	307.155	113.097
MF16A-1	857	102	93	8	1.17076	0.31902	0.373497	0.558202	MF16A-1-AR	77	rabbit	bowl	11	9	4	5	104.72	184.024	215.448	78.5398
MF16A-1	857	102	93	8	1.17076	0.31902	0.373497	0.558202	MF16A-1-AR	78	bettong	nose hole	5	3	3	2	12.5664	27.3628	32.0354	12.5664
MF16A-1	857	102	93	8	1.17076	0.31902	0.373497	0.558202	MF16A-1-AR	79	bettong	nose hole	5	4	3	2.25	15.9043	33.0373	38.6789	15.9043
MF16A-1	857	102	93	8	1.17076	0.31902	0.373497	0.558202	MF16A-1-AR	80	rabbit	bowl	13	7	4	5	104.72	184.024	215.448	78.5398
MF16A-1	857	102	93	8	1.17076	0.31902	0.373497	0.558202	MF16A-1-AR	81	rabbit	bowl	10	10	3	5	78.5398	139.518	163.342	78.5398
MF16A-1	857	102	93	8	1.17076	0.31902	0.373497	0.558202	MF16A-1-AR	82	rabbit	rabbit	12	8	2	5	52.3599	95.0118	111.236	78.5398
MF16A-1	857	102	93	8	1.17076	0.31902	0.373497	0.558202	MF16A-1-AR	83	unknown	bowl	6	6	3	3	28.2743	54.0664	63.299	28.2743
MF16A-1	857	102	93	8	1.17076	0.31902	0.373497	0.558202	MF16A-1-AR	84	rabbit	bowl	8	7	3	3.75	44.1786	81.1037	94.9533	44.1786
MF16A-1	857	102	93	8	1.17076	0.31902	0.373497	0.558202	MF16A-1-AR	85	rabbit	rabbit	14	8	5	5.5	158.389	275.261	322.265	95.0332
MF16A-1	857	102	93	8	1.17076	0.31902	0.373497	0.558202	MF16A-1-AR	86	bettong	nose hole	5	4	5	2.25	26.5072	51.0622	59.7818	15.9043
MF16A-1	857	102	93	8	1.17076	0.31902	0.373497	0.558202	MF16A-1-AR	87	bettong	bowl	7	5	3	3	28.2743	54.0664	63.299	28.2743
MF16A-1	857	102	93	8	1.17076	0.31902	0.373497	0.558202	MF16A-1-AR	88	bettong	nose hole	5	4	4	2.25	21.2058	42.0498	49.2304	15.9043
MF16A-1	857	102	93	8	1.17076	0.31902	0.373497	0.558202	MF16A-1-AR	89	bettong	nose hole	5	4	5	2.25	26.5072	51.0622	59.7818	15.9043
MF16A-1	857	102	93	8	1.17076	0.31902	0.373497	0.558202	MF16A-1-AR	90	bettong	nose hole	4	4	5	2	20.944	41.6047	48.7093	12.5664
MF16A-1	857	102	93	8	1.17076	0.31902	0.373497	0.558202	MF16A-1-AR	91	bettong	nose hole	4	7	3	2.75	23.7583	46.3891	54.3107	23.7583
MF16A-1	857	102	93	8	1.17076	0.31902	0.373497	0.558202	MF16A-1-AR	92	bettong	nose hole	5	3	4	2	16.7552	34.4838	40.3724	12.5664
MF16A-1	857	102	93	8	1.17076	0.31902	0.373497	0.558202	MF16A-1-AR	93	bettong	nose hole	5	5	6	2.5	39.2699	72.7588	85.1834	19.635
MF16A-1	857	102	93	8	1.17076	0.31902	0.373497	0.558202	MF16A-1-AR	94	bettong	nose hole	4	3	4	1.75	12.8282	27.8079	32.5565	9.62113
MF16A-1	857	102	93	8	1.17076	0.31902	0.373497	0.558202	MF16A-1-AR	95	bettong	bowl	8	4	3	3	28.2743	54.0664	63.299	28.2743
MF16A-1	857	102	93	8	1.17076	0.31902	0.373497	0.558202	MF16A-1-AR	96	bettong	nose hole	4	3	4	1.75	12.8282	27.8079	32.5565	9.62113
MF16A-1	857	102	93	8	1.17076	0.31902	0.373497	0.558202	MF16A-1-AR	97	bettong	nose hole	5	5	4	2.5	26.1799	50.5059	59.1305	19.635
MF16A-1	857	102	93	8	1.17076	0.31902	0.373497	0.558202	MF16A-1-AR	98	bettong	nose hole	4	3	3	1.75	9.62113	22.3559	26.1735	9.62113
MF16A-1	857	102	93	8	1.17076	0.31902	0.373497	0.558202	MF16A-1-AR	99	bettong	nose hole	5	4	3	2.25	15.9043	33.0373	38.6789	15.9043
MF16A-1	857	102	93	8	1.17076	0.31902	0.373497	0.558202	MF16A-1-AR	100	bettong	bowl	4	4	4	2	16.7552	34.4838	40.3724	12.5664
MF16A-1	857	102	93	8	1.17076	0.31902	0.373497	0.558202	MF16A-1-AR	101	bettong	nose hole	3	3	3	1.5	7.06858	18.0166	21.0932	7.06858
MF16A-1	857	102	93	8	1.17076	0.31902	0.373497	0.558202	MF16A-1-AR	102	bettong	nose hole	4	3	4	1.75	12.8282	27.8079	32.5565	9.62113
MF16A-1	859	16	6	0	0.746994	0.990925	0.740215	0.718115	MF16A-1-BL	1	bettong	bowl	4	4	1	2	4.18879	13.1209	9.80127	12.5664
MF16A-1	859	16	6	0	0.746994	0.990925	0.740215	0.718115	MF16A-1-BL	2	bird	scratch	4	4	1	2	4.18879	13.1209	9.80127	12.5664
MF16A-1	859	16	6	0	0.746994	0.990925	0.740215	0.718115	MF16A-1-BL	3	bird	nose hole	2	2	2	1	2.0944	9.56047	7.14162	3.14159
MF16A-1	859	16	6	0	0.746994	0.990925	0.740215	0.718115	MF16A-1-BL	4	bettong	bowl	6	5	2	2.75	15.8389	32.9261	24.5956	23.7583
MF16A-1	859	16	6	0	0.746994	0.990925	0.740215	0.718115	MF16A-1-BL	5	bettong	nose hole	5	4	4	2.25	21.2058	42.0498	31.4109	15.9043
MF16A-1	859	16	6	0	0.746994	0.990925	0.740215	0.718115	MF16A-1-BL	6	bird	scratch	22	8	1	7.5	58.9049	106.138	79.2847	176.715
MF16A-1	859	16	6	0	0.746994	0.990925	0.740215	0.718115	MF16A-1-BL	7	bird	scratch	13	5	1	4.5	21.2058	42.0498	31.4109	63.6173
MF16A-1	859	16	6	0	0.746994	0.990925	0.740215	0.718115	MF16A-1-BL	8	bettong	root	5	5	3	2.5	19.635	39.3794	29.4162	19.635
MF16A-1	859	16	6	0	0.746994	0.990925	0.740215	0.718115	MF16A-1-BL	9	bird	scratch	4	2	2	1.5	4.71239	14.0111	10.4662	7.06858
MF16A-1	859	16	6	0	0.746994	0.990925	0.740215	0.718115	MF16A-1-BL	10	unknown	scratch	10	6	1	4	16.7552	34.4838	25.7592	50.2655
MF16A-1	859	16	6	0	0.746994	0.990925	0.740215	0.718115	MF16A-1-BL	11	unknown	scratch	13	11	1	6	37.6991	70.0885	52.3557	113.097
MF16A-1	859	16	6	0	0.746994	0.990925	0.740215	0.718115	MF16A-1-BL	12	bird	root	6	3	3	2.25	15.9043	33.0373	24.6787	15.9043
MF16A-1	859	16	6	0	0.746994	0.990925	0.740215	0.718115	MF16A-1-BL	13	bird	scratch	7	5	0	3	0	6	4.48197	28.2743
MF16A-1	859	16	6	0	0.746994	0.990925	0.740215	0.718115	MF16A-1-BL	14	bird	scratch	8	5	1	3.25	11.061	24.8037	18.5283	33.1831
MF16A-1	859	16	6	0	0.746994	0.990925	0.740215	0.718115	MF16A-1-BL	15	bettong	nose hole	5	5	2	2.5	13.09	28.2529	21.1048	19.635
MF16A-1	859	16	6	0	0.746994	0.990925	0.740215	0.718115	MF16A-1-BL	16	bettong	root	3	4	3	1.75	9.62113	22.3559	16.6997	9.62113
MF16A-1	858	54	39	14	1.40153	0.132185	0.185262	0.471121	MF16A-1-BR	1	bettong	scratch	4	3	0	1.75	0	6	8.40917	9.62113
MF16A-1	858	54	39	14	1.40153	0.132185	0.185262	0.471121	MF16A-1-BR	2	bettong	scratch	5	6	0	2.75	0	6	8.40917	23.7583
MF16A-1	858	54	39	14	1.40153	0.132185	0.185262	0.471121	MF16A-1-BR	3	bettong	nose hole	3	2	2	1.25	3.27249	11.5632	16.2062	4.90874
MF16A-1	858	54	39	14	1.40153	0.132185	0.185262	0.471121	MF16A-1-BR	4	bettong	scratch	5	3	1	2	4.18879	13.1209	18.3894	12.5664
MF16A-1	858	54	39	14	1.40153	0.132185	0.185262	0.471121	MF16A-1-BR	5	rabbit	rabbit	12	8	3	5	78.5398	139.518	195.538	78.5398
MF16A-1	858	54	39	14	1.40153	0.132185	0.185262	0.471121	MF16A-1-BR	6	bettong	nose hole	4	3	4	1.75	12.8282	27.8079	38.9736	9.62113
MF16A-1	858	54	39	14	1.40153	0.132185	0.185262	0.471121	MF16A-1-BR	7	bettong	nose hole	5	3	5	2	20.944	41.6047	58.3102	12.5664
MF16A-1	858	54	39	14	1.40153	0.132185	0.185262	0.471121	MF16A-1-BR	8	bettong	nose hole	5	3	4	2	16.7552	34.4838	48.33	12.5664
MF16A-1	858	54	39	14	1.40153	0.132185	0.185262	0.471121	MF16A-1-BR	9	bettong	nose hole	6	3	3	2.25	15.9043	33.0373	46.3028	15.9043
MF16A-1	858	54	39	14	1.40153	0.132185	0.185262	0.471121	MF16A-1-BR	10	bettong	nose hole	5	4	5	2.25	26.5072	51.0622	71.5652	15.9043
MF16A-1	858	54	39	14	1.40153	0.132185	0.185262	0.471121	MF16A-1-BR	11	bettong	nose hole	5	3	5	2	20.944	41.6047	58.3102	12.5664
MF16A-1	858	54	39	14	1.40153	0.132185	0.185262	0.471121	MF16A-1-BR	12	bettong	nose hole	7	4	6	2.75	47.5166	86.7782	121.622	23.7583
MF16A-1	858	54	39	14	1.40153	0.132185	0.185262	0.471121	MF16A-1-BR	13	bettong	nose hole	6	5	4	2.75	31.6777	59.8521	83.8845	23.7583
MF16A-1	858	54	39	14	1.40153	0.132185	0.185262	0.471121	MF16A-1-BR	14	bettong	nose hole	5	4	4	2.25	21.2058	42.0498	58.934	15.9043
MF16A-1	858	54	39	14	1.40153	0.132185	0.185262	0.471121	MF16A-1-BR	15	bettong	nose hole	5	4	3	2.25	15.9043	33.0373	46.3028	15.9043
MF16A-1	858	54	39	14	1.40153	0.132185	0.185262	0.471121	MF16A-1-BR	16	bettong	nose hole	5	3	4	2	16.7552	34.4838	48.33	12.5664
MF16A-1	858	54	39	14	1.40153	0.132185	0.185262	0.471121	MF16A-1-BR	17	bettong	nose hole	5	4	4	2.25	21.2058	42.0498	58.934	15.9043
MF16A-1	858	54	39	14	1.40153	0.132185	0.185262	0.471121	MF16A-1-BR	18	bettong	nose hole	6	5	4	2.75	31.6777	59.8521	83.8845	23.7583
MF16A-1	858	54	39	14	1.40153	0.132185	0.185262	0.471121	MF16A-1-BR	19	bettong	nose hole	6	4	4	2.5	26.1799	50.5059	70.7855	19.635
MF16A-1	858	54	39	14	1.40153	0.132185	0.185262	0.471121	MF16A-1-BR	20	bettong	nose hole	4	4	4	2	16.7552	34.4838	48.33	12.5664
MF16A-1	858	54	39	14	1.40153	0.132185	0.185262	0.471121	MF16A-1-BR	21	bettong	nose hole	4	3	4	1.75	12.8282	27.8079	38.9736	9.62113
MF16A-1	858	54	39	14	1.40153	0.132185	0.185262	0.471121	MF16A-1-BR	22	bettong	rabbit	12	5	2	4.25	37.83	70.311	98.5429	56.745
MF16A-1	858	54	39	14	1.40153	0.132185	0.185262	0.471121	MF16A-1-BR	23	bettong	nose hole	4	4	4	2	16.7552	34.4838	48.33	12.5664
MF16A-1	858	54	39	14	1.40153	0.132185	0.185262	0.471121	MF16A-1-BR	24	bettong	leaning cone	9	6	4	3.75	58.9049	106.138	148.756	44.1786
MF16A-1	858	54	39	14	1.40153	0.132185	0.185262	0.471121	MF16A-1-BR	25	bettong	nose hole	4	4	5	2	20.944	41.6047	58.3102	12.5664
MF16A-1	858	54	39	14	1.40153	0.132185	0.185262	0.471121	MF16A-1-BR	26	bettong	bowl	8	5	5	3.25	55.3051	100.019	140.179	33.1831
MF16A-1	858	54	39	14	1.40153	0.132185	0.185262	0.471121	MF16A-1-BR	27	bettong	nose hole	4	3	3	1.75	9.62113	22.3559	31.3325	9.62113
MF16A-1	858	54	39	14	1.40153	0.132185	0.185262	0.471121	MF16A-1-BR	28	bettong	nose hole	6	5	6	2.75	47.5166	86.7782	121.622	23.7583
MF16A-1	858	54	39	14	1.40153	0.132185	0.185262	0.471121	MF16A-1-BR	29	bettong	nose hole	4	4	3	2	12.5664	27.3628	38.3498	12.5664
MF16A-1	858	54	39	14	1.40153	0.132185	0.185262	0.471121	MF16A-1-BR	30	bettong	nose hole	5	4	4	2.25	21.2058	42.0498	58.934	15.9043
MF16A-1	858	54	39	14	1.40153	0.132185	0.185262	0.471121	MF16A-1-BR	31	rabbit	rabbit	12	7	4	4.75	94.5096	166.666	233.588	70.8822
MF16A-1	858	54	39	14	1.40153	0.132185	0.185262	0.471121	MF16A-1-BR	32	rabbit	rabbit	10	5	4	3.75	58.9049	106.138	148.756	44.1786
MF16A-1	858	54	39	14	1.40153	0.132185	0.185262	0.471121	MF16A-1-BR	33	bettong	nose hole	5	3	3	2	12.5664	27.3628	38.3498	12.5664
MF16A-1	858	54	39	14	1.40153	0.132185	0.185262	0.471121	MF16A-1-BR	34	bettong	nose hole	6	5	5	2.75	39.5972	73.3152	102.753	23.7583
MF16A-1	858	54	39	14	1.40153	0.132185	0.185262	0.471121	MF16A-1-BR	35	bettong	nose hole	5	4	5	2.25	26.5072	51.0622	71.5652	15.9043
MF16A-1	858	54	39	14	1.40153	0.132185	0.185262	0.471121	MF16A-1-BR	36	bettong	nose hole	5	4	4	2.25	21.2058	42.0498	58.934	15.9043
MF16A-1	858	54	39	14	1.40153	0.132185	0.185262	0.471121	MF16A-1-BR	37	bettong	nose hole	7	6	5	3.25	55.3051	100.019	140.179	33.1831
MF16A-1	858	54	39	14	1.40153	0.132185	0.185262	0.471121	MF16A-1-BR	38	bettong	nose hole	3	2	3	1.25	4.90874	14.3449	20.1047	4.90874
MF16A-1	858	54	39	14	1.40153	0.132185	0.185262	0.471121	MF16A-1-BR	39	rabbit	bowl	8	6	3	3.5	38.4845	71.4237	100.102	38.4845
MF16A-1	858	54	39	14	1.40153	0.132185	0.185262	0.471121	MF16A-1-BR	40	bettong	nose hole	3	3	5	1.5	11.781	26.0277	36.4785	7.06858
MF16A-1	858	54	39	14	1.40153	0.132185	0.185262	0.471121	MF16A-1-BR	41	bettong	nose hole	3	3	3	1.5	7.06858	18.0166	25.2508	7.06858
MF16A-1	858	54	39	14	1.40153	0.132185	0.185262	0.471121	MF16A-1-BR	42	rabbit	rabbit	12	5	3	4.25	56.745	102.467	143.61	56.745
MF16A-1	858	54	39	14	1.40153	0.132185	0.185262	0.471121	MF16A-1-BR	43	bettong	nose hole	4	2	3	1.5	7.06858	18.0166	25.2508	7.06858
MF16A-1	858	54	39	14	1.40153	0.132185	0.185262	0.471121	MF16A-1-BR	44	rabbit	rabbit	8	5	2	3.25	22.122	43.6075	61.1172	33.1831
MF16A-1	858	54	39	14	1.40153	0.132185	0.185262	0.471121	MF16A-1-BR	45	bettong	nose hole	4	3	3	1.75	9.62113	22.3559	31.3325	9.62113
MF16A-1	858	54	39	14	1.40153	0.132185	0.185262	0.471121	MF16A-1-BR	46	rabbit	bowl	8	7	2	3.75	29.4524	56.0691	78.5825	44.1786
MF16A-1	858	54	39	14	1.40153	0.132185	0.185262	0.471121	MF16A-1-BR	47	rabbit	rabbit	12	8	5	5	130.9	228.529	320.291	78.5398
MF16A-1	858	54	39	14	1.40153	0.132185	0.185262	0.471121	MF16A-1-BR	48	rabbit	rabbit	15	7	5	5.5	158.389	275.261	385.786	95.0332
MF16A-1	858	54	39	14	1.40153	0.132185	0.185262	0.471121	MF16A-1-BR	49	rabbit	scratch	10	5	1	3.75	14.7262	31.0346	43.4958	44.1786
MF16A-1	858	54	39	14	1.40153	0.132185	0.185262	0.471121	MF16A-1-BR	50	rabbit	rabbit	10	5	2	3.75	29.4524	56.0691	78.5825	44.1786
MF16A-1	858	54	39	14	1.40153	0.132185	0.185262	0.471121	MF16A-1-BR	51	rabbit	rabbit	7	4	2	2.75	15.8389	32.9261	46.1468	23.7583
MF16A-1	858	54	39	14	1.40153	0.132185	0.185262	0.471121	MF16A-1-BR	52	rabbit	scratch	8	6	1	3.5	12.8282	27.8079	38.9736	38.4845
MF16A-1	858	54	39	14	1.40153	0.132185	0.185262	0.471121	MF16A-1-BR	53	rabbit	scratch	8	8	0	4	0	6	8.40917	50.2655
MF16A-1	858	54	39	14	1.40153	0.132185	0.185262	0.471121	MF16A-1-BR	54	unknown	scratch	8	4	2	3	18.8496	38.0442	53.3201	28.2743
MF16A-2	0	2	0	0					MF16A-2-AL	1	unknown	nose hole	5	2	3	1.75	9.62113	22.3559	0	9.62113
MF16A-2	0	2	0	0					MF16A-2-AL	2	unknown	scratch	8	6	1	3.5	12.8282	27.8079	0	38.4845
MF16A-2	0	43	33	0					MF16A-2-AR	1	bettong	nose hole	3.5	3.5	3	1.75	9.62113	22.3559	0	9.62113
MF16A-2	0	43	33	0					MF16A-2-AR	2	unknown	scratch	7	4.5	0.5	2.875	4.32787	13.3574	0	25.9672
MF16A-2	0	43	33	0					MF16A-2-AR	3	bettong	nose hole	3	3	2	1.5	4.71239	14.0111	0	7.06858
MF16A-2	0	43	33	0					MF16A-2-AR	4	bettong	nose hole	3	3	2.5	1.5	5.89049	16.0138	0	7.06858
MF16A-2	0	43	33	0					MF16A-2-AR	5	unknown	scratch	5	3	1	2	4.18879	13.1209	0	12.5664
MF16A-2	0	43	33	0					MF16A-2-AR	6	bettong	nose hole	3	3.5	3.5	1.625	9.6784	22.4533	0	8.29577
MF16A-2	0	43	33	0					MF16A-2-AR	7	bettong	scratch	4	3	1	1.75	3.20704	11.452	0	9.62113
MF16A-2	0	43	33	0					MF16A-2-AR	8	bettong	nose hole	3	3	2	1.5	4.71239	14.0111	0	7.06858
MF16A-2	0	43	33	0					MF16A-2-AR	9	bettong	nose hole	3	2.5	1.5	1.375	2.96979	11.0486	0	5.93957
MF16A-2	0	43	33	0					MF16A-2-AR	10	unknown	bowl	4	3.5	2	1.875	7.36311	18.5173	0	11.0447
MF16A-2	0	43	33	0					MF16A-2-AR	11	unknown	scratch	5	3.5	1.5	2.125	7.09313	18.0583	0	14.1863
MF16A-2	0	43	33	0					MF16A-2-AR	12	unknown	scratch	7	4	1	2.75	7.91943	19.463	0	23.7583
MF16A-2	0	43	33	0					MF16A-2-AR	13	bettong	nose hole	2	2	1.5	1	1.5708	8.67035	0	3.14159
MF16A-2	0	43	33	0					MF16A-2-AR	14	bettong	nose hole	3	2.5	1.5	1.375	2.96979	11.0486	0	5.93957
MF16A-2	0	43	33	0					MF16A-2-AR	15	bettong	nose hole	5	4	4	2.25	21.2058	42.0498	0	15.9043
MF16A-2	0	43	33	0					MF16A-2-AR	16	bettong	nose hole	2.5	2.5	2	1.25	3.27249	11.5632	0	4.90874
MF16A-2	0	43	33	0					MF16A-2-AR	17	bettong	nose hole	3	3	4	1.5	9.42478	22.0221	0	7.06858
MF16A-2	0	43	33	0					MF16A-2-AR	18	unknown	bowl	5	3.5	1.5	2.125	7.09313	18.0583	0	14.1863
MF16A-2	0	43	33	0					MF16A-2-AR	19	bettong	nose hole	3	2	2.5	1.25	4.09062	12.954	0	4.90874
MF16A-2	0	43	33	0					MF16A-2-AR	20	bettong	nose hole	2	2	2.5	1	2.61799	10.4506	0	3.14159
MF16A-2	0	43	33	0					MF16A-2-AR	21	bettong	nose hole	2.5	2	2	1.125	2.65072	10.5062	0	3.97608
MF16A-2	0	43	33	0					MF16A-2-AR	22	bettong	nose hole	2.5	2	1.5	1.125	1.98804	9.37967	0	3.97608
MF16A-2	0	43	33	0					MF16A-2-AR	23	bettong	nose hole	3.5	3	2	1.625	5.53051	15.4019	0	8.29577
MF16A-2	0	43	33	0					MF16A-2-AR	24	bettong	nose hole	3	3	2	1.5	4.71239	14.0111	0	7.06858
MF16A-2	0	43	33	0					MF16A-2-AR	25	bettong	nose hole	2.5	2	2	1.125	2.65072	10.5062	0	3.97608
MF16A-2	0	43	33	0					MF16A-2-AR	26	bettong	nose hole	2.5	2	1.5	1.125	1.98804	9.37967	0	3.97608
MF16A-2	0	43	33	0					MF16A-2-AR	27	bettong	root	3.5	2.5	2	1.5	4.71239	14.0111	0	7.06858
MF16A-2	0	43	33	0					MF16A-2-AR	28	bettong	nose hole	2	2	1.5	1	1.5708	8.67035	0	3.14159
MF16A-2	0	43	33	0					MF16A-2-AR	29	bettong	nose hole	2.5	2.5	1.5	1.25	2.45437	10.1724	0	4.90874
MF16A-2	0	43	33	0					MF16A-2-AR	30	bettong	nose hole	4.5	3	2	1.875	7.36311	18.5173	0	11.0447
MF16A-2	0	43	33	0					MF16A-2-AR	31	bettong	nose hole	3	3	3	1.5	7.06858	18.0166	0	7.06858
MF16A-2	0	43	33	0					MF16A-2-AR	32	bettong	nose hole	2.5	2	2	1.125	2.65072	10.5062	0	3.97608
MF16A-2	0	43	33	0					MF16A-2-AR	33	bettong	nose hole	2.5	2	2.5	1.125	3.3134	11.6328	0	3.97608
MF16A-2	0	43	33	0					MF16A-2-AR	34	unknown	nose hole	4	2	2	1.5	4.71239	14.0111	0	7.06858
MF16A-2	0	43	33	0					MF16A-2-AR	35	unknown	nose hole	5	3	1	2	4.18879	13.1209	0	12.5664
MF16A-2	0	43	33	0					MF16A-2-AR	36	bird	nose hole	3	2	2	1.25	3.27249	11.5632	0	4.90874
MF16A-2	0	43	33	0					MF16A-2-AR	37	bird	nose hole	4	3	4	1.75	12.8282	27.8079	0	9.62113
MF16A-2	0	43	33	0					MF16A-2-AR	38	bettong	nose hole	5	3	4	2	16.7552	34.4838	0	12.5664
MF16A-2	0	43	33	0					MF16A-2-AR	39	bettong	nose hole	8	4	4	3	37.6991	70.0885	0	28.2743
MF16A-2	0	43	33	0					MF16A-2-AR	40	bettong	nose hole	5	3	4	2	16.7552	34.4838	0	12.5664
MF16A-2	0	43	33	0					MF16A-2-AR	41	bettong	nose hole	5	3	4	2	16.7552	34.4838	0	12.5664
MF16A-2	0	43	33	0					MF16A-2-AR	42	bettong	nose hole	6	3	4	2.25	21.2058	42.0498	0	15.9043
MF16A-2	0	43	33	0					MF16A-2-AR	43	bettong	nose hole	6	3	4	2.25	21.2058	42.0498	0	15.9043
MF16A-2	0	4	0	1					MF16A-2-BL	1	rabbit	bowl	6	4.5	3.5	2.625	25.2555	48.9343	0	21.6475
MF16A-2	0	4	0	1					MF16A-2-BL	2	unknown	bowl	6	5	3	2.75	23.7583	46.3891	0	23.7583
MF16A-2	0	4	0	1					MF16A-2-BL	3	unknown	scratch	30	3.5	1	8.375	73.4511	130.867	0	220.353
MF16A-2	0	4	0	1					MF16A-2-BL	4	unknown	rabbit	6	4	1.5	2.5	9.81748	22.6897	0	19.635
MF16A-2	0	13	5	1					MF16A-2-BR	1	rabbit	bowl	5.5	4	1.5	2.375	8.86027	21.0625	0	17.7205
MF16A-2	0	13	5	1					MF16A-2-BR	2	bettong	root	4	3	2	1.75	6.41409	16.9039	0	9.62113
MF16A-2	0	13	5	1					MF16A-2-BR	3	bettong	nose hole	3	2	1.5	1.25	2.45437	10.1724	0	4.90874
MF16A-2	0	13	5	1					MF16A-2-BR	4	bird	nose hole	3	2	1.5	1.25	2.45437	10.1724	0	4.90874
MF16A-2	0	13	5	1					MF16A-2-BR	5	bird	nose hole	3.5	1.5	2	1.25	3.27249	11.5632	0	4.90874
MF16A-2	0	13	5	1					MF16A-2-BR	6	bird	nose hole	2.5	2	1.5	1.125	1.98804	9.37967	0	3.97608
MF16A-2	0	13	5	1					MF16A-2-BR	7	bird	nose hole	3	2.5	2	1.375	3.95972	12.7315	0	5.93957
MF16A-2	0	13	5	1					MF16A-2-BR	8	bird	nose hole	4	3	2.5	1.75	8.01761	19.6299	0	9.62113
MF16A-2	0	13	5	1					MF16A-2-BR	9	bird	nose hole	3	3	2	1.5	4.71239	14.0111	0	7.06858
MF16A-2	0	13	5	1					MF16A-2-BR	10	bird	scratch	4	4	1	2	4.18879	13.1209	0	12.5664
MF16A-2	0	13	5	1					MF16A-2-BR	11	bettong	nose hole	3	2.5	1.5	1.375	2.96979	11.0486	0	5.93957
MF16A-2	0	13	5	1					MF16A-2-BR	12	bettong	nose hole	3	2.5	1.5	1.375	2.96979	11.0486	0	5.93957
MF16A-2	0	13	5	1					MF16A-2-BR	13	bettong	nose hole	2.5	2	1	1.125	1.32536	8.25311	0	3.97608
MF11A-4	1032	10	3	0	0.925002	0.347428	0.321372	0.650943	MF11A-4-AL	1	unknown	scratch	25	6	0.5	7.75	31.4487	59.4627	55.0031	188.692
MF11A-4	1032	10	3	0	0.925002	0.347428	0.321372	0.650943	MF11A-4-AL	2	bird	nose hole	2.5	2	1	1.125	1.32536	8.25311	7.63414	3.97608
MF11A-4	1032	10	3	0	0.925002	0.347428	0.321372	0.650943	MF11A-4-AL	3	unknown	nose hole	3	3	1.5	1.5	3.53429	12.0083	11.1077	7.06858
MF11A-4	1032	10	3	0	0.925002	0.347428	0.321372	0.650943	MF11A-4-AL	4	bird	nose hole	3	2	3	1.25	4.90874	14.3449	13.269	4.90874
MF11A-4	1032	10	3	0	0.925002	0.347428	0.321372	0.650943	MF11A-4-AL	5	bettong	nose hole	6	5	2	2.75	15.8389	32.9261	30.4567	23.7583
MF11A-4	1032	10	3	0	0.925002	0.347428	0.321372	0.650943	MF11A-4-AL	6	bird	nose hole	3	3	2	1.5	4.71239	14.0111	12.9603	7.06858
MF11A-4	1032	10	3	0	0.925002	0.347428	0.321372	0.650943	MF11A-4-AL	7	bird	nose hole	3	2	3	1.25	4.90874	14.3449	13.269	4.90874
MF11A-4	1032	10	3	0	0.925002	0.347428	0.321372	0.650943	MF11A-4-AL	8	bettong	nose hole	6	5	3	2.75	23.7583	46.3891	42.91	23.7583
MF11A-4	1032	10	3	0	0.925002	0.347428	0.321372	0.650943	MF11A-4-AL	9	bird	nose hole	6	4	4	2.5	26.1799	50.5059	46.7181	19.635
MF11A-4	1032	10	3	0	0.925002	0.347428	0.321372	0.650943	MF11A-4-AL	10	bettong	nose hole	6	4.5	3	2.625	21.6475	42.8008	39.5908	21.6475
MF11A-4	1033	20	16	0	1.019	0.0962056	0.098033	0.615474	MF11A-4-AR	1	bettong	bowl	4	3.5	1.5	1.875	5.52233	15.388	15.6803	11.0447
MF11A-4	1033	20	16	0	1.019	0.0962056	0.098033	0.615474	MF11A-4-AR	2	unknown	bowl	2.5	2.5	1.5	1.25	2.45437	10.1724	10.3657	4.90874
MF11A-4	1033	20	16	0	1.019	0.0962056	0.098033	0.615474	MF11A-4-AR	3	bettong	leaning cone	4	4	3.5	2	14.6608	30.9233	31.5107	12.5664
MF11A-4	1033	20	16	0	1.019	0.0962056	0.098033	0.615474	MF11A-4-AR	4	bettong	bowl	3.5	3.5	3	1.75	9.62113	22.3559	22.7806	9.62113
MF11A-4	1033	20	16	0	1.019	0.0962056	0.098033	0.615474	MF11A-4-AR	5	bettong	leaning cone	4	3	2.5	1.75	8.01761	19.6299	20.0028	9.62113
MF11A-4	1033	20	16	0	1.019	0.0962056	0.098033	0.615474	MF11A-4-AR	6	unknown	leaning cone	3.5	2	1.5	1.375	2.96979	11.0486	11.2585	5.93957
MF11A-4	1033	20	16	0	1.019	0.0962056	0.098033	0.615474	MF11A-4-AR	7	bettong	leaning cone	3.5	3.5	3	1.75	9.62113	22.3559	22.7806	9.62113
MF11A-4	1033	20	16	0	1.019	0.0962056	0.098033	0.615474	MF11A-4-AR	8	bettong	bowl	2.5	2.5	3	1.25	4.90874	14.3449	14.6173	4.90874
MF11A-4	1033	20	16	0	1.019	0.0962056	0.098033	0.615474	MF11A-4-AR	9	bettong	bowl	3.5	3	2.5	1.625	6.91314	17.7523	18.0895	8.29577
MF11A-4	1033	20	16	0	1.019	0.0962056	0.098033	0.615474	MF11A-4-AR	10	bettong	leaning cone	3	2	2	1.25	3.27249	11.5632	11.7829	4.90874
MF11A-4	1033	20	16	0	1.019	0.0962056	0.098033	0.615474	MF11A-4-AR	11	bettong	leaning cone	3	2.5	2	1.375	3.95972	12.7315	12.9734	5.93957
MF11A-4	1033	20	16	0	1.019	0.0962056	0.098033	0.615474	MF11A-4-AR	12	unknown	scratch	6.5	5	1	2.875	8.65574	20.7148	21.1082	25.9672
MF11A-4	1033	20	16	0	1.019	0.0962056	0.098033	0.615474	MF11A-4-AR	13	bettong	leaning cone	4	3	2	1.75	6.41409	16.9039	17.225	9.62113
MF11A-4	1033	20	16	0	1.019	0.0962056	0.098033	0.615474	MF11A-4-AR	14	bettong	rabbit	6.5	3	2	2.375	11.8137	26.0833	26.5787	17.7205
MF11A-4	1033	20	16	0	1.019	0.0962056	0.098033	0.615474	MF11A-4-AR	15	unknown	leaning cone	3.5	2	1.5	1.375	2.96979	11.0486	11.2585	5.93957
MF11A-4	1033	20	16	0	1.019	0.0962056	0.098033	0.615474	MF11A-4-AR	16	bettong	leaning cone	3	2.5	1.5	1.375	2.96979	11.0486	11.2585	5.93957
MF11A-4	1033	20	16	0	1.019	0.0962056	0.098033	0.615474	MF11A-4-AR	17	bettong	leaning cone	4	3	2	1.75	6.41409	16.9039	17.225	9.62113
MF11A-4	1033	20	16	0	1.019	0.0962056	0.098033	0.615474	MF11A-4-AR	18	bettong	leaning cone	3.5	3.5	1	1.75	3.20704	11.452	11.6695	9.62113
MF11A-4	1033	20	16	0	1.019	0.0962056	0.098033	0.615474	MF11A-4-AR	19	bettong	scratch	2.5	2	0.5	1.125	0.66268	7.12656	7.26192	3.97608
MF11A-4	1033	20	16	0	1.019	0.0962056	0.098033	0.615474	MF11A-4-AR	20	bettong	leaning cone	3	2.5	1	1.375	1.97986	9.36576	9.54366	5.93957
MF11A-4	1034	18	10	2	1.15413	0.0657188	0.0758482	0.564478	MF11A-4-BL	1	rabbit	scratch	10	5	0.5	3.75	7.36311	18.5173	21.3714	44.1786
MF11A-4	1034	18	10	2	1.15413	0.0657188	0.0758482	0.564478	MF11A-4-BL	2	rabbit	scratch	13	5	0.5	4.5	10.6029	24.0249	27.7279	63.6173
MF11A-4	1034	18	10	2	1.15413	0.0657188	0.0758482	0.564478	MF11A-4-BL	3	unknown	bowl	4	3.5	2.5	1.875	9.20388	21.6466	24.9831	11.0447
MF11A-4	1034	18	10	2	1.15413	0.0657188	0.0758482	0.564478	MF11A-4-BL	4	bettong	leaning cone	5	3.5	3	2.125	14.1863	30.1166	34.7586	14.1863
MF11A-4	1034	18	10	2	1.15413	0.0657188	0.0758482	0.564478	MF11A-4-BL	5	bettong	leaning cone	5	3.5	2.5	2.125	11.8219	26.0972	30.1197	14.1863
MF11A-4	1034	18	10	2	1.15413	0.0657188	0.0758482	0.564478	MF11A-4-BL	6	unknown	leaning cone	5	3.5	1	2.125	4.72875	14.0389	16.2027	14.1863
MF11A-4	1034	18	10	2	1.15413	0.0657188	0.0758482	0.564478	MF11A-4-BL	7	bettong	bowl	4	3	2	1.75	6.41409	16.9039	19.5094	9.62113
MF11A-4	1034	18	10	2	1.15413	0.0657188	0.0758482	0.564478	MF11A-4-BL	8	bettong	bowl	3	3	2	1.5	4.71239	14.0111	16.1706	7.06858
MF11A-4	1034	18	10	2	1.15413	0.0657188	0.0758482	0.564478	MF11A-4-BL	9	unknown	scratch	4	2.5	1	1.625	2.76526	10.7009	12.3503	8.29577
MF11A-4	1034	18	10	2	1.15413	0.0657188	0.0758482	0.564478	MF11A-4-BL	10	bird	nose hole	2	2	4	1	4.18879	13.1209	15.1433	3.14159
MF11A-4	1034	18	10	2	1.15413	0.0657188	0.0758482	0.564478	MF11A-4-BL	11	unknown	scratch	5	4	1	2.25	5.30144	15.0124	17.3264	15.9043
MF11A-4	1034	18	10	2	1.15413	0.0657188	0.0758482	0.564478	MF11A-4-BL	12	unknown	rabbit	5	2.5	2	1.875	7.36311	18.5173	21.3714	11.0447
MF11A-4	1034	18	10	2	1.15413	0.0657188	0.0758482	0.564478	MF11A-4-BL	13	bettong	bowl	4	4.5	3.5	2.125	16.5506	34.1361	39.3976	14.1863
MF11A-4	1034	18	10	2	1.15413	0.0657188	0.0758482	0.564478	MF11A-4-BL	14	bettong	leaning cone	4.5	4	3	2.125	14.1863	30.1166	34.7586	14.1863
MF11A-4	1034	18	10	2	1.15413	0.0657188	0.0758482	0.564478	MF11A-4-BL	15	bettong	bowl	3.5	3	2	1.625	5.53051	15.4019	17.7758	8.29577
MF11A-4	1034	18	10	2	1.15413	0.0657188	0.0758482	0.564478	MF11A-4-BL	16	bettong	bowl	4.5	3.5	2.5	2	10.472	23.8024	27.4711	12.5664
MF11A-4	1034	18	10	2	1.15413	0.0657188	0.0758482	0.564478	MF11A-4-BL	17	bettong	bowl	3	3	2	1.5	4.71239	14.0111	16.1706	7.06858
MF11A-4	1034	18	10	2	1.15413	0.0657188	0.0758482	0.564478	MF11A-4-BL	18	bettong	scratch	4.5	3	1.5	1.875	5.52233	15.388	17.7598	11.0447
MF11A-4	1035	4	4	0	1.28227	0.0278616	0.0357262	0.516123	MF11A-4-BR	1	bettong	bowl	5.5	4.5	2	2.5	13.09	28.2529	36.228	19.635
MF11A-4	1035	4	4	0	1.28227	0.0278616	0.0357262	0.516123	MF11A-4-BR	2	bettong	leaning cone	3.5	3	2	1.625	5.53051	15.4019	19.7494	8.29577
MF11A-4	1035	4	4	0	1.28227	0.0278616	0.0357262	0.516123	MF11A-4-BR	3	bettong	scratch	4	3	0.5	1.75	1.60352	8.72599	11.1891	9.62113
MF11A-4	1035	4	4	0	1.28227	0.0278616	0.0357262	0.516123	MF11A-4-BR	4	bettong	bowl	4.5	3.5	2	2	8.37758	20.2419	25.9556	12.5664
MF16A-4	946	4	0	2	1.1994	0.160878	0.192958	0.547395	MF16A-4-BR	1	unknown	scratch	12	6	1	4.5	21.2058	42.0498	50.4346	63.6173
MF16A-4	946	4	0	2	1.1994	0.160878	0.192958	0.547395	MF16A-4-BR	2	unknown	nose hole	7	5	2	3	18.8496	38.0442	45.6304	28.2743
MF16A-4	946	4	0	2	1.1994	0.160878	0.192958	0.547395	MF16A-4-BR	3	rabbit	bowl	9	6	3	3.75	44.1786	81.1037	97.276	44.1786
MF16A-4	946	4	0	2	1.1994	0.160878	0.192958	0.547395	MF16A-4-BR	4	rabbit	rabbit	17	10	3	6.75	143.139	249.336	299.054	143.139
MF19A-1	957	7	2	5	1.20766	0.357013	0.431152	0.544278	MF19A-1-AL	1	rabbit	rabbit	13	6.5	2	4.875	49.7746	90.6168	109.435	74.6619
MF19A-1	957	7	2	5	1.20766	0.357013	0.431152	0.544278	MF19A-1-AL	2	rabbit	rabbit	8.5	5	3	3.375	35.7847	66.834	80.7129	35.7847
MF19A-1	957	7	2	5	1.20766	0.357013	0.431152	0.544278	MF19A-1-AL	3	bettong	nose hole	2.5	2	1.5	1.125	1.98804	9.37967	11.3275	3.97608
MF19A-1	957	7	2	5	1.20766	0.357013	0.431152	0.544278	MF19A-1-AL	4	bettong	nose hole	4.5	4	2.5	2.125	11.8219	26.0972	31.5166	14.1863
MF19A-1	957	7	2	5	1.20766	0.357013	0.431152	0.544278	MF19A-1-AL	5	rabbit	rabbit	13	7.5	4	5.125	110.021	193.036	233.122	82.5159
MF19A-1	957	7	2	5	1.20766	0.357013	0.431152	0.544278	MF19A-1-AL	6	rabbit	bowl	7	6	3	3.25	33.1831	62.4112	75.3717	33.1831
MF19A-1	957	7	2	5	1.20766	0.357013	0.431152	0.544278	MF19A-1-AL	7	rabbit	root	7	7	3.5	3.5	44.8986	82.3276	99.424	38.4845
MF19A-1	956	9	7	1	1.00292	0.169137	0.169631	0.621538	MF19A-1-AR	1	rabbit	scratch	15	8	0.5	5.75	17.3115	35.4295	35.5331	103.869
MF19A-1	956	9	7	1	1.00292	0.169137	0.169631	0.621538	MF19A-1-AR	2	bettong	nose hole	5	4.5	4	2.375	23.6274	46.1666	46.3015	17.7205
MF19A-1	956	9	7	1	1.00292	0.169137	0.169631	0.621538	MF19A-1-AR	3	bettong	nose hole	5	4.5	5	2.375	29.5342	56.2082	56.3725	17.7205
MF19A-1	956	9	7	1	1.00292	0.169137	0.169631	0.621538	MF19A-1-AR	4	bettong	nose hole	5.5	5	3.5	2.625	25.2555	48.9343	49.0773	21.6475
MF19A-1	956	9	7	1	1.00292	0.169137	0.169631	0.621538	MF19A-1-AR	5	bettong	nose hole	6	6	2.5	3	23.5619	46.0553	46.1899	28.2743
MF19A-1	956	9	7	1	1.00292	0.169137	0.169631	0.621538	MF19A-1-AR	6	bettong	nose hole	7	5	3	3	28.2743	54.0664	54.2244	28.2743
MF19A-1	956	9	7	1	1.00292	0.169137	0.169631	0.621538	MF19A-1-AR	7	unknown	scratch	24	18	3.5	10.5	404.087	692.949	694.974	346.361
MF19A-1	956	9	7	1	1.00292	0.169137	0.169631	0.621538	MF19A-1-AR	8	bettong	nose hole	4	4	2.5	2	10.472	23.8024	23.8719	12.5664
MF19A-1	956	9	7	1	1.00292	0.169137	0.169631	0.621538	MF19A-1-AR	9	bettong	scratch	3.5	3.5	1	1.75	3.20704	11.452	11.4854	9.62113
MF19A-1	958	19	10	8	0.7311	0.209522	0.153182	0.724113	MF19A-1-BL	1	rabbit	rabbit	9	6	2	3.75	29.4524	56.0691	40.9921	44.1786
MF19A-1	958	19	10	8	0.7311	0.209522	0.153182	0.724113	MF19A-1-BL	2	rabbit	rabbit	12	5.5	2	4.375	40.088	74.1497	54.2108	60.132
MF19A-1	958	19	10	8	0.7311	0.209522	0.153182	0.724113	MF19A-1-BL	3	bettong	nose hole	6.5	4	2.5	2.625	18.0396	36.6673	26.8075	21.6475
MF19A-1	958	19	10	8	0.7311	0.209522	0.153182	0.724113	MF19A-1-BL	4	bettong	nose hole	4	3	2	1.75	6.41409	16.9039	12.3585	9.62113
MF19A-1	958	19	10	8	0.7311	0.209522	0.153182	0.724113	MF19A-1-BL	5	rabbit	bowl	5	4	1.5	2.25	7.95216	19.5187	14.2701	15.9043
MF19A-1	958	19	10	8	0.7311	0.209522	0.153182	0.724113	MF19A-1-BL	6	bettong	nose hole	6	4	3.5	2.5	22.9074	44.9427	32.8576	19.635
MF19A-1	958	19	10	8	0.7311	0.209522	0.153182	0.724113	MF19A-1-BL	7	rabbit	rabbit	9	6	1.5	3.75	22.0893	43.5518	31.8407	44.1786
MF19A-1	958	19	10	8	0.7311	0.209522	0.153182	0.724113	MF19A-1-BL	8	bettong	bowl	5.5	5.5	3.5	2.75	27.718	53.1206	38.8365	23.7583
MF19A-1	958	19	10	8	0.7311	0.209522	0.153182	0.724113	MF19A-1-BL	9	bettong	nose hole	3.5	2.5	2	1.5	4.71239	14.0111	10.2435	7.06858
MF19A-1	958	19	10	8	0.7311	0.209522	0.153182	0.724113	MF19A-1-BL	10	bettong	nose hole	3.5	3	3	1.625	8.29577	20.1028	14.6972	8.29577
MF19A-1	958	19	10	8	0.7311	0.209522	0.153182	0.724113	MF19A-1-BL	11	unknown	scratch	7	4	0.5	2.75	3.95972	12.7315	9.30801	23.7583
MF19A-1	958	19	10	8	0.7311	0.209522	0.153182	0.724113	MF19A-1-BL	12	rabbit	rabbit	5	3.5	1.5	2.125	7.09313	18.0583	13.2024	14.1863
MF19A-1	958	19	10	8	0.7311	0.209522	0.153182	0.724113	MF19A-1-BL	13	rabbit	scratch	8	5	1	3.25	11.061	24.8037	18.134	33.1831
MF19A-1	958	19	10	8	0.7311	0.209522	0.153182	0.724113	MF19A-1-BL	14	bettong	nose hole	3	3	2	1.5	4.71239	14.0111	10.2435	7.06858
MF19A-1	958	19	10	8	0.7311	0.209522	0.153182	0.724113	MF19A-1-BL	15	bettong	nose hole	3.5	2.5	2.5	1.5	5.89049	16.0138	11.7077	7.06858
MF19A-1	958	19	10	8	0.7311	0.209522	0.153182	0.724113	MF19A-1-BL	16	rabbit	bowl	6.5	5	2	2.875	17.3115	35.4295	25.9025	25.9672
MF19A-1	958	19	10	8	0.7311	0.209522	0.153182	0.724113	MF19A-1-BL	17	bettong	nose hole	4	2.5	3	1.625	8.29577	20.1028	14.6972	8.29577
MF19A-1	958	19	10	8	0.7311	0.209522	0.153182	0.724113	MF19A-1-BL	18	bettong	nose hole	3	3	2	1.5	4.71239	14.0111	10.2435	7.06858
MF19A-1	958	19	10	8	0.7311	0.209522	0.153182	0.724113	MF19A-1-BL	19	rabbit	bowl	6	5	3	2.75	23.7583	46.3891	33.9151	23.7583
MF19A-1	959	23	6	2	1.00373	0.286261	0.28733	0.621232	MF19A-1-BR	1	bird	bowl	5	3.5	2	2.125	9.4575	22.0778	22.1602	14.1863
MF19A-1	959	23	6	2	1.00373	0.286261	0.28733	0.621232	MF19A-1-BR	2	bettong	nose hole	5	3.5	2	2.125	9.4575	22.0778	22.1602	14.1863
MF19A-1	959	23	6	2	1.00373	0.286261	0.28733	0.621232	MF19A-1-BR	3	rabbit	scratch	11	7	3	4.5	63.6173	114.149	114.576	63.6173
MF19A-1	959	23	6	2	1.00373	0.286261	0.28733	0.621232	MF19A-1-BR	4	bettong	bowl	5.5	5	1.5	2.625	10.8238	24.4004	24.4915	21.6475
MF19A-1	959	23	6	2	1.00373	0.286261	0.28733	0.621232	MF19A-1-BR	5	bettong	nose hole	5	6	3	2.75	23.7583	46.3891	46.5623	23.7583
MF19A-1	959	23	6	2	1.00373	0.286261	0.28733	0.621232	MF19A-1-BR	6	bettong	nose hole	6	4.5	2	2.625	14.4317	30.5339	30.6479	21.6475
MF19A-1	959	23	6	2	1.00373	0.286261	0.28733	0.621232	MF19A-1-BR	7	unknown	bowl	4.5	4	3	2.125	14.1863	30.1166	30.2291	14.1863
MF19A-1	959	23	6	2	1.00373	0.286261	0.28733	0.621232	MF19A-1-BR	8	unknown	bowl	5	6	3.5	2.75	27.718	53.1206	53.319	23.7583
MF19A-1	959	23	6	2	1.00373	0.286261	0.28733	0.621232	MF19A-1-BR	9	unknown	bowl	5	6	3.5	2.75	27.718	53.1206	53.319	23.7583
MF19A-1	959	23	6	2	1.00373	0.286261	0.28733	0.621232	MF19A-1-BR	10	unknown	bowl	5	4	2	2.25	10.6029	24.0249	24.1146	15.9043
MF19A-1	959	23	6	2	1.00373	0.286261	0.28733	0.621232	MF19A-1-BR	11	unknown	scratch	4	3	0.5	1.75	1.60352	8.72599	8.75857	9.62113
MF19A-1	959	23	6	2	1.00373	0.286261	0.28733	0.621232	MF19A-1-BR	12	bettong	nose hole	5	4	3	2.25	15.9043	33.0373	33.1607	15.9043
MF19A-1	959	23	6	2	1.00373	0.286261	0.28733	0.621232	MF19A-1-BR	13	unknown	nose hole	3	3	3	1.5	7.06858	18.0166	18.0839	7.06858
MF19A-1	959	23	6	2	1.00373	0.286261	0.28733	0.621232	MF19A-1-BR	14	unknown	nose hole	3.5	4.5	3.5	2	14.6608	30.9233	31.0388	12.5664
MF19A-1	959	23	6	2	1.00373	0.286261	0.28733	0.621232	MF19A-1-BR	15	unknown	scratch	11.5	8	2	4.875	49.7746	90.6168	90.9552	74.6619
MF19A-1	959	23	6	2	1.00373	0.286261	0.28733	0.621232	MF19A-1-BR	16	rabbit	bowl	7	6	1.5	3.25	16.5915	34.2056	34.3333	33.1831
MF19A-1	959	23	6	2	1.00373	0.286261	0.28733	0.621232	MF19A-1-BR	17	bettong	nose hole	5.5	4	3	2.375	17.7205	36.1249	36.2598	17.7205
MF19A-1	959	23	6	2	1.00373	0.286261	0.28733	0.621232	MF19A-1-BR	18	bird	nose hole	4	3.5	3	1.875	11.0447	24.7759	24.8684	11.0447
MF19A-1	959	23	6	2	1.00373	0.286261	0.28733	0.621232	MF19A-1-BR	19	unknown	nose hole	5.5	2.5	2.5	2	10.472	23.8024	23.8912	12.5664
MF19A-1	959	23	6	2	1.00373	0.286261	0.28733	0.621232	MF19A-1-BR	20	bird	bowl	5	5	3	2.5	19.635	39.3794	39.5265	19.635
MF19A-1	959	23	6	2	1.00373	0.286261	0.28733	0.621232	MF19A-1-BR	21	unknown		7.19	4.91	1.65	3.025	15.8111	32.8789	33.0017	28.7475
MF19A-1	959	23	6	2	1.00373	0.286261	0.28733	0.621232	MF19A-1-BR	22	unknown		7.19	4.91	1.65	3.025	15.8111	32.8789	33.0017	28.7475
MF19A-1	959	23	6	2	1.00373	0.286261	0.28733	0.621232	MF19A-1-BR	23	unknown		7.19	4.91	1.65	3.025	15.8111	32.8789	33.0017	28.7475
MF19A-2	966	8	3	0	0.603967	1.16075	0.701057	0.772088	MF19A-2-AL	1	unknown	bowl	6	4	1	2.5	6.54498	17.1265	10.3438	19.635
MF19A-2	966	8	3	0	0.603967	1.16075	0.701057	0.772088	MF19A-2-AL	2	unknown	bowl	4	3	1	1.75	3.20704	11.452	6.91661	9.62113
MF19A-2	966	8	3	0	0.603967	1.16075	0.701057	0.772088	MF19A-2-AL	3	unknown	scratch	7	6	2	3.25	22.122	43.6075	26.3375	33.1831
MF19A-2	966	8	3	0	0.603967	1.16075	0.701057	0.772088	MF19A-2-AL	4	unknown	bowl	12	8	4	5	104.72	184.024	111.144	78.5398
MF19A-2	966	8	3	0	0.603967	1.16075	0.701057	0.772088	MF19A-2-AL	5	bettong	nose hole	4	4	2	2	8.37758	20.2419	12.2254	12.5664
MF19A-2	966	8	3	0	0.603967	1.16075	0.701057	0.772088	MF19A-2-AL	6	bettong	nose hole	4	3	3	1.75	9.62113	22.3559	13.5022	9.62113
MF19A-2	966	8	3	0	0.603967	1.16075	0.701057	0.772088	MF19A-2-AL	7	bettong	nose hole	6	3	3	2.25	15.9043	33.0373	19.9535	15.9043
MF19A-2	966	8	3	0	0.603967	1.16075	0.701057	0.772088	MF19A-2-AL	8	unknown	rabbit	12	6	3	4.5	63.6173	114.149	68.9424	63.6173
MF19A-2	967	3	0	0	0.915853	0.352526	0.322862	0.654395	MF19A-2-AR	1	unknown	scratch	15	5	0.5	5	13.09	28.2529	25.8756	78.5398
MF19A-2	967	3	0	0	0.915853	0.352526	0.322862	0.654395	MF19A-2-AR	2	unknown	bowl	14	8	3	5.5	95.0332	167.556	153.457	95.0332
MF19A-2	967	3	0	0	0.915853	0.352526	0.322862	0.654395	MF19A-2-AR	3	unknown	scratch	28	20	1	12	150.796	262.354	240.278	452.389
MF19A-2	965	5	1	0	0.74981	0.380623	0.285395	0.717053	MF19A-2-BL	1	unknown	bowl	8	7	4	3.75	58.9049	106.138	79.5836	44.1786
MF19A-2	965	5	1	0	0.74981	0.380623	0.285395	0.717053	MF19A-2-BL	2	unknown	bowl	7	7	2	3.5	25.6563	49.6158	37.2024	38.4845
MF19A-2	965	5	1	0	0.74981	0.380623	0.285395	0.717053	MF19A-2-BL	3	unknown	bowl	7	6	5	3.25	55.3051	100.019	74.9951	33.1831
MF19A-2	965	5	1	0	0.74981	0.380623	0.285395	0.717053	MF19A-2-BL	4	unknown	bowl	9	8	1	4.25	18.915	38.1555	28.6094	56.745
MF19A-2	965	5	1	0	0.74981	0.380623	0.285395	0.717053	MF19A-2-BL	5	bettong	nose hole	5	5	2	2.5	13.09	28.2529	21.1844	19.635
MF19A-2	964	40	32	1	1.08899	0.190067	0.206982	0.58906	MF19A-2-BR	1	bettong	nose hole	3.5	3	2	1.625	5.53051	15.4019	16.7725	8.29577
MF19A-2	964	40	32	1	1.08899	0.190067	0.206982	0.58906	MF19A-2-BR	2	bettong	nose hole	4	3.5	1.5	1.875	5.52233	15.388	16.7574	11.0447
MF19A-2	964	40	32	1	1.08899	0.190067	0.206982	0.58906	MF19A-2-BR	3	bettong	nose hole	4	3	1.5	1.75	4.81056	14.178	15.4397	9.62113
MF19A-2	964	40	32	1	1.08899	0.190067	0.206982	0.58906	MF19A-2-BR	4	bettong	nose hole	4.5	4	3	2.125	14.1863	30.1166	32.7968	14.1863
MF19A-2	964	40	32	1	1.08899	0.190067	0.206982	0.58906	MF19A-2-BR	5	bettong	nose hole	4	3	2	1.75	6.41409	16.9039	18.4083	9.62113
MF19A-2	964	40	32	1	1.08899	0.190067	0.206982	0.58906	MF19A-2-BR	6	unknown	scratch	9.5	7	0.5	4.125	8.90936	21.1459	23.0277	53.4562
MF19A-2	964	40	32	1	1.08899	0.190067	0.206982	0.58906	MF19A-2-BR	7	bettong	nose hole	5	4	3	2.25	15.9043	33.0373	35.9774	15.9043
MF19A-2	964	40	32	1	1.08899	0.190067	0.206982	0.58906	MF19A-2-BR	8	bettong	nose hole	5	5	2.5	2.5	16.3625	33.8162	36.8256	19.635
MF19A-2	964	40	32	1	1.08899	0.190067	0.206982	0.58906	MF19A-2-BR	9	bettong	nose hole	4	4	2.5	2	10.472	23.8024	25.9206	12.5664
MF19A-2	964	40	32	1	1.08899	0.190067	0.206982	0.58906	MF19A-2-BR	10	rabbit	rabbit	14	9	3	5.75	103.869	182.577	198.825	103.869
MF19A-2	964	40	32	1	1.08899	0.190067	0.206982	0.58906	MF19A-2-BR	11	unknown	scratch	3.5	3	0.5	1.625	1.38263	8.35047	9.09359	8.29577
MF19A-2	964	40	32	1	1.08899	0.190067	0.206982	0.58906	MF19A-2-BR	12	bettong	nose hole	4	3	2	1.75	6.41409	16.9039	18.4083	9.62113
MF19A-2	964	40	32	1	1.08899	0.190067	0.206982	0.58906	MF19A-2-BR	13	bettong	nose hole	4	3.5	2.5	1.875	9.20388	21.6466	23.573	11.0447
MF19A-2	964	40	32	1	1.08899	0.190067	0.206982	0.58906	MF19A-2-BR	14	bettong	nose hole	5	4	3	2.25	15.9043	33.0373	35.9774	15.9043
MF19A-2	964	40	32	1	1.08899	0.190067	0.206982	0.58906	MF19A-2-BR	15	bettong	nose hole	7.5	5	3.5	3.125	35.7929	66.8479	72.7968	30.6796
MF19A-2	964	40	32	1	1.08899	0.190067	0.206982	0.58906	MF19A-2-BR	16	bettong	nose hole	4.5	4	3	2.125	14.1863	30.1166	32.7968	14.1863
MF19A-2	964	40	32	1	1.08899	0.190067	0.206982	0.58906	MF19A-2-BR	17	bettong	nose hole	5	4	3	2.25	15.9043	33.0373	35.9774	15.9043
MF19A-2	964	40	32	1	1.08899	0.190067	0.206982	0.58906	MF19A-2-BR	18	bettong	nose hole	4.5	3.5	2	2	8.37758	20.2419	22.0433	12.5664
MF19A-2	964	40	32	1	1.08899	0.190067	0.206982	0.58906	MF19A-2-BR	19	bettong	nose hole	5	4	2	2.25	10.6029	24.0249	26.1629	15.9043
MF19A-2	964	40	32	1	1.08899	0.190067	0.206982	0.58906	MF19A-2-BR	20	bettong	nose hole	5	5	4	2.5	26.1799	50.5059	55.0005	19.635
MF19A-2	964	40	32	1	1.08899	0.190067	0.206982	0.58906	MF19A-2-BR	21	unknown		7.19	4.91	1.65	3.025	15.8111	32.8789	35.8049	28.7475
MF19A-2	964	40	32	1	1.08899	0.190067	0.206982	0.58906	MF19A-2-BR	22	unknown		7.19	4.91	1.65	3.025	15.8111	32.8789	35.8049	28.7475
MF19A-2	964	40	32	1	1.08899	0.190067	0.206982	0.58906	MF19A-2-BR	23	unknown		7.19	4.91	1.65	3.025	15.8111	32.8789	35.8049	28.7475
MF19A-2	964	40	32	1	1.08899	0.190067	0.206982	0.58906	MF19A-2-BR	24	unknown		7.19	4.91	1.65	3.025	15.8111	32.8789	35.8049	28.7475
MF19A-2	964	40	32	1	1.08899	0.190067	0.206982	0.58906	MF19A-2-BR	25	unknown		7.19	4.91	1.65	3.025	15.8111	32.8789	35.8049	28.7475
MF19A-2	964	40	32	1	1.08899	0.190067	0.206982	0.58906	MF19A-2-BR	26	bettong		4.91	3.86	3.12	2.1925	15.7059	32.7	35.61	15.1018
MF19A-2	964	40	32	1	1.08899	0.190067	0.206982	0.58906	MF19A-2-BR	27	bettong		4.91	3.86	3.12	2.1925	15.7059	32.7	35.61	15.1018
MF19A-2	964	40	32	1	1.08899	0.190067	0.206982	0.58906	MF19A-2-BR	28	bettong		4.91	3.86	3.12	2.1925	15.7059	32.7	35.61	15.1018
MF19A-2	964	40	32	1	1.08899	0.190067	0.206982	0.58906	MF19A-2-BR	29	bettong		4.91	3.86	3.12	2.1925	15.7059	32.7	35.61	15.1018
MF19A-2	964	40	32	1	1.08899	0.190067	0.206982	0.58906	MF19A-2-BR	30	bettong		4.91	3.86	3.12	2.1925	15.7059	32.7	35.61	15.1018
MF19A-2	964	40	32	1	1.08899	0.190067	0.206982	0.58906	MF19A-2-BR	31	bettong		4.91	3.86	3.12	2.1925	15.7059	32.7	35.61	15.1018
MF19A-2	964	40	32	1	1.08899	0.190067	0.206982	0.58906	MF19A-2-BR	32	bettong		4.91	3.86	3.12	2.1925	15.7059	32.7	35.61	15.1018
MF19A-2	964	40	32	1	1.08899	0.190067	0.206982	0.58906	MF19A-2-BR	33	bettong		4.91	3.86	3.12	2.1925	15.7059	32.7	35.61	15.1018
MF19A-2	964	40	32	1	1.08899	0.190067	0.206982	0.58906	MF19A-2-BR	34	bettong		4.91	3.86	3.12	2.1925	15.7059	32.7	35.61	15.1018
MF19A-2	964	40	32	1	1.08899	0.190067	0.206982	0.58906	MF19A-2-BR	35	bettong		4.91	3.86	3.12	2.1925	15.7059	32.7	35.61	15.1018
MF19A-2	964	40	32	1	1.08899	0.190067	0.206982	0.58906	MF19A-2-BR	36	bettong		4.91	3.86	3.12	2.1925	15.7059	32.7	35.61	15.1018
MF19A-2	964	40	32	1	1.08899	0.190067	0.206982	0.58906	MF19A-2-BR	37	bettong		4.91	3.86	3.12	2.1925	15.7059	32.7	35.61	15.1018
MF19A-2	964	40	32	1	1.08899	0.190067	0.206982	0.58906	MF19A-2-BR	38	bettong		4.91	3.86	3.12	2.1925	15.7059	32.7	35.61	15.1018
MF19A-2	964	40	32	1	1.08899	0.190067	0.206982	0.58906	MF19A-2-BR	39	bettong		4.91	3.86	3.12	2.1925	15.7059	32.7	35.61	15.1018
MF19A-2	964	40	32	1	1.08899	0.190067	0.206982	0.58906	MF19A-2-BR	40	bettong		4.91	3.86	3.12	2.1925	15.7059	32.7	35.61	15.1018
MF19A-3	864	5	0	0	1.10907	0.469625	0.520846	0.581484	MF19A-3-AR	1	unknown	scratch	5	2.5	0.5	1.875	1.84078	9.12932	10.125	11.0447
MF19A-3	864	5	0	0	1.10907	0.469625	0.520846	0.581484	MF19A-3-AR	2	unknown	scratch	3	1.5	0.5	1.125	0.66268	7.12656	7.90382	3.97608
MF19A-3	864	5	0	0	1.10907	0.469625	0.520846	0.581484	MF19A-3-AR	3	unknown	scratch	4	3.5	0.5	1.875	1.84078	9.12932	10.125	11.0447
MF19A-3	864	5	0	0	1.10907	0.469625	0.520846	0.581484	MF19A-3-AR	4	unknown	leaning cone	4	3.5	1.5	1.875	5.52233	15.388	17.0663	11.0447
MF19A-3	864	5	0	0	1.10907	0.469625	0.520846	0.581484	MF19A-3-AR	5	unknown	nose hole	2.5	2	1	1.125	1.32536	8.25311	9.15324	3.97608
MF19A-3	866	4	0	1	1.07607	0.149851	0.161251	0.593934	MF19A-3-BL	1	unknown	scratch	4.5	2.5	0.5	1.75	1.60352	8.72599	9.38982	9.62113
MF19A-3	866	4	0	1	1.07607	0.149851	0.161251	0.593934	MF19A-3-BL	2	unknown	scratch	3	3	0.5	1.5	1.1781	8.00277	8.61158	7.06858
MF19A-3	866	4	0	1	1.07607	0.149851	0.161251	0.593934	MF19A-3-BL	3	rabbit	leaning cone	9	9	2.5	4.5	53.0144	96.1244	103.437	63.6173
MF19A-3	866	4	0	1	1.07607	0.149851	0.161251	0.593934	MF19A-3-BL	4	unknown	bowl	6	4.5	1.5	2.625	10.8238	24.4004	26.2567	21.6475
MF19A-3	867	6	0	0	0.392143	2.35085	0.921871	0.852021	MF19A-3-BR	1	unknown	scratch	5	3	1	2	4.18879	13.1209	5.14529	12.5664
MF19A-3	867	6	0	0	0.392143	2.35085	0.921871	0.852021	MF19A-3-BR	2	unknown	scratch	6	4.5	0.5	2.625	3.60792	12.1335	4.75806	21.6475
MF19A-3	867	6	0	0	0.392143	2.35085	0.921871	0.852021	MF19A-3-BR	3	unknown	nose hole	4	3	3.5	1.75	11.2246	25.0819	9.8357	9.62113
MF19A-3	867	6	0	0	0.392143	2.35085	0.921871	0.852021	MF19A-3-BR	4	unknown	scratch	5	4	0.5	2.25	2.65072	10.5062	4.11995	15.9043
MF19A-3	867	6	0	0	0.392143	2.35085	0.921871	0.852021	MF19A-3-BR	5	unknown	scratch	8	5	0.5	3.25	5.53051	15.4019	6.03974	33.1831
MF19A-3	867	6	0	0	0.392143	2.35085	0.921871	0.852021	MF19A-3-BR	6	unknown	nose hole	4	3	2	1.75	6.41409	16.9039	6.62877	9.62113
MF19A-4	807	9	0	0	1.09942	0.21542	0.236837	0.585125	MF19A-4-AL	1	unknown	scratch	10	5	0.5	3.75	7.36311	18.5173	20.3583	44.1786
MF19A-4	807	9	0	0	1.09942	0.21542	0.236837	0.585125	MF19A-4-AL	2	unknown	nose hole	2.5	2.5	2	1.25	3.27249	11.5632	12.7128	4.90874
MF19A-4	807	9	0	0	1.09942	0.21542	0.236837	0.585125	MF19A-4-AL	3	unknown	scratch	7	5	2	3	18.8496	38.0442	41.8266	28.2743
MF19A-4	807	9	0	0	1.09942	0.21542	0.236837	0.585125	MF19A-4-AL	4	unknown	scratch	9	6	0.5	3.75	7.36311	18.5173	20.3583	44.1786
MF19A-4	807	9	0	0	1.09942	0.21542	0.236837	0.585125	MF19A-4-AL	5	unknown	scratch	7	4	0.5	2.75	3.95972	12.7315	13.9973	23.7583
MF19A-4	807	9	0	0	1.09942	0.21542	0.236837	0.585125	MF19A-4-AL	6	unknown	nose hole	4	3	2.5	1.75	8.01761	19.6299	21.5815	9.62113
MF19A-4	807	9	0	0	1.09942	0.21542	0.236837	0.585125	MF19A-4-AL	7	unknown	cone	4	3.5	1	1.875	3.68155	12.2586	13.4774	11.0447
MF19A-4	807	9	0	0	1.09942	0.21542	0.236837	0.585125	MF19A-4-AL	8	unknown	scratch	12	12	0.5	6	18.8496	38.0442	41.8266	113.097
MF19A-4	807	9	0	0	1.09942	0.21542	0.236837	0.585125	MF19A-4-AL	9	unknown	scratch	8	4	1	3	9.42478	22.0221	24.2115	28.2743
MF19A-4	806	20	0	9	0.900833	0.332134	0.299198	0.660063	MF19A-4-AR	1	bird	scratch	12	5.5	1	4.375	20.044	40.0748	36.1007	60.132
MF19A-4	806	20	0	9	0.900833	0.332134	0.299198	0.660063	MF19A-4-AR	2	rabbit	scratch	12	11	1	5.75	34.623	64.859	58.4272	103.869
MF19A-4	806	20	0	9	0.900833	0.332134	0.299198	0.660063	MF19A-4-AR	3	unknown	leaning cone	6	3.5	2	2.375	11.8137	26.0833	23.4967	17.7205
MF19A-4	806	20	0	9	0.900833	0.332134	0.299198	0.660063	MF19A-4-AR	4	unknown	scratch	12	8	1	5	26.1799	50.5059	45.4974	78.5398
MF19A-4	806	20	0	9	0.900833	0.332134	0.299198	0.660063	MF19A-4-AR	5	unknown	scratch	10	9	1	4.75	23.6274	46.1666	41.5884	70.8822
MF19A-4	806	20	0	9	0.900833	0.332134	0.299198	0.660063	MF19A-4-AR	6	unknown	nose hole	2	2	2	1	2.0944	9.56047	8.61239	3.14159
MF19A-4	806	20	0	9	0.900833	0.332134	0.299198	0.660063	MF19A-4-AR	7	unknown	scratch	10	7	1	4.25	18.915	38.1555	34.3717	56.745
MF19A-4	806	20	0	9	0.900833	0.332134	0.299198	0.660063	MF19A-4-AR	8	rabbit	rabbit	7	5	4	3	37.6991	70.0885	63.138	28.2743
MF19A-4	806	20	0	9	0.900833	0.332134	0.299198	0.660063	MF19A-4-AR	9	rabbit	rabbit	9	5	3	3.5	38.4845	71.4237	64.3408	38.4845
MF19A-4	806	20	0	9	0.900833	0.332134	0.299198	0.660063	MF19A-4-AR	10	unknown	scratch	5	3	1	2	4.18879	13.1209	11.8198	12.5664
MF19A-4	806	20	0	9	0.900833	0.332134	0.299198	0.660063	MF19A-4-AR	11	unknown	scratch	9	6	3.5	3.75	51.5418	93.621	84.3369	44.1786
MF19A-4	806	20	0	9	0.900833	0.332134	0.299198	0.660063	MF19A-4-AR	12	rabbit	scratch	8	6	1	3.5	12.8282	27.8079	25.0503	38.4845
MF19A-4	806	20	0	9	0.900833	0.332134	0.299198	0.660063	MF19A-4-AR	13	rabbit	rabbit	13	5	2	4.5	42.4115	78.0996	70.3546	63.6173
MF19A-4	806	20	0	9	0.900833	0.332134	0.299198	0.660063	MF19A-4-AR	14	unknown	cone	10	6	3	4	50.2655	91.4513	82.3824	50.2655
MF19A-4	806	20	0	9	0.900833	0.332134	0.299198	0.660063	MF19A-4-AR	15	unknown	scratch	9	3.5	1	3.125	10.2265	23.3851	21.0661	30.6796
MF19A-4	806	20	0	9	0.900833	0.332134	0.299198	0.660063	MF19A-4-AR	16	rabbit	scratch	9	6	2	3.75	29.4524	56.0691	50.5089	44.1786
MF19A-4	806	20	0	9	0.900833	0.332134	0.299198	0.660063	MF19A-4-AR	17	rabbit	scratch	13	6	2	4.75	47.2548	86.3331	77.7717	70.8822
MF19A-4	806	20	0	9	0.900833	0.332134	0.299198	0.660063	MF19A-4-AR	18	rabbit	rabbit	10	7	5	4.25	94.575	166.778	150.239	56.745
MF19A-4	806	20	0	9	0.900833	0.332134	0.299198	0.660063	MF19A-4-AR	19	rabbit	scratch	3	3	1	1.5	2.35619	10.0055	9.01331	7.06858
MF19A-4	806	20	0	9	0.900833	0.332134	0.299198	0.660063	MF19A-4-AR	20	unknown	leaning cone	5	3.5	3	2.125	14.1863	30.1166	27.1301	14.1863
MF19A-4	804	30	1	0	1.24575	0.220364	0.27452	0.529904	MF19A-4-BL	3	bird	nose hole	3	3	3	1.5	7.06858	18.0166	22.4443	7.06858
MF19A-4	804	30	1	0	1.24575	0.220364	0.27452	0.529904	MF19A-4-BL	4	bird	leaning cone	5	4.5	3	2.375	17.7205	36.1249	45.0028	17.7205
MF19A-4	804	30	1	0	1.24575	0.220364	0.27452	0.529904	MF19A-4-BL	5	bird	nose hole	8	4	5	3	47.1239	86.1106	107.273	28.2743
MF19A-4	804	30	1	0	1.24575	0.220364	0.27452	0.529904	MF19A-4-BL	6	bird	nose hole	3	4	5	1.75	16.0352	33.2599	41.4336	9.62113
MF19A-4	804	30	1	0	1.24575	0.220364	0.27452	0.529904	MF19A-4-BL	7	bird	scratch	3	3	1	1.5	2.35619	10.0055	12.4644	7.06858
MF19A-4	804	30	1	0	1.24575	0.220364	0.27452	0.529904	MF19A-4-BL	8	bird	scratch	17	13	0.5	7.5	29.4524	56.0691	69.8484	176.715
MF19A-4	804	30	1	0	1.24575	0.220364	0.27452	0.529904	MF19A-4-BL	9	bird	nose hole	4	4	3	2	12.5664	27.3628	34.0874	12.5664
MF19A-4	804	30	1	0	1.24575	0.220364	0.27452	0.529904	MF19A-4-BL	10	bird	nose hole	6	6	4	3	37.6991	70.0885	87.3131	28.2743
MF19A-4	804	30	1	0	1.24575	0.220364	0.27452	0.529904	MF19A-4-BL	11	bird	rabbit	6	4	2	2.5	13.09	28.2529	35.1963	19.635
MF19A-4	804	30	1	0	1.24575	0.220364	0.27452	0.529904	MF19A-4-BL	12	bird	scratch	6.5	3	0.5	2.375	2.95342	11.0208	13.7292	17.7205
MF19A-4	804	30	1	0	1.24575	0.220364	0.27452	0.529904	MF19A-4-BL	13	bird	scratch	4	4	1	2	4.18879	13.1209	16.3455	12.5664
MF19A-4	804	30	1	0	1.24575	0.220364	0.27452	0.529904	MF19A-4-BL	14	bettong	bowl	5.5	4.5	4	2.5	26.1799	50.5059	62.918	19.635
MF19A-4	804	30	1	0	1.24575	0.220364	0.27452	0.529904	MF19A-4-BL	15	bird	nose hole	3.5	2.5	1.5	1.5	3.53429	12.0083	14.9594	7.06858
MF19A-4	804	30	1	0	1.24575	0.220364	0.27452	0.529904	MF19A-4-BL	16	bird	root	6	5	2	2.75	15.8389	32.9261	41.0178	23.7583
MF19A-4	804	30	1	0	1.24575	0.220364	0.27452	0.529904	MF19A-4-BL	17	bird	scratch	8	5	0.5	3.25	5.53051	15.4019	19.187	33.1831
MF19A-4	804	30	1	0	1.24575	0.220364	0.27452	0.529904	MF19A-4-BL	18	bird	scratch	9	5	0.5	3.5	6.41409	16.9039	21.0582	38.4845
MF19A-4	804	30	1	0	1.24575	0.220364	0.27452	0.529904	MF19A-4-BL	19	bird	scratch	3.5	3	1	1.625	2.76526	10.7009	13.3307	8.29577
MF19A-4	804	30	1	0	1.24575	0.220364	0.27452	0.529904	MF19A-4-BL	20	bird	scratch	4	2	0.5	1.5	1.1781	8.00277	9.96948	7.06858
MF19A-4	804	30	1	0	1.24575	0.220364	0.27452	0.529904	MF19A-4-BL	21	wallaby	bowl	2.5	2	1	1.125	1.32536	8.25311	10.2814	3.97608
MF19A-4	804	30	1	0	1.24575	0.220364	0.27452	0.529904	MF19A-4-BL	22	bird	scratch	3	2	0.5	1.25	0.818123	7.39081	9.20714	4.90874
MF19A-4	804	30	1	0	1.24575	0.220364	0.27452	0.529904	MF19A-4-BL	23	bird	scratch	5	4	0.5	2.25	2.65072	10.5062	13.0882	15.9043
MF19A-4	804	30	1	0	1.24575	0.220364	0.27452	0.529904	MF19A-4-BL	24	bird	root	3	2	1.5	1.25	2.45437	10.1724	12.6724	4.90874
MF19A-4	804	30	1	0	1.24575	0.220364	0.27452	0.529904	MF19A-4-BL	25	bird	scratch	4	2	1	1.5	2.35619	10.0055	12.4644	7.06858
MF19A-4	804	30	1	0	1.24575	0.220364	0.27452	0.529904	MF19A-4-BL	26	bird	scratch	5	3	0.5	2	2.0944	9.56047	11.91	12.5664
MF19A-4	804	30	1	0	1.24575	0.220364	0.27452	0.529904	MF19A-4-BL	27	bird	scratch	6	3	2	2.25	10.6029	24.0249	29.9291	15.9043
MF19A-4	804	30	1	0	1.24575	0.220364	0.27452	0.529904	MF19A-4-BL	28	bird	rabbit	6	5	2	2.75	15.8389	32.9261	41.0178	23.7583
MF19A-4	804	30	1	0	1.24575	0.220364	0.27452	0.529904	MF19A-4-BL	29	bird	scratch	8	4	1	3	9.42478	22.0221	27.4342	28.2743
MF19A-4	804	30	1	0	1.24575	0.220364	0.27452	0.529904	MF19A-4-BL	30	bird	bowl	3	3	2	1.5	4.71239	14.0111	17.4543	7.06858
MF19A-4	804	30	1	0	1.24575	0.220364	0.27452	0.529904	MF19A-4-BL	1	bird	scratch	15	10	0.5	6.25	20.4531	40.7702	50.7897	122.718
MF19A-4	804	30	1	0	1.24575	0.220364	0.27452	0.529904	MF19A-4-BL	2	bird	nose hole	3	3	4.5	1.5	10.6029	24.0249	29.9291	7.06858
MF19A-4	805	3	0	0	1.07607	0.340631	0.366542	0.593937	MF19A-4-BR	1	unknown	bowl	3.5	3.5	2	1.75	6.41409	16.9039	18.1898	9.62113
MF19A-4	805	3	0	0	1.07607	0.340631	0.366542	0.593937	MF19A-4-BR	2	unknown	bowl	3	2	1	1.25	1.63625	8.78162	9.44961	4.90874
MF19A-4	805	3	0	0	1.07607	0.340631	0.366542	0.593937	MF19A-4-BR	3	unknown	leaning cone	5	3.5	1.5	2.125	7.09313	18.0583	19.432	14.1863
MF22A-1	1005	8	8	0	1.22925	0.272796	0.335333	0.536133	MF22A-1-AL	1	bettong	nose hole	5	3.5	3.5	2.125	16.5506	34.1361	41.9616	14.1863
MF22A-1	1005	8	8	0	1.22925	0.272796	0.335333	0.536133	MF22A-1-AL	2	bettong	nose hole	8.5	6	3.5	3.625	48.1629	87.8769	108.022	41.2825
MF22A-1	1005	8	8	0	1.22925	0.272796	0.335333	0.536133	MF22A-1-AL	3	bettong	scratch	12	10	1	5.5	31.6777	59.8521	73.573	95.0332
MF22A-1	1005	8	8	0	1.22925	0.272796	0.335333	0.536133	MF22A-1-AL	4	bettong	nose hole	5.5	5	4	2.625	28.8634	55.0678	67.6918	21.6475
MF22A-1	1005	8	8	0	1.22925	0.272796	0.335333	0.536133	MF22A-1-AL	5	bettong	nose hole	5.5	5	4	2.625	28.8634	55.0678	67.6918	21.6475
MF22A-1	1005	8	8	0	1.22925	0.272796	0.335333	0.536133	MF22A-1-AL	6	bettong	nose hole	4.5	3.5	1.5	2	6.28319	16.6814	20.5056	12.5664
MF22A-1	1005	8	8	0	1.22925	0.272796	0.335333	0.536133	MF22A-1-AL	7	bettong	nose hole	4.5	3	1.5	1.875	5.52233	15.388	18.9156	11.0447
MF22A-1	1005	8	8	0	1.22925	0.272796	0.335333	0.536133	MF22A-1-AL	8	bettong	nose hole	8.5	8.5	3	4.25	56.745	102.467	125.957	56.745
MF22A-1	1004	12	10	0	1.18496	0.20353	0.241175	0.552845	MF22A-1-AR	1	bettong	nose hole	5.5	5	3	2.625	21.6475	42.8008	50.7173	21.6475
MF22A-1	1004	12	10	0	1.18496	0.20353	0.241175	0.552845	MF22A-1-AR	2	bettong	nose hole	5.5	4.5	3.5	2.5	22.9074	44.9427	53.2553	19.635
MF22A-1	1004	12	10	0	1.18496	0.20353	0.241175	0.552845	MF22A-1-AR	3	bettong	nose hole	6	5	4.5	2.75	35.6374	66.5837	78.899	23.7583
MF22A-1	1004	12	10	0	1.18496	0.20353	0.241175	0.552845	MF22A-1-AR	4	bettong	nose hole	8	5	3.5	3.25	38.7136	71.8131	85.0957	33.1831
MF22A-1	1004	12	10	0	1.18496	0.20353	0.241175	0.552845	MF22A-1-AR	5	bettong	bowl	5	4	2.5	2.25	13.2536	28.5311	33.8083	15.9043
MF22A-1	1004	12	10	0	1.18496	0.20353	0.241175	0.552845	MF22A-1-AR	6	bettong	bowl	7	6.5	4	3.375	47.7129	87.112	103.224	35.7847
MF22A-1	1004	12	10	0	1.18496	0.20353	0.241175	0.552845	MF22A-1-AR	7	bettong	bowl	6	9	4	3.75	58.9049	106.138	125.77	44.1786
MF22A-1	1004	12	10	0	1.18496	0.20353	0.241175	0.552845	MF22A-1-AR	8	unknown	scratch	4	5	0.5	2.25	2.65072	10.5062	12.4495	15.9043
MF22A-1	1004	12	10	0	1.18496	0.20353	0.241175	0.552845	MF22A-1-AR	9	unknown	scratch	6	8	0.5	3.5	6.41409	16.9039	20.0305	38.4845
MF22A-1	1004	12	10	0	1.18496	0.20353	0.241175	0.552845	MF22A-1-AR	10	bettong	nose hole	6	4	3	2.5	19.635	39.3794	46.6631	19.635
MF22A-1	1004	12	10	0	1.18496	0.20353	0.241175	0.552845	MF22A-1-AR	11	bettong	scratch	5	5	2	2.5	13.09	28.2529	33.4786	19.635
MF22A-1	1004	12	10	0	1.18496	0.20353	0.241175	0.552845	MF22A-1-AR	12	bettong	nose hole	7	8	2	3.75	29.4524	56.0691	66.4397	44.1786
MF22A-1	1006	4	3	0	1.31159	0.129885	0.170356	0.505061	MF22A-1-BL	1	unknown	bowl	4.5	4.5	1.5	2.25	7.95216	19.5187	25.6005	15.9043
MF22A-1	1006	4	3	0	1.31159	0.129885	0.170356	0.505061	MF22A-1-BL	2	bettong	nose hole	6.5	5	3	2.875	25.9672	50.1443	65.7687	25.9672
MF22A-1	1006	4	3	0	1.31159	0.129885	0.170356	0.505061	MF22A-1-BL	3	bettong	nose hole	4.5	4	3.5	2.125	16.5506	34.1361	44.7725	14.1863
MF22A-1	1006	4	3	0	1.31159	0.129885	0.170356	0.505061	MF22A-1-BL	4	bettong	nose hole	4	4	4	2	16.7552	34.4838	45.2285	12.5664
MF22A-1	1007	3	1	0	1.12432	0.274727	0.308882	0.575727	MF22A-1-BR	1	bettong	nose hole	4.5	4	3	2.125	14.1863	30.1166	33.8608	14.1863
MF22A-1	1007	3	1	0	1.12432	0.274727	0.308882	0.575727	MF22A-1-BR	2	unknown	bowl	2.5	2.5	2	1.25	3.27249	11.5632	13.0008	4.90874
MF22A-1	1007	3	1	0	1.12432	0.274727	0.308882	0.575727	MF22A-1-BR	3	unknown	scratch	12	6	1	4.5	21.2058	42.0498	47.2775	63.6173
MF22A-2	1040	38	35	0	1.15821	0.152688	0.176845	0.562938	MF22A-2-AL	1	bettong	nose hole	6	4	3	2.5	19.635	39.3794	45.6098	19.635
MF22A-2	1040	38	35	0	1.15821	0.152688	0.176845	0.562938	MF22A-2-AL	2	bettong	nose hole	3	3	3	1.5	7.06858	18.0166	20.8671	7.06858
MF22A-2	1040	38	35	0	1.15821	0.152688	0.176845	0.562938	MF22A-2-AL	3	bettong	leaning cone	4	3	3	1.75	9.62113	22.3559	25.8929	9.62113
MF22A-2	1040	38	35	0	1.15821	0.152688	0.176845	0.562938	MF22A-2-AL	4	bettong	nose hole	8	4	3	3	28.2743	54.0664	62.6204	28.2743
MF22A-2	1040	38	35	0	1.15821	0.152688	0.176845	0.562938	MF22A-2-AL	5	unknown	scratch	8	6	0	3.5	0	6	6.94928	38.4845
MF22A-2	1040	38	35	0	1.15821	0.152688	0.176845	0.562938	MF22A-2-AL	6	bettong	nose hole	5	3	3	2	12.5664	27.3628	31.692	12.5664
MF22A-2	1040	38	35	0	1.15821	0.152688	0.176845	0.562938	MF22A-2-AL	7	bettong	nose hole	4	3	3	1.75	9.62113	22.3559	25.8929	9.62113
MF22A-2	1040	38	35	0	1.15821	0.152688	0.176845	0.562938	MF22A-2-AL	8	bettong	nose hole	5	5	3	2.5	19.635	39.3794	45.6098	19.635
MF22A-2	1040	38	35	0	1.15821	0.152688	0.176845	0.562938	MF22A-2-AL	9	bettong	bowl	5	4	1	2.25	5.30144	15.0124	17.3876	15.9043
MF22A-2	1040	38	35	0	1.15821	0.152688	0.176845	0.562938	MF22A-2-AL	10	bettong	nose hole	5	4	3	2.25	15.9043	33.0373	38.2643	15.9043
MF22A-2	1040	38	35	0	1.15821	0.152688	0.176845	0.562938	MF22A-2-AL	11	bettong	nose hole	4	4	3	2	12.5664	27.3628	31.692	12.5664
MF22A-2	1040	38	35	0	1.15821	0.152688	0.176845	0.562938	MF22A-2-AL	12	unknown	gouge	4	2	3	1.5	7.06858	18.0166	20.8671	7.06858
MF22A-2	1040	38	35	0	1.15821	0.152688	0.176845	0.562938	MF22A-2-AL	13	unknown	scratch	6	3	0.5	2.25	2.65072	10.5062	12.1684	15.9043
MF22A-2	1040	38	35	0	1.15821	0.152688	0.176845	0.562938	MF22A-2-AL	14	bettong	nose hole	4	3	2	1.75	6.41409	16.9039	19.5784	9.62113
MF22A-2	1040	38	35	0	1.15821	0.152688	0.176845	0.562938	MF22A-2-AL	15	bettong	nose hole	6	5	3	2.75	23.7583	46.3891	53.7285	23.7583
MF22A-2	1040	38	35	0	1.15821	0.152688	0.176845	0.562938	MF22A-2-AL	16	bettong	nose hole	3	2	3	1.25	4.90874	14.3449	16.6144	4.90874
MF22A-2	1040	38	35	0	1.15821	0.152688	0.176845	0.562938	MF22A-2-AL	17	bettong	nose hole	4	2	2	1.5	4.71239	14.0111	16.2278	7.06858
MF22A-2	1040	38	35	0	1.15821	0.152688	0.176845	0.562938	MF22A-2-AL	18	bettong	nose hole	4	4	2	2	8.37758	20.2419	23.4444	12.5664
MF22A-2	1040	38	35	0	1.15821	0.152688	0.176845	0.562938	MF22A-2-AL	19	bettong	nose hole	5	5	3	2.5	19.635	39.3794	45.6098	19.635
MF22A-2	1040	38	35	0	1.15821	0.152688	0.176845	0.562938	MF22A-2-AL	20	bettong	nose hole	6	4	5	2.5	32.7249	61.6324	71.3834	19.635
MF22A-2	1040	38	35	0	1.15821	0.152688	0.176845	0.562938	MF22A-2-AL	21	bettong		4.91	3.86	3.12	2.1925	15.7059	32.7	37.8736	15.1018
MF22A-2	1040	38	35	0	1.15821	0.152688	0.176845	0.562938	MF22A-2-AL	22	bettong		4.91	3.86	3.12	2.1925	15.7059	32.7	37.8736	15.1018
MF22A-2	1040	38	35	0	1.15821	0.152688	0.176845	0.562938	MF22A-2-AL	23	bettong		4.91	3.86	3.12	2.1925	15.7059	32.7	37.8736	15.1018
MF22A-2	1040	38	35	0	1.15821	0.152688	0.176845	0.562938	MF22A-2-AL	24	bettong		4.91	3.86	3.12	2.1925	15.7059	32.7	37.8736	15.1018
MF22A-2	1040	38	35	0	1.15821	0.152688	0.176845	0.562938	MF22A-2-AL	25	bettong		4.91	3.86	3.12	2.1925	15.7059	32.7	37.8736	15.1018
MF22A-2	1040	38	35	0	1.15821	0.152688	0.176845	0.562938	MF22A-2-AL	26	bettong		4.91	3.86	3.12	2.1925	15.7059	32.7	37.8736	15.1018
MF22A-2	1040	38	35	0	1.15821	0.152688	0.176845	0.562938	MF22A-2-AL	27	bettong		4.91	3.86	3.12	2.1925	15.7059	32.7	37.8736	15.1018
MF22A-2	1040	38	35	0	1.15821	0.152688	0.176845	0.562938	MF22A-2-AL	28	bettong		4.91	3.86	3.12	2.1925	15.7059	32.7	37.8736	15.1018
MF22A-2	1040	38	35	0	1.15821	0.152688	0.176845	0.562938	MF22A-2-AL	29	bettong		4.91	3.86	3.12	2.1925	15.7059	32.7	37.8736	15.1018
MF22A-2	1040	38	35	0	1.15821	0.152688	0.176845	0.562938	MF22A-2-AL	30	bettong		4.91	3.86	3.12	2.1925	15.7059	32.7	37.8736	15.1018
MF22A-2	1040	38	35	0	1.15821	0.152688	0.176845	0.562938	MF22A-2-AL	31	bettong		4.91	3.86	3.12	2.1925	15.7059	32.7	37.8736	15.1018
MF22A-2	1040	38	35	0	1.15821	0.152688	0.176845	0.562938	MF22A-2-AL	32	bettong		4.91	3.86	3.12	2.1925	15.7059	32.7	37.8736	15.1018
MF22A-2	1040	38	35	0	1.15821	0.152688	0.176845	0.562938	MF22A-2-AL	33	bettong		4.91	3.86	3.12	2.1925	15.7059	32.7	37.8736	15.1018
MF22A-2	1040	38	35	0	1.15821	0.152688	0.176845	0.562938	MF22A-2-AL	34	bettong		4.91	3.86	3.12	2.1925	15.7059	32.7	37.8736	15.1018
MF22A-2	1040	38	35	0	1.15821	0.152688	0.176845	0.562938	MF22A-2-AL	35	bettong		4.91	3.86	3.12	2.1925	15.7059	32.7	37.8736	15.1018
MF22A-2	1040	38	35	0	1.15821	0.152688	0.176845	0.562938	MF22A-2-AL	36	bettong		4.91	3.86	3.12	2.1925	15.7059	32.7	37.8736	15.1018
MF22A-2	1040	38	35	0	1.15821	0.152688	0.176845	0.562938	MF22A-2-AL	37	bettong		4.91	3.86	3.12	2.1925	15.7059	32.7	37.8736	15.1018
MF22A-2	1040	38	35	0	1.15821	0.152688	0.176845	0.562938	MF22A-2-AL	38	bettong		4.91	3.86	3.12	2.1925	15.7059	32.7	37.8736	15.1018
MF22A-2	1041	35	11	21	1.40296	0.0347662	0.0487758	0.47058	MF22A-2-AR	1	rabbit	bowl	9	6	3	3.75	44.1786	81.1037	113.785	44.1786
MF22A-2	1041	35	11	21	1.40296	0.0347662	0.0487758	0.47058	MF22A-2-AR	2	bettong	nose hole	5	4	1.5	2.25	7.95216	19.5187	27.384	15.9043
MF22A-2	1041	35	11	21	1.40296	0.0347662	0.0487758	0.47058	MF22A-2-AR	3	rabbit	bowl	14	7	2	5.25	57.7268	104.136	146.098	86.5901
MF22A-2	1041	35	11	21	1.40296	0.0347662	0.0487758	0.47058	MF22A-2-AR	4	rabbit	bowl	13	5	0.5	4.5	10.6029	24.0249	33.706	63.6173
MF22A-2	1041	35	11	21	1.40296	0.0347662	0.0487758	0.47058	MF22A-2-AR	5	rabbit	rabbit	11	5	1	4	16.7552	34.4838	48.3795	50.2655
MF22A-2	1041	35	11	21	1.40296	0.0347662	0.0487758	0.47058	MF22A-2-AR	6	unknown	scratch	9	9	1	4.5	21.2058	42.0498	58.9943	63.6173
MF22A-2	1041	35	11	21	1.40296	0.0347662	0.0487758	0.47058	MF22A-2-AR	7	rabbit	scratch	14	8	1	5.5	31.6777	59.8521	83.9703	95.0332
MF22A-2	1041	35	11	21	1.40296	0.0347662	0.0487758	0.47058	MF22A-2-AR	8	echidna	scratch	33	13	3	11.5	415.476	712.309	999.343	415.476
MF22A-2	1041	35	11	21	1.40296	0.0347662	0.0487758	0.47058	MF22A-2-AR	9	rabbit	bowl	11	10	3	5.25	86.5901	153.203	214.938	86.5901
MF22A-2	1041	35	11	21	1.40296	0.0347662	0.0487758	0.47058	MF22A-2-AR	10	rabbit	bowl	10	8	2	4.5	42.4115	78.0996	109.571	63.6173
MF22A-2	1041	35	11	21	1.40296	0.0347662	0.0487758	0.47058	MF22A-2-AR	11	rabbit	bowl	11	9	2	5	52.3599	95.0118	133.298	78.5398
MF22A-2	1041	35	11	21	1.40296	0.0347662	0.0487758	0.47058	MF22A-2-AR	12	rabbit	bowl	10	8	1	4.5	21.2058	42.0498	58.9943	63.6173
MF22A-2	1041	35	11	21	1.40296	0.0347662	0.0487758	0.47058	MF22A-2-AR	13	bettong	nose hole	5	4	3	2.25	15.9043	33.0373	46.3502	15.9043
MF22A-2	1041	35	11	21	1.40296	0.0347662	0.0487758	0.47058	MF22A-2-AR	14	bettong	nose hole	5	5	4	2.5	26.1799	50.5059	70.8579	19.635
MF22A-2	1041	35	11	21	1.40296	0.0347662	0.0487758	0.47058	MF22A-2-AR	15	bettong	nose hole	6	6	6	3	56.5487	102.133	143.288	28.2743
MF22A-2	1041	35	11	21	1.40296	0.0347662	0.0487758	0.47058	MF22A-2-AR	16	bettong	root	6	5	6	2.75	47.5166	86.7782	121.747	23.7583
MF22A-2	1041	35	11	21	1.40296	0.0347662	0.0487758	0.47058	MF22A-2-AR	17	unknown	scratch	9	8	0	4.25	0	6	8.41778	56.745
MF22A-2	1041	35	11	21	1.40296	0.0347662	0.0487758	0.47058	MF22A-2-AR	18	rabbit	bowl	12	7	4	4.75	94.5096	166.666	233.827	70.8822
MF22A-2	1041	35	11	21	1.40296	0.0347662	0.0487758	0.47058	MF22A-2-AR	19	bettong	nose hole	5	3	3	2	12.5664	27.3628	38.389	12.5664
MF22A-2	1041	35	11	21	1.40296	0.0347662	0.0487758	0.47058	MF22A-2-AR	20	bettong	nose hole	6	5	2	2.75	15.8389	32.9261	46.1941	23.7583
MF22A-2	1041	35	11	21	1.40296	0.0347662	0.0487758	0.47058	MF22A-2-AR	21	rabbit		9.95	6.14	2.16	4.0225	36.5994	68.2191	95.7088	50.8326
MF22A-2	1041	35	11	21	1.40296	0.0347662	0.0487758	0.47058	MF22A-2-AR	22	rabbit		9.95	6.14	2.16	4.0225	36.5994	68.2191	95.7088	50.8326
MF22A-2	1041	35	11	21	1.40296	0.0347662	0.0487758	0.47058	MF22A-2-AR	23	bettong		4.91	3.86	3.12	2.1925	15.7059	32.7	45.8769	15.1018
MF22A-2	1041	35	11	21	1.40296	0.0347662	0.0487758	0.47058	MF22A-2-AR	24	bettong		4.91	3.86	3.12	2.1925	15.7059	32.7	45.8769	15.1018
MF22A-2	1041	35	11	21	1.40296	0.0347662	0.0487758	0.47058	MF22A-2-AR	25	bettong		4.91	3.86	3.12	2.1925	15.7059	32.7	45.8769	15.1018
MF22A-2	1041	35	11	21	1.40296	0.0347662	0.0487758	0.47058	MF22A-2-AR	26	bettong		4.91	3.86	3.12	2.1925	15.7059	32.7	45.8769	15.1018
MF22A-2	1041	35	11	21	1.40296	0.0347662	0.0487758	0.47058	MF22A-2-AR	27	bettong		4.91	3.86	3.12	2.1925	15.7059	32.7	45.8769	15.1018
MF22A-2	1041	35	11	21	1.40296	0.0347662	0.0487758	0.47058	MF22A-2-AR	28	bettong		4.91	3.86	3.12	2.1925	15.7059	32.7	45.8769	15.1018
MF22A-2	1041	35	11	21	1.40296	0.0347662	0.0487758	0.47058	MF22A-2-AR	29	bettong		4.91	3.86	3.12	2.1925	15.7059	32.7	45.8769	15.1018
MF22A-2	1041	35	11	21	1.40296	0.0347662	0.0487758	0.47058	MF22A-2-AR	30	bettong		4.91	3.86	3.12	2.1925	15.7059	32.7	45.8769	15.1018
MF22A-2	1041	35	11	21	1.40296	0.0347662	0.0487758	0.47058	MF22A-2-AR	31	bettong		4.91	3.86	3.12	2.1925	15.7059	32.7	45.8769	15.1018
MF22A-2	1041	35	11	21	1.40296	0.0347662	0.0487758	0.47058	MF22A-2-AR	32	bettong		4.91	3.86	3.12	2.1925	15.7059	32.7	45.8769	15.1018
MF22A-2	1041	35	11	21	1.40296	0.0347662	0.0487758	0.47058	MF22A-2-AR	33	bettong		4.91	3.86	3.12	2.1925	15.7059	32.7	45.8769	15.1018
MF22A-2	1041	35	11	21	1.40296	0.0347662	0.0487758	0.47058	MF22A-2-AR	34	bettong		4.91	3.86	3.12	2.1925	15.7059	32.7	45.8769	15.1018
MF22A-2	1041	35	11	21	1.40296	0.0347662	0.0487758	0.47058	MF22A-2-AR	35	bettong		4.91	3.86	3.12	2.1925	15.7059	32.7	45.8769	15.1018
MF22A-2	1043	19	3	0	0.882719	0.0581883	0.0513639	0.666898	MF22A-2-BL	1	bettong	nose hole	6	4	3	2.5	19.635	39.3794	34.761	19.635
MF22A-2	1043	19	3	0	0.882719	0.0581883	0.0513639	0.666898	MF22A-2-BL	2	bird	nose hole	2	2	1	1	1.0472	7.78024	6.86777	3.14159
MF22A-2	1043	19	3	0	0.882719	0.0581883	0.0513639	0.666898	MF22A-2-BL	3	unknown	scratch	3	2	0.5	1.25	0.818123	7.39081	6.52401	4.90874
MF22A-2	1043	19	3	0	0.882719	0.0581883	0.0513639	0.666898	MF22A-2-BL	4	unknown	scratch	10	7	1	4.25	18.915	38.1555	33.6806	56.745
MF22A-2	1043	19	3	0	0.882719	0.0581883	0.0513639	0.666898	MF22A-2-BL	5	unknown	scratch	15	9	0	6	0	6	5.29632	113.097
MF22A-2	1043	19	3	0	0.882719	0.0581883	0.0513639	0.666898	MF22A-2-BL	6	bettong	nose hole	4	3	3	1.75	9.62113	22.3559	19.734	9.62113
MF22A-2	1043	19	3	0	0.882719	0.0581883	0.0513639	0.666898	MF22A-2-BL	7	unknown	scratch	20	13	2	8.25	142.55	248.335	219.21	213.825
MF22A-2	1043	19	3	0	0.882719	0.0581883	0.0513639	0.666898	MF22A-2-BL	8	unknown	gouge	12	3	4	3.75	58.9049	106.138	93.6903	44.1786
MF22A-2	1043	19	3	0	0.882719	0.0581883	0.0513639	0.666898	MF22A-2-BL	9	unknown	scratch	13	10	1	5.75	34.623	64.859	57.2523	103.869
MF22A-2	1043	19	3	0	0.882719	0.0581883	0.0513639	0.666898	MF22A-2-BL	10	unknown	scratch	8	6	1	3.5	12.8282	27.8079	24.5466	38.4845
MF22A-2	1043	19	3	0	0.882719	0.0581883	0.0513639	0.666898	MF22A-2-BL	11	bettong	bowl	5	4	2	2.25	10.6029	24.0249	21.2072	15.9043
MF22A-2	1043	19	3	0	0.882719	0.0581883	0.0513639	0.666898	MF22A-2-BL	12	unknown	scratch	19	13	0.5	8	33.5103	62.9675	55.5827	201.062
MF22A-2	1043	19	3	0	0.882719	0.0581883	0.0513639	0.666898	MF22A-2-BL	13	unknown	scratch	11	9	0.5	5	13.09	28.2529	24.9394	78.5398
MF22A-2	1043	19	3	0	0.882719	0.0581883	0.0513639	0.666898	MF22A-2-BL	14	unknown	scratch	12	10	0.5	5.5	15.8389	32.9261	29.0645	95.0332
MF22A-2	1043	19	3	0	0.882719	0.0581883	0.0513639	0.666898	MF22A-2-BL	15	bird	scratch	3	3	1	1.5	2.35619	10.0055	8.83208	7.06858
MF22A-2	1043	19	3	0	0.882719	0.0581883	0.0513639	0.666898	MF22A-2-BL	16	unknown	scratch	7	6	0.5	3.25	5.53051	15.4019	13.5955	33.1831
MF22A-2	1043	19	3	0	0.882719	0.0581883	0.0513639	0.666898	MF22A-2-BL	17	unknown	scratch	6	10	1	4	16.7552	34.4838	30.4395	50.2655
MF22A-2	1043	19	3	0	0.882719	0.0581883	0.0513639	0.666898	MF22A-2-BL	18	unknown	scratch	8	6	0.5	3.5	6.41409	16.9039	14.9214	38.4845
MF22A-2	1043	19	3	0	0.882719	0.0581883	0.0513639	0.666898	MF22A-2-BL	19	unknown	scratch	14	14	0.5	7	25.6563	49.6158	43.7968	153.938
MF22A-2	1042	9	5	2	1.09722	0.0622943	0.0683503	0.585956	MF22A-2-BR	1	bettong	nose hole	4	4	1.5	2	6.28319	16.6814	18.3031	12.5664
MF22A-2	1042	9	5	2	1.09722	0.0622943	0.0683503	0.585956	MF22A-2-BR	2	unknown	scratch	7	6	0	3.25	0	6	6.5833	33.1831
MF22A-2	1042	9	5	2	1.09722	0.0622943	0.0683503	0.585956	MF22A-2-BR	3	bettong	nose hole	5	4	4	2.25	21.2058	42.0498	46.1377	15.9043
MF22A-2	1042	9	5	2	1.09722	0.0622943	0.0683503	0.585956	MF22A-2-BR	4	bettong	nose hole	5	3	1	2	4.18879	13.1209	14.3965	12.5664
MF22A-2	1042	9	5	2	1.09722	0.0622943	0.0683503	0.585956	MF22A-2-BR	5	unknown	scratch	14	10	0	6	0	6	6.5833	113.097
MF22A-2	1042	9	5	2	1.09722	0.0622943	0.0683503	0.585956	MF22A-2-BR	6	rabbit	bowl	9	6	2	3.75	29.4524	56.0691	61.5199	44.1786
MF22A-2	1042	9	5	2	1.09722	0.0622943	0.0683503	0.585956	MF22A-2-BR	7	rabbit	bowl	9	7	2	4	33.5103	62.9675	69.089	50.2655
MF22A-2	1042	9	5	2	1.09722	0.0622943	0.0683503	0.585956	MF22A-2-BR	8	bettong	bowl	9	6	5	3.75	73.6311	131.173	143.925	44.1786
MF22A-2	1042	9	5	2	1.09722	0.0622943	0.0683503	0.585956	MF22A-2-BR	9	bettong	nose hole	5	4	3	2.25	15.9043	33.0373	36.2491	15.9043
MF22A-3	923	3	0	0	0.744686	0.366731	0.2731	0.718986	MF22A-3-AL	1	unknown	scratch	11	10	5	5.25	144.317	251.339	187.168	86.5901
MF22A-3	923	3	0	0	0.744686	0.366731	0.2731	0.718986	MF22A-3-AL	2	unknown	scratch	8	6	1	3.5	12.8282	27.8079	20.7081	38.4845
MF22A-3	923	3	0	0	0.744686	0.366731	0.2731	0.718986	MF22A-3-AL	3	unknown	nose hole	6.5	5	2	2.875	17.3115	35.4295	26.3839	25.9672
MF22A-3	922	4	0	0	1.40897	0.332783	0.46888	0.468315	MF22A-3-AR	1	unknown	scratch	9	6	1	3.75	14.7262	31.0346	43.7266	44.1786
MF22A-3	922	4	0	0	1.40897	0.332783	0.46888	0.468315	MF22A-3-AR	2	echidna	root	7	6	5	3.25	55.3051	100.019	140.923	33.1831
MF22A-3	922	4	0	0	1.40897	0.332783	0.46888	0.468315	MF22A-3-AR	3	unknown	nose hole	3.5	3	1.5	1.625	4.14788	13.0514	18.389	8.29577
MF22A-3	922	4	0	0	1.40897	0.332783	0.46888	0.468315	MF22A-3-AR	4	unknown	bowl	8	6	1.5	3.5	19.2423	38.7118	54.5436	38.4845
MF22A-3	920	10	0	0	0.997801	0.411643	0.410738	0.623471	MF22A-3-BL	1	echidna	bowl	11	11	4	5.5	126.711	221.409	220.922	95.0332
MF22A-3	920	10	0	0	0.997801	0.411643	0.410738	0.623471	MF22A-3-BL	2	echidna	scratch	33	19	1	13	176.976	306.86	306.185	530.929
MF22A-3	920	10	0	0	0.997801	0.411643	0.410738	0.623471	MF22A-3-BL	3	unknown	nose hole	3	2	3	1.25	4.90874	14.3449	14.3133	4.90874
MF22A-3	920	10	0	0	0.997801	0.411643	0.410738	0.623471	MF22A-3-BL	4	echidna	nose hole	4	4	3	2	12.5664	27.3628	27.3027	12.5664
MF22A-3	920	10	0	0	0.997801	0.411643	0.410738	0.623471	MF22A-3-BL	5	echidna	scratch	11	9	1	5	26.1799	50.5059	50.3948	78.5398
MF22A-3	920	10	0	0	0.997801	0.411643	0.410738	0.623471	MF22A-3-BL	6	echidna	bowl	21	18	9	9.75	895.943	1529.1	1525.74	298.648
MF22A-3	920	10	0	0	0.997801	0.411643	0.410738	0.623471	MF22A-3-BL	7	echidna	bowl	15	16	8	7.75	503.178	861.403	859.509	188.692
MF22A-3	920	10	0	0	0.997801	0.411643	0.410738	0.623471	MF22A-3-BL	8	echidna	bowl	9	6	2.5	3.75	36.8155	68.5864	68.4356	44.1786
MF22A-3	920	10	0	0	0.997801	0.411643	0.410738	0.623471	MF22A-3-BL	9	echidna	nose hole	11	5	4	4	67.0206	119.935	119.671	50.2655
MF22A-3	920	10	0	0	0.997801	0.411643	0.410738	0.623471	MF22A-3-BL	10	echidna	bowl	7	4	1.5	2.75	11.8791	26.1946	26.1369	23.7583
MF22A-3	921	3	0	0	0.954324	0.199792	0.190667	0.639878	MF22A-3-BR	1	echidna	bowl	16	10	11	6.5	486.685	833.365	795.3	132.732
MF22A-3	921	3	0	0	0.954324	0.199792	0.190667	0.639878	MF22A-3-BR	2	unknown	nose hole	3	2	3	1.25	4.90874	14.3449	13.6896	4.90874
MF22A-3	921	3	0	0	0.954324	0.199792	0.190667	0.639878	MF22A-3-BR	3	echidna	nose hole	6	6	3	3	28.2743	54.0664	51.5968	28.2743
MF22A-4	991	7	3	2	1.00036	0.463707	0.463873	0.622507	MF22A-4-BL	1	bird	nose hole	1.5	1	2	0.625	0.818123	7.39081	7.39345	1.22718
MF22A-4	991	7	3	2	1.00036	0.463707	0.463873	0.622507	MF22A-4-BL	2	bird	nose hole	1.5	1.5	2	0.75	1.1781	8.00277	8.00562	1.76715
MF22A-4	991	7	3	2	1.00036	0.463707	0.463873	0.622507	MF22A-4-BL	3	bettong	leaning cone	3	3	4	1.5	9.42478	22.0221	22.03	7.06858
MF22A-4	991	7	3	2	1.00036	0.463707	0.463873	0.622507	MF22A-4-BL	4	rabbit	scratch	10	4	1	3.5	12.8282	27.8079	27.8178	38.4845
MF22A-4	991	7	3	2	1.00036	0.463707	0.463873	0.622507	MF22A-4-BL	5	rabbit	scratch	8	5	1	3.25	11.061	24.8037	24.8126	33.1831
MF22A-4	991	7	3	2	1.00036	0.463707	0.463873	0.622507	MF22A-4-BL	6	bettong	bowl	4	3	3	1.75	9.62113	22.3559	22.3639	9.62113
MF22A-4	991	7	3	2	1.00036	0.463707	0.463873	0.622507	MF22A-4-BL	7	bettong	leaning cone	5	4	5	2.25	26.5072	51.0622	51.0804	15.9043
MF22A-4	990	2	1	1	1.05661	0.180797	0.191033	0.601278	MF22A-4-BR	1	rabbit	scratch	5	4	0.5	2.25	2.65072	10.5062	11.101	15.9043
MF22A-4	990	2	1	1	1.05661	0.180797	0.191033	0.601278	MF22A-4-BR	2	bettong	bowl	5	3	2	2	8.37758	20.2419	21.3879	12.5664
MF22A-4	989	22	2	19	0.941746	0.220401	0.207562	0.644624	MF22A-4-AR	1	bettong	leaning cone	4	3	3	1.75	9.62113	22.3559	21.0536	9.62113
MF22A-4	989	22	2	19	0.941746	0.220401	0.207562	0.644624	MF22A-4-AR	2	rabbit	rabbit	5	4	3	2.25	15.9043	33.0373	31.1128	15.9043
MF22A-4	989	22	2	19	0.941746	0.220401	0.207562	0.644624	MF22A-4-AR	3	rabbit	leaning cone	6	4	3	2.5	19.635	39.3794	37.0854	19.635
MF22A-4	989	22	2	19	0.941746	0.220401	0.207562	0.644624	MF22A-4-AR	4	rabbit	leaning cone	3	3	3	1.5	7.06858	18.0166	16.9671	7.06858
MF22A-4	989	22	2	19	0.941746	0.220401	0.207562	0.644624	MF22A-4-AR	5	unknown	nose hole	4	2	2	1.5	4.71239	14.0111	13.1949	7.06858
MF22A-4	989	22	2	19	0.941746	0.220401	0.207562	0.644624	MF22A-4-AR	6	bettong	bowl	3	3	2	1.5	4.71239	14.0111	13.1949	7.06858
MF22A-4	989	22	2	19	0.941746	0.220401	0.207562	0.644624	MF22A-4-AR	7	rabbit	leaning cone	5	5	3	2.5	19.635	39.3794	37.0854	19.635
MF22A-4	989	22	2	19	0.941746	0.220401	0.207562	0.644624	MF22A-4-AR	8	rabbit	leaning cone	4	3	2	1.75	6.41409	16.9039	15.9192	9.62113
MF22A-4	989	22	2	19	0.941746	0.220401	0.207562	0.644624	MF22A-4-AR	9	rabbit	scratch	2	2	1	1	1.0472	7.78024	7.32701	3.14159
MF22A-4	989	22	2	19	0.941746	0.220401	0.207562	0.644624	MF22A-4-AR	10	rabbit	leaning cone	6	6	5	3	47.1239	86.1106	81.0944	28.2743
MF22A-4	989	22	2	19	0.941746	0.220401	0.207562	0.644624	MF22A-4-AR	11	rabbit	rabbit	12	8	4	5	104.72	184.024	173.304	78.5398
MF22A-4	989	22	2	19	0.941746	0.220401	0.207562	0.644624	MF22A-4-AR	12	rabbit	scratch	5	3	2	2	8.37758	20.2419	19.0627	12.5664
MF22A-4	989	22	2	19	0.941746	0.220401	0.207562	0.644624	MF22A-4-AR	13	rabbit	leaning cone	3	2	2	1.25	3.27249	11.5632	10.8896	4.90874
MF22A-4	989	22	2	19	0.941746	0.220401	0.207562	0.644624	MF22A-4-AR	14	rabbit	leaning cone	3	2	2	1.25	3.27249	11.5632	10.8896	4.90874
MF22A-4	989	22	2	19	0.941746	0.220401	0.207562	0.644624	MF22A-4-AR	15	rabbit	leaning cone	4	3	2	1.75	6.41409	16.9039	15.9192	9.62113
MF22A-4	989	22	2	19	0.941746	0.220401	0.207562	0.644624	MF22A-4-AR	16	rabbit	scratch	7	7	1	3.5	12.8282	27.8079	26.188	38.4845
MF22A-4	989	22	2	19	0.941746	0.220401	0.207562	0.644624	MF22A-4-AR	17	rabbit	scratch	5	3	1.5	2	6.28319	16.6814	15.7097	12.5664
MF22A-4	989	22	2	19	0.941746	0.220401	0.207562	0.644624	MF22A-4-AR	18	rabbit	rabbit	9	5	4	3.5	51.3127	93.2316	87.8005	38.4845
MF22A-4	989	22	2	19	0.941746	0.220401	0.207562	0.644624	MF22A-4-AR	19	rabbit	bowl	3	3	1	1.5	2.35619	10.0055	9.42267	7.06858
MF22A-4	989	22	2	19	0.941746	0.220401	0.207562	0.644624	MF22A-4-AR	20	rabbit	leaning cone	5	4	2	2.25	10.6029	24.0249	22.6254	15.9043
MF22A-4	988	4	0	4	0.924512	0.315738	0.291903	0.651127	MF22A-4-AL	1	rabbit	leaning cone	4	3	1	1.75	3.20704	11.452	10.5875	9.62113
MF22A-4	988	4	0	4	0.924512	0.315738	0.291903	0.651127	MF22A-4-AL	2	rabbit	bowl	4	3	2	1.75	6.41409	16.9039	15.6279	9.62113
MF22A-4	988	4	0	4	0.924512	0.315738	0.291903	0.651127	MF22A-4-AL	3	rabbit	leaning cone	5	4.5	2	2.375	11.8137	26.0833	24.1143	17.7205
MF22A-4	988	4	0	4	0.924512	0.315738	0.291903	0.651127	MF22A-4-AL	4	rabbit	scratch	8	5	0.5	3.25	5.53051	15.4019	14.2392	33.1831
MF16A-3	1032	88	32	46	0.773606	0.400058	0.309487	0.708073	MF16A-3-AL	1	bettong	nose hole	8	7	4	3.75	58.9049	106.138	82.1092	44.1786
MF16A-3	1032	88	32	46	0.773606	0.400058	0.309487	0.708073	MF16A-3-AL	2	rabbit	rabbit	15	9	3.5	6	131.947	230.31	178.169	113.097
MF16A-3	1032	88	32	46	0.773606	0.400058	0.309487	0.708073	MF16A-3-AL	3	bettong	nose hole	6	4	4	2.5	26.1799	50.5059	39.0717	19.635
MF16A-3	1032	88	32	46	0.773606	0.400058	0.309487	0.708073	MF16A-3-AL	4	bettong	nose hole	8	7	4	3.75	58.9049	106.138	82.1092	44.1786
MF16A-3	1032	88	32	46	0.773606	0.400058	0.309487	0.708073	MF16A-3-AL	5	rabbit	scratch	9	4	1	3.25	11.061	24.8037	19.1883	33.1831
MF16A-3	1032	88	32	46	0.773606	0.400058	0.309487	0.708073	MF16A-3-AL	6	rabbit	scratch	5	3	1	2	4.18879	13.1209	10.1504	12.5664
MF16A-3	1032	88	32	46	0.773606	0.400058	0.309487	0.708073	MF16A-3-AL	7	bettong	nose hole	6	4	2.5	2.5	16.3625	33.8162	26.1604	19.635
MF16A-3	1032	88	32	46	0.773606	0.400058	0.309487	0.708073	MF16A-3-AL	8	bettong	nose hole	8	7	3.5	3.75	51.5418	93.621	72.4258	44.1786
MF16A-3	1032	88	32	46	0.773606	0.400058	0.309487	0.708073	MF16A-3-AL	9	bettong	nose hole	7	7	5	3.5	64.1409	115.039	88.9952	38.4845
MF16A-3	1032	88	32	46	0.773606	0.400058	0.309487	0.708073	MF16A-3-AL	10	rabbit	scratch	23	10	1.5	8.25	106.912	187.751	145.245	213.825
MF16A-3	1032	88	32	46	0.773606	0.400058	0.309487	0.708073	MF16A-3-AL	11	bettong	nose hole	8	7.5	4	3.875	62.8973	112.925	87.3598	47.173
MF16A-3	1032	88	32	46	0.773606	0.400058	0.309487	0.708073	MF16A-3-AL	12	bettong	nose hole	4	4	3	2	12.5664	27.3628	21.168	12.5664
MF16A-3	1032	88	32	46	0.773606	0.400058	0.309487	0.708073	MF16A-3-AL	13	rabbit	rabbit	12	6	2.5	4.5	53.0144	96.1244	74.3624	63.6173
MF16A-3	1032	88	32	46	0.773606	0.400058	0.309487	0.708073	MF16A-3-AL	14	rabbit	scratch	10	7	0.5	4.25	9.4575	22.0778	17.0795	56.745
MF16A-3	1032	88	32	46	0.773606	0.400058	0.309487	0.708073	MF16A-3-AL	15	rabbit	nose hole	7	6	4.5	3.25	49.7746	90.6168	70.1017	33.1831
MF16A-3	1032	88	32	46	0.773606	0.400058	0.309487	0.708073	MF16A-3-AL	16	rabbit	scratch	14	8	1	5.5	31.6777	59.8521	46.302	95.0332
MF16A-3	1032	88	32	46	0.773606	0.400058	0.309487	0.708073	MF16A-3-AL	17	bettong	nose hole	5	4.5	3	2.375	17.7205	36.1249	27.9465	17.7205
MF16A-3	1032	88	32	46	0.773606	0.400058	0.309487	0.708073	MF16A-3-AL	18	rabbit	scratch	8	5.5	1	3.375	11.9282	26.278	20.3288	35.7847
MF16A-3	1032	88	32	46	0.773606	0.400058	0.309487	0.708073	MF16A-3-AL	19	bettong	root	5.5	5	2	2.625	14.4317	30.5339	23.6212	21.6475
MF16A-3	1032	88	32	46	0.773606	0.400058	0.309487	0.708073	MF16A-3-AL	20	bettong	nose hole	8	7	3.5	3.75	51.5418	93.621	72.4258	44.1786
MF16A-3	1032	88	32	46	0.773606	0.400058	0.309487	0.708073	MF16A-3-AL	21	unknown		7.19	4.91	1.65	3.025	15.8111	32.8789	25.4354	28.7475
MF16A-3	1032	88	32	46	0.773606	0.400058	0.309487	0.708073	MF16A-3-AL	22	unknown		7.19	4.91	1.65	3.025	15.8111	32.8789	25.4354	28.7475
MF16A-3	1032	88	32	46	0.773606	0.400058	0.309487	0.708073	MF16A-3-AL	23	unknown		7.19	4.91	1.65	3.025	15.8111	32.8789	25.4354	28.7475
MF16A-3	1032	88	32	46	0.773606	0.400058	0.309487	0.708073	MF16A-3-AL	24	unknown		7.19	4.91	1.65	3.025	15.8111	32.8789	25.4354	28.7475
MF16A-3	1032	88	32	46	0.773606	0.400058	0.309487	0.708073	MF16A-3-AL	25	unknown		7.19	4.91	1.65	3.025	15.8111	32.8789	25.4354	28.7475
MF16A-3	1032	88	32	46	0.773606	0.400058	0.309487	0.708073	MF16A-3-AL	26	unknown		7.19	4.91	1.65	3.025	15.8111	32.8789	25.4354	28.7475
MF16A-3	1032	88	32	46	0.773606	0.400058	0.309487	0.708073	MF16A-3-AL	27	bird		4.69	3.03	1.79	1.93	6.98226	17.8698	13.8242	11.7021
MF16A-3	1032	88	32	46	0.773606	0.400058	0.309487	0.708073	MF16A-3-AL	28	bird		4.69	3.03	1.79	1.93	6.98226	17.8698	13.8242	11.7021
MF16A-3	1032	88	32	46	0.773606	0.400058	0.309487	0.708073	MF16A-3-AL	29	bird		4.69	3.03	1.79	1.93	6.98226	17.8698	13.8242	11.7021
MF16A-3	1032	88	32	46	0.773606	0.400058	0.309487	0.708073	MF16A-3-AL	30	bird		4.69	3.03	1.79	1.93	6.98226	17.8698	13.8242	11.7021
MF16A-3	1032	88	32	46	0.773606	0.400058	0.309487	0.708073	MF16A-3-AL	31	rabbit		9.95	6.14	2.16	4.0225	36.5994	68.2191	52.7747	50.8326
MF16A-3	1032	88	32	46	0.773606	0.400058	0.309487	0.708073	MF16A-3-AL	32	rabbit		9.95	6.14	2.16	4.0225	36.5994	68.2191	52.7747	50.8326
MF16A-3	1032	88	32	46	0.773606	0.400058	0.309487	0.708073	MF16A-3-AL	33	rabbit		9.95	6.14	2.16	4.0225	36.5994	68.2191	52.7747	50.8326
MF16A-3	1032	88	32	46	0.773606	0.400058	0.309487	0.708073	MF16A-3-AL	34	rabbit		9.95	6.14	2.16	4.0225	36.5994	68.2191	52.7747	50.8326
MF16A-3	1032	88	32	46	0.773606	0.400058	0.309487	0.708073	MF16A-3-AL	35	rabbit		9.95	6.14	2.16	4.0225	36.5994	68.2191	52.7747	50.8326
MF16A-3	1032	88	32	46	0.773606	0.400058	0.309487	0.708073	MF16A-3-AL	36	rabbit		9.95	6.14	2.16	4.0225	36.5994	68.2191	52.7747	50.8326
MF16A-3	1032	88	32	46	0.773606	0.400058	0.309487	0.708073	MF16A-3-AL	37	rabbit		9.95	6.14	2.16	4.0225	36.5994	68.2191	52.7747	50.8326
MF16A-3	1032	88	32	46	0.773606	0.400058	0.309487	0.708073	MF16A-3-AL	38	rabbit		9.95	6.14	2.16	4.0225	36.5994	68.2191	52.7747	50.8326
MF16A-3	1032	88	32	46	0.773606	0.400058	0.309487	0.708073	MF16A-3-AL	39	rabbit		9.95	6.14	2.16	4.0225	36.5994	68.2191	52.7747	50.8326
MF16A-3	1032	88	32	46	0.773606	0.400058	0.309487	0.708073	MF16A-3-AL	40	rabbit		9.95	6.14	2.16	4.0225	36.5994	68.2191	52.7747	50.8326
MF16A-3	1032	88	32	46	0.773606	0.400058	0.309487	0.708073	MF16A-3-AL	41	rabbit		9.95	6.14	2.16	4.0225	36.5994	68.2191	52.7747	50.8326
MF16A-3	1032	88	32	46	0.773606	0.400058	0.309487	0.708073	MF16A-3-AL	42	rabbit		9.95	6.14	2.16	4.0225	36.5994	68.2191	52.7747	50.8326
MF16A-3	1032	88	32	46	0.773606	0.400058	0.309487	0.708073	MF16A-3-AL	43	rabbit		9.95	6.14	2.16	4.0225	36.5994	68.2191	52.7747	50.8326
MF16A-3	1032	88	32	46	0.773606	0.400058	0.309487	0.708073	MF16A-3-AL	44	rabbit		9.95	6.14	2.16	4.0225	36.5994	68.2191	52.7747	50.8326
MF16A-3	1032	88	32	46	0.773606	0.400058	0.309487	0.708073	MF16A-3-AL	45	rabbit		9.95	6.14	2.16	4.0225	36.5994	68.2191	52.7747	50.8326
MF16A-3	1032	88	32	46	0.773606	0.400058	0.309487	0.708073	MF16A-3-AL	46	rabbit		9.95	6.14	2.16	4.0225	36.5994	68.2191	52.7747	50.8326
MF16A-3	1032	88	32	46	0.773606	0.400058	0.309487	0.708073	MF16A-3-AL	47	rabbit		9.95	6.14	2.16	4.0225	36.5994	68.2191	52.7747	50.8326
MF16A-3	1032	88	32	46	0.773606	0.400058	0.309487	0.708073	MF16A-3-AL	48	rabbit		9.95	6.14	2.16	4.0225	36.5994	68.2191	52.7747	50.8326
MF16A-3	1032	88	32	46	0.773606	0.400058	0.309487	0.708073	MF16A-3-AL	49	rabbit		9.95	6.14	2.16	4.0225	36.5994	68.2191	52.7747	50.8326
MF16A-3	1032	88	32	46	0.773606	0.400058	0.309487	0.708073	MF16A-3-AL	50	rabbit		9.95	6.14	2.16	4.0225	36.5994	68.2191	52.7747	50.8326
MF16A-3	1032	88	32	46	0.773606	0.400058	0.309487	0.708073	MF16A-3-AL	51	rabbit		9.95	6.14	2.16	4.0225	36.5994	68.2191	52.7747	50.8326
MF16A-3	1032	88	32	46	0.773606	0.400058	0.309487	0.708073	MF16A-3-AL	52	rabbit		9.95	6.14	2.16	4.0225	36.5994	68.2191	52.7747	50.8326
MF16A-3	1032	88	32	46	0.773606	0.400058	0.309487	0.708073	MF16A-3-AL	53	rabbit		9.95	6.14	2.16	4.0225	36.5994	68.2191	52.7747	50.8326
MF16A-3	1032	88	32	46	0.773606	0.400058	0.309487	0.708073	MF16A-3-AL	54	rabbit		9.95	6.14	2.16	4.0225	36.5994	68.2191	52.7747	50.8326
MF16A-3	1032	88	32	46	0.773606	0.400058	0.309487	0.708073	MF16A-3-AL	55	rabbit		9.95	6.14	2.16	4.0225	36.5994	68.2191	52.7747	50.8326
MF16A-3	1032	88	32	46	0.773606	0.400058	0.309487	0.708073	MF16A-3-AL	56	rabbit		9.95	6.14	2.16	4.0225	36.5994	68.2191	52.7747	50.8326
MF16A-3	1032	88	32	46	0.773606	0.400058	0.309487	0.708073	MF16A-3-AL	57	rabbit		9.95	6.14	2.16	4.0225	36.5994	68.2191	52.7747	50.8326
MF16A-3	1032	88	32	46	0.773606	0.400058	0.309487	0.708073	MF16A-3-AL	58	rabbit		9.95	6.14	2.16	4.0225	36.5994	68.2191	52.7747	50.8326
MF16A-3	1032	88	32	46	0.773606	0.400058	0.309487	0.708073	MF16A-3-AL	59	rabbit		9.95	6.14	2.16	4.0225	36.5994	68.2191	52.7747	50.8326
MF16A-3	1032	88	32	46	0.773606	0.400058	0.309487	0.708073	MF16A-3-AL	60	rabbit		9.95	6.14	2.16	4.0225	36.5994	68.2191	52.7747	50.8326
MF16A-3	1032	88	32	46	0.773606	0.400058	0.309487	0.708073	MF16A-3-AL	61	rabbit		9.95	6.14	2.16	4.0225	36.5994	68.2191	52.7747	50.8326
MF16A-3	1032	88	32	46	0.773606	0.400058	0.309487	0.708073	MF16A-3-AL	62	rabbit		9.95	6.14	2.16	4.0225	36.5994	68.2191	52.7747	50.8326
MF16A-3	1032	88	32	46	0.773606	0.400058	0.309487	0.708073	MF16A-3-AL	63	rabbit		9.95	6.14	2.16	4.0225	36.5994	68.2191	52.7747	50.8326
MF16A-3	1032	88	32	46	0.773606	0.400058	0.309487	0.708073	MF16A-3-AL	64	rabbit		9.95	6.14	2.16	4.0225	36.5994	68.2191	52.7747	50.8326
MF16A-3	1032	88	32	46	0.773606	0.400058	0.309487	0.708073	MF16A-3-AL	65	rabbit		9.95	6.14	2.16	4.0225	36.5994	68.2191	52.7747	50.8326
MF16A-3	1032	88	32	46	0.773606	0.400058	0.309487	0.708073	MF16A-3-AL	66	rabbit		9.95	6.14	2.16	4.0225	36.5994	68.2191	52.7747	50.8326
MF16A-3	1032	88	32	46	0.773606	0.400058	0.309487	0.708073	MF16A-3-AL	67	rabbit		9.95	6.14	2.16	4.0225	36.5994	68.2191	52.7747	50.8326
MF16A-3	1032	88	32	46	0.773606	0.400058	0.309487	0.708073	MF16A-3-AL	68	bettong		4.91	3.86	3.12	2.1925	15.7059	32.7	25.2969	15.1018
MF16A-3	1032	88	32	46	0.773606	0.400058	0.309487	0.708073	MF16A-3-AL	69	bettong		4.91	3.86	3.12	2.1925	15.7059	32.7	25.2969	15.1018
MF16A-3	1032	88	32	46	0.773606	0.400058	0.309487	0.708073	MF16A-3-AL	70	bettong		4.91	3.86	3.12	2.1925	15.7059	32.7	25.2969	15.1018
MF16A-3	1032	88	32	46	0.773606	0.400058	0.309487	0.708073	MF16A-3-AL	71	bettong		4.91	3.86	3.12	2.1925	15.7059	32.7	25.2969	15.1018
MF16A-3	1032	88	32	46	0.773606	0.400058	0.309487	0.708073	MF16A-3-AL	72	bettong		4.91	3.86	3.12	2.1925	15.7059	32.7	25.2969	15.1018
MF16A-3	1032	88	32	46	0.773606	0.400058	0.309487	0.708073	MF16A-3-AL	73	bettong		4.91	3.86	3.12	2.1925	15.7059	32.7	25.2969	15.1018
MF16A-3	1032	88	32	46	0.773606	0.400058	0.309487	0.708073	MF16A-3-AL	74	bettong		4.91	3.86	3.12	2.1925	15.7059	32.7	25.2969	15.1018
MF16A-3	1032	88	32	46	0.773606	0.400058	0.309487	0.708073	MF16A-3-AL	75	bettong		4.91	3.86	3.12	2.1925	15.7059	32.7	25.2969	15.1018
MF16A-3	1032	88	32	46	0.773606	0.400058	0.309487	0.708073	MF16A-3-AL	76	bettong		4.91	3.86	3.12	2.1925	15.7059	32.7	25.2969	15.1018
MF16A-3	1032	88	32	46	0.773606	0.400058	0.309487	0.708073	MF16A-3-AL	77	bettong		4.91	3.86	3.12	2.1925	15.7059	32.7	25.2969	15.1018
MF16A-3	1032	88	32	46	0.773606	0.400058	0.309487	0.708073	MF16A-3-AL	78	bettong		4.91	3.86	3.12	2.1925	15.7059	32.7	25.2969	15.1018
MF16A-3	1032	88	32	46	0.773606	0.400058	0.309487	0.708073	MF16A-3-AL	79	bettong		4.91	3.86	3.12	2.1925	15.7059	32.7	25.2969	15.1018
MF16A-3	1032	88	32	46	0.773606	0.400058	0.309487	0.708073	MF16A-3-AL	80	bettong		4.91	3.86	3.12	2.1925	15.7059	32.7	25.2969	15.1018
MF16A-3	1032	88	32	46	0.773606	0.400058	0.309487	0.708073	MF16A-3-AL	81	bettong		4.91	3.86	3.12	2.1925	15.7059	32.7	25.2969	15.1018
MF16A-3	1032	88	32	46	0.773606	0.400058	0.309487	0.708073	MF16A-3-AL	82	bettong		4.91	3.86	3.12	2.1925	15.7059	32.7	25.2969	15.1018
MF16A-3	1032	88	32	46	0.773606	0.400058	0.309487	0.708073	MF16A-3-AL	83	bettong		4.91	3.86	3.12	2.1925	15.7059	32.7	25.2969	15.1018
MF16A-3	1032	88	32	46	0.773606	0.400058	0.309487	0.708073	MF16A-3-AL	84	bettong		4.91	3.86	3.12	2.1925	15.7059	32.7	25.2969	15.1018
MF16A-3	1032	88	32	46	0.773606	0.400058	0.309487	0.708073	MF16A-3-AL	85	bettong		4.91	3.86	3.12	2.1925	15.7059	32.7	25.2969	15.1018
MF16A-3	1032	88	32	46	0.773606	0.400058	0.309487	0.708073	MF16A-3-AL	86	bettong		4.91	3.86	3.12	2.1925	15.7059	32.7	25.2969	15.1018
MF16A-3	1032	88	32	46	0.773606	0.400058	0.309487	0.708073	MF16A-3-AL	87	bettong		4.91	3.86	3.12	2.1925	15.7059	32.7	25.2969	15.1018
MF16A-3	1032	88	32	46	0.773606	0.400058	0.309487	0.708073	MF16A-3-AL	88	bettong		4.91	3.86	3.12	2.1925	15.7059	32.7	25.2969	15.1018
MF16A-3	1033	25	18	5	1.09133	0.102558	0.111925	0.588176	MF16A-3-AR	1	bettong	nose hole	5	5	4	2.5	26.1799	50.5059	55.1188	19.635
MF16A-3	1033	25	18	5	1.09133	0.102558	0.111925	0.588176	MF16A-3-AR	2	bettong	nose hole	6	5	6	2.75	47.5166	86.7782	94.7039	23.7583
MF16A-3	1033	25	18	5	1.09133	0.102558	0.111925	0.588176	MF16A-3-AR	3	rabbit	scratch	15	10	2	6.25	81.8123	145.081	158.332	122.718
MF16A-3	1033	25	18	5	1.09133	0.102558	0.111925	0.588176	MF16A-3-AR	4	bird	nose hole	4	4	3	2	12.5664	27.3628	29.862	12.5664
MF16A-3	1033	25	18	5	1.09133	0.102558	0.111925	0.588176	MF16A-3-AR	5	bettong	nose hole	5	4	4	2.25	21.2058	42.0498	45.8903	15.9043
MF16A-3	1033	25	18	5	1.09133	0.102558	0.111925	0.588176	MF16A-3-AR	6	rabbit	bowl	11	7	2	4.5	42.4115	78.0996	85.2326	63.6173
MF16A-3	1033	25	18	5	1.09133	0.102558	0.111925	0.588176	MF16A-3-AR	7	bettong	nose hole	5	4	3	2.25	15.9043	33.0373	36.0547	15.9043
MF16A-3	1033	25	18	5	1.09133	0.102558	0.111925	0.588176	MF16A-3-AR	8	bettong	nose hole	5	4	3	2.25	15.9043	33.0373	36.0547	15.9043
MF16A-3	1033	25	18	5	1.09133	0.102558	0.111925	0.588176	MF16A-3-AR	9	bettong	nose hole	4	4	3	2	12.5664	27.3628	29.862	12.5664
MF16A-3	1033	25	18	5	1.09133	0.102558	0.111925	0.588176	MF16A-3-AR	10	bird	nose hole	4	3	2	1.75	6.41409	16.9039	18.4478	9.62113
MF16A-3	1033	25	18	5	1.09133	0.102558	0.111925	0.588176	MF16A-3-AR	11	bettong	nose hole	5	3	4	2	16.7552	34.4838	37.6333	12.5664
MF16A-3	1033	25	18	5	1.09133	0.102558	0.111925	0.588176	MF16A-3-AR	12	bettong	nose hole	6	5	3	2.75	23.7583	46.3891	50.626	23.7583
MF16A-3	1033	25	18	5	1.09133	0.102558	0.111925	0.588176	MF16A-3-AR	13	bettong	nose hole	5	4	3	2.25	15.9043	33.0373	36.0547	15.9043
MF16A-3	1033	25	18	5	1.09133	0.102558	0.111925	0.588176	MF16A-3-AR	14	bettong	bowl	5	5	2	2.5	13.09	28.2529	30.8334	19.635
MF16A-3	1033	25	18	5	1.09133	0.102558	0.111925	0.588176	MF16A-3-AR	15	bettong	nose hole	5	3	3	2	12.5664	27.3628	29.862	12.5664
MF16A-3	1033	25	18	5	1.09133	0.102558	0.111925	0.588176	MF16A-3-AR	16	bettong	nose hole	6	4	4	2.5	26.1799	50.5059	55.1188	19.635
MF16A-3	1033	25	18	5	1.09133	0.102558	0.111925	0.588176	MF16A-3-AR	17	bettong	nose hole	7	5	5	3	47.1239	86.1106	93.9754	28.2743
MF16A-3	1033	25	18	5	1.09133	0.102558	0.111925	0.588176	MF16A-3-AR	18	rabbit	rabbit	11	7	2	4.5	42.4115	78.0996	85.2326	63.6173
MF16A-3	1033	25	18	5	1.09133	0.102558	0.111925	0.588176	MF16A-3-AR	19	bettong	nose hole	4	4	3	2	12.5664	27.3628	29.862	12.5664
MF16A-3	1033	25	18	5	1.09133	0.102558	0.111925	0.588176	MF16A-3-AR	20	bettong	nose hole	4	3	3	1.75	9.62113	22.3559	24.3977	9.62113
MF16A-3	1033	25	18	5	1.09133	0.102558	0.111925	0.588176	MF16A-3-AR	21	rabbit		9.95	6.14	2.16	4.0225	36.5994	68.2191	74.4497	50.8326
MF16A-3	1033	25	18	5	1.09133	0.102558	0.111925	0.588176	MF16A-3-AR	22	rabbit		9.95	6.14	2.16	4.0225	36.5994	68.2191	74.4497	50.8326
MF16A-3	1033	25	18	5	1.09133	0.102558	0.111925	0.588176	MF16A-3-AR	23	bettong		4.91	3.86	3.12	2.1925	15.7059	32.7	35.6866	15.1018
MF16A-3	1033	25	18	5	1.09133	0.102558	0.111925	0.588176	MF16A-3-AR	24	bettong		4.91	3.86	3.12	2.1925	15.7059	32.7	35.6866	15.1018
MF16A-3	1033	25	18	5	1.09133	0.102558	0.111925	0.588176	MF16A-3-AR	25	bettong		4.91	3.86	3.12	2.1925	15.7059	32.7	35.6866	15.1018
MF16A-3	1035	2	0	2	0.804731	0.139694	0.112416	0.696328	MF16A-3-BL	1	rabbit	bowl	11	9	2	5	52.3599	95.0118	76.4589	78.5398
MF16A-3	1035	2	0	2	0.804731	0.139694	0.112416	0.696328	MF16A-3-BL	2	rabbit	scratch	7	4	0.5	2.75	3.95972	12.7315	10.2454	23.7583
MF16A-3	1034	17	7	9	0.803977	0.0816692	0.0656602	0.696612	MF16A-3-BR	1	bettong	nose hole	7	6	4	3.25	44.2441	81.215	65.295	33.1831
MF16A-3	1034	17	7	9	0.803977	0.0816692	0.0656602	0.696612	MF16A-3-BR	2	rabbit	bowl	6	4	2	2.5	13.09	28.2529	22.7147	19.635
MF16A-3	1034	17	7	9	0.803977	0.0816692	0.0656602	0.696612	MF16A-3-BR	3	bettong	nose hole	6	6	3	3	28.2743	54.0664	43.4681	28.2743
MF16A-3	1034	17	7	9	0.803977	0.0816692	0.0656602	0.696612	MF16A-3-BR	4	rabbit	rabbit	25	8	4	8.25	285.1	490.669	394.487	213.825
MF16A-3	1034	17	7	9	0.803977	0.0816692	0.0656602	0.696612	MF16A-3-BR	5	rabbit	scratch	10	6	2	4	33.5103	62.9675	50.6245	50.2655
MF16A-3	1034	17	7	9	0.803977	0.0816692	0.0656602	0.696612	MF16A-3-BR	6	bettong	nose hole	4	3.5	5	1.875	18.4078	37.2932	29.9829	11.0447
MF16A-3	1034	17	7	9	0.803977	0.0816692	0.0656602	0.696612	MF16A-3-BR	7	bettong	nose hole	5	3	4	2	16.7552	34.4838	27.7242	12.5664
MF16A-3	1034	17	7	9	0.803977	0.0816692	0.0656602	0.696612	MF16A-3-BR	8	rabbit	bowl	7	4	1	2.75	7.91943	19.463	15.6478	23.7583
MF16A-3	1034	17	7	9	0.803977	0.0816692	0.0656602	0.696612	MF16A-3-BR	9	rabbit	bowl	13	10	3	5.75	103.869	182.577	146.788	103.869
MF16A-3	1034	17	7	9	0.803977	0.0816692	0.0656602	0.696612	MF16A-3-BR	10	bettong	nose hole	6	4	5	2.5	32.7249	61.6324	49.551	19.635
MF16A-3	1034	17	7	9	0.803977	0.0816692	0.0656602	0.696612	MF16A-3-BR	11	unknown	bowl	12	11	3	5.75	103.869	182.577	146.788	103.869
MF16A-3	1034	17	7	9	0.803977	0.0816692	0.0656602	0.696612	MF16A-3-BR	12	rabbit	rabbit	14	7	4	5.25	115.454	202.271	162.621	86.5901
MF16A-3	1034	17	7	9	0.803977	0.0816692	0.0656602	0.696612	MF16A-3-BR	13	rabbit	scratch	14	6	1	5	26.1799	50.5059	40.6056	78.5398
MF16A-3	1034	17	7	9	0.803977	0.0816692	0.0656602	0.696612	MF16A-3-BR	14	rabbit	rabbit	15	7	3	5.5	95.0332	167.556	134.712	95.0332
MF16A-3	1034	17	7	9	0.803977	0.0816692	0.0656602	0.696612	MF16A-3-BR	15	rabbit	bowl	6	4	2	2.5	13.09	28.2529	22.7147	19.635
MF16A-3	1034	17	7	9	0.803977	0.0816692	0.0656602	0.696612	MF16A-3-BR	16	bettong	nose hole	6	6	6	3	56.5487	102.133	82.1124	28.2743
MF16A-3	1034	17	7	9	0.803977	0.0816692	0.0656602	0.696612	MF16A-3-BR	17	bettong	nose hole	4	3	3	1.75	9.62113	22.3559	17.9737	9.62113
MF22AZ-1	875	5	0	0	1.13334	0.436296	0.494472	0.572324	MF22AZ-1-AL	1	bird	nose hole	2	1	1.5	0.75	0.883573	7.50207	8.5024	1.76715
MF22AZ-1	875	5	0	0	1.13334	0.436296	0.494472	0.572324	MF22AZ-1-AL	2	bird	nose hole	5	3	3.5	2	14.6608	30.9233	35.0466	12.5664
MF22AZ-1	875	5	0	0	1.13334	0.436296	0.494472	0.572324	MF22AZ-1-AL	3	bird	nose hole	2	1.5	5	0.875	4.0088	12.815	14.5237	2.40528
MF22AZ-1	875	5	0	0	1.13334	0.436296	0.494472	0.572324	MF22AZ-1-AL	4	bird	nose hole	3	2	2	1.25	3.27249	11.5632	13.1051	4.90874
MF22AZ-1	875	5	0	0	1.13334	0.436296	0.494472	0.572324	MF22AZ-1-AL	5	bird	nose hole	3	2.5	5	1.375	9.89929	22.8288	25.8728	5.93957
MF22AZ-1	874	7	1	3	1.09415	0.389534	0.42621	0.587112	MF22AZ-1-AR	1	bird	nose hole	2	1.5	1	0.875	0.801761	7.36299	8.05625	2.40528
MF22AZ-1	874	7	1	3	1.09415	0.389534	0.42621	0.587112	MF22AZ-1-AR	2	bird	scratch	9	4.5	0	3.375	0	6	6.56492	35.7847
MF22AZ-1	874	7	1	3	1.09415	0.389534	0.42621	0.587112	MF22AZ-1-AR	3	rabbit	scratch	8	4	0.5	3	4.71239	14.0111	15.3303	28.2743
MF22AZ-1	874	7	1	3	1.09415	0.389534	0.42621	0.587112	MF22AZ-1-AR	4	bird	scratch	10	3	0.5	3.25	5.53051	15.4019	16.852	33.1831
MF22AZ-1	874	7	1	3	1.09415	0.389534	0.42621	0.587112	MF22AZ-1-AR	5	bettong	nose hole	3	3	2	1.5	4.71239	14.0111	15.3303	7.06858
MF22AZ-1	874	7	1	3	1.09415	0.389534	0.42621	0.587112	MF22AZ-1-AR	6	rabbit	scratch	12	7	0.5	4.75	11.8137	26.0833	28.5391	70.8822
MF22AZ-1	874	7	1	3	1.09415	0.389534	0.42621	0.587112	MF22AZ-1-AR	7	rabbit	rabbit	14	7	4	5.25	115.454	202.271	221.316	86.5901
MF22AZ-1	872	2	1	0	1.19036	0.294998	0.351153	0.550809	MF22AZ-1-BL	1	bettong	nose hole	4	3	3	1.75	9.62113	22.3559	26.6115	9.62113
MF22AZ-1	872	2	1	0	1.19036	0.294998	0.351153	0.550809	MF22AZ-1-BL	2	unknown	nose hole	2	1	1	0.75	0.589049	7.00138	8.33414	1.76715
MF22AZ-1	873	2	0	0	1.39857	0.175864	0.245957	0.472239	MF22AZ-1-BR	1	unknown	bowl	6	4.5	1.5	2.625	10.8238	24.4004	34.1256	21.6475
MF22AZ-1	873	2	0	0	1.39857	0.175864	0.245957	0.472239	MF22AZ-1-BR	2	unknown	nose hole	6	4	3	2.5	19.635	39.3794	55.0747	19.635
MF22AZ-2	930	8	0	8	1.2887	0.365473	0.470987	0.513697	MF22AZ-2-AR	1	rabbit	scratch	10	6.5	0.5	4.125	8.90936	21.1459	27.2508	53.4562
MF22AZ-2	930	8	0	8	1.2887	0.365473	0.470987	0.513697	MF22AZ-2-AR	2	rabbit	rabbit	12	9	8	5.25	230.907	398.542	513.602	86.5901
MF22AZ-2	930	8	0	8	1.2887	0.365473	0.470987	0.513697	MF22AZ-2-AR	3	rabbit	scratch	6	4	0.5	2.5	3.27249	11.5632	14.9016	19.635
MF22AZ-2	930	8	0	8	1.2887	0.365473	0.470987	0.513697	MF22AZ-2-AR	4	rabbit	scratch	12	6	0.5	4.5	10.6029	24.0249	30.9609	63.6173
MF22AZ-2	930	8	0	8	1.2887	0.365473	0.470987	0.513697	MF22AZ-2-AR	5	rabbit	scratch	13	7	0.5	5	13.09	28.2529	36.4097	78.5398
MF22AZ-2	930	8	0	8	1.2887	0.365473	0.470987	0.513697	MF22AZ-2-AR	6	rabbit	scratch	11	3	0.5	3.5	6.41409	16.9039	21.7842	38.4845
MF22AZ-2	930	8	0	8	1.2887	0.365473	0.470987	0.513697	MF22AZ-2-AR	7	rabbit	scratch	8	5	0.5	3.25	5.53051	15.4019	19.8484	33.1831
MF22AZ-2	930	8	0	8	1.2887	0.365473	0.470987	0.513697	MF22AZ-2-AR	8	rabbit	scratch	12	4	0.5	4	8.37758	20.2419	26.0858	50.2655
MF22AZ-2	928	3	0	3	1.46915	0.234116	0.343952	0.445603	MF22AZ-2-BL	1	rabbit	rabbit	9	5	2	3.5	25.6563	49.6158	72.8931	38.4845
MF22AZ-2	928	3	0	3	1.46915	0.234116	0.343952	0.445603	MF22AZ-2-BL	2	rabbit	rabbit	7	4	3	2.75	23.7583	46.3891	68.1526	23.7583
MF22AZ-2	928	3	0	3	1.46915	0.234116	0.343952	0.445603	MF22AZ-2-BL	3	rabbit	scratch	10	7	1	4.25	18.915	38.1555	56.0562	56.745
MF22AZ-2	929	6	0	5	1.44722	0.333749	0.483007	0.453881	MF22AZ-2-BR	1	rabbit	scratch	9	3	0.5	3	4.71239	14.0111	20.277	28.2743
MF22AZ-2	929	6	0	5	1.44722	0.333749	0.483007	0.453881	MF22AZ-2-BR	2	rabbit	rabbit	5	3	3	2	12.5664	27.3628	39.5999	12.5664
MF22AZ-2	929	6	0	5	1.44722	0.333749	0.483007	0.453881	MF22AZ-2-BR	3	rabbit	scratch	6	3.5	0.5	2.375	2.95342	11.0208	15.9495	17.7205
MF22AZ-2	929	6	0	5	1.44722	0.333749	0.483007	0.453881	MF22AZ-2-BR	4	bird	nose hole	1.5	1	1.5	0.625	0.613592	7.04311	10.1929	1.22718
MF22AZ-2	929	6	0	5	1.44722	0.333749	0.483007	0.453881	MF22AZ-2-BR	5	rabbit	scratch	7	6	1	3.25	11.061	24.8037	35.8964	33.1831
MF22AZ-2	929	6	0	5	1.44722	0.333749	0.483007	0.453881	MF22AZ-2-BR	6	rabbit	rabbit	10	5	4	3.75	58.9049	106.138	153.605	44.1786
MF22AZ-3	903	9	0	0	0.76527	0.897042	0.686479	0.711219	MF22AZ-3-AL	1	unknown	scratch	3.5	4.5	0.5	2	2.0944	9.56047	7.31634	12.5664
MF22AZ-3	903	9	0	0	0.76527	0.897042	0.686479	0.711219	MF22AZ-3-AL	2	unknown	nose hole	4	2.5	1	1.625	2.76526	10.7009	8.1891	8.29577
MF22AZ-3	903	9	0	0	0.76527	0.897042	0.686479	0.711219	MF22AZ-3-AL	3	unknown	scratch	9	4	0.5	3.25	5.53051	15.4019	11.7866	33.1831
MF22AZ-3	903	9	0	0	0.76527	0.897042	0.686479	0.711219	MF22AZ-3-AL	4	unknown	scratch	6	4	0.5	2.5	3.27249	11.5632	8.849	19.635
MF22AZ-3	903	9	0	0	0.76527	0.897042	0.686479	0.711219	MF22AZ-3-AL	5	bird	nose hole	1.5	1	1.5	0.625	0.613592	7.04311	5.38988	1.22718
MF22AZ-3	903	9	0	0	0.76527	0.897042	0.686479	0.711219	MF22AZ-3-AL	6	bird	nose hole	1.5	1.5	2	0.75	1.1781	8.00277	6.12427	1.76715
MF22AZ-3	903	9	0	0	0.76527	0.897042	0.686479	0.711219	MF22AZ-3-AL	7	bird	nose hole	2	1.5	2	0.875	1.60352	8.72599	6.67773	2.40528
MF22AZ-3	903	9	0	0	0.76527	0.897042	0.686479	0.711219	MF22AZ-3-AL	8	unknown	gouge	8.5	1.5	2.5	2.5	16.3625	33.8162	25.8785	19.635
MF22AZ-3	903	9	0	0	0.76527	0.897042	0.686479	0.711219	MF22AZ-3-AL	9	unknown	bowl	4	3.5	1	1.875	3.68155	12.2586	9.38117	11.0447
MF22AZ-3	902	22	2	13	1.1776	0.442915	0.521577	0.555622	MF22AZ-3-AR	1	bird	nose hole	4	2	1	1.5	2.35619	10.0055	11.7825	7.06858
MF22AZ-3	902	22	2	13	1.1776	0.442915	0.521577	0.555622	MF22AZ-3-AR	2	rabbit	bowl	12	4	1	4	16.7552	34.4838	40.6081	50.2655
MF22AZ-3	902	22	2	13	1.1776	0.442915	0.521577	0.555622	MF22AZ-3-AR	3	bird	bowl	4	4	1	2	4.18879	13.1209	15.4512	12.5664
MF22AZ-3	902	22	2	13	1.1776	0.442915	0.521577	0.555622	MF22AZ-3-AR	4	bettong	nose hole	2.5	2	4	1.125	5.30144	15.0124	17.6787	3.97608
MF22AZ-3	902	22	2	13	1.1776	0.442915	0.521577	0.555622	MF22AZ-3-AR	5	rabbit	bowl	4	3	1	1.75	3.20704	11.452	13.4859	9.62113
MF22AZ-3	902	22	2	13	1.1776	0.442915	0.521577	0.555622	MF22AZ-3-AR	6	rabbit	rabbit	11	7	3.5	4.5	74.2201	132.174	155.648	63.6173
MF22AZ-3	902	22	2	13	1.1776	0.442915	0.521577	0.555622	MF22AZ-3-AR	7	rabbit	bowl	4	3.5	0.5	1.875	1.84078	9.12932	10.7507	11.0447
MF22AZ-3	902	22	2	13	1.1776	0.442915	0.521577	0.555622	MF22AZ-3-AR	8	rabbit	rabbit	9.5	6	2.5	3.875	39.3108	72.8284	85.7628	47.173
MF22AZ-3	902	22	2	13	1.1776	0.442915	0.521577	0.555622	MF22AZ-3-AR	9	unknown	bowl	3.5	4	2	1.875	7.36311	18.5173	21.806	11.0447
MF22AZ-3	902	22	2	13	1.1776	0.442915	0.521577	0.555622	MF22AZ-3-AR	10	unknown	bowl	6	6	3	3	28.2743	54.0664	63.6686	28.2743
MF22AZ-3	902	22	2	13	1.1776	0.442915	0.521577	0.555622	MF22AZ-3-AR	11	unknown	bowl	6.5	5	1	2.875	8.65574	20.7148	24.3937	25.9672
MF22AZ-3	902	22	2	13	1.1776	0.442915	0.521577	0.555622	MF22AZ-3-AR	12	rabbit	bowl	9	7	1.5	4	25.1327	48.7257	57.3794	50.2655
MF22AZ-3	902	22	2	13	1.1776	0.442915	0.521577	0.555622	MF22AZ-3-AR	13	rabbit	scratch	8	5	0.5	3.25	5.53051	15.4019	18.1373	33.1831
MF22AZ-3	902	22	2	13	1.1776	0.442915	0.521577	0.555622	MF22AZ-3-AR	14	rabbit	rabbit	12	6	3	4.5	63.6173	114.149	134.422	63.6173
MF22AZ-3	902	22	2	13	1.1776	0.442915	0.521577	0.555622	MF22AZ-3-AR	15	rabbit	scratch	11	6	1	4.25	18.915	38.1555	44.932	56.745
MF22AZ-3	902	22	2	13	1.1776	0.442915	0.521577	0.555622	MF22AZ-3-AR	16	rabbit	scratch	7	4	1	2.75	7.91943	19.463	22.9197	23.7583
MF22AZ-3	902	22	2	13	1.1776	0.442915	0.521577	0.555622	MF22AZ-3-AR	17	rabbit	rabbit	16	9	4.5	6.25	184.078	318.932	375.575	122.718
MF22AZ-3	902	22	2	13	1.1776	0.442915	0.521577	0.555622	MF22AZ-3-AR	18	rabbit	scratch	7	4	0.5	2.75	3.95972	12.7315	14.9926	23.7583
MF22AZ-3	902	22	2	13	1.1776	0.442915	0.521577	0.555622	MF22AZ-3-AR	19	bettong	nose hole	7	4	4	2.75	31.6777	59.8521	70.4819	23.7583
MF22AZ-3	902	22	2	13	1.1776	0.442915	0.521577	0.555622	MF22AZ-3-AR	20	rabbit	scratch	14	8	1	5.5	31.6777	59.8521	70.4819	95.0332
MF22AZ-3	902	22	2	13	1.1776	0.442915	0.521577	0.555622	MF22AZ-3-AR	21	unknown	scratch	14	8	1	5.5	31.6777	59.8521	70.4819	95.0332
MF22AZ-3	902	22	2	13	1.1776	0.442915	0.521577	0.555622	MF22AZ-3-AR	22	unknown	nose hole	2	2	1	1	1.0472	7.78024	9.16201	3.14159
MF22AZ-3	900	8	1	3	0.998929	0.401493	0.401063	0.623046	MF22AZ-3-BL	1	unknown	root	15	5	3	5	78.5398	139.518	139.368	78.5398
MF22AZ-3	900	8	1	3	0.998929	0.401493	0.401063	0.623046	MF22AZ-3-BL	2	rabbit	scratch	17	9	2	6.5	88.4882	156.43	156.262	132.732
MF22AZ-3	900	8	1	3	0.998929	0.401493	0.401063	0.623046	MF22AZ-3-BL	3	rabbit	bowl	8	5	2	3.25	22.122	43.6075	43.5608	33.1831
MF22AZ-3	900	8	1	3	0.998929	0.401493	0.401063	0.623046	MF22AZ-3-BL	4	unknown	bowl	8	6	2	3.5	25.6563	49.6158	49.5626	38.4845
MF22AZ-3	900	8	1	3	0.998929	0.401493	0.401063	0.623046	MF22AZ-3-BL	5	rabbit	scratch	16	8	1	6	37.6991	70.0885	70.0134	113.097
MF22AZ-3	900	8	1	3	0.998929	0.401493	0.401063	0.623046	MF22AZ-3-BL	6	bettong	nose hole	5	6	3	2.75	23.7583	46.3891	46.3394	23.7583
MF22AZ-3	900	8	1	3	0.998929	0.401493	0.401063	0.623046	MF22AZ-3-BL	7	unknown	bowl	9	6	4	3.75	58.9049	106.138	106.025	44.1786
MF22AZ-3	900	8	1	3	0.998929	0.401493	0.401063	0.623046	MF22AZ-3-BL	8	unknown	bowl	6	5	2.5	2.75	19.7986	39.6576	39.6151	23.7583
MF22AZ-3	901	13	0	6	0.876451	0.442588	0.387906	0.669264	MF22AZ-3-BR	1	unknown	nose hole	4	3	2.5	1.75	8.01761	19.6299	17.2047	9.62113
MF22AZ-3	901	13	0	6	0.876451	0.442588	0.387906	0.669264	MF22AZ-3-BR	2	rabbit	scratch	15	7	0.5	5.5	15.8389	32.9261	28.8581	95.0332
MF22AZ-3	901	13	0	6	0.876451	0.442588	0.387906	0.669264	MF22AZ-3-BR	3	unknown	nose hole	6	6	4	3	37.6991	70.0885	61.4291	28.2743
MF22AZ-3	901	13	0	6	0.876451	0.442588	0.387906	0.669264	MF22AZ-3-BR	4	rabbit	bowl	12	11	2.5	5.75	86.5574	153.148	134.226	103.869
MF22AZ-3	901	13	0	6	0.876451	0.442588	0.387906	0.669264	MF22AZ-3-BR	5	unknown	nose hole	4	3	2	1.75	6.41409	16.9039	14.8155	9.62113
MF22AZ-3	901	13	0	6	0.876451	0.442588	0.387906	0.669264	MF22AZ-3-BR	6	rabbit	rabbit	16	10	5	6.5	221.22	382.075	334.87	132.732
MF22AZ-3	901	13	0	6	0.876451	0.442588	0.387906	0.669264	MF22AZ-3-BR	7	rabbit	bowl	9	7	4	4	67.0206	119.935	105.117	50.2655
MF22AZ-3	901	13	0	6	0.876451	0.442588	0.387906	0.669264	MF22AZ-3-BR	8	unknown	nose hole	8	6	3	3.5	38.4845	71.4237	62.5994	38.4845
MF22AZ-3	901	13	0	6	0.876451	0.442588	0.387906	0.669264	MF22AZ-3-BR	9	unknown	nose hole	5	4	2	2.25	10.6029	24.0249	21.0566	15.9043
MF22AZ-3	901	13	0	6	0.876451	0.442588	0.387906	0.669264	MF22AZ-3-BR	10	rabbit	scratch	12	6	0.5	4.5	10.6029	24.0249	21.0566	63.6173
MF22AZ-3	901	13	0	6	0.876451	0.442588	0.387906	0.669264	MF22AZ-3-BR	11	unknown	nose hole	5	4	2	2.25	10.6029	24.0249	21.0566	15.9043
MF22AZ-3	901	13	0	6	0.876451	0.442588	0.387906	0.669264	MF22AZ-3-BR	12	rabbit	bowl	10	8	4	4.5	84.823	150.199	131.642	63.6173
MF22AZ-3	901	13	0	6	0.876451	0.442588	0.387906	0.669264	MF22AZ-3-BR	13	unknown	scratch	8	4	0.5	3	4.71239	14.0111	12.28	28.2743
MF22AZ-4	1048	10	9	0	1.23306	0.102203	0.126023	0.534694	MF22AZ-4-AL	1	unknown	scratch	6.5	5.5	1	3	9.42478	22.0221	27.1546	28.2743
MF22AZ-4	1048	10	9	0	1.23306	0.102203	0.126023	0.534694	MF22AZ-4-AL	2	bettong	nose hole	3.5	3	2	1.625	5.53051	15.4019	18.9915	8.29577
MF22AZ-4	1048	10	9	0	1.23306	0.102203	0.126023	0.534694	MF22AZ-4-AL	3	bettong	bowl	6	4.5	2	2.625	14.4317	30.5339	37.6502	21.6475
MF22AZ-4	1048	10	9	0	1.23306	0.102203	0.126023	0.534694	MF22AZ-4-AL	4	bettong	bowl	7	6	2.5	3.25	27.6526	53.0094	65.3638	33.1831
MF22AZ-4	1048	10	9	0	1.23306	0.102203	0.126023	0.534694	MF22AZ-4-AL	5	bettong	bowl	8	7	3.5	3.75	51.5418	93.621	115.44	44.1786
MF22AZ-4	1048	10	9	0	1.23306	0.102203	0.126023	0.534694	MF22AZ-4-AL	6	bettong	bowl	6.5	5	3	2.875	25.9672	50.1443	61.831	25.9672
MF22AZ-4	1048	10	9	0	1.23306	0.102203	0.126023	0.534694	MF22AZ-4-AL	7	bettong	nose hole	3.5	3	3.5	1.625	9.6784	22.4533	27.6863	8.29577
MF22AZ-4	1048	10	9	0	1.23306	0.102203	0.126023	0.534694	MF22AZ-4-AL	8	bettong	bowl	7	5	2	3	18.8496	38.0442	46.9109	28.2743
MF22AZ-4	1048	10	9	0	1.23306	0.102203	0.126023	0.534694	MF22AZ-4-AL	9	bettong	nose hole	4.5	3	2.5	1.875	9.20388	21.6466	26.6916	11.0447
MF22AZ-4	1048	10	9	0	1.23306	0.102203	0.126023	0.534694	MF22AZ-4-AL	10	bettong	bowl	5	4	2	2.25	10.6029	24.0249	29.6242	15.9043
MF22AZ-4	1049	9	7	2	1.2088	0.109733	0.132646	0.543847	MF22AZ-4-AR	1	bettong	nose hole	5	4	3	2.25	15.9043	33.0373	39.9357	15.9043
MF22AZ-4	1049	9	7	2	1.2088	0.109733	0.132646	0.543847	MF22AZ-4-AR	2	bettong	nose hole	5	4	2	2.25	10.6029	24.0249	29.0414	15.9043
MF22AZ-4	1049	9	7	2	1.2088	0.109733	0.132646	0.543847	MF22AZ-4-AR	3	bettong	nose hole	3	3	2	1.5	4.71239	14.0111	16.9366	7.06858
MF22AZ-4	1049	9	7	2	1.2088	0.109733	0.132646	0.543847	MF22AZ-4-AR	4	rabbit	rabbit	9	4	2	3.25	22.122	43.6075	52.7129	33.1831
MF22AZ-4	1049	9	7	2	1.2088	0.109733	0.132646	0.543847	MF22AZ-4-AR	5	bettong	nose hole	5	4	3	2.25	15.9043	33.0373	39.9357	15.9043
MF22AZ-4	1049	9	7	2	1.2088	0.109733	0.132646	0.543847	MF22AZ-4-AR	6	bettong	nose hole	4	3	2	1.75	6.41409	16.9039	20.4336	9.62113
MF22AZ-4	1049	9	7	2	1.2088	0.109733	0.132646	0.543847	MF22AZ-4-AR	7	bettong	nose hole	2	2	1	1	1.0472	7.78024	9.40479	3.14159
MF22AZ-4	1049	9	7	2	1.2088	0.109733	0.132646	0.543847	MF22AZ-4-AR	8	rabbit	bowl	5	5	1	2.5	6.54498	17.1265	20.7026	19.635
MF22AZ-4	1049	9	7	2	1.2088	0.109733	0.132646	0.543847	MF22AZ-4-AR	9	bettong	nose hole	6	5	4	2.75	31.6777	59.8521	72.3496	23.7583
MF22AZ-4	1051	12	11	0	1.02965	0.13315	0.137098	0.611453	MF22AZ-4-BL	1	bettong	nose hole	4	3	3	1.75	9.62113	22.3559	23.0188	9.62113
MF22AZ-4	1051	12	11	0	1.02965	0.13315	0.137098	0.611453	MF22AZ-4-BL	2	bettong	nose hole	3	3	2.5	1.5	5.89049	16.0138	16.4887	7.06858
MF22AZ-4	1051	12	11	0	1.02965	0.13315	0.137098	0.611453	MF22AZ-4-BL	3	bettong	nose hole	4	3	2	1.75	6.41409	16.9039	17.4052	9.62113
MF22AZ-4	1051	12	11	0	1.02965	0.13315	0.137098	0.611453	MF22AZ-4-BL	4	bettong	nose hole	5	4	5	2.25	26.5072	51.0622	52.5763	15.9043
MF22AZ-4	1051	12	11	0	1.02965	0.13315	0.137098	0.611453	MF22AZ-4-BL	5	bettong	nose hole	5	4	3	2.25	15.9043	33.0373	34.0169	15.9043
MF22AZ-4	1051	12	11	0	1.02965	0.13315	0.137098	0.611453	MF22AZ-4-BL	6	bettong	nose hole	6	3	3	2.25	15.9043	33.0373	34.0169	15.9043
MF22AZ-4	1051	12	11	0	1.02965	0.13315	0.137098	0.611453	MF22AZ-4-BL	7	bettong	nose hole	6	5	3	2.75	23.7583	46.3891	47.7646	23.7583
MF22AZ-4	1051	12	11	0	1.02965	0.13315	0.137098	0.611453	MF22AZ-4-BL	8	bird	nose hole	2	1.5	3	0.875	2.40528	10.089	10.3881	2.40528
MF22AZ-4	1051	12	11	0	1.02965	0.13315	0.137098	0.611453	MF22AZ-4-BL	9	bettong	nose hole	4	3	3	1.75	9.62113	22.3559	23.0188	9.62113
MF22AZ-4	1051	12	11	0	1.02965	0.13315	0.137098	0.611453	MF22AZ-4-BL	10	bettong	nose hole	5	5	4	2.5	26.1799	50.5059	52.0034	19.635
MF22AZ-4	1051	12	11	0	1.02965	0.13315	0.137098	0.611453	MF22AZ-4-BL	11	bettong	nose hole	6	5	3	2.75	23.7583	46.3891	47.7646	23.7583
MF22AZ-4	1051	12	11	0	1.02965	0.13315	0.137098	0.611453	MF22AZ-4-BL	12	bettong	nose hole	3.5	3	3	1.625	8.29577	20.1028	20.6989	8.29577
MF22AZ-4	1050	1	1	0	1.31172	0.0806923	0.105845	0.505013	MF22AZ-4-BR	1	bettong	root	6	5	4	2.75	31.6777	59.8521	78.5091	23.7583
MF25A-1	827	3	0	0	1.0292	0.532227	0.547769	0.611622	MF25A-1-AL	1	bird	scratch	12	4	0.5	4	8.37758	20.2419	20.833	50.2655
MF25A-1	827	3	0	0	1.0292	0.532227	0.547769	0.611622	MF25A-1-AL	2	bird	scratch	7	4.5	1	2.875	8.65574	20.7148	21.3197	25.9672
MF25A-1	827	3	0	0	1.0292	0.532227	0.547769	0.611622	MF25A-1-AL	3	bird	scratch	2.5	2	1	1.125	1.32536	8.25311	8.49413	3.97608
MF25A-1	826	19	0	0	0.801264	0.644652	0.516537	0.697636	MF25A-1-AR	1	bird	scratch	5	2	1	1.75	3.20704	11.452	9.17605	9.62113
MF25A-1	826	19	0	0	0.801264	0.644652	0.516537	0.697636	MF25A-1-AR	2	bird	scratch	4.5	4	1	2.125	4.72875	14.0389	11.2488	14.1863
MF25A-1	826	19	0	0	0.801264	0.644652	0.516537	0.697636	MF25A-1-AR	3	bird	scratch	6	2	1	2	4.18879	13.1209	10.5133	12.5664
MF25A-1	826	19	0	0	0.801264	0.644652	0.516537	0.697636	MF25A-1-AR	4	bird	scratch	3	2	0.5	1.25	0.818123	7.39081	5.92199	4.90874
MF25A-1	826	19	0	0	0.801264	0.644652	0.516537	0.697636	MF25A-1-AR	5	bird	scratch	4	3	1	1.75	3.20704	11.452	9.17605	9.62113
MF25A-1	826	19	0	0	0.801264	0.644652	0.516537	0.697636	MF25A-1-AR	6	bird	scratch	5	3	1	2	4.18879	13.1209	10.5133	12.5664
MF25A-1	826	19	0	0	0.801264	0.644652	0.516537	0.697636	MF25A-1-AR	7	bird	scratch	12	5	1	4.25	18.915	38.1555	30.5726	56.745
MF25A-1	826	19	0	0	0.801264	0.644652	0.516537	0.697636	MF25A-1-AR	8	bird	scratch	5	2	1	1.75	3.20704	11.452	9.17605	9.62113
MF25A-1	826	19	0	0	0.801264	0.644652	0.516537	0.697636	MF25A-1-AR	9	bird	scratch	8	6	0.5	3.5	6.41409	16.9039	13.5445	38.4845
MF25A-1	826	19	0	0	0.801264	0.644652	0.516537	0.697636	MF25A-1-AR	10	bird	scratch	6.5	2	1	2.125	4.72875	14.0389	11.2488	14.1863
MF25A-1	826	19	0	0	0.801264	0.644652	0.516537	0.697636	MF25A-1-AR	11	bird	scratch	4	4	0.5	2	2.0944	9.56047	7.66046	12.5664
MF25A-1	826	19	0	0	0.801264	0.644652	0.516537	0.697636	MF25A-1-AR	12	bird	scratch	5	4	1.5	2.25	7.95216	19.5187	15.6396	15.9043
MF25A-1	826	19	0	0	0.801264	0.644652	0.516537	0.697636	MF25A-1-AR	13	bird	scratch	10	4	1	3.5	12.8282	27.8079	22.2815	38.4845
MF25A-1	826	19	0	0	0.801264	0.644652	0.516537	0.697636	MF25A-1-AR	14	bird	scratch	9	3	1	3	9.42478	22.0221	17.6455	28.2743
MF25A-1	826	19	0	0	0.801264	0.644652	0.516537	0.697636	MF25A-1-AR	15	bird	scratch	16	6	0.5	5.5	15.8389	32.9261	26.3825	95.0332
MF25A-1	826	19	0	0	0.801264	0.644652	0.516537	0.697636	MF25A-1-AR	16	bird	scratch	7	5	0.5	3	4.71239	14.0111	11.2266	28.2743
MF25A-1	826	19	0	0	0.801264	0.644652	0.516537	0.697636	MF25A-1-AR	17	bird	scratch	5	4	1.5	2.25	7.95216	19.5187	15.6396	15.9043
MF25A-1	826	19	0	0	0.801264	0.644652	0.516537	0.697636	MF25A-1-AR	18	bird	scratch	10	6	1	4	16.7552	34.4838	27.6306	50.2655
MF25A-1	826	19	0	0	0.801264	0.644652	0.516537	0.697636	MF25A-1-AR	19	bird	scratch	12	8	2	5	52.3599	95.0118	76.1295	78.5398
MF25A-1	824	17	0	0	0.862826	0.878346	0.757859	0.674405	MF25A-1-BL	1	bird	scratch	6.5	5.5	0.5	3	4.71239	14.0111	12.0891	28.2743
MF25A-1	824	17	0	0	0.862826	0.878346	0.757859	0.674405	MF25A-1-BL	2	bird	scratch	5	4	1	2.25	5.30144	15.0124	12.9531	15.9043
MF25A-1	824	17	0	0	0.862826	0.878346	0.757859	0.674405	MF25A-1-BL	3	bird	nose hole	2	2	2	1	2.0944	9.56047	8.24902	3.14159
MF25A-1	824	17	0	0	0.862826	0.878346	0.757859	0.674405	MF25A-1-BL	4	bird	nose hole	2	2	1	1	1.0472	7.78024	6.71299	3.14159
MF25A-1	824	17	0	0	0.862826	0.878346	0.757859	0.674405	MF25A-1-BL	5	bird	scratch	3	3	1	1.5	2.35619	10.0055	8.63303	7.06858
MF25A-1	824	17	0	0	0.862826	0.878346	0.757859	0.674405	MF25A-1-BL	6	bird	scratch	5.5	5	1.5	2.625	10.8238	24.4004	21.0533	21.6475
MF25A-1	824	17	0	0	0.862826	0.878346	0.757859	0.674405	MF25A-1-BL	7	bird	nose hole	2.5	2	1.5	1.125	1.98804	9.37967	8.09302	3.97608
MF25A-1	824	17	0	0	0.862826	0.878346	0.757859	0.674405	MF25A-1-BL	8	unknown	scratch	5	3	1	2	4.18879	13.1209	11.3211	12.5664
MF25A-1	824	17	0	0	0.862826	0.878346	0.757859	0.674405	MF25A-1-BL	9	unknown	scratch	10	4.5	1	3.625	13.7608	29.3934	25.3614	41.2825
MF25A-1	824	17	0	0	0.862826	0.878346	0.757859	0.674405	MF25A-1-BL	10	bird	scratch	6	2.5	1	2.125	4.72875	14.0389	12.1131	14.1863
MF25A-1	824	17	0	0	0.862826	0.878346	0.757859	0.674405	MF25A-1-BL	11	bird	scratch	6	4	1	2.5	6.54498	17.1265	14.7772	19.635
MF25A-1	824	17	0	0	0.862826	0.878346	0.757859	0.674405	MF25A-1-BL	12	bird	scratch	7	3	1.5	2.5	9.81748	22.6897	19.5773	19.635
MF25A-1	824	17	0	0	0.862826	0.878346	0.757859	0.674405	MF25A-1-BL	13	bird	nose hole	1.5	1	2	0.625	0.818123	7.39081	6.37698	1.22718
MF25A-1	824	17	0	0	0.862826	0.878346	0.757859	0.674405	MF25A-1-BL	14	bird	scratch	8.5	4	2.5	3.125	25.5663	49.4628	42.6778	30.6796
MF25A-1	824	17	0	0	0.862826	0.878346	0.757859	0.674405	MF25A-1-BL	15	bird	scratch	8	5	0.5	3.25	5.53051	15.4019	13.2891	33.1831
MF25A-1	824	17	0	0	0.862826	0.878346	0.757859	0.674405	MF25A-1-BL	16	bird	scratch	6	4	3	2.5	19.635	39.3794	33.9776	19.635
MF25A-1	824	17	0	0	0.862826	0.878346	0.757859	0.674405	MF25A-1-BL	17	bird	scratch	4	3.5	1	1.875	3.68155	12.2586	10.5771	11.0447
MF25A-1	825	11	0	0	0.983355	0.706285	0.694529	0.628923	MF25A-1-BR	1	bird	nose hole	3	3	2	1.5	4.71239	14.0111	13.7778	7.06858
MF25A-1	825	11	0	0	0.983355	0.706285	0.694529	0.628923	MF25A-1-BR	2	bird	nose hole	4	2	3	1.5	7.06858	18.0166	17.7167	7.06858
MF25A-1	825	11	0	0	0.983355	0.706285	0.694529	0.628923	MF25A-1-BR	3	bird	scratch	5.5	3	1	2.125	4.72875	14.0389	13.8052	14.1863
MF25A-1	825	11	0	0	0.983355	0.706285	0.694529	0.628923	MF25A-1-BR	4	bird	nose hole	3	2	2	1.25	3.27249	11.5632	11.3708	4.90874
MF25A-1	825	11	0	0	0.983355	0.706285	0.694529	0.628923	MF25A-1-BR	5	bird	scratch	4	3	1	1.75	3.20704	11.452	11.2614	9.62113
MF25A-1	825	11	0	0	0.983355	0.706285	0.694529	0.628923	MF25A-1-BR	6	bird	nose hole	1.5	1.5	2	0.75	1.1781	8.00277	7.86956	1.76715
MF25A-1	825	11	0	0	0.983355	0.706285	0.694529	0.628923	MF25A-1-BR	7	bird	nose hole	1.5	2	1.5	0.875	1.20264	8.04449	7.91059	2.40528
MF25A-1	825	11	0	0	0.983355	0.706285	0.694529	0.628923	MF25A-1-BR	8	bird	nose hole	2	2	1	1	1.0472	7.78024	7.65073	3.14159
MF25A-1	825	11	0	0	0.983355	0.706285	0.694529	0.628923	MF25A-1-BR	9	bird	scratch	7	4	2	2.75	15.8389	32.9261	32.378	23.7583
MF25A-1	825	11	0	0	0.983355	0.706285	0.694529	0.628923	MF25A-1-BR	10	bird	scratch	4	4	1	2	4.18879	13.1209	12.9025	12.5664
MF25A-1	825	11	0	0	0.983355	0.706285	0.694529	0.628923	MF25A-1-BR	11	bird	scratch	7	3	0.5	2.5	3.27249	11.5632	11.3708	19.635
MF25A-2	936	5	5	0	0.80433	0.989541	0.795918	0.696479	MF25A-2-AL	1	bettong	cone	2.5	2.5	4.5	1.25	7.36311	18.5173	14.894	4.90874
MF25A-2	936	5	5	0	0.80433	0.989541	0.795918	0.696479	MF25A-2-AL	2	bettong	leaning cone	5	4	3	2.25	15.9043	33.0373	26.5729	15.9043
MF25A-2	936	5	5	0	0.80433	0.989541	0.795918	0.696479	MF25A-2-AL	3	bettong	bowl	4	3	2.5	1.75	8.01761	19.6299	15.7889	9.62113
MF25A-2	936	5	5	0	0.80433	0.989541	0.795918	0.696479	MF25A-2-AL	4	bettong	leaning cone	6	3.5	4	2.375	23.6274	46.1666	37.1332	17.7205
MF25A-2	936	5	5	0	0.80433	0.989541	0.795918	0.696479	MF25A-2-AL	5	bettong	leaning cone	3.5	2.5	2.5	1.5	5.89049	16.0138	12.8804	7.06858
MF25A-2	937	23	11	4	1.35763	0.280289	0.380529	0.487687	MF25A-2-AR	1	bettong	nose hole	2	1	1	0.75	0.589049	7.00138	9.50529	1.76715
MF25A-2	937	23	11	4	1.35763	0.280289	0.380529	0.487687	MF25A-2-AR	2	wallaby	scratch	4	3	1	1.75	3.20704	11.452	15.5475	9.62113
MF25A-2	937	23	11	4	1.35763	0.280289	0.380529	0.487687	MF25A-2-AR	3	wallaby	scratch	2.5	1.5	0.5	1	0.523599	6.89012	9.35423	3.14159
MF25A-2	937	23	11	4	1.35763	0.280289	0.380529	0.487687	MF25A-2-AR	4	wallaby	scratch	6	4	0.5	2.5	3.27249	11.5632	15.6986	19.635
MF25A-2	937	23	11	4	1.35763	0.280289	0.380529	0.487687	MF25A-2-AR	5	wallaby	scratch	9	3.5	1	3.125	10.2265	23.3851	31.7483	30.6796
MF25A-2	937	23	11	4	1.35763	0.280289	0.380529	0.487687	MF25A-2-AR	6	wallaby	scratch	5	3	0.5	2	2.0944	9.56047	12.9796	12.5664
MF25A-2	937	23	11	4	1.35763	0.280289	0.380529	0.487687	MF25A-2-AR	7	wallaby	scratch	8	3	0.5	2.75	3.95972	12.7315	17.2847	23.7583
MF25A-2	937	23	11	4	1.35763	0.280289	0.380529	0.487687	MF25A-2-AR	8	bettong	leaning cone	4.5	3	1	1.875	3.68155	12.2586	16.6427	11.0447
MF25A-2	937	23	11	4	1.35763	0.280289	0.380529	0.487687	MF25A-2-AR	9	wallaby	scratch	5.5	4	0.5	2.375	2.95342	11.0208	14.9622	17.7205
MF25A-2	937	23	11	4	1.35763	0.280289	0.380529	0.487687	MF25A-2-AR	10	wallaby	scratch	8	4	0.5	3	4.71239	14.0111	19.0218	28.2743
MF25A-2	937	23	11	4	1.35763	0.280289	0.380529	0.487687	MF25A-2-AR	11	bettong	leaning cone	3.5	2.5	1	1.5	2.35619	10.0055	13.5838	7.06858
MF25A-2	937	23	11	4	1.35763	0.280289	0.380529	0.487687	MF25A-2-AR	12	bettong	leaning cone	3	2.5	3	1.375	5.93957	16.0973	21.8541	5.93957
MF25A-2	937	23	11	4	1.35763	0.280289	0.380529	0.487687	MF25A-2-AR	13	bettong	leaning cone	3	2.5	4.5	1.375	8.90936	21.1459	28.7083	5.93957
MF25A-2	937	23	11	4	1.35763	0.280289	0.380529	0.487687	MF25A-2-AR	14	bettong	leaning cone	3	2.5	2	1.375	3.95972	12.7315	17.2847	5.93957
MF25A-2	937	23	11	4	1.35763	0.280289	0.380529	0.487687	MF25A-2-AR	15	rabbit	scratch	6	4.5	1	2.625	7.21585	18.2669	24.7997	21.6475
MF25A-2	937	23	11	4	1.35763	0.280289	0.380529	0.487687	MF25A-2-AR	16	bettong	bowl	3	3	1.5	1.5	3.53429	12.0083	16.3028	7.06858
MF25A-2	937	23	11	4	1.35763	0.280289	0.380529	0.487687	MF25A-2-AR	17	bettong	leaning cone	4	3	2.5	1.75	8.01761	19.6299	26.6502	9.62113
MF25A-2	937	23	11	4	1.35763	0.280289	0.380529	0.487687	MF25A-2-AR	18	rabbit	scratch	20	6	0.5	6.5	22.122	43.6075	59.2028	132.732
MF25A-2	937	23	11	4	1.35763	0.280289	0.380529	0.487687	MF25A-2-AR	19	bettong	nose hole	2	1	1	0.75	0.589049	7.00138	9.50529	1.76715
MF25A-2	937	23	11	4	1.35763	0.280289	0.380529	0.487687	MF25A-2-AR	20	rabbit	scratch	6	4	1	2.5	6.54498	17.1265	23.2514	19.635
MF25A-2	937	23	11	4	1.35763	0.280289	0.380529	0.487687	MF25A-2-AR	21	rabbit	rabbit	8	6.5	4	3.625	55.0433	99.5736	135.184	41.2825
MF25A-2	937	23	11	4	1.35763	0.280289	0.380529	0.487687	MF25A-2-AR	22	bettong	leaning cone	3.5	2.5	2	1.5	4.71239	14.0111	19.0218	7.06858
MF25A-2	937	23	11	4	1.35763	0.280289	0.380529	0.487687	MF25A-2-AR	23	bettong	nose hole	2	1	2	0.75	1.1781	8.00277	10.8648	1.76715
MF25A-2	939	15	4	1	1.02383	0.565052	0.578518	0.613649	MF25A-2-BL	1	bettong	leaning cone	3	2	2	1.25	3.27249	11.5632	11.8388	4.90874
MF25A-2	939	15	4	1	1.02383	0.565052	0.578518	0.613649	MF25A-2-BL	2	rabbit	bowl	6	6	3	3	28.2743	54.0664	55.3548	28.2743
MF25A-2	939	15	4	1	1.02383	0.565052	0.578518	0.613649	MF25A-2-BL	3	bird	scratch	21	10	0.5	7.75	31.4487	59.4627	60.8797	188.692
MF25A-2	939	15	4	1	1.02383	0.565052	0.578518	0.613649	MF25A-2-BL	4	bird	scratch	12	7	0.5	4.75	11.8137	26.0833	26.7049	70.8822
MF25A-2	939	15	4	1	1.02383	0.565052	0.578518	0.613649	MF25A-2-BL	5	bird	scratch	9	7	0.5	4	8.37758	20.2419	20.7243	50.2655
MF25A-2	939	15	4	1	1.02383	0.565052	0.578518	0.613649	MF25A-2-BL	6	bird	scratch	10	5	0.5	3.75	7.36311	18.5173	18.9586	44.1786
MF25A-2	939	15	4	1	1.02383	0.565052	0.578518	0.613649	MF25A-2-BL	7	bird	scratch	11	7	0.5	4.5	10.6029	24.0249	24.5974	63.6173
MF25A-2	939	15	4	1	1.02383	0.565052	0.578518	0.613649	MF25A-2-BL	8	bird	scratch	12	6	0.5	4.5	10.6029	24.0249	24.5974	63.6173
MF25A-2	939	15	4	1	1.02383	0.565052	0.578518	0.613649	MF25A-2-BL	9	bird	scratch	8	3	0.8	2.75	6.33555	16.7704	17.1701	23.7583
MF25A-2	939	15	4	1	1.02383	0.565052	0.578518	0.613649	MF25A-2-BL	10	bettong	leaning cone	7	4	4	2.75	31.6777	59.8521	61.2784	23.7583
MF25A-2	939	15	4	1	1.02383	0.565052	0.578518	0.613649	MF25A-2-BL	11	bettong	leaning cone	4	2.5	2.5	1.625	6.91314	17.7523	18.1754	8.29577
MF25A-2	939	15	4	1	1.02383	0.565052	0.578518	0.613649	MF25A-2-BL	12	bird	scratch	8	7	0.5	3.75	7.36311	18.5173	18.9586	44.1786
MF25A-2	939	15	4	1	1.02383	0.565052	0.578518	0.613649	MF25A-2-BL	13	bird	scratch	10	9	0.5	4.75	11.8137	26.0833	26.7049	70.8822
MF25A-2	939	15	4	1	1.02383	0.565052	0.578518	0.613649	MF25A-2-BL	14	bird	scratch	21	20	0.5	10.25	55.0106	99.518	101.89	330.064
MF25A-2	939	15	4	1	1.02383	0.565052	0.578518	0.613649	MF25A-2-BL	15	bettong	leaning cone	4.5	2.5	3	1.75	9.62113	22.3559	22.8887	9.62113
MF25A-3	904	9	0	0	0.927321	0.597901	0.554446	0.650067	MF25A-3-AL	1	bird	nose hole	2	1.5	2	0.875	1.60352	8.72599	8.09179	2.40528
MF25A-3	904	9	0	0	0.927321	0.597901	0.554446	0.650067	MF25A-3-AL	2	bird	nose hole	2.5	2.5	2	1.25	3.27249	11.5632	10.7228	4.90874
MF25A-3	904	9	0	0	0.927321	0.597901	0.554446	0.650067	MF25A-3-AL	3	bird	nose hole	4	3	1.5	1.75	4.81056	14.178	13.1475	9.62113
MF25A-3	904	9	0	0	0.927321	0.597901	0.554446	0.650067	MF25A-3-AL	4	bird	scratch	24	5	1	7.25	55.0433	99.5736	92.3368	165.13
MF25A-3	904	9	0	0	0.927321	0.597901	0.554446	0.650067	MF25A-3-AL	5	bird	scratch	10	6	1.5	4	25.1327	48.7257	45.1843	50.2655
MF25A-3	904	9	0	0	0.927321	0.597901	0.554446	0.650067	MF25A-3-AL	6	bird	nose hole	2	1.5	3	0.875	2.40528	10.089	9.35573	2.40528
MF25A-3	904	9	0	0	0.927321	0.597901	0.554446	0.650067	MF25A-3-AL	7	bird	nose hole	3	2.5	3.5	1.375	6.9295	17.7802	16.4879	5.93957
MF25A-3	904	9	0	0	0.927321	0.597901	0.554446	0.650067	MF25A-3-AL	8	bird	nose hole	2	1.5	2	0.875	1.60352	8.72599	8.09179	2.40528
MF25A-3	904	9	0	0	0.927321	0.597901	0.554446	0.650067	MF25A-3-AL	9	bird	nose hole	3	1.5	2	1.125	2.65072	10.5062	9.74264	3.97608
MF25A-3	905	20	0	0	1.03267	0.458397	0.473375	0.610312	MF25A-3-AR	1	echidna	bowl	11.5	8.5	2.5	5	65.4498	117.265	121.096	78.5398
MF25A-3	905	20	0	0	1.03267	0.458397	0.473375	0.610312	MF25A-3-AR	2	echidna	scratch	13	7.5	2	5.125	55.0106	99.518	102.77	82.5159
MF25A-3	905	20	0	0	1.03267	0.458397	0.473375	0.610312	MF25A-3-AR	3	echidna	scratch	11	4	2	3.75	29.4524	56.0691	57.9011	44.1786
MF25A-3	905	20	0	0	1.03267	0.458397	0.473375	0.610312	MF25A-3-AR	4	echidna	scratch	31	25	1.5	14	307.876	529.389	546.687	615.752
MF25A-3	905	20	0	0	1.03267	0.458397	0.473375	0.610312	MF25A-3-AR	5	echidna	bowl	19	9	3	7	153.938	267.695	276.441	153.938
MF25A-3	905	20	0	0	1.03267	0.458397	0.473375	0.610312	MF25A-3-AR	6	echidna	bowl	11.5	9	1.5	5.125	41.2579	76.1385	78.6263	82.5159
MF25A-3	905	20	0	0	1.03267	0.458397	0.473375	0.610312	MF25A-3-AR	7	echidna	bowl	13	8	2.5	5.25	72.1585	128.669	132.874	86.5901
MF25A-3	905	20	0	0	1.03267	0.458397	0.473375	0.610312	MF25A-3-AR	8	echidna	scratch	14	3.5	1	4.375	20.044	40.0748	41.3842	60.132
MF25A-3	905	20	0	0	1.03267	0.458397	0.473375	0.610312	MF25A-3-AR	9	echidna	bowl	14	10	3	6	113.097	198.265	204.744	113.097
MF25A-3	905	20	0	0	1.03267	0.458397	0.473375	0.610312	MF25A-3-AR	10	echidna	bowl	10	10	3.5	5	91.6298	161.771	167.056	78.5398
MF25A-3	905	20	0	0	1.03267	0.458397	0.473375	0.610312	MF25A-3-AR	11	echidna	bowl	10	9	4	4.75	94.5096	166.666	172.112	70.8822
MF25A-3	905	20	0	0	1.03267	0.458397	0.473375	0.610312	MF25A-3-AR	12	echidna	bowl	16	9	2.5	6.25	102.265	179.851	185.728	122.718
MF25A-3	905	20	0	0	1.03267	0.458397	0.473375	0.610312	MF25A-3-AR	13	bird	nose hole	2	2	2.5	1	2.61799	10.4506	10.7921	3.14159
MF25A-3	905	20	0	0	1.03267	0.458397	0.473375	0.610312	MF25A-3-AR	14	bird	scratch	5	3	2	2	8.37758	20.2419	20.9033	12.5664
MF25A-3	905	20	0	0	1.03267	0.458397	0.473375	0.610312	MF25A-3-AR	15	bird	nose hole	3.5	2.5	3	1.5	7.06858	18.0166	18.6053	7.06858
MF25A-3	905	20	0	0	1.03267	0.458397	0.473375	0.610312	MF25A-3-AR	16	bird	nose hole	2	1	2.5	0.75	1.47262	8.50346	8.7813	1.76715
MF25A-3	905	20	0	0	1.03267	0.458397	0.473375	0.610312	MF25A-3-AR	17	unknown	nose hole	6	5	4.5	2.75	35.6374	66.5837	68.7592	23.7583
MF25A-3	905	20	0	0	1.03267	0.458397	0.473375	0.610312	MF25A-3-AR	18	unknown	bowl	4	4	2	2	8.37758	20.2419	20.9033	12.5664
MF25A-3	905	20	0	0	1.03267	0.458397	0.473375	0.610312	MF25A-3-AR	19	unknown	scratch	15	5	1.5	5	39.2699	72.7588	75.1362	78.5398
MF25A-3	905	20	0	0	1.03267	0.458397	0.473375	0.610312	MF25A-3-AR	20	unknown	scratch	23	11	1.5	8.5	113.49	198.933	205.433	226.98
GO72A-1	1070	1	0	0	1.29425	0.0362826	0.0469588	0.511604	GO72A-1-AR	1	bird	nose hole	4	2	2	1.5	4.71239	14.0111	18.1338	7.06858
GO72A-1	1069	3	0	0	0.934066	0.0706351	0.0659779	0.647522	GO72A-1-BR	1	unknown	bowl	3	3	1	1.5	2.35619	10.0055	9.34583	7.06858
GO72A-1	1069	3	0	0	0.934066	0.0706351	0.0659779	0.647522	GO72A-1-BR	2	unknown	bowl	5	4	2	2.25	10.6029	24.0249	22.4408	15.9043
GO72A-1	1069	3	0	0	0.934066	0.0706351	0.0659779	0.647522	GO72A-1-BR	3	bird	nose hole	3	2	2	1.25	3.27249	11.5632	10.8008	4.90874
GO72A-4	848	2	0	0	1.30725	0.123067	0.16088	0.506697	GO72A-4-AL	1	bird	nose hole	4	3	3	1.75	9.62113	22.3559	29.2249	9.62113
GO72A-4	848	2	0	0	1.30725	0.123067	0.16088	0.506697	GO72A-4-AL	2	bird	nose hole	2	1	4	0.75	2.35619	10.0055	13.0798	1.76715
GO72A-4	849	3	0	0	1.32733	0.197306	0.26189	0.499122	GO72A-4-AR	1	bird	nose hole	5	3	2	2	8.37758	20.2419	26.8676	12.5664
GO72A-4	849	3	0	0	1.32733	0.197306	0.26189	0.499122	GO72A-4-AR	2	bird	nose hole	2	2	1	1	1.0472	7.78024	10.3269	3.14159
GO72A-4	849	3	0	0	1.32733	0.197306	0.26189	0.499122	GO72A-4-AR	3	bird	nose hole	5	2	3	1.75	9.62113	22.3559	29.6736	9.62113
WG76-2	815	2	0	0	1.28173	0.333673	0.427679	0.516327	WG76-2-AL	1	unknown	scratch	7	3	0.5	2.5	3.27249	11.5632	14.821	19.635
WG76-2	815	2	0	0	1.28173	0.333673	0.427679	0.516327	WG76-2-AL	2	kangaroo	scratch	4.5	2	2	1.625	5.53051	15.4019	19.7411	8.29577
WG76-2	814	2	0	0	0.984642	0.344423	0.339133	0.628437	WG76-2-AR	1	unknown	scratch	5	3	1	2	4.18879	13.1209	12.9194	12.5664
WG76-2	814	2	0	0	0.984642	0.344423	0.339133	0.628437	WG76-2-AR	2	unknown	scratch	7	5	1.5	3	14.1372	30.0332	29.5719	28.2743
WG76-2	812	18	0	0	1.45917	0.149099	0.21756	0.44937	WG76-2-BL	2	bird	scratch	3	2	1	1.25	1.63625	8.78162	12.8139	4.90874
WG76-2	812	18	0	0	1.45917	0.149099	0.21756	0.44937	WG76-2-BL	3	bird	scratch	8	4	2	3	18.8496	38.0442	55.513	28.2743
WG76-2	812	18	0	0	1.45917	0.149099	0.21756	0.44937	WG76-2-BL	4	unknown	bowl	8	4	1.5	3	14.1372	30.0332	43.8235	28.2743
WG76-2	812	18	0	0	1.45917	0.149099	0.21756	0.44937	WG76-2-BL	5	bird	scratch	13	7	0	5	0	6	8.75502	78.5398
WG76-2	812	18	0	0	1.45917	0.149099	0.21756	0.44937	WG76-2-BL	6	bird	nose hole	3	2	5	1.25	8.18123	19.9081	29.0493	4.90874
WG76-2	812	18	0	0	1.45917	0.149099	0.21756	0.44937	WG76-2-BL	7	bird	nose hole	3	1.5	1	1.125	1.32536	8.25311	12.0427	3.97608
WG76-2	812	18	0	0	1.45917	0.149099	0.21756	0.44937	WG76-2-BL	8	bird	nose hole	3	2	3	1.25	4.90874	14.3449	20.9316	4.90874
WG76-2	812	18	0	0	1.45917	0.149099	0.21756	0.44937	WG76-2-BL	9	bird	nose hole	3	2	3	1.25	4.90874	14.3449	20.9316	4.90874
WG76-2	812	18	0	0	1.45917	0.149099	0.21756	0.44937	WG76-2-BL	10	bird	scratch	3	3	1	1.5	2.35619	10.0055	14.5998	7.06858
WG76-2	812	18	0	0	1.45917	0.149099	0.21756	0.44937	WG76-2-BL	11	bird	scratch	10	9	1	4.75	23.6274	46.1666	67.3649	70.8822
WG76-2	812	18	0	0	1.45917	0.149099	0.21756	0.44937	WG76-2-BL	12	bird	scratch	9	5	0	3.5	0	6	8.75502	38.4845
WG76-2	812	18	0	0	1.45917	0.149099	0.21756	0.44937	WG76-2-BL	13	kangaroo	scratch	10	8	0.5	4.5	10.6029	24.0249	35.0564	63.6173
WG76-2	812	18	0	0	1.45917	0.149099	0.21756	0.44937	WG76-2-BL	14	kangaroo	scratch	7	5	0.5	3	4.71239	14.0111	20.4445	28.2743
WG76-2	812	18	0	0	1.45917	0.149099	0.21756	0.44937	WG76-2-BL	15	unknown	scratch	8	5	0.5	3.25	5.53051	15.4019	22.4739	33.1831
WG76-2	812	18	0	0	1.45917	0.149099	0.21756	0.44937	WG76-2-BL	16	bird	scratch	10	6	5	4	83.7758	148.419	216.568	50.2655
WG76-2	812	18	0	0	1.45917	0.149099	0.21756	0.44937	WG76-2-BL	17	unknown	scratch	8	5	1	3.25	11.061	24.8037	36.1929	33.1831
WG76-2	812	18	0	0	1.45917	0.149099	0.21756	0.44937	WG76-2-BL	18	unknown	scratch	8	5	1	3.25	11.061	24.8037	36.1929	33.1831
WG76-2	812	18	0	0	1.45917	0.149099	0.21756	0.44937	WG76-2-BL	1	bird	nose hole	4	2	2	1.5	4.71239	14.0111	20.4445	7.06858
MF25A-3	907	26	0	0	1.01732	0.468865	0.476986	0.616105	MF25A-3-BL	1	unknown	nose hole	3	2	2.5	1.25	4.09062	12.954	13.1784	4.90874
MF25A-3	907	26	0	0	1.01732	0.468865	0.476986	0.616105	MF25A-3-BL	2	unknown	gouge	13	3	0.5	4	8.37758	20.2419	20.5925	50.2655
MF25A-3	907	26	0	0	1.01732	0.468865	0.476986	0.616105	MF25A-3-BL	3	unknown	nose hole	6	3	1.5	2.25	7.95216	19.5187	19.8568	15.9043
MF25A-3	907	26	0	0	1.01732	0.468865	0.476986	0.616105	MF25A-3-BL	4	bird	nose hole	2	2.5	2	1.125	2.65072	10.5062	10.6882	3.97608
MF25A-3	907	26	0	0	1.01732	0.468865	0.476986	0.616105	MF25A-3-BL	5	bird	nose hole	3.5	2	2	1.375	3.95972	12.7315	12.9521	5.93957
MF25A-3	907	26	0	0	1.01732	0.468865	0.476986	0.616105	MF25A-3-BL	6	unknown	gouge	11	2.5	3.5	3.375	41.7488	76.973	78.3063	35.7847
MF25A-3	907	26	0	0	1.01732	0.468865	0.476986	0.616105	MF25A-3-BL	7	bird	nose hole	3	2	2	1.25	3.27249	11.5632	11.7635	4.90874
MF25A-3	907	26	0	0	1.01732	0.468865	0.476986	0.616105	MF25A-3-BL	8	bird	nose hole	1.5	1	1	0.625	0.409062	6.6954	6.81138	1.22718
MF25A-3	907	26	0	0	1.01732	0.468865	0.476986	0.616105	MF25A-3-BL	9	bird	nose hole	2	1.5	2	0.875	1.60352	8.72599	8.87714	2.40528
MF25A-3	907	26	0	0	1.01732	0.468865	0.476986	0.616105	MF25A-3-BL	10	unknown	gouge	9	2	2.5	2.75	19.7986	39.6576	40.3445	23.7583
MF25A-3	907	26	0	0	1.01732	0.468865	0.476986	0.616105	MF25A-3-BL	11	unknown	bowl	2	2	1.5	1	1.5708	8.67035	8.82054	3.14159
MF25A-3	907	26	0	0	1.01732	0.468865	0.476986	0.616105	MF25A-3-BL	12	bird	gouge	8	3	3.5	2.75	27.718	53.1206	54.0408	23.7583
MF25A-3	907	26	0	0	1.01732	0.468865	0.476986	0.616105	MF25A-3-BL	13	bird	nose hole	3	2.5	3.5	1.375	6.9295	17.7802	18.0881	5.93957
MF25A-3	907	26	0	0	1.01732	0.468865	0.476986	0.616105	MF25A-3-BL	14	unknown	nose hole	3.5	2.5	1	1.5	2.35619	10.0055	10.1788	7.06858
MF25A-3	907	26	0	0	1.01732	0.468865	0.476986	0.616105	MF25A-3-BL	15	echidna	nose hole	6	4	4	2.5	26.1799	50.5059	51.3808	19.635
MF25A-3	907	26	0	0	1.01732	0.468865	0.476986	0.616105	MF25A-3-BL	16	bird	scratch	3.5	1.5	0.5	1.25	0.818123	7.39081	7.51883	4.90874
MF25A-3	907	26	0	0	1.01732	0.468865	0.476986	0.616105	MF25A-3-BL	17	bird	bowl	5	3.5	2.5	2.125	11.8219	26.0972	26.5492	14.1863
MF25A-3	907	26	0	0	1.01732	0.468865	0.476986	0.616105	MF25A-3-BL	18	bird	nose hole	2	1.5	1	0.875	0.801761	7.36299	7.49053	2.40528
MF25A-3	907	26	0	0	1.01732	0.468865	0.476986	0.616105	MF25A-3-BL	19	bird	nose hole	2.5	2	1.5	1.125	1.98804	9.37967	9.54214	3.97608
MF25A-3	907	26	0	0	1.01732	0.468865	0.476986	0.616105	MF25A-3-BL	20	bird	nose hole	1.5	0.5	1.5	0.5	0.392699	6.66759	6.78308	0.785398
MF25A-3	907	26	0	0	1.01732	0.468865	0.476986	0.616105	MF25A-3-BL	21	bird	nose hole	2.5	2	1.5	1.125	1.98804	9.37967	9.54214	3.97608
MF25A-3	907	26	0	0	1.01732	0.468865	0.476986	0.616105	MF25A-3-BL	22	bird	nose hole	2	1	1.5	0.75	0.883573	7.50207	7.63202	1.76715
MF25A-3	907	26	0	0	1.01732	0.468865	0.476986	0.616105	MF25A-3-BL	23	bird	nose hole	2	1	1.5	0.75	0.883573	7.50207	7.63202	1.76715
MF25A-3	907	26	0	0	1.01732	0.468865	0.476986	0.616105	MF25A-3-BL	24	bird	nose hole	2	1	1	0.75	0.589049	7.00138	7.12266	1.76715
MF25A-3	907	26	0	0	1.01732	0.468865	0.476986	0.616105	MF25A-3-BL	25	bird	nose hole	2.5	2	2	1.125	2.65072	10.5062	10.6882	3.97608
MF25A-3	907	26	0	0	1.01732	0.468865	0.476986	0.616105	MF25A-3-BL	26	bird	nose hole	1.5	1	2	0.625	0.818123	7.39081	7.51883	1.22718
MF25A-3	906	24	0	0	1.25816	0.330783	0.416177	0.525223	MF25A-3-BR	1	unknown	nose hole	3	3	2.5	1.5	5.89049	16.0138	20.1479	7.06858
MF25A-3	906	24	0	0	1.25816	0.330783	0.416177	0.525223	MF25A-3-BR	2	unknown	nose hole	3	1	1	1	1.0472	7.78024	9.78877	3.14159
MF25A-3	906	24	0	0	1.25816	0.330783	0.416177	0.525223	MF25A-3-BR	3	echidna	scratch	14.5	12	2.5	6.625	114.905	201.339	253.316	137.886
MF25A-3	906	24	0	0	1.25816	0.330783	0.416177	0.525223	MF25A-3-BR	4	echidna	nose hole	4.5	4	3.5	2.125	16.5506	34.1361	42.9486	14.1863
MF25A-3	906	24	0	0	1.25816	0.330783	0.416177	0.525223	MF25A-3-BR	5	echidna	root	3	3	3	1.5	7.06858	18.0166	22.6677	7.06858
MF25A-3	906	24	0	0	1.25816	0.330783	0.416177	0.525223	MF25A-3-BR	6	echidna	bowl	8	7	3.5	3.75	51.5418	93.621	117.79	44.1786
MF25A-3	906	24	0	0	1.25816	0.330783	0.416177	0.525223	MF25A-3-BR	7	unknown	gouge	7	3	2.5	2.5	16.3625	33.8162	42.5461	19.635
MF25A-3	906	24	0	0	1.25816	0.330783	0.416177	0.525223	MF25A-3-BR	8	echidna	nose hole	5	3	6	2	25.1327	48.7257	61.3046	12.5664
MF25A-3	906	24	0	0	1.25816	0.330783	0.416177	0.525223	MF25A-3-BR	9	echidna	nose hole	5	5	6	2.5	39.2699	72.7588	91.5421	19.635
MF25A-3	906	24	0	0	1.25816	0.330783	0.416177	0.525223	MF25A-3-BR	10	echidna	bowl	12.5	10.5	6	5.75	207.738	359.154	451.873	103.869
MF25A-3	906	24	0	0	1.25816	0.330783	0.416177	0.525223	MF25A-3-BR	11	echidna	scratch	13	10	1.5	5.75	51.9345	94.2886	118.63	103.869
MF25A-3	906	24	0	0	1.25816	0.330783	0.416177	0.525223	MF25A-3-BR	12	echidna	nose hole	3	2.5	4	1.375	7.91943	19.463	24.4876	5.93957
MF25A-3	906	24	0	0	1.25816	0.330783	0.416177	0.525223	MF25A-3-BR	13	bird	nose hole	4	2	2.5	1.5	5.89049	16.0138	20.1479	7.06858
MF25A-3	906	24	0	0	1.25816	0.330783	0.416177	0.525223	MF25A-3-BR	14	echidna	nose hole	5	2	2	1.75	6.41409	16.9039	21.2678	9.62113
MF25A-3	906	24	0	0	1.25816	0.330783	0.416177	0.525223	MF25A-3-BR	15	bird	nose hole	3	2	2	1.25	3.27249	11.5632	14.5484	4.90874
MF25A-3	906	24	0	0	1.25816	0.330783	0.416177	0.525223	MF25A-3-BR	16	bird	nose hole	2	1.5	2	0.875	1.60352	8.72599	10.9787	2.40528
MF25A-3	906	24	0	0	1.25816	0.330783	0.416177	0.525223	MF25A-3-BR	17	echidna	scratch	16	12	2.5	7	128.282	224.079	281.927	153.938
MF25A-3	906	24	0	0	1.25816	0.330783	0.416177	0.525223	MF25A-3-BR	18	bird	nose hole	4	2	5	1.5	11.781	26.0277	32.7469	7.06858
MF25A-3	906	24	0	0	1.25816	0.330783	0.416177	0.525223	MF25A-3-BR	19	unknown	bowl	6	5	5.5	2.75	43.5569	80.0467	100.711	23.7583
MF25A-3	906	24	0	0	1.25816	0.330783	0.416177	0.525223	MF25A-3-BR	20	echidna	scratch	23	22	1	11.25	132.536	231.311	291.026	397.608
MF25A-3	906	24	0	0	1.25816	0.330783	0.416177	0.525223	MF25A-3-BR	21	bird	nose hole	3	2	1.5	1.25	2.45437	10.1724	12.7985	4.90874
MF25A-3	906	24	0	0	1.25816	0.330783	0.416177	0.525223	MF25A-3-BR	22	bird	gouge	4	1	1.5	1.25	2.45437	10.1724	12.7985	4.90874
MF25A-3	906	24	0	0	1.25816	0.330783	0.416177	0.525223	MF25A-3-BR	23	echidna	nose hole	5	4.5	7	2.375	41.3479	76.2915	95.9868	17.7205
MF25A-3	906	24	0	0	1.25816	0.330783	0.416177	0.525223	MF25A-3-BR	24	unknown	scratch	24	16	1	10	104.72	184.024	231.531	314.159
MF25A-4	1039	15	14	0	1.15388	0.0287216	0.0331412	0.564575	MF25A-4-AL	1	bettong	nose hole	2.5	2	1.5	1.125	1.98804	9.37967	10.823	3.97608
MF25A-4	1039	15	14	0	1.15388	0.0287216	0.0331412	0.564575	MF25A-4-AL	2	unknown	scratch	2.5	2.5	0.5	1.25	0.818123	7.39081	8.52808	4.90874
MF25A-4	1039	15	14	0	1.15388	0.0287216	0.0331412	0.564575	MF25A-4-AL	3	bettong	leaning cone	3	3	3	1.5	7.06858	18.0166	20.7889	7.06858
MF25A-4	1039	15	14	0	1.15388	0.0287216	0.0331412	0.564575	MF25A-4-AL	4	bettong	bowl	5	3	2.5	2	10.472	23.8024	27.465	12.5664
MF25A-4	1039	15	14	0	1.15388	0.0287216	0.0331412	0.564575	MF25A-4-AL	5	bettong	nose hole	3.5	2.5	3	1.5	7.06858	18.0166	20.7889	7.06858
MF25A-4	1039	15	14	0	1.15388	0.0287216	0.0331412	0.564575	MF25A-4-AL	6	bettong	rabbit	4	3.5	2	1.875	7.36311	18.5173	21.3667	11.0447
MF25A-4	1039	15	14	0	1.15388	0.0287216	0.0331412	0.564575	MF25A-4-AL	7	bettong	leaning cone	5	3	2	2	8.37758	20.2419	23.3566	12.5664
MF25A-4	1039	15	14	0	1.15388	0.0287216	0.0331412	0.564575	MF25A-4-AL	8	bettong	bowl	6	5	3	2.75	23.7583	46.3891	53.5273	23.7583
MF25A-4	1039	15	14	0	1.15388	0.0287216	0.0331412	0.564575	MF25A-4-AL	9	bettong	rabbit	7	4.5	4	2.875	34.623	64.859	74.8394	25.9672
MF25A-4	1039	15	14	0	1.15388	0.0287216	0.0331412	0.564575	MF25A-4-AL	10	bettong	rabbit	5	4	2	2.25	10.6029	24.0249	27.7218	15.9043
MF25A-4	1039	15	14	0	1.15388	0.0287216	0.0331412	0.564575	MF25A-4-AL	11	bettong	rabbit	4	3	2	1.75	6.41409	16.9039	19.5051	9.62113
MF25A-4	1039	15	14	0	1.15388	0.0287216	0.0331412	0.564575	MF25A-4-AL	12	bettong	cone	2.5	2.5	2	1.25	3.27249	11.5632	13.3426	4.90874
MF25A-4	1039	15	14	0	1.15388	0.0287216	0.0331412	0.564575	MF25A-4-AL	13	bettong	bowl	5	4	3	2.25	15.9043	33.0373	38.121	15.9043
MF25A-4	1039	15	14	0	1.15388	0.0287216	0.0331412	0.564575	MF25A-4-AL	14	bettong	rabbit	5.5	4	2	2.375	11.8137	26.0833	30.0969	17.7205
MF25A-4	1039	15	14	0	1.15388	0.0287216	0.0331412	0.564575	MF25A-4-AL	15	bettong	scratch	4	3	1	1.75	3.20704	11.452	13.2142	9.62113
MF25A-4	1038	3	1	1	1.35656	0.0302496	0.0410354	0.488091	MF25A-4-AR	1	unknown	leaning cone	3.5	3.5	1	1.75	3.20704	11.452	15.5353	9.62113
MF25A-4	1038	3	1	1	1.35656	0.0302496	0.0410354	0.488091	MF25A-4-AR	2	rabbit	scratch	27	22	3	12.25	471.435	807.44	1095.34	471.435
MF25A-4	1038	3	1	1	1.35656	0.0302496	0.0410354	0.488091	MF25A-4-AR	3	bettong	leaning cone	6	2.5	4	2.125	18.915	38.1555	51.7602	14.1863
MF25A-4	1036	2	0	0	1.16271	0.119096	0.138474	0.561241	MF25A-4-BL	1	unknown	bowl	9	8	4	4.25	75.66	134.622	156.527	56.745
MF25A-4	1036	2	0	0	1.16271	0.119096	0.138474	0.561241	MF25A-4-BL	2	unknown	bowl	14	10	3	6	113.097	198.265	230.525	113.097
MF25A-4	1037	11	11	0	1.1459	0.14622	0.167554	0.567585	MF25A-4-BR	1	bettong	bowl	3.5	3.5	2.5	1.75	8.01761	19.6299	22.494	9.62113
MF25A-4	1037	11	11	0	1.1459	0.14622	0.167554	0.567585	MF25A-4-BR	2	bettong	leaning cone	4	3	1.5	1.75	4.81056	14.178	16.2465	9.62113
MF25A-4	1037	11	11	0	1.1459	0.14622	0.167554	0.567585	MF25A-4-BR	3	bettong	bowl	4.5	4	1.5	2.125	7.09313	18.0583	20.693	14.1863
MF25A-4	1037	11	11	0	1.1459	0.14622	0.167554	0.567585	MF25A-4-BR	4	bettong	leaning cone	4	3	2	1.75	6.41409	16.9039	19.3702	9.62113
MF25A-4	1037	11	11	0	1.1459	0.14622	0.167554	0.567585	MF25A-4-BR	5	bettong	rabbit	3.5	2	2	1.375	3.95972	12.7315	14.5891	5.93957
MF25A-4	1037	11	11	0	1.1459	0.14622	0.167554	0.567585	MF25A-4-BR	6	bettong	leaning cone	4	3	1.5	1.75	4.81056	14.178	16.2465	9.62113
MF25A-4	1037	11	11	0	1.1459	0.14622	0.167554	0.567585	MF25A-4-BR	7	bettong	leaning cone	4.5	3.5	2	2	8.37758	20.2419	23.1952	12.5664
MF25A-4	1037	11	11	0	1.1459	0.14622	0.167554	0.567585	MF25A-4-BR	8	bettong	leaning cone	4.5	4	4	2.125	18.915	38.1555	43.7224	14.1863
[truncated: 767 more rows]

## Sheet: digs per spp
Reserve	Site number	bettong exclusion	Number of days	Site plot code	Number of new digs	Count bettong digs	Count rabbit digs	Count bird digs	Count echidna
MF	MF9A-1	outside exclusion pen	14	MF9A-1-AL	25	23	0	0	0
MF	MF9A-1	outside exclusion pen	14	MF9A-1-AR	18	0	8	4	0
MF	MF9A-1	outside exclusion pen	14	MF9A-1-BL	6	0	3	0	0
MF	MF9A-1	outside exclusion pen	14	MF9A-1-BR	9	4	3	0	0
MF	MF25A-2	outside exclusion pen	12	MF25A-2-BR	7	2	3	2	0
MF	MF9A-3	outside exclusion pen	14	MF9A-3-BL	81	62	16	0	0
MF	MF9A-3	outside exclusion pen	14	MF9A-3-BR	31	30	0	0	0
MF	MF9A-3	outside exclusion pen	14	MF9A-3-AR	54	40	8	0	0
MF	MF9A-3	outside exclusion pen	14	MF9A-3-AL	51	39	2	0	0
MF	MF11A-3	inside exclusion pen	14	MF11A-3-AL	0	0	0	0	0
MF	MF11A-3	inside exclusion pen	14	MF11A-3-AR	0	0	0	0	0
MF	MF11A-3	inside exclusion pen	14	MF11A-3-BR	0	0	0	0	0
MF	MF11A-3	inside exclusion pen	14	MF11A-3-BL	0	0	0	0	0
MF	MF9A-4	outside exclusion pen	14	MF9A-4-AL	24	22	2	0	0
MF	MF9A-4	outside exclusion pen	14	MF9A-4-AR	16	13	1	0	0
MF	MF9A-4	outside exclusion pen	14	MF9A-4-BL	29	13	2	1	0
MF	MF9A-4	outside exclusion pen	14	MF9A-4-BR	47	34	0	1	0
MF	MF11A-2	outside exclusion pen	14	MF11A-2-AL	10	9	0	0	0
MF	MF11A-2	outside exclusion pen	14	MF11A-2-AR	3	2	0	0	0
MF	MF11A-2	outside exclusion pen	14	MF11A-2-BL	8	6	0	0	0
MF	MF11A-2	outside exclusion pen	14	MF11A-2-BR	0	0	0	0	0
MF	MF9A-2	inside exclusion pen	14	MF9A-2-AL	1	0	0	0	1
MF	MF9A-2	inside exclusion pen	14	MF9A-2-AR	2	0	0	2	0
MF	MF9A-2	inside exclusion pen	14	MF9A-2-BL	0	0	0	0	0
MF	MF9A-2	inside exclusion pen	14	MF9A-2-BR	0	0	0	0	0
MF	MF11A-1	outside exclusion pen	14	MF11A-1-AL	84	84	0	0	0
MF	MF11A-1	outside exclusion pen	14	MF11A-1-AR	168	166	0	0	0
MF	MF11A-1	outside exclusion pen	14	MF11A-1-BL	48	45	0	0	0
MF	MF11A-1	outside exclusion pen	14	MF11A-1-BR	2	1	0	0	0
MF	MF16A-1	outside exclusion pen	14	MF16A-1-AL	5	0	5	0	0
MF	MF16A-1	outside exclusion pen	14	MF16A-1-AR	102	93	8	0	0
MF	MF16A-1	outside exclusion pen	14	MF16A-1-BL	16	6	0	8	0
MF	MF16A-1	outside exclusion pen	14	MF16A-1-BR	54	39	14	0	0
MF	MF16A-2	outside exclusion pen	14	MF16A-2-AL	2	0	0	0	0
MF	MF16A-2	outside exclusion pen	14	MF16A-2-AR	43	33	0	2	0
MF	MF16A-2	outside exclusion pen	14	MF16A-2-BL	4	0	1	0	0
MF	MF16A-2	outside exclusion pen	14	MF16A-2-BR	13	5	1	7	0
MF	MF11A-4	outside exclusion pen	14	MF11A-4-AL	10	3	0	5	0
MF	MF11A-4	outside exclusion pen	14	MF11A-4-AR	20	16	0	0	0
MF	MF11A-4	outside exclusion pen	14	MF11A-4-BL	18	10	2	1	0
MF	MF11A-4	outside exclusion pen	14	MF11A-4-BR	4	4	0	0	0
MF	MF16A-4	inside exclusion pen	14	MF16A-4-AL	0	0	0	0	0
MF	MF16A-4	inside exclusion pen	14	MF16A-4-AR	0	0	0	0	0
MF	MF16A-4	inside exclusion pen	14	MF16A-4-BL	0	0	0	0	0
MF	MF16A-4	inside exclusion pen	14	MF16A-4-BR	4	0	2	0	0
MF	MF19A-1	outside exclusion pen	14	MF19A-1-AL	7	2	5	0	0
MF	MF19A-1	outside exclusion pen	14	MF19A-1-AR	9	7	1	0	0
MF	MF19A-1	outside exclusion pen	14	MF19A-1-BL	19	10	8	0	0
MF	MF19A-1	outside exclusion pen	14	MF19A-1-BR	23	6	2	3	0
MF	MF19A-2	outside exclusion pen	14	MF19A-2-AL	8	3	0	0	0
MF	MF19A-2	outside exclusion pen	14	MF19A-2-AR	3	0	0	0	0
MF	MF19A-2	outside exclusion pen	14	MF19A-2-BL	5	1	0	0	0
MF	MF19A-2	outside exclusion pen	14	MF19A-2-BR	40	32	1	0	0
MF	MF19A-3	inside exclusion pen	14	MF19A-3-AL	0	0	0	0	0
MF	MF19A-3	inside exclusion pen	14	MF19A-3-AR	5	0	0	0	0
MF	MF19A-3	inside exclusion pen	14	MF19A-3-BL	4	0	1	0	0
MF	MF19A-3	inside exclusion pen	14	MF19A-3-BR	6	0	0	0	0
MF	MF19A-4	outside exclusion pen	13	MF19A-4-AL	9	0	0	0	0
MF	MF19A-4	outside exclusion pen	13	MF19A-4-AR	20	0	9	1	0
MF	MF19A-4	outside exclusion pen	13	MF19A-4-BL	30	1	0	28	0
MF	MF19A-4	outside exclusion pen	13	MF19A-4-BR	3	0	0	0	0
MF	MF22A-1	outside exclusion pen	14	MF22A-1-AL	8	8	0	0	0
MF	MF22A-1	outside exclusion pen	14	MF22A-1-AR	12	10	0	0	0
MF	MF22A-1	outside exclusion pen	14	MF22A-1-BL	4	3	0	0	0
MF	MF22A-1	outside exclusion pen	14	MF22A-1-BR	3	1	0	0	0
MF	MF22A-2	outside exclusion pen	14	MF22A-2-AL	38	35	0	0	0
MF	MF22A-2	outside exclusion pen	14	MF22A-2-AR	35	11	21	0	1
MF	MF22A-2	outside exclusion pen	14	MF22A-2-BL	19	3	0	2	0
MF	MF22A-2	outside exclusion pen	14	MF22A-2-BR	9	5	2	0	0
MF	MF22A-3	inside exclusion pen	14	MF22A-3-AL	3	0	0	0	0
MF	MF22A-3	inside exclusion pen	14	MF22A-3-AR	4	0	0	0	1
MF	MF22A-3	inside exclusion pen	14	MF22A-3-BL	10	0	0	0	9
MF	MF22A-3	inside exclusion pen	14	MF22A-3-BR	3	0	0	0	2
MF	MF22A-4	outside exclusion pen	12	MF22A-4-BL	7	3	2	2	0
MF	MF22A-4	outside exclusion pen	12	MF22A-4-BR	2	1	1	0	0
MF	MF22A-4	outside exclusion pen	12	MF22A-4-AR	22	2	19	0	0
MF	MF22A-4	outside exclusion pen	12	MF22A-4-AL	4	0	4	0	0
MF	MF16A-3	outside exclusion pen	14	MF16A-3-AL	88	32	46	4	0
MF	MF16A-3	outside exclusion pen	14	MF16A-3-AR	25	18	5	2	0
MF	MF16A-3	outside exclusion pen	14	MF16A-3-BL	2	0	2	0	0
MF	MF16A-3	outside exclusion pen	14	MF16A-3-BR	17	7	9	0	1
MF	MF22AZ-1	outside exclusion pen	14	MF22AZ-1-AL	5	0	0	5	0
MF	MF22AZ-1	outside exclusion pen	14	MF22AZ-1-AR	7	1	3	3	0
MF	MF22AZ-1	outside exclusion pen	14	MF22AZ-1-BL	2	1	0	0	0
MF	MF22AZ-1	outside exclusion pen	14	MF22AZ-1-BR	2	0	0	0	0
MF	MF22AZ-2	inside exclusion pen	13	MF22AZ-2-AL	0	0	0	0	0
MF	MF22AZ-2	inside exclusion pen	13	MF22AZ-2-AR	8	0	8	0	0
MF	MF22AZ-2	inside exclusion pen	13	MF22AZ-2-BL	3	0	3	0	0
MF	MF22AZ-2	inside exclusion pen	13	MF22AZ-2-BR	6	0	5	1	0
MF	MF22AZ-3	outside exclusion pen	14	MF22AZ-3-AL	9	0	0	3	0
MF	MF22AZ-3	outside exclusion pen	14	MF22AZ-3-AR	22	2	13	2	0
MF	MF22AZ-3	outside exclusion pen	14	MF22AZ-3-BL	8	1	3	0	0
MF	MF22AZ-3	outside exclusion pen	14	MF22AZ-3-BR	13	0	6	0	0
MF	MF22AZ-4	outside exclusion pen	14	MF22AZ-4-AL	10	9	0	0	0
MF	MF22AZ-4	outside exclusion pen	14	MF22AZ-4-AR	9	7	2	0	0
MF	MF22AZ-4	outside exclusion pen	14	MF22AZ-4-BL	12	11	0	1	0
MF	MF22AZ-4	outside exclusion pen	14	MF22AZ-4-BR	1	1	0	0	0
MF	MF25A-1	inside exclusion pen	14	MF25A-1-AL	3	0	0	3	0
MF	MF25A-1	inside exclusion pen	14	MF25A-1-AR	19	0	0	19	0
MF	MF25A-1	inside exclusion pen	14	MF25A-1-BL	17	0	0	15	0
MF	MF25A-1	inside exclusion pen	14	MF25A-1-BR	11	0	0	11	0
MF	MF25A-2	outside exclusion pen	12	MF25A-2-AL	5	5	0	0	0
MF	MF25A-2	outside exclusion pen	12	MF25A-2-AR	23	11	4	0	0
MF	MF25A-2	outside exclusion pen	12	MF25A-2-BL	15	4	1	10	0
MF	MF25A-3	outside exclusion pen	14	MF25A-3-AL	9	0	0	9	0
MF	MF25A-3	outside exclusion pen	14	MF25A-3-AR	20	0	0	4	12
MF	MF25A-3	outside exclusion pen	14	MF25A-3-BL	26	0	0	18	1
MF	MF25A-3	outside exclusion pen	14	MF25A-3-BR	24	0	0	6	13
MF	MF25A-4	outside exclusion pen	13	MF25A-4-AL	15	14	0	0	0
MF	MF25A-4	outside exclusion pen	13	MF25A-4-AR	3	1	1	0	0
MF	MF25A-4	outside exclusion pen	13	MF25A-4-BL	2	0	0	0	0
MF	MF25A-4	outside exclusion pen	13	MF25A-4-BR	11	11	0	0	0
MF	MF27A-1	outside exclusion pen	14	MF27A-1-AL	0	0	0	0	0
MF	MF27A-1	outside exclusion pen	14	MF27A-1-AR	0	0	0	0	0
MF	MF27A-1	outside exclusion pen	14	MF27A-1-BL	0	0	0	0	0
MF	MF27A-1	outside exclusion pen	14	MF27A-1-BR	1	0	0	0	0
MF	MF27A-2	outside exclusion pen	14	MF27A-2-AL	6	5	0	0	0
MF	MF27A-2	outside exclusion pen	14	MF27A-2-AR	11	9	0	1	0
MF	MF27A-2	outside exclusion pen	14	MF27A-2-BL	8	0	0	8	0
MF	MF27A-2	outside exclusion pen	14	MF27A-2-BR	3	2	0	0	0
MF	MF27A-3	outside exclusion pen	14	MF27A-3-AL	2	2	0	0	0
MF	MF27A-3	outside exclusion pen	14	MF27A-3-AR	5	0	3	0	0
MF	MF27A-3	outside exclusion pen	14	MF27A-3-BL	0	0	0	0	0
MF	MF27A-3	outside exclusion pen	14	MF27A-3-BR	1	0	1	0	0
MF	MF27A-4	inside exclusion pen	13	MF27A-4-AL	0	0	0	0	0
MF	MF27A-4	inside exclusion pen	13	MF27A-4-AR	5	0	1	0	0
MF	MF27A-4	inside exclusion pen	13	MF27A-4-BL	0	0	0	0	0
MF	MF27A-4	inside exclusion pen	13	MF27A-4-BR	0	0	0	0	0
MF	MF32-1	outside exclusion pen	14	MF32-1-AL	15	1	9	1	0
MF	MF32-1	outside exclusion pen	14	MF32-1-AR	30	30	0	0	0
MF	MF32-1	outside exclusion pen	14	MF32-1-BL	6	5	1	0	0
MF	MF32-1	outside exclusion pen	14	MF32-1-BR	19	5	8	2	0
MF	MF32-2	inside exclusion pen	15	MF32-2-AL	32	0	0	32	0
MF	MF32-2	inside exclusion pen	15	MF32-2-AR	2	0	0	2	0
MF	MF32-2	inside exclusion pen	15	MF32-2-BL	0	0	0	0	0
MF	MF32-2	inside exclusion pen	15	MF32-2-BR	6	0	0	6	0
MF	MF32-3	outside exclusion pen	14	MF32-3-AL	13	9	1	3	0
MF	MF32-3	outside exclusion pen	14	MF32-3-AR	4	1	0	0	0
MF	MF32-3	outside exclusion pen	14	MF32-3-BL	3	3	0	0	0
MF	MF32-3	outside exclusion pen	14	MF32-3-BR	0	0	0	0	0
MF	MF32-4	outside exclusion pen	14	MF32-4-AL	0	0	0	0	0
MF	MF32-4	outside exclusion pen	14	MF32-4-AR	5	5	0	0	0
MF	MF32-4	outside exclusion pen	14	MF32-4-BL	7	6	0	0	0
MF	MF32-4	outside exclusion pen	14	MF32-4-BR	15	0	13	0	0
MF	MF34-1	outside exclusion pen	14	MF34-1-AL	9	0	1	0	0
MF	MF34-1	outside exclusion pen	14	MF34-1-AR	7	3	0	0	0
MF	MF34-1	outside exclusion pen	14	MF34-1-BL	16	4	10	0	0
MF	MF34-1	outside exclusion pen	14	MF34-1-BR	19	19	0	0	0
MF	MF34-2	inside exclusion pen	15	MF34-2-AL	0	0	0	0	0
MF	MF34-2	inside exclusion pen	15	MF34-2-AR	0	0	0	0	0
MF	MF34-2	inside exclusion pen	15	MF34-2-BL	1	0	1	0	0
MF	MF34-2	inside exclusion pen	15	MF34-2-BR	0	0	0	0	0
MF	MF34-3	outside exclusion pen	14	MF34-3-AL	75	66	3	0	0
MF	MF34-3	outside exclusion pen	14	MF34-3-AR	18	10	2	0	0
MF	MF34-3	outside exclusion pen	14	MF34-3-BL	6	0	4	0	0
MF	MF34-3	outside exclusion pen	14	MF34-3-BR	10	3	3	0	0
MF	MF34-4	outside exclusion pen	13	MF34-4-AL	17	6	2	1	6
MF	MF34-4	outside exclusion pen	13	MF34-4-AR	2	1	1	0	0
MF	MF34-4	outside exclusion pen	13	MF34-4-BL	3	0	1	1	0
MF	MF34-4	outside exclusion pen	13	MF34-4-BR	46	3	36	0	0
MF	MF37-1	outside exclusion pen	14	MF37-1-AL	1	0	1	0	0
MF	MF37-1	outside exclusion pen	14	MF37-1-AR	3	0	2	0	1
MF	MF37-1	outside exclusion pen	14	MF37-1-BL	7	7	0	0	0
MF	MF37-1	outside exclusion pen	14	MF37-1-BR	0	0	0	0	0
MF	MF37-2	outside exclusion pen	14	MF37-2-AL	35	22	9	0	0
MF	MF37-2	outside exclusion pen	14	MF37-2-AR	5	4	1	0	0
MF	MF37-2	outside exclusion pen	14	MF37-2-BL	1	0	0	0	0
MF	MF37-2	outside exclusion pen	14	MF37-2-BR	68	67	1	0	0
MF	MF37-3	inside exclusion pen	14	MF37-3-AL	0	0	0	0	0
MF	MF37-3	inside exclusion pen	14	MF37-3-AR	0	0	0	0	0
MF	MF37-3	inside exclusion pen	14	MF37-3-BL	0	0	0	0	0
MF	MF37-3	inside exclusion pen	14	MF37-3-BR	1	0	1	0	0
MF	MF37-4	outside exclusion pen	14	MF37-4-AL	2	0	0	1	0
MF	MF37-4	outside exclusion pen	14	MF37-4-AR	15	13	1	0	0
MF	MF37-4	outside exclusion pen	14	MF37-4-BL	3	1	2	0	0
MF	MF37-4	outside exclusion pen	14	MF37-4-BR	7	2	5	0	0
MF	MF38-1	outside exclusion pen	14	MF38-1-AL	8	0	2	2	1
MF	MF38-1	outside exclusion pen	14	MF38-1-AR	5	1	2	2	0
MF	MF38-1	outside exclusion pen	14	MF38-1-BL	9	7	1	0	0
MF	MF38-1	outside exclusion pen	14	MF38-1-BR	11	5	4	2	0
MF	MF38-2	inside exclusion pen	14	MF38-2-AL	0	0	0	0	0
MF	MF38-2	inside exclusion pen	14	MF38-2-AR	0	0	0	0	0
MF	MF38-2	inside exclusion pen	14	MF38-2-BL	0	0	0	0	0
MF	MF38-2	inside exclusion pen	14	MF38-2-BR	1	0	0	1	0
MF	MF38-3	outside exclusion pen	14	MF38-3-AL	8	1	0	0	0
MF	MF38-3	outside exclusion pen	14	MF38-3-AR	24	22	0	0	0
MF	MF38-3	outside exclusion pen	14	MF38-3-BL	19	14	0	0	0
MF	MF38-3	outside exclusion pen	14	MF38-3-BR	13	8	0	0	0
MF	MF38-4	outside exclusion pen	14	MF38-4-AL	17	16	0	1	0
MF	MF38-4	outside exclusion pen	14	MF38-4-AR	16	13	0	1	0
MF	MF38-4	outside exclusion pen	14	MF38-4-BL	20	5	4	0	0
MF	MF38-4	outside exclusion pen	14	MF38-4-BR	19	19	0	0	0
					2591	1509	405	252	49

## Sheet: small plots
Polygon	polygon_pair	roos	veg_trees	veg_shrubs	Site	Log_treatment	logs D	logs C	added log vol	bettong_exclusion	bettongs	period	Element	Site element code	Element type	old log	added log	open	tree	GC	GC_lawn	GC_tussock	GC_litter	scald	No Euc adults	No Euc saplings	No Euc juveniles	No shrubs	tree spp	% logs	% litter	% lawn	% joycea	% scald	% shrubs	% rock	% other	No of prior digs	No pebbles retrieved	No of new digs	bettong	rabbit	bird	unknown	other	Season	Bettong population
MF19A	7	Y	H	H	MF19A-4	dispersed	Y	N	20	bettongs	Y	13	DLL	MF19A-4-DLL	log	N	Y	N	N	lawn	Y	N	N	N	1	1	0	0		0	25	25	0	50	0	0	0	7	5	4	2	0	0	2	0	1	121
MF19A	7	Y	H	H	MF19A-4	dispersed	Y	N	20	bettongs	Y	13	OT	MF19A-4-OT	open	N	N	Y	N	tussock	N	Y	N	N	0	0	0	0		0	25	25	50	0	0	0	0	2	2	2	2	0	0	0	0	1	121
MF19A	7	Y	H	H	MF19A-4	dispersed	Y	N	20	bettongs	Y	13	OL	MF19A-4-OL	open	N	N	Y	N	lawn	Y	N	N	N	0	0	3	1		0	0	50	0	50	0	0	0	2	1	7	6	0	0	1	0	1	121
MF19A	7	Y	H	H	MF19A-4	dispersed	Y	N	20	bettongs	Y	13	S	MF19A-4-S	open	N	N	Y	N	bare	N	N	N	Y	0	1	0	0		0	20	0	0	80	0	0	0	11	9	2	1	0	0	1	0	1	121
MF19A	7	Y	H	H	MF19A-4	dispersed	Y	N	20	bettongs	Y	13	TT	MF19A-4-TT	tree	N	N	N	Y	tussock	N	Y	N	N	1	0	0	0	BRG	0	0	70	30	0	0	0	0	20	10	4	2	0	0	2	0	1	121
MF19A	7	Y	H	H	MF19A-4	dispersed	Y	N	20	bettongs	Y	13	TL	MF19A-4-TL	tree	N	N	N	Y	lawn	Y	N	N	N	1	0	1	0	BRG	0	0	100	0	0	0	0	0	8	7	12	7	0	4	1	0	1	121
MF19A	7	Y	H	H	MF19A-4	dispersed	Y	N	20	bettongs	Y	13	TS	MF19A-4-TS	tree	N	N	N	Y	litter	N	N	Y	N	1	0	1	4	YB	0	100	0	0	0	0	0	0	9	3	2	2	0	0	0	0	1	121
MF19A	7	Y	H	H	MF19A-4	dispersed	Y	N	20	bettongs	Y	13	OLL	MF19A-4-OLL	log	Y	N	N	N	lawn	Y	N	N	N	1	0	2	2		0	90	10	0	0	0	0	0	4	2	3	0	0	0	3	0	1	121
MF27A	12	Y	L	L	MF27A-2	dispersed	Y	N	20	bettongs	Y	14	TT	MF27A-2-TT	tree	N	N	N	Y	tussock	N	Y	N	N	1	0	0	0	BRG	0	0	60	40	0	0	0	0	4	1	2	2	0	0	0	0	1	127
MF27A	12	Y	L	L	MF27A-2	dispersed	Y	N	20	bettongs	Y	14	TL	MF27A-2-TL	tree	N	N	N	Y	lawn	Y	N	N	N	1	0	0	0	BRG	0	0	100	0	0	0	0	0	1	1	0	0	0	0	0	0	1	127
MF27A	12	Y	L	L	MF27A-2	dispersed	Y	N	20	bettongs	Y	14	TS	MF27A-2-TS	tree	N	N	N	Y	litter	N	N	Y	N	1	0	0	0	YB	0	70	20	0	0	0	10	0	8	0	19	1	17	0	1	0	1	127
MF27A	12	Y	L	L	MF27A-2	dispersed	Y	N	20	bettongs	Y	14	OLT	MF27A-2-OLT	log	Y	N	N	N	tussock	N	Y	N	N	0	0	0	0		10	0	65	25	0	0	0	0	0	0	0	0	0	0	0	0	1	127
MF27A	12	Y	L	L	MF27A-2	dispersed	Y	N	20	bettongs	Y	14	OLL	MF27A-2-OLL	log	Y	N	N	N	lawn	Y	N	N	N	0	0	0	4		5	0	95	0	0	0	0	0	4	3	0	0	0	0	0	0	1	127
MF27A	12	Y	L	L	MF27A-2	dispersed	Y	N	20	bettongs	Y	14	DLL	MF27A-2-DLL	log	N	Y	N	N	lawn	Y	N	N	N	0	0	0	0		20	0	80	0	0	0	0	0	0	0	0	0	0	0	0	0	1	127
MF27A	12	Y	L	L	MF27A-2	dispersed	Y	N	20	bettongs	Y	14	OT	MF27A-2-OT	open	N	N	Y	N	tussock	N	Y	N	N	0	0	0	1		0	0	75	25	0	0	0	0	5	4	0	0	0	0	0	0	1	127
MF27A	12	Y	L	L	MF27A-2	dispersed	Y	N	20	bettongs	Y	14	OL	MF27A-2-OL	open	N	N	Y	N	lawn	Y	N	N	N	0	0	0	1		0	0	80	0	10	0	0	0	1	0	1	0	1	0	0	0	1	127
MF27A	12	Y	L	L	MF27A-2	dispersed	Y	N	20	bettongs	Y	14	S	MF27A-2-S	open	N	N	Y	N	bare	N	N	N	Y	0	0	0	0		0	0	50	0	25	0	0	25	6	8	0	0	0	0	0	0	1	127
MF32	12	Y	L	L	MF32-2	clumped	N	Y	20	exclusion	N	15	TT	MF32-2-TT	tree	N	N	N	Y	tussock	N	Y	N	N	4	0	0	0	YB	0	20	0	80	0	0	0	0	0	0	0	0	0	0	0	0	1	128
MF32	12	Y	L	L	MF32-2	clumped	N	Y	20	exclusion	N	15	TL	MF32-2-TL	tree	N	N	N	Y	lawn	Y	N	N	N	1	0	0	0	BRG	0	0	100	0	0	0	0	0	1	1	0	0	0	0	0	0	1	128
MF32	12	Y	L	L	MF32-2	clumped	N	Y	20	exclusion	N	15	TS	MF32-2-TS	tree	N	N	N	Y	litter	N	N	Y	N	1	0	0	1	YB	0	95	5	0	0	0	0	0	0	0	0	0	0	0	0	0	1	128
MF32	12	Y	L	L	MF32-2	clumped	N	Y	20	exclusion	N	15	OLT	MF32-2-OLT	log	Y	N	N	N	tussock	N	Y	N	N	0	0	0	0		30	15	15	40	0	0	0	0	0	0	0	0	0	0	0	0	1	128
MF32	12	Y	L	L	MF32-2	clumped	N	Y	20	exclusion	N	15	OLL	MF32-2-OLL	log	Y	N	N	N	lawn	Y	N	N	N	0	0	0	0		5	35	60	0	0	0	0	0	0	0	0	0	0	0	0	0	1	128
MF32	12	Y	L	L	MF32-2	clumped	N	Y	20	exclusion	N	15	CLT	MF32-2-CLT	log	N	Y	N	N	tussock	N	Y	N	N	0	0	0	0		30	0	65	5	0	0	0	0	0	0	0	0	0	0	0	0	1	128
MF32	12	Y	L	L	MF32-2	clumped	N	Y	20	exclusion	N	15	CLL	MF32-2-CLL	log	N	Y	N	N	lawn	Y	N	N	N	0	0	0	1		30	0	70	0	0	0	0	0	5	5	0	0	0	0	0	0	1	128
MF32	12	Y	L	L	MF32-2	clumped	N	Y	20	exclusion	N	15	OT	MF32-2-OT	open	N	N	Y	N	tussock	N	Y	N	N	0	0	0	0		0	5	5	90	0	0	0	0	0	0	0	0	0	0	0	0	1	128
MF32	12	Y	L	L	MF32-2	clumped	N	Y	20	exclusion	N	15	OL	MF32-2-OL	open	N	N	Y	N	lawn	Y	N	N	N	0	0	0	9		0	0	100	0	0	0	0	0	0	0	0	0	0	0	0	0	1	128
MF32	12	Y	L	L	MF32-2	clumped	N	Y	20	exclusion	N	15	S	MF32-2-S	open	N	N	Y	N	bare	N	N	N	Y	0	0	0	0		0	0	10	0	90	0	0	0	2	1	0	0	0	0	0	0	1	128
MF9A	9	N	L	H	MF9A-1	dispersed	Y	N	20	bettongs	Y	14	TT	MF9A-1-TT	tree	N	N	N	Y	tussock	N	Y	N	N	2	0	0	5		0	40	0	50	0	10	0	0	5	2	2	0	2	0	0	0	1	133
MF9A	9	N	L	H	MF9A-1	dispersed	Y	N	20	bettongs	Y	14	TL	MF9A-1-TL	tree	N	N	N	Y	lawn	Y	N	N	N	1	0	0	1	BRG	0	0	90	0	10	0	0	0	0	0	0	0	0	0	0	0	1	133
MF9A	9	N	L	H	MF9A-1	dispersed	Y	N	20	bettongs	Y	14	TS	MF9A-1-TS	tree	N	N	N	Y	litter	N	N	Y	N	2	0	0	0	BRG	0	100	0	0	0	0	0	0	3	1	2	0	2	0	0	0	1	133
MF9A	9	N	L	H	MF9A-1	dispersed	Y	N	20	bettongs	Y	14	OLL	MF9A-1-OLL	log	Y	N	N	N	lawn	Y	N	N	N	0	0	0	0		5	0	95	0	0	0	0	0	0	0	2	2	0	0	0	0	1	133
MF9A	9	N	L	H	MF9A-1	dispersed	Y	N	20	bettongs	Y	14	DLL	MF9A-1-DLL	log	N	Y	N	N	lawn	Y	N	N	N	3	0	0	0		20	0	80	0	0	0	0	0	35	21	7	7	0	0	0	0	1	133
MF9A	9	N	L	H	MF9A-1	dispersed	Y	N	20	bettongs	Y	14	OL	MF9A-1-OL	open	N	N	Y	N	lawn	Y	N	N	N	0	0	0	1		0	0	100	0	0	0	0	0	24	21	1	1	0	0	0	0	1	133
MF9A	9	N	L	H	MF9A-1	dispersed	Y	N	20	bettongs	Y	14	S	MF9A-1-S	open	N	N	Y	N	bare	N	N	N	Y	0	0	0	1		0	0	20	0	60	0	0	0	4	3	1	1	0	0	0	0	1	133
MF16A	11	N	L	H	MF16A-1	clumped	N	Y	20	bettongs	Y	14	OLL	MF16A-1-OLL	log	Y	N	N	N	lawn	Y	N	N	N	0	0	0	0		10	0	90	0	0	0	0	0	7	4	4	3	0	0	1	0	1	137
MF16A	11	N	L	H	MF16A-1	clumped	N	Y	20	bettongs	Y	14	CLL	MF16A-1-CLL	log	N	Y	N	N	lawn	Y	N	N	N	0	0	0	0		20	0	80	0	0	0	0	0	0	0	3	3	0	0	0	0	1	137
MF16A	11	N	L	H	MF16A-1	clumped	N	Y	20	bettongs	Y	14	OL	MF16A-1-OL	open	N	N	Y	N	lawn	Y	N	N	N	0	0	0	0		0	0	100	0	0	0	0	0	3	2	0	0	0	0	0	0	1	137
MF19A	7	Y	H	H	MF19A-3	clumped	N	Y	20	exclusion	N	14	TT	MF19A-3-TT	tree	N	N	N	Y	tussock	N	Y	N	N	1	1	0	0	Red stringybark	0	60	0	40	0	0	0	0	0	0	0	0	0	0	0	0	1	145
MF19A	7	Y	H	H	MF19A-3	clumped	N	Y	20	exclusion	N	14	TL	MF19A-3-TL	tree	N	N	N	Y	lawn	Y	N	N	N	1	0	1	0	YB	0	5	95	0	0	0	0	0	2	2	0	0	0	0	0	0	1	145
MF19A	7	Y	H	H	MF19A-3	clumped	N	Y	20	exclusion	N	14	TS	MF19A-3-TS	tree	N	N	N	Y	litter	N	N	Y	N	2	1	0	0	YB	0	100	0	0	0	0	0	0	0	0	1	0	1	0	0	0	1	145
MF19A	7	Y	H	H	MF19A-3	clumped	N	Y	20	exclusion	N	14	OLT	MF19A-3-OLT	log	Y	N	N	N	tussock	N	Y	N	N	0	0	0	0		5	15	20	60	0	0	0	0	0	0	0	0	0	0	0	0	1	145
MF19A	7	Y	H	H	MF19A-3	clumped	N	Y	20	exclusion	N	14	OLL	MF19A-3-OLL	log	Y	N	N	N	lawn	Y	N	N	N	0	0	0	0		10	45	45	0	0	0	0	0	0	0	0	0	0	0	0	0	1	145
MF19A	7	Y	H	H	MF19A-3	clumped	N	Y	20	exclusion	N	14	CLT	MF19A-3-CLT	log	N	Y	N	N	tussock	N	Y	N	N	1	0	0	0		20	20	40	20	0	0	0	0	0	0	0	0	0	0	0	0	1	145
MF19A	7	Y	H	H	MF19A-3	clumped	N	Y	20	exclusion	N	14	CLL	MF19A-3-CLL	log	N	Y	N	N	lawn	Y	N	N	N	0	0	1	0		40	20	40	0	0	0	0	0	0	0	0	0	0	0	0	0	1	145
MF19A	7	Y	H	H	MF19A-3	clumped	N	Y	20	exclusion	N	14	OT	MF19A-3-OT	open	N	N	Y	N	tussock	N	Y	N	N	0	0	0	0		0	40	20	40	0	0	0	0	0	0	1	0	0	1	0	0	1	145
MF19A	7	Y	H	H	MF19A-3	clumped	N	Y	20	exclusion	N	14	OL	MF19A-3-OL	open	N	N	Y	N	lawn	Y	N	N	N	0	0	0	0		5	40	45	0	0	0	0	0	1	1	2	0	0	1	1	0	1	145
MF19A	7	Y	H	H	MF19A-3	clumped	N	Y	20	exclusion	N	14	S	MF19A-3-S	open	N	N	Y	N	bare	N	N	N	Y	0	0	0	2		0	0	10	0	90	0	0	0	3	0	0	0	0	0	0	0	1	145
MF11A	11	N	L	H	MF11A-3	dispersed	Y	N	20	exclusion	N	14	TL	MF11-3-TL	tree	N	N	N	Y	lawn	Y	N	N	N	1	1	0	1	YB	0	20	80	0	0	0	0	0	0	0	0	0	0	0	0	0	2	153
MF11A	11	N	L	H	MF11A-3	dispersed	Y	N	20	exclusion	N	14	TS	MF11-3-TS	tree	N	N	N	Y	litter	N	N	Y	N	2	0	1	1	Red stringybark	0	50	50	0	0	0	0	0	2	2	0	0	0	0	0	0	2	153
MF11A	11	N	L	H	MF11A-3	dispersed	Y	N	20	exclusion	N	14	OLL	MF11-3-OLL	log	Y	N	N	N	lawn	Y	N	N	N	0	0	1	0		10	0	90	0	0	0	0	0	2	0	0	0	0	0	0	0	2	153
MF11A	11	N	L	H	MF11A-3	dispersed	Y	N	20	exclusion	N	14	DLL	MF11-3-DLL	log	N	Y	N	N	lawn	Y	N	N	N	0	0	0	1		15	0	85	0	0	0	0	0	0	0	0	0	0	0	0	0	2	153
MF11A	11	N	L	H	MF11A-3	dispersed	Y	N	20	exclusion	N	14	OL	MF11-3-OL	open	N	N	Y	N	lawn	Y	N	N	N	0	0	0	0		0	0	100	0	0	0	0	0	0	0	0	0	0	0	0	0	2	153
MF11A	11	N	L	H	MF11A-3	dispersed	Y	N	20	exclusion	N	14	S	MF11-3-S	open	N	N	Y	N	bare	N	N	N	Y	0	0	0	2		0	0	20	0	80	0	0	0	8	8	0	0	0	0	0	0	2	153
MF9A	9	N	L	H	MF9A-3	clumped	N	Y	20	bettongs	Y	14	TL	MF9A-3-TL	tree	N	N	N	Y	lawn	Y	N	N	N	2	0	0	5		0	0	90	0	5	0	5	0	3	1	1	1	0	0	0	0	2	157
MF9A	9	N	L	H	MF9A-3	clumped	N	Y	20	bettongs	Y	14	TS	MF9A-3-TS	tree	N	N	N	Y	litter	N	N	Y	N	1	0	0	0	YB	0	95	5	0	0	0	0	0	9	3	1	0	0	0	1	0	2	157
MF9A	9	N	L	H	MF9A-3	clumped	N	Y	20	bettongs	Y	14	OLL	MF9A-3-OLL	log	Y	N	N	N	lawn	Y	N	N	N	0	0	1	5		10	75	5	0	0	0	10	0	9	5	1	1	0	0	0	0	2	157
MF9A	9	N	L	H	MF9A-3	clumped	N	Y	20	bettongs	Y	14	CLL	MF9A-3-CLL	log	N	Y	N	N	lawn	Y	N	N	N	0	0	0	0		20	20	40	0	0	0	20	0	5	4	0	0	0	0	0	0	2	157
MF9A	9	N	L	H	MF9A-3	clumped	N	Y	20	bettongs	Y	14	OL	MF9A-3-OL	open	N	N	Y	N	lawn	Y	N	N	N	0	0	0	0		0	0	100	0	0	0	0	0	0	0	1	1	0	0	0	0	2	157
MF9A	9	N	L	H	MF9A-3	clumped	N	Y	20	bettongs	Y	14	S	MF9A-3-S	open	N	N	Y	N	bare	N	N	N	Y	0	0	0	0		0	0	10	0	90	0	0	0	1	0	1	0	0	0	1	0	2	157
MF9A	9	N	L	H	MF9A-4	clumped	N	Y	20	bettongs	Y	14	TL	MF9A-4-TL	tree	N	N	N	Y	lawn	Y	N	N	N	1	0	0	0	YB	0	0	100	0	0	0	0	0	7	4	20	20	0	0	0	0	3	179
MF9A	9	N	L	H	MF9A-4	clumped	N	Y	20	bettongs	Y	14	TS	MF9A-4-TS	tree	N	N	N	Y	litter	N	N	Y	N	1	0	0	1	BRG	0	70	30	0	0	0	0	0	7	6	1	0	1	0	0	0	3	179
MF9A	9	N	L	H	MF9A-4	clumped	N	Y	20	bettongs	Y	14	OLL	MF9A-4-OLL	log	Y	N	N	N	lawn	Y	N	N	N	0	0	0	0		10	30	40	0	0	0	20	0	2	1	3	0	3	0	0	0	3	179
MF9A	9	N	L	H	MF9A-4	clumped	N	Y	20	bettongs	Y	14	CLL	MF9A-4-CLL	log	N	Y	N	N	lawn	Y	N	N	N	0	0	0	0		30	10	60	0	0	0	0	0	30	28	1	1	0	0	0	0	3	179
MF9A	9	N	L	H	MF9A-4	clumped	N	Y	20	bettongs	Y	14	OL	MF9A-4-OL	open	N	N	Y	N	lawn	Y	N	N	N	0	0	0	0		0	0	90	0	10	0	0	0	0	0	0	0	0	0	0	0	3	179
MF11A	11	N	L	H	MF11A-2	both	Y	Y	40	bettongs	Y	14	TL	MF11A-2-TL	tree	N	N	N	Y	lawn	Y	N	N	N	1	0	0	1	YB	0	20	80	0	0	0	0	0	12	6	5	5	0	0	0	0	2	173
MF11A	11	N	L	H	MF11A-2	both	Y	Y	40	bettongs	Y	14	TS	MF11A-2-TS	tree	N	N	N	Y	litter	N	N	Y	N	1	0	1	1	YB	0	60	40	0	0	0	0	0	5	3	1	1	0	0	0	0	2	173
MF11A	11	N	L	H	MF11A-2	both	Y	Y	40	bettongs	Y	14	OLL	MF11A-2-OLL	log	Y	N	N	N	lawn	Y	N	N	N	1	0	0	0		5	20	75	0	0	0	0	0	2	2	0	0	0	0	0	0	2	173
MF11A	11	N	L	H	MF11A-2	both	Y	Y	40	bettongs	Y	14	DLL	MF11A-2-DLL	log	N	Y	N	N	lawn	Y	N	N	N	0	0	0	0		10	0	90	0	0	0	0	0	0	0	0	0	0	0	0	0	2	173
MF11A	11	N	L	H	MF11A-2	both	Y	Y	40	bettongs	Y	14	CLL	MF11A-2-CLL	log	N	Y	N	N	lawn	Y	N	N	N	0	0	0	0		30	0	70	0	0	0	0	0	1	0	0	0	0	0	0	0	2	173
MF11A	11	N	L	H	MF11A-2	both	Y	Y	40	bettongs	Y	14	OL	MF11A-2-OL	open	N	N	Y	N	lawn	Y	N	N	N	0	0	0	0		0	0	100	0	0	0	0	0	14	7	0	0	0	0	0	0	2	173
MF11A	11	N	L	H	MF11A-2	both	Y	Y	40	bettongs	Y	14	S	MF11A-2-S	open	N	N	Y	N	bare	N	N	N	Y	0	0	0	0		0	0	40	0	60	0	0	0	4	0	1	0	0	0	1	0	2	173
MF11A	11	N	L	H	MF9A-2	dispersed	Y	N	20	exclusion	N	14	TL	MF9A-2-TL	tree	N	N	N	Y	lawn	Y	N	N	N	2	0	0	0	YB	0	10	90	0	0	0	0	0	1	0	0	0	0	0	0	0	2	165
MF9A	9	N	L	H	MF9A-2	dispersed	Y	N	20	exclusion	N	14	TS	MF9A-2-TS	tree	N	N	N	Y	litter	N	N	Y	N	1	1	0	0	YB	0	50	50	0	0	0	0	0	1	1	0	0	0	0	0	0	2	165
MF9A	9	N	L	H	MF9A-2	dispersed	Y	N	20	exclusion	N	14	OLL	MF9A-2-OLL	log	Y	N	N	N	lawn	Y	N	N	N	1	0	0	0		5	0	75	0	0	0	20	0	0	0	1	0	0	0	0	1	2	165
MF9A	9	N	L	H	MF9A-2	dispersed	Y	N	20	exclusion	N	14	DLL	MF9A-2-DLL	log	N	Y	N	N	lawn	Y	N	N	N	0	0	0	3		0	0	100	0	0	0	0	0	0	0	0	0	0	0	0	0	2	165
MF9A	9	N	L	H	MF9A-2	dispersed	Y	N	20	exclusion	N	14	OL	MF9A-2-OL	open	N	N	Y	N	lawn	Y	N	N	N	0	0	0	1		0	0	100	0	0	0	0	0	2	1	0	0	0	0	0	0	2	165
MF9A	9	N	L	H	MF9A-2	dispersed	Y	N	20	exclusion	N	14	S	MF9A-2-S	open	N	N	Y	N	bare	N	N	N	Y	0	0	0	1		0	0	40	0	40	20	0	0	0	0	1	0	0	0	0	1	2	165
MF11A	11	N	L	H	MF11A-1	none	N	N	0	bettongs	Y	14	TL	MF11A-1-TL	tree	N	N	N	Y	lawn	Y	N	N	N	1	0	0	1	YB	0	10	90	0	0	0	0	0	26	16	7	7	0	0	0	0	2	173
MF11A	11	N	L	H	MF11A-1	none	N	N	0	bettongs	Y	14	TS	MF11A-1-TS	tree	N	N	N	Y	litter	N	N	Y	N	1	0	0	0	YB	0	40	60	0	0	0	0	0	17	14	4	1	0	0	3	0	2	173
MF11A	11	N	L	H	MF11A-1	none	N	N	0	bettongs	Y	14	OLL	MF11A-1-OLL	log	Y	N	N	N	lawn	Y	N	N	N	0	0	0	0		5	0	95	0	0	0	0	0	3	3	2	2	0	0	0	0	2	173
MF11A	11	N	L	H	MF11A-1	none	N	N	0	bettongs	Y	14	OL	MF11A-1-OL	open	N	N	Y	N	lawn	Y	N	N	N	0	0	0	0		0	0	100	0	0	0	0	0	0	0	0	0	0	0	0	0	2	173
MF11A	11	N	L	H	MF11A-1	none	N	N	0	bettongs	Y	14	S	MF11A-1-S	open	N	N	Y	N	bare	N	N	N	Y	0	0	0	0		0	0	30	0	70	0	0	0	4	4	0	0	0	0	0	0	2	173
MF16A	11	N	L	H	MF16A-2	both	Y	Y	40	bettongs	Y	14	TL	MF16A-2-TL	tree	N	N	N	Y	lawn	Y	N	N	N	1	0	0	0	YB	0	30	70	0	0	0	0	0	1	0	0	0	0	0	0	0	2	153
MF16A	11	N	L	H	MF16A-2	both	Y	Y	40	bettongs	Y	14	TS	MF16A-2-TS	tree	N	N	N	Y	litter	N	N	Y	N	1	0	0	0	E. manifera	0	100	0	0	0	0	0	0	4	3	0	0	0	0	0	0	2	153
MF16A	11	N	L	H	MF16A-2	both	Y	Y	40	bettongs	Y	14	OLL	MF16A-2-OLL	log	Y	N	N	N	lawn	Y	N	N	N	0	0	0	0		10	0	90	0	0	0	0	0	33	11	1	1	0	0	0	0	2	153
MF16A	11	N	L	H	MF16A-2	both	Y	Y	40	bettongs	Y	14	DLL	MF16A-2-DLL	log	N	Y	N	N	lawn	Y	N	N	N	0	0	0	0		10	0	90	0	0	0	0	0	1	1	0	0	0	0	0	0	2	153
MF16A	11	N	L	H	MF16A-2	both	Y	Y	40	bettongs	Y	14	CLL	MF16A-2-CLL	log	N	Y	N	N	lawn	Y	N	N	N	0	0	0	0		30	0	100	0	0	0	0	0	3	1	0	0	0	0	0	0	2	153
MF16A	11	N	L	H	MF16A-2	both	Y	Y	40	bettongs	Y	14	OL	MF16A-2-OL	open	N	N	Y	N	lawn	Y	N	N	N	0	0	0	0		0	0	100	0	0	0	0	0	8	4	4	4	0	0	0	0	2	153
MF16A	11	N	L	H	MF16A-2	both	Y	Y	40	bettongs	Y	14	S	MF16A-2-S	open	N	N	Y	N	bare	N	N	N	Y	0	0	0	0		0	0	30	0	70	0	0	0	0	0	0	0	0	0	0	0	2	153
MF11A	11	N	L	H	MF11A-4	clumped	N	Y	20	bettongs	Y	14	TT	MF11A-4-TT	tree	N	N	N	Y	tussock	N	Y	N	N	2	0	0	0	BRG	0	40	45	15	0	0	0	0	2	0	1	1	0	0	0	0	3	185
MF11A	11	N	L	H	MF11A-4	clumped	N	Y	20	bettongs	Y	14	TL	MF11A-4-TL	tree	N	N	N	Y	lawn	Y	N	N	N	1	0	0	1	BRG	0	10	90	0	0	0	0	0	2	1	0	0	0	0	0	0	3	185
MF11A	11	N	L	H	MF11A-4	clumped	N	Y	20	bettongs	Y	14	TS	MF11A-4-TS	tree	N	N	N	Y	litter	N	N	Y	N	2	0	3	0	YB	0	70	30	0	0	0	0	0	13	8	7	7	0	0	0	0	3	185
MF11A	11	N	L	H	MF11A-4	clumped	N	Y	20	bettongs	Y	14	OLL	MF11A-4-OLL	log	Y	N	N	N	lawn	Y	N	N	N	0	0	0	0		10	10	80	0	0	0	0	0	12	7	3	1	0	2	0	0	3	185
MF11A	11	N	L	H	MF11A-4	clumped	N	Y	20	bettongs	Y	14	CLL	MF11A-4-CLL	log	N	Y	N	N	lawn	Y	N	N	N	0	1	2	1		30	30	40	0	0	0	0	0	5	3	2	0	2	0	0	0	3	185
MF11A	11	N	L	H	MF11A-4	clumped	N	Y	20	bettongs	Y	14	OL	MF11A-4-OL	open	N	N	Y	N	lawn	Y	N	N	N	0	0	0	0		0	0	100	0	0	0	0	0	12	9	4	1	0	0	3	0	3	185
MF11A	11	N	L	H	MF11A-4	clumped	N	Y	20	bettongs	Y	14	S	MF11A-4-S	open	N	N	Y	N	bare	N	N	N	Y	0	0	1	3		0	0	20	0	80	0	0	0	2	2	1	1	0	0	0	0	3	185
MF16A	11	N	L	H	MF16A-4	none	N	N	0	exclusion	N	14	TL	MF16A-4-TL	tree	N	N	N	Y	lawn	Y	N	N	N	1	0	1	0	BRG	0	0	100	0	0	0	0	0	2	2	0	0	0	0	0	0	2	162
MF16A	11	N	L	H	MF16A-4	none	N	N	0	exclusion	N	14	TS	MF16A-4-TS	tree	N	N	N	Y	litter	N	N	Y	N	1	0	2	1	BRG	0	40	60	0	0	0	0	0	0	0	0	0	0	0	0	0	2	162
MF16A	11	N	L	H	MF16A-4	none	N	N	0	exclusion	N	14	OLL	MF16A-4-OLL	log	Y	N	N	N	lawn	Y	N	N	N	2	1	1	0		5	30	65	0	0	0	0	0	1	0	0	0	0	0	0	0	2	162
MF16A	11	N	L	H	MF16A-4	none	N	N	0	exclusion	N	14	OL	MF16A-4-OL	open	N	N	Y	N	lawn	Y	N	N	N	0	0	0	1		0	0	100	0	0	0	0	0	0	0	0	0	0	0	0	0	2	162
MF16A	11	N	L	H	MF16A-4	none	N	N	0	exclusion	N	14	S	MF16A-4-S	open	N	N	Y	N	bare	N	N	N	Y	0	0	1	1		0	0	30	0	70	0	0	0	7	6	0	0	0	0	0	0	2	162
MF19A	7	Y	H	H	MF19A-1	none	N	N	0	bettongs	Y	14	TT	MF19A-1-TT	tree	N	N	N	Y	tussock	N	Y	N	N	2	0	0	0	Red stringybark	0	80	0	20	0	0	0	0	3	2	0	0	0	0	0	0	2	165
MF19A	7	Y	H	H	MF19A-1	none	N	N	0	bettongs	Y	14	TL	MF19A-1-TL	tree	N	N	N	Y	lawn	Y	N	N	N	1	0	0	1	Red stringybark	0	20	80	0	0	0	0	0	12	3	1	0	0	0	1	0	2	165
MF19A	7	Y	H	H	MF19A-1	none	N	N	0	bettongs	Y	14	TS	MF19A-1-TS	tree	N	N	N	Y	litter	N	N	Y	N	1	0	0	0	BRG	0	70	25	5	0	0	0	0	4	2	0	0	0	0	0	0	2	165
MF19A	7	Y	H	H	MF19A-1	none	N	N	0	bettongs	Y	14	OLL	MF19A-1-OLL	log	Y	N	N	N	lawn	Y	N	N	N	2	4	0	1		10	90	0	0	0	0	0	0	2	2	0	0	0	0	0	0	2	165
MF19A	7	Y	H	H	MF19A-1	none	N	N	0	bettongs	Y	14	OL	MF19A-1-OL	open	N	N	Y	N	lawn	Y	N	N	N	0	0	0	2		0	0	60	0	40	0	0	0	12	11	0	0	0	0	0	0	2	165
MF19A	7	Y	H	H	MF19A-1	none	N	N	0	bettongs	Y	14	S	MF19A-1-S	open	N	N	Y	N	bare	N	N	N	Y	0	0	0	0		0	0	10	0	90	0	0	0	0	0	0	0	0	0	0	0	2	165
MF19A	7	Y	H	H	MF19A-2	both	Y	Y	40	bettongs	Y	14	TL	MF19A-2-TL	tree	N	N	N	Y	lawn	Y	N	N	N	1	0	1	0	YB	0	10	90	0	0	0	0	0	4	1	0	0	0	0	0	0	2	172
MF19A	7	Y	H	H	MF19A-2	both	Y	Y	40	bettongs	Y	14	TS	MF19A-2-TS	tree	N	N	N	Y	litter	N	N	Y	N	1	0	0	0	BRG	0	100		0	0	0	0	0	1	0	1	1	0	0	0	0	2	172
MF19A	7	Y	H	H	MF19A-2	both	Y	Y	40	bettongs	Y	14	OLL	MF19A-2-OLL	log	Y	N	N	N	lawn	Y	N	N	N	0	0	0	0		5	85	10	0	0	0	0	0	1	0	1	0	0	0	1	0	2	172
MF19A	7	Y	H	H	MF19A-2	both	Y	Y	40	bettongs	Y	14	DLL	MF19A-2-DLL	log	N	Y	N	N	lawn	Y	N	N	N	0	0	1	1		10	20	70	0	0	0	0	0	3	2	1	0	0	0	1	0	2	172
MF19A	7	Y	H	H	MF19A-2	both	Y	Y	40	bettongs	Y	14	CLL	MF19A-2-CLL	log	N	Y	N	N	lawn	Y	N	N	N	0	0	0	0		30	20	50	0	0	0	0	0	3	2	0	0	0	0	0	0	2	172
MF19A	7	Y	H	H	MF19A-2	both	Y	Y	40	bettongs	Y	14	S	MF19A-2-S	open	N	N	Y	N	bare	N	N	N	Y	0	0	0	0		0	20	30	0	50	0	0	0	8	7	0	0	0	0	0	0	2	172
MF19A	7	Y	H	H	MF19A-2	both	Y	Y	40	bettongs	Y	14	OL	MF19A-2-OL	open	N	N	Y	N	lawn	Y	N	N	N	0	0	1	0		0	10	80	0	10	0	0	0	12	6	0	0	0	0	0	0	2	172
MF22A	8	N	L	H	MF22A-1	none	N	N	0	bettongs	Y	14	TT	MF22A-1-TT	tree	N	N	N	Y	tussock	N	Y	N	N	1	0	0	0	BRG	0	0	5	95	0	0	0	0	1	0	0	0	0	0	0	0	2	165
MF22A	8	N	L	H	MF22A-1	none	N	N	0	bettongs	Y	14	TL	MF22A-1-TL	tree	N	N	N	Y	lawn	Y	N	N	N	1	0	3	0	YB	0	10	80	10	0	0	0	0	4	1	0	0	0	0	0	0	2	165
MF22A	8	N	L	H	MF22A-1	none	N	N	0	bettongs	Y	14	OLT	MF22A-1-OLT	log	Y	N	N	N	tussock	N	Y	N	N	0	0	0	0		5	20	15	60	0	0	0	0	4	3	2	0	2	0	0	0	2	165
MF22A	8	N	L	H	MF22A-1	none	N	N	0	bettongs	Y	14	OLL	MF22A-1-OLL	log	Y	N	N	N	lawn	Y	N	N	N	0	0	0	0		10	0	90	0	0	0	0	0	90	45	8	5	1	1	1	0	2	165
MF22A	8	N	L	H	MF22A-1	none	N	N	0	bettongs	Y	14	OL	MF22A-1-OL	open	N	N	Y	N	lawn	Y	N	N	N	0	0	0	0		0	0	100	0	0	0	0	0	10	4	5	0	1	0	4	0	2	165
MF22A	8	N	L	H	MF22A-1	none	N	N	0	bettongs	Y	14	OT	MF22A-1-OT	open	N	N	Y	N	tussock	N	Y	N	N	0	0	0	6		0	20	10	30	0	20	0	20	7	6	1	0	0	0	1	0	2	165
MF22A	8	N	L	H	MF22A-2	clumped	N	Y	20	bettongs	Y	14	TT	MF22A-2-TT	tree	N	N	N	Y	tussock	N	Y	N	N	1	0	4	0	Red stringybark	0	30	50	20	0	0	0	0	8	6	0	0	0	0	0	0	3	186
MF22A	8	N	L	H	MF22A-2	clumped	N	Y	20	bettongs	Y	14	TL	MF22A-2-TL	tree	N	N	N	Y	lawn	Y	N	N	N	1	0	0	0	BRG	0	0	100	0	0	0	0	0	3	0	2	0	1	0	1	0	3	186
MF22A	8	N	L	H	MF22A-2	clumped	N	Y	20	bettongs	Y	14	TS	MF22A-2-TS	tree	N	N	N	Y	litter	N	N	Y	N	1	0	0	0	YB	0	95	0	5	0	0	0	0	14	2	13	13	0	0	0	0	3	186
MF22A	8	N	L	H	MF22A-2	clumped	N	Y	20	bettongs	Y	14	OLT	MF22A-2-OLT	log	Y	N	N	N	tussock	N	Y	N	N	0	0	0	1		10	0	40	50	0	0	0	0	9	3	0	0	0	0	0	0	3	186
MF22A	8	N	L	H	MF22A-2	clumped	N	Y	20	bettongs	Y	14	OLL	MF22A-2-OLL	log	Y	N	N	N	lawn	Y	N	N	N	0	0	0	0		5	0	95	0	0	0	0	0	3	2	3	3	0	0	0	0	3	186
MF22A	8	N	L	H	MF22A-2	clumped	N	Y	20	bettongs	Y	14	CLT	MF22A-2-CLT	log	N	Y	N	N	tussock	N	Y	N	N	0	0	0	5		40	0	50	5	0	5	0	0	7	4	1	0	1	0	0	0	3	186
MF22A	8	N	L	H	MF22A-2	clumped	N	Y	20	bettongs	Y	14	CLL	MF22A-2-CLL	log	N	Y	N	N	lawn	Y	N	N	N	0	0	0	0		20	5	75	0	0	0	0	0	1	0	3	1	2	0	0	0	3	186
MF22A	8	N	L	H	MF22A-2	clumped	N	Y	20	bettongs	Y	14	OT	MF22A-2-OT	open	N	N	Y	N	tussock	N	Y	N	N	0	0	0	3		0	0	55	40	0	5	0	0	36	20	1	1	0	0	0	0	3	186
MF22A	8	N	L	H	MF22A-2	clumped	N	Y	20	bettongs	Y	14	OL	MF22A-2-OL	open	N	N	Y	N	lawn	Y	N	N	N	0	0	0	0		0	0	100	0	0	0	0	0	60	52	1	1	0	0	0	0	3	186
MF22A	8	N	L	H	MF22A-2	clumped	N	Y	20	bettongs	Y	14	S	MF22A-2-S	open	N	N	Y	N	bare	N	N	N	Y	0	0	0	0		0	0	50	0	50	0	0	0	0	0	0	0	0	0	0	0	3	186
MF22A	8	N	L	H	MF22A-3	dispersed	Y	N	20	exclusion	N	14	TT	MF22A-3-TT	tree	N	N	N	Y	tussock	N	Y	N	N	1	0	0	0	YB	0	0	5	95	0	0	0	0	2	2	0	0	0	0	0	0	2	158
MF22A	8	N	L	H	MF22A-3	dispersed	Y	N	20	exclusion	N	14	TL	MF22A-3-TL	tree	N	N	N	Y	lawn	Y	N	N	N	1	0	0	4	YB	0	5	85	5	0	5	0	0	0	0	0	0	0	0	0	0	2	158
MF22A	8	N	L	H	MF22A-3	dispersed	Y	N	20	exclusion	N	14	OLT	MF22A-3-OLT	log	Y	N	N	N	tussock	N	Y	N	N	0	0	0	0		5	0	85	10	0	0	0	0	0	0	0	0	0	0	0	0	2	158
MF22A	8	N	L	H	MF22A-3	dispersed	Y	N	20	exclusion	N	14	OLL	MF22A-3-OLL	log	Y	N	N	N	lawn	Y	N	N	N	0	0	0	0		5	0	95	0	0	0	0	0	5	5	0	0	0	0	0	0	2	158
MF22A	8	N	L	H	MF22A-3	dispersed	Y	N	20	exclusion	N	14	DLT	MF22A-3-DLT	log	N	Y	N	N	tussock	N	Y	N	N	0	0	0	0		5	0	85	5	0	0	0	0	0	0	1	0	0	0	0	1	2	158
MF22A	8	N	L	H	MF22A-3	dispersed	Y	N	20	exclusion	N	14	DLL	MF22A-3-DLL	log	N	Y	N	N	lawn	Y	N	N	N	0	0	8	1		10	0	90	0	0	0	0	0	0	0	0	0	0	0	0	0	2	158
MF22A	8	N	L	H	MF22A-3	dispersed	Y	N	20	exclusion	N	14	OT	MF22A-3-OT	open	N	N	Y	N	tussock	N	Y	N	N	0	0	0	2		0	0	35	60	0	5	0	0	3	3	2	0	0	0	0	2	2	158
MF22A	8	N	L	H	MF22A-3	dispersed	Y	N	20	exclusion	N	14	OL	MF22A-3-OL	open	N	N	Y	N	lawn	Y	N	N	N	0	0	1	1		0	0	100	0	0	0	0	0	0	0	0	0	0	0	0	0	2	158
MF22A	8	N	L	H	MF22A-3	dispersed	Y	N	20	exclusion	N	14	S	MF22A-3-S	open	N	N	Y	N	bare	N	N	N	Y	0	0	0	0		0	0	20	0	80	0	0	0	3	3	0	0	0	0	0	0	2	158
MF22A	8	N	L	H	MF22A-4	both	Y	Y	40	bettongs	Y	12	TT	MF22A-4-TT	tree	N	N	N	Y	tussock	N	Y	N	N	1	0	0	1	BRG	0	5	35	60	0	0	0	0	1	0	1	1	0	0	0	0	3	185
MF22A	8	N	L	H	MF22A-4	both	Y	Y	40	bettongs	Y	12	TL	MF22A-4-TL	tree	N	N	N	Y	lawn	Y	N	N	N	1	0	2	0	BRG	0	10	90	0	0	0	0	0	1	1	0	0	0	0	0	0	3	185
MF22A	8	N	L	H	MF22A-4	both	Y	Y	40	bettongs	Y	12	TS	MF22A-4-TS	tree	N	N	N	Y	litter	N	N	Y	N	1	0	0	0	YB	0	50	50	0	0	0	0	0	7	4	9	2	0	6	1	0	3	185
MF22A	8	N	L	H	MF22A-4	both	Y	Y	40	bettongs	Y	12	OLT	MF22A-4-OLT	log	Y	N	N	N	tussock	N	Y	N	N	0	0	0	0		5	65	0	30	0	0	0	0	5	2	1	1	0	0	0	0	3	185
MF22A	8	N	L	H	MF22A-4	both	Y	Y	40	bettongs	Y	12	OLL	MF22A-4-OLL	log	Y	N	N	N	lawn	Y	N	N	N	0	0	0	0		5	0	95	0	0	0	0	0	0	0	0	0	0	0	0	0	3	185
MF22A	8	N	L	H	MF22A-4	both	Y	Y	40	bettongs	Y	12	DLT	MF22A-4-DLT	log	N	Y	N	N	tussock	N	Y	N	N	0	0	0	2		10	0	85	5	0	0	0	0	24	14	0	0	0	0	0	0	3	185
MF22A	8	N	L	H	MF22A-4	both	Y	Y	40	bettongs	Y	12	DLL	MF22A-4-DLL	log	N	Y	N	N	lawn	Y	N	N	N	0	0	0	1		10	0	90	0	0	0	0	0	0	0	0	0	0	0	0	0	3	185
MF22A	8	N	L	H	MF22A-4	both	Y	Y	40	bettongs	Y	12	CLL	MF22A-4-CLL	log	N	Y	N	N	lawn	Y	N	N	N	0	0	0	0		30	0	70	0	0	0	0	0	3	1	0	0	0	0	0	0	3	185
MF22A	8	N	L	H	MF22A-4	both	Y	Y	40	bettongs	Y	12	OT	MF22A-4-OT	open	N	N	Y	N	tussock	N	Y	N	N	0	0	0	0		0	0	40	10	50	0	0	0	33	18	1	1	0	0	0	0	3	185
MF22A	8	N	L	H	MF22A-4	both	Y	Y	40	bettongs	Y	12	OL	MF22A-4-OL	open	N	N	Y	N	lawn	Y	N	N	N	0	0	0	0		0	0	100	0	0	0	0	0	4	2	0	0	0	0	0	0	3	185
MF22A	8	N	L	H	MF22A-4	both	Y	Y	40	bettongs	Y	12	S	MF22A-4-S	open	N	N	Y	N	bare	N	N	N	Y	0	0	0	0		0	0	0	0	100	0	0	0	7	3	2	0	1	0	1	0	3	185
MF16A	11	N	L	H	MF16A-3	dispersed	Y	N	20	bettongs	Y	14	TL	MF16A-3-TL	tree	N	N	N	Y	lawn	Y	N	N	N	1	0	0	2	BRG	0	40	60	0	0	0	0	0	20	5	2	1	1	0	0	0	3	195
MF16A	11	N	L	H	MF16A-3	dispersed	Y	N	20	bettongs	Y	14	TS	MF16A-3-TS	tree	N	N	N	Y	litter	N	N	Y	N	1	0	0	2	BRG	0	70	30	0	0	0	0	0	17	1	3	2	1	0	0	0	3	195
MF16A	11	N	L	H	MF16A-3	dispersed	Y	N	20	bettongs	Y	14	OLL	MF16A-3-OLL	log	Y	N	N	N	lawn	Y	N	N	N	0	0	0	0		3	0	30	0	77	0	0	0	7	2	0	0	0	0	0	0	3	195
MF16A	11	N	L	H	MF16A-3	dispersed	Y	N	20	bettongs	Y	14	DLL	MF16A-3-DLL	log	N	Y	N	N	lawn	Y	N	N	N	0	0	0	2		10	0	90	0	0	0	0	0	2	0	0	0	0	0	0	0	3	195
MF16A	11	N	L	H	MF16A-3	dispersed	Y	N	20	bettongs	Y	14	OL	MF16A-3-OL	open	N	N	Y	N	lawn	Y	N	N	N	0	0	0	0		0	0	100	0	0	0	0	0	1	0	0	0	0	0	0	0	3	195
MF16A	11	N	L	H	MF16A-3	dispersed	Y	N	20	bettongs	Y	14	S	MF16A-3-S	open	N	N	Y	N	bare	N	N	N	Y	0	0	0	0		0	0	10	0	90	0	0	0	7	2	0	0	0	0	0	0	3	195
MF22AZ	9	N	L	L	MF22AZ-1	none	N	N	0	bettongs	Y	14	TT	MF22AZ-1-TT	tree	N	N	N	Y	tussock	N	Y	N	N	2	1	0	1		0	6	14	80	0	0	0	0	1	1	0	0	0	0	0	0	1	146
MF22AZ	9	N	L	L	MF22AZ-1	none	N	N	0	bettongs	Y	14	TL	MF22AZ-1-TL	tree	N	N	N	Y	lawn	Y	N	N	N	1	0	0	1	BRG	0	0	100	0	0	0	0	0	5	3	0	0	0	0	0	0	1	146
MF22AZ	9	N	L	L	MF22AZ-1	none	N	N	0	bettongs	Y	14	TS	MF22AZ-1-TS	tree	N	N	N	Y	litter	N	N	Y	N	2	0	0	0	YB	0	0	100	0	0	0	0	0	1	1	0	0	0	0	0	0	1	146
MF22AZ	9	N	L	L	MF22AZ-1	none	N	N	0	bettongs	Y	14	OLT	MF22AZ-1-OLT	log	Y	N	N	N	tussock	N	Y	N	N	0	0	0	5		5	7	8	80	0	0	0	0	1	1	1	0	0	0	1	0	1	146
MF22AZ	9	N	L	L	MF22AZ-1	none	N	N	0	bettongs	Y	14	OLL	MF22AZ-1-OLL	log	Y	N	N	N	lawn	Y	N	N	N	0	0	0	2		10	25	65	0	0	0	0	0	9	6	0	0	0	0	0	0	1	146
MF22AZ	9	N	L	L	MF22AZ-1	none	N	N	0	bettongs	Y	14	OT	MF22AZ-1-OT	open	N	N	Y	N	tussock	N	Y	N	N	0	0	0	0		0	0	40	60	0	0	0	0	4	2	3	0	0	0	0	3	1	146
MF22AZ	9	N	L	L	MF22AZ-1	none	N	N	0	bettongs	Y	14	OL	MF22AZ-1-OL	open	N	N	Y	N	lawn	Y	N	N	N	0	0	1	2		0	25	65	0	10	0	0	0	11	9	0	0	0	0	0	0	1	146
MF22AZ	9	N	L	L	MF22AZ-1	none	N	N	0	bettongs	Y	14	S	MF22AZ-1-S	open	N	N	Y	N	bare	N	N	N	Y	0	0	0	2		0	0	10	0	90	0	0	0	3	2	0	0	0	0	0	0	1	146
MF22AZ	9	N	L	L	MF22AZ-2	both	Y	Y	40	exclusion	N	13	TT	MF22AZ-2-TT	tree	N	N	N	Y	tussock	N	Y	N	N	1	0	0	11	BRG	0	10	0	80	0	10	0	0	1	1	0	0	0	0	0	0	2	160
MF22AZ	9	N	L	L	MF22AZ-2	both	Y	Y	40	exclusion	N	13	TS	MF22AZ-2-TS	tree	N	N	N	Y	litter	N	N	Y	N	2	0	0	3	Red stringybark	0	75	0	20	0	5	0	0	9	7	2	0	2	0	0	0	2	160
MF22AZ	9	N	L	L	MF22AZ-2	both	Y	Y	40	exclusion	N	13	OLT	MF22AZ-2-OLT	log	Y	N	N	N	tussock	N	Y	N	N	0	0	0	6		10	45	0	40	0	5	0	0	6	6	1	0	1	0	0	0	2	160
MF22AZ	9	N	L	L	MF22AZ-2	both	Y	Y	40	exclusion	N	13	DLT	MF22AZ-2-DLT	log	N	Y	N	N	tussock	N	Y	N	N	0	0	3	8		10	10	0	60	0	20	0	0	0	0	1	0	1	0	0	0	2	160
MF22AZ	9	N	L	L	MF22AZ-2	both	Y	Y	40	exclusion	N	13	CLT	MF22AZ-2-CLT	log	N	Y	N	N	tussock	N	Y	N	N	0	0	0	1		30	0	0	70	0	0	0	0	0	0	0	0	0	0	0	0	2	160
MF22AZ	9	N	L	L	MF22AZ-2	both	Y	Y	40	exclusion	N	13	OT	MF22AZ-2-OT	open	N	N	Y	N	tussock	N	Y	N	N	0	0	1	9		0	10	20	50	10	10	0	0	6	6	0	0	0	0	0	0	2	160
MF22AZ	9	N	L	L	MF22AZ-2	both	Y	Y	40	exclusion	N	13	OL	MF22AZ-2-OL	open	N	N	Y	N	lawn	Y	N	N	N	0	0	0	0		0	0	40	0	0	0	0	0	0	0	0	0	0	0	0	0	2	160
MF22AZ	9	N	L	L	MF22AZ-2	both	Y	Y	40	exclusion	N	13	S	MF22AZ-2-S	open	N	N	Y	N	bare	N	N	N	Y	0	0	0	11		0	20	30	0	30	20	0	0	0	0	0	0	0	0	0	0	2	160
MF22AZ	9	N	L	L	MF22AZ-3	both	Y	Y	40	bettongs	Y	14	TT	MF22AZ-3-TT	tree	N	N	N	Y	tussock	N	Y	N	N	3	0	0	0	BRG	0	20	10	70	0	0	0	0	2	0	1	1	0	0	0	0	2	156
MF22AZ	9	N	L	L	MF22AZ-3	both	Y	Y	40	bettongs	Y	14	TL	MF22AZ-3-TL	tree	N	N	N	Y	lawn	Y	N	N	N	2	0	0	0	BRG	0	0	100	0	0	0	0	0	3	3	0	0	0	0	0	0	2	156
MF22AZ	9	N	L	L	MF22AZ-3	both	Y	Y	40	bettongs	Y	14	TS	MF22AZ-3-TS	tree	N	N	N	Y	litter	N	N	Y	N	1	0	1	0	Red stringybark	0	90	0	10	0	0	0	0	0	0	1	0	0	0	1	0	2	156
MF22AZ	9	N	L	L	MF22AZ-3	both	Y	Y	40	bettongs	Y	14	OLT	MF22AZ-3-OLT	log	Y	N	N	N	tussock	N	Y	N	N	0	0	1	0		10	5	0	85	0	0	0	0	1	1	2	0	0	2	0	0	2	156
MF22AZ	9	N	L	L	MF22AZ-3	both	Y	Y	40	bettongs	Y	14	DLT	MF22AZ-3-DLT	log	N	Y	N	N	tussock	N	Y	N	N	0	1	3	15		15	0	0	60	0	0	0	25	4	3	0	0	0	0	0	0	2	156
MF22AZ	9	N	L	L	MF22AZ-3	both	Y	Y	40	bettongs	Y	14	DLL	MF22AZ-3-DLL	log	N	Y	N	N	lawn	Y	N	N	N	0	0	0	0		10	0	90	0	0	0	0	0	4	3	5	3	0	0	0	2	2	156
MF22AZ	9	N	L	L	MF22AZ-3	both	Y	Y	40	bettongs	Y	14	CLT	MF22AZ-3-CLT	log	N	Y	N	N	tussock	N	Y	N	N	0	0	4	2		30	30	10	30	0	0	0	0	5	2	1	1	0	0	0	0	2	156
MF22AZ	9	N	L	L	MF22AZ-3	both	Y	Y	40	bettongs	Y	14	CLL	MF22AZ-3-CLL	log	N	Y	N	N	lawn	Y	N	N	N	0	0	0	0		20	0	80	0	0	0	0	0	2	2	0	0	0	0	0	0	2	156
MF22AZ	9	N	L	L	MF22AZ-3	both	Y	Y	40	bettongs	Y	14	OT	MF22AZ-3-OT	open	N	N	Y	N	tussock	N	Y	N	N	0	0	1	1		0	0	70	30	0	0	0	0	2	2	2	0	1	1	0	0	2	156
MF22AZ	9	N	L	L	MF22AZ-3	both	Y	Y	40	bettongs	Y	14	OL	MF22AZ-3-OL	open	N	N	Y	N	lawn	Y	N	N	N	0	0	0	0		0	0	100	0	0	0	0	0	5	5	0	0	0	0	0	0	2	156
MF22AZ	9	N	L	L	MF22AZ-3	both	Y	Y	40	bettongs	Y	14	S	MF22AZ-3-S	open	N	N	Y	N	bare	N	N	N	Y	0	0	0	3		0	20	10	0	70	0	0	0	2	1	0	0	0	0	0	0	2	156
MF22AZ	9	N	L	L	MF22AZ-4	none	N	N	0	bettongs	Y	14	TL	MF22AZ-4-TL	tree	N	N	N	Y	lawn	Y	N	N	N	1	0	0	0	YB	0	30	70	0	0	0	0	0	11	2	3	3	0	0	0	0	3	195
MF22AZ	9	N	L	L	MF22AZ-4	none	N	N	0	bettongs	Y	14	TS	MF22AZ-4-TS	tree	N	N	N	Y	litter	N	N	Y	N	1	0	0	0	YB	0	70	30	0	0	0	0	0	3	0	0	0	0	0	0	0	3	195
MF22AZ	9	N	L	L	MF22AZ-4	none	N	N	0	bettongs	Y	14	OLL	MF22AZ-4-OLL	log	Y	N	N	N	lawn	Y	N	N	N	0	0	0	0		10	0	90	0	0	0	0	0	2	0	1	1	0	0	0	0	3	195
MF22AZ	9	N	L	L	MF22AZ-4	none	N	N	0	bettongs	Y	14	OL	MF22AZ-4-OL	open	N	N	Y	N	lawn	Y	N	N	N	0	0	0	0		0	0	100	0	0	0	0	0	1	0	0	0	0	0	0	0	3	195
MF22AZ	9	N	L	L	MF22AZ-4	none	N	N	0	bettongs	Y	14	S	MF22AZ-4-S	open	N	N	Y	N	bare	N	N	N	Y	0	0	0	0		0	0	10	0	90	0	0	0	1	0	1	0	1	0	0	0	3	195
MF25A	7	Y	H	L	MF25A-1	none	N	N	0	exclusion	N	14	TL	MF25A-1-TL	tree	N	N	N	Y	lawn	Y	N	N	N	1	0	0	0	YB	5	0	95	0	0	0	0	0	0	0	0	0	0	0	0	0	1	127
MF25A	7	Y	H	L	MF25A-1	none	N	N	0	exclusion	N	14	TS	MF25A-1-TS	tree	N	N	N	Y	litter	N	N	Y	N	3	0	0	1	BRG	0	95	5	0	0	0	0	0	14	1	15	0	0	15	0	0	1	127
MF25A	7	Y	H	L	MF25A-1	none	N	N	0	exclusion	N	14	OLL	MF25A-1-OLL	log	Y	N	N	N	lawn	Y	N	N	N	0	0	1	0		10	0	90	0	0	0	0	0	0	0	0	0	0	0	0	0	1	127
MF25A	7	Y	H	L	MF25A-1	none	N	N	0	exclusion	N	14	OL	MF25A-1-OL	open	N	N	Y	N	lawn	Y	N	N	N	0	0	0	0		0	5	95	0	0	0	0	0	7	4	0	0	0	0	0	0	1	127
MF25A	7	Y	H	L	MF25A-1	none	N	N	0	exclusion	N	14	S	MF25A-1-S	open	N	N	Y	N	bare	N	N	N	Y	0	0	0	0		0	60	10	0	30	0	0	0	4	3	2	0	0	2	0	0	1	127
MF25A	7	Y	H	L	MF25A-2	both	Y	Y	40	bettongs	Y	12	TL	MF25A-2-TL	tree	N	N	N	Y	lawn	Y	N	N	N	1	0	0	0	YB	0	10	90	0	0	0	0	0	9	7	0	0	0	0	0	0	2	160
MF25A	7	Y	H	L	MF25A-2	both	Y	Y	40	bettongs	Y	12	TS	MF25A-2-TS	tree	N	N	N	Y	litter	N	N	Y	N	1	0	0	0	YB	0	20	60	0	20	0	0	0	6	4	1	0	0	1	0	0	2	160
MF25A	7	Y	H	L	MF25A-2	both	Y	Y	40	bettongs	Y	12	OLL	MF25A-2-OLL	log	Y	N	N	N	lawn	Y	N	N	N	2	2	1	0		5	0	95	0	0	0	0	0	0	0	4	4	0	0	0	0	2	160
MF25A	7	Y	H	L	MF25A-2	both	Y	Y	40	bettongs	Y	12	DLL	MF25A-2-DLL	log	N	Y	N	N	lawn	Y	N	N	N	0	0	0	0		10	10	80	0	0	0	0	0	2	2	4	4	0	0	0	0	2	160
MF25A	7	Y	H	L	MF25A-2	both	Y	Y	40	bettongs	Y	12	CLL	MF25A-2-CLL	log	N	Y	N	N	lawn	Y	N	N	N	0	0	0	0		20	10	70	0	0	0	0	0	1	1	1	0	1	0	0	0	2	160
MF25A	7	Y	H	L	MF25A-2	both	Y	Y	40	bettongs	Y	12	OL	MF25A-2-OL	open	N	N	Y	N	lawn	Y	N	N	N	0	0	1	0		0	30	65	0	5	0	0	0	3	2	6	0	6	0	0	0	2	160
MF25A	7	Y	H	L	MF25A-2	both	Y	Y	40	bettongs	Y	12	S	MF25A-2-S	open	N	N	Y	N	bare	N	N	N	Y	0	0	0	0		0	0	5	0	95	0	0	0	4	4	2	1	1	0	0	0	2	160
MF25A	7	Y	H	L	MF25A-3	dispersed	Y	N	20	bettongs	Y	14	OLT	MF25A-3-OLT	log	Y	N	N	N	tussock	N	Y	N	N	0	1	0	0		5	0	55	40	0	0	0	0	5	2	1	0	1	0	0	0	2	156
MF25A	7	Y	H	L	MF25A-3	dispersed	Y	N	20	bettongs	Y	14	OLL	MF25A-3-OLL	log	Y	N	N	N	lawn	Y	N	N	N	1	1	1	0		15	0	80	0	0	0	0	5	6	3	3	0	1	1	1	0	2	156
MF25A	7	Y	H	L	MF25A-3	dispersed	Y	N	20	bettongs	Y	14	DLL	MF25A-3-DLL	log	N	Y	N	N	lawn	Y	N	N	N	0	0	1	0		10	0	90	0	0	0	0	0	12	5	1	1	0	0	0	0	2	156
MF25A	7	Y	H	L	MF25A-3	dispersed	Y	N	20	bettongs	Y	14	OL	MF25A-3-OL	open	N	N	Y	N	lawn	Y	N	N	N	0	0	0	0		0	0	40	0	60	0	0	0	6	4	2	0	0	0	0	2	2	156
MF25A	7	Y	H	L	MF25A-3	dispersed	Y	N	20	bettongs	Y	14	S	MF25A-3-S	open	N	N	Y	N	bare	N	N	N	Y	0	0	0	0		0	0	10	0	90	0	0	0	6	5	0	0	0	0	0	0	2	156
MF25A	7	Y	H	L	MF25A-3	dispersed	Y	N	20	bettongs	Y	14	TL	MF25A-3-TL	tree	N	N	N	Y	lawn	Y	N	N	N	1	0	0	0		5	10	85	0	0	0	0	0	3	2	1	0	0	1	0	0	2	156
MF25A	7	Y	H	L	MF25A-3	dispersed	Y	N	20	bettongs	Y	14	TS	MF25A-3-TS	tree	N	N	N	Y	litter	N	N	Y	N	1	0	0	0	BRG	5	50	45	0	0	0	0	0	4	1	4	2	2	0	0	0	2	156
MF25A	7	Y	H	L	MF25A-4	clumped	N	Y	20	bettongs	Y	13	TL	MF25A-4-TL	tree	N	N	N	Y	lawn	Y	N	N	N	1	0	0	0	YB	0	20	80	0	0	0	0	0	2	0	3	3	0	0	0	0	3	185
MF25A	7	Y	H	L	MF25A-4	clumped	N	Y	20	bettongs	Y	13	TS	MF25A-4-TS	tree	N	N	N	Y	litter	N	N	Y	N	2	0	0	0	BRG	0	100	0	0	0	0	0	0	4	4	1	1	0	0	0	0	3	185
MF25A	7	Y	H	L	MF25A-4	clumped	N	Y	20	bettongs	Y	13	OLL	MF25A-4-OLL	log	Y	N	N	N	lawn	Y	N	N	N	0	0	0	1		10	20	70	0	0	0	0	0	21	17	5	3	0	0	0	2	3	185
MF25A	7	Y	H	L	MF25A-4	clumped	N	Y	20	bettongs	Y	13	CLL	MF25A-4-CLL	log	N	Y	N	N	lawn	Y	N	N	N	0	0	0	0		30	70	0	0	0	0	0	0	10	8	6	4	2	0	0	0	3	185
MF25A	7	Y	H	L	MF25A-4	clumped	N	Y	20	bettongs	Y	13	OL	MF25A-4-OL	open	N	N	Y	N	lawn	Y	N	N	N	0	0	0	1		0	0	100	0	0	0	0	0	0	0	0	0	0	0	0	0	3	185
MF25A	7	Y	H	L	MF25A-4	clumped	N	Y	20	bettongs	Y	13	S	MF25A-4-S	open	N	N	Y	N	bare	N	N	N	Y	0	0	0	0		0	10	40	0	50	0	0	0	0	0	0	0	0	0	0	0	3	185
MF27A	12	Y	L	L	MF27A-1	none	N	N	0	bettongs	Y	14	TL	MF27A-1-TL	tree	N	N	N	Y	lawn	Y	N	N	N	1	0	0	0	YB	0	5	95	0	0	0	0	0	3	2	2	0	0	0	2	0	2	172
MF27A	12	Y	L	L	MF27A-1	none	N	N	0	bettongs	Y	14	TS	MF27A-1-TS	tree	N	N	N	Y	litter	N	N	Y	N	1	0	0	1	YB	0	70	30	0	0	0	0	0	0	0	0	0	0	0	0	0	2	172
MF27A	12	Y	L	L	MF27A-1	none	N	N	0	bettongs	Y	14	OLL	MF27A-1-OLL	log	Y	N	N	N	lawn	Y	N	N	N	0	0	0	0		5	0	95	0	0	0	0	0	0	0	0	0	0	0	0	0	2	172
MF27A	12	Y	L	L	MF27A-1	none	N	N	0	bettongs	Y	14	OL	MF27A-1-OL	open	N	N	Y	N	lawn	Y	N	N	N	0	0	0	0		0	0	100	0	0	0	0	0	1	0	0	0	0	0	0	0	2	172
MF27A	12	Y	L	L	MF27A-1	none	N	N	0	bettongs	Y	14	S	MF27A-1-S	open	N	N	Y	N	bare	N	N	N	Y	0	0	0	0		0	0	90	0	10	0	0	0	0	0	0	0	0	0	0	0	2	172
MF27A	12	Y	L	L	MF27A-3	clumped	N	Y	20	bettongs	Y	14	TL	MF27A-3-TL	tree	N	N	N	Y	lawn	Y	N	N	N	1	0	0	0	YB	5	0	95	0	0	0	0	0	4	1	4	0	4	0	0	0	1	137
MF27A	12	Y	L	L	MF27A-3	clumped	N	Y	20	bettongs	Y	14	TS	MF27A-3-TS	tree	N	N	N	Y	litter	N	N	Y	N	1	0	0	0		0	70	0	0	0	0	0	30	1	1	2	0	2	0	0	0	1	137
MF27A	12	Y	L	L	MF27A-3	clumped	N	Y	20	bettongs	Y	14	OLL	MF27A-3-OLL	log	Y	N	N	N	lawn	Y	N	N	N	0	0	0	0		5	0	95	0	0	0	0	0	0	0	0	0	0	0	0	0	1	137
MF27A	12	Y	L	L	MF27A-3	clumped	N	Y	20	bettongs	Y	14	CLL	MF27A-3-CLL	log	N	Y	N	N	lawn	Y	N	N	N	0	0	1	0		20	0	80	0	0	0	0	0	1	0	0	0	0	0	0	0	1	137
MF27A	12	Y	L	L	MF27A-3	clumped	N	Y	20	bettongs	Y	14	OL	MF27A-3-OL	open	N	N	Y	N	lawn	Y	N	N	N	0	0	1	0		0	0	100	0	0	0	0	0	1	1	0	0	0	0	0	0	1	137
MF27A	12	Y	L	L	MF27A-3	clumped	N	Y	20	bettongs	Y	14	S	MF27A-3-S	open	N	N	Y	N	bare	N	N	N	Y	0	0	0	0		0	0	20	0	80	0	0	0	0	0	0	0	0	0	0	0	1	137
MF27A	12	Y	L	L	MF27A-4	both	Y	Y	40	exclusion	N	13	TL	MF27A-4-TL	tree	N	N	N	Y	lawn	Y	N	N	N	1	0	0	1	YB	0	10	90	0	0	0	0	0	1	1	0	0	0	0	0	0	2	161
MF27A	12	Y	L	L	MF27A-4	both	Y	Y	40	exclusion	N	13	TS	MF27A-4-TS	tree	N	N	N	Y	litter	N	N	Y	N	1	0	0	1	YB	0	50	50	0	0	0	0	0	3	1	2	0	2	0	0	0	2	161
MF27A	12	Y	L	L	MF27A-4	both	Y	Y	40	exclusion	N	13	OLL	MF27A-4-OLL	log	Y	N	N	N	lawn	Y	N	N	N	0	0	0	0		5	5	90	0	0	0	0	0	3	2	1	0	1	0	0	0	2	161
MF27A	12	Y	L	L	MF27A-4	both	Y	Y	40	exclusion	N	13	DLL	MF27A-4-DLL	log	N	Y	N	N	lawn	Y	N	N	N	0	0	0	0		10	5	85	0	0	0	0	0	0	0	0	0	0	0	0	0	2	161
MF27A	12	Y	L	L	MF27A-4	both	Y	Y	40	exclusion	N	13	CLL	MF27A-4-CLL	log	N	Y	N	N	lawn	Y	N	N	N	0	0	0	0		30	0	70	0	0	0	0	0	0	0	0	0	0	0	0	0	2	161
MF27A	12	Y	L	L	MF27A-4	both	Y	Y	40	exclusion	N	13	OL	MF27A-4-OL	open	N	N	Y	N	lawn	Y	N	N	N	0	0	0	0		0	0	100	0	0	0	0	0	0	0	0	0	0	0	0	0	2	161
MF27A	12	Y	L	L	MF27A-4	both	Y	Y	40	exclusion	N	13	S	MF27A-4-S	open	N	N	Y	N	bare	N	N	N	Y	0	0	0	0		0	0	30	0	70	0	0	0	0	0	0	0	0	0	0	0	2	161
MF32	12	Y	L	L	MF32-1	dispersed	Y	N	20	bettongs	Y	14	TL	MF32-1-TL	tree	N	N	N	Y	lawn	Y	N	N	N	1	0	0	0	YB	0	10	90	0	0	0	0	0	6	1	3	0	1	0	2	0	3	178
MF32	12	Y	L	L	MF32-1	dispersed	Y	N	20	bettongs	Y	14	TS	MF32-1-TS	tree	N	N	N	Y	litter	N	N	Y	N	1	1	0	0	YB	0	80	20	0	0	0	0	0	20	7	2	2	0	0	0	0	3	178
MF32	12	Y	L	L	MF32-1	dispersed	Y	N	20	bettongs	Y	14	OLL	MF32-1-OLL	log	Y	N	N	N	lawn	Y	N	N	N	0	0	0	0		5	0	95	0	0	0	0	0	3	2	0	0	0	0	0	0	3	178
MF32	12	Y	L	L	MF32-1	dispersed	Y	N	20	bettongs	Y	14	DLL	MF32-1-DLL	log	N	Y	N	N	lawn	Y	N	N	N	0	0	0	0		10	0	90	0	0	0	0	0	1	1	1	0	0	1	0	0	3	178
MF32	12	Y	L	L	MF32-1	dispersed	Y	N	20	bettongs	Y	14	OL	MF32-1-OL	open	N	N	Y	N	lawn	Y	N	N	N	0	0	0	0		0	0	100	0	0	0	0	0	6	4	0	0	0	0	0	0	3	178
MF32	12	Y	L	L	MF32-1	dispersed	Y	N	20	bettongs	Y	14	S	MF32-1-S	open	N	N	Y	N	bare	N	N	N	Y	0	0	0	0		0	0	20	0	80	0	0	0	4	4	1	0	0	0	1	0	3	178
MF32	12	Y	L	L	MF32-3	both	Y	Y	40	bettongs	Y	14	TL	MF32-3-TL	tree	N	N	N	Y	lawn	Y	N	N	N	1	0	1	0	BRG	0	0	100	0	0	0	0	0	3	3	0	0	0	0	0	0	3	185
MF32	12	Y	L	L	MF32-3	both	Y	Y	40	bettongs	Y	14	TS	MF32-3-TS	tree	N	N	N	Y	litter	N	N	Y	N	1	0	0	0	BRG	0	50	50	0	0	0	0	0	16	11	1	1	0	0	0	0	3	185
MF32	12	Y	L	L	MF32-3	both	Y	Y	40	bettongs	Y	14	OLL	MF32-3-OLL	log	Y	N	N	N	lawn	Y	N	N	N	0	0	2	0		5	0	95	0	0	0	0	0	3	2	0	0	0	0	0	0	3	185
MF32	12	Y	L	L	MF32-3	both	Y	Y	40	bettongs	Y	14	DLL	MF32-3-DLL	log	N	Y	N	N	lawn	Y	N	N	N	0	0	3	0		10	0	90	0	0	0	0	0	1	0	2	0	1	1	0	0	3	185
MF32	12	Y	L	L	MF32-3	both	Y	Y	40	bettongs	Y	14	CLL	MF32-3-CLL	log	N	Y	N	N	lawn	Y	N	N	N	0	0	1	0		30	0	65	0	5	0	0	0	33	30	7	4	1	2	0	0	3	185
MF32	12	Y	L	L	MF32-3	both	Y	Y	40	bettongs	Y	14	OL	MF32-3-OL	open	N	N	Y	N	lawn	Y	N	N	N	0	0	0	0		0	0	100	0	0	0	0	0	6	4	0	0	0	0	0	0	3	185
MF32	12	Y	L	L	MF32-3	both	Y	Y	40	bettongs	Y	14	S	MF32-3-S	open	N	N	Y	N	bare	N	N	N	Y	0	0	0	0		0	0	40	0	60	0	0	0	36	31	5	3	0	1	1	0	3	185
MF32	12	Y	L	L	MF32-4	none	N	N	0	bettongs	Y	14	TT	MF32-4-TT	tree	N	N	N	Y	tussock	N	Y	N	N	1	0	0	0	YB	0	40	20	40	0	0	0	0	48	7	4	2	2	0	0	0	3	195
MF32	12	Y	L	L	MF32-4	none	N	N	0	bettongs	Y	14	TL	MF32-4-TL	tree	N	N	N	Y	lawn	Y	N	N	N	2	0	1	0	BRG	0	0	100	0	0	0	0	0	0	0	0	0	0	0	0	0	3	195
MF32	12	Y	L	L	MF32-4	none	N	N	0	bettongs	Y	14	TS	MF32-4-TS	tree	N	N	N	Y	litter	N	N	Y	N	1	0	0	1	YB	0	98	0	2	0	0	0	0	1	0	1	1	0	0	0	0	3	195
MF32	12	Y	L	L	MF32-4	none	N	N	0	bettongs	Y	14	OLT	MF32-4-OLT	log	Y	N	N	N	tussock	N	Y	N	N	0	0	0	2		5	20	60	5	0	10	0	0	10	4	0	0	0	0	0	0	3	195
MF32	12	Y	L	L	MF32-4	none	N	N	0	bettongs	Y	14	OLL	MF32-4-OLL	log	Y	N	N	N	lawn	Y	N	N	N	0	0	0	0		15	10	65	0	0	0	0	10	31	6	0	0	0	0	0	0	3	195
MF32	12	Y	L	L	MF32-4	none	N	N	0	bettongs	Y	14	OT	MF32-4-OT	open	N	N	Y	N	tussock	N	Y	N	N	0	0	0	16		0	60	10	15	0	15	0	0	7	2	0	0	0	0	0	0	3	195
MF32	12	Y	L	L	MF32-4	none	N	N	0	bettongs	Y	14	OL	MF32-4-OL	open	N	N	Y	N	lawn	Y	N	N	N	0	0	0	6		0	0	65	0	30	5	0	0	14	2	0	0	0	0	0	0	3	195
MF32	12	Y	L	L	MF32-4	none	N	N	0	bettongs	Y	14	S	MF32-4-S	open	N	N	Y	N	bare	N	N	N	Y	0	0	0	10		0	10	0	0	80	10	0	0	3	0	0	0	0	0	0	0	3	195
MF34	8	N	L	L	MF34-1	clumped	N	Y	20	bettongs	Y	14	TT	MF34-1-TT	tree	N	N	N	Y	tussock	N	Y	N	N	1	1	1	0	YB	0	0	90	10	0	0	0	0	0	0	0	0	0	0	0	0	2	157
MF34	8	N	L	L	MF34-1	clumped	N	Y	20	bettongs	Y	14	TL	MF34-1-TL	tree	N	N	N	Y	lawn	Y	N	N	N	2	0	0	0	BRG	0	30	65	0	5	0	0	0	4	3	0	0	0	0	0	0	2	157
MF34	8	N	L	L	MF34-1	clumped	N	Y	20	bettongs	Y	14	TS	MF34-1-TS	tree	N	N	N	Y	litter	N	N	Y	N	1	1	0	0	YB	0	50	45	5	0	0	0	0	0	0	1	0	0	0	1	0	2	157
MF34	8	N	L	L	MF34-1	clumped	N	Y	20	bettongs	Y	14	OLT	MF34-1-OLT	log	Y	N	N	N	tussock	N	Y	N	N	1	0	7	0		10	0	70	20	0	0	0	0	0	0	0	0	0	0	0	0	2	157
MF34	8	N	L	L	MF34-1	clumped	N	Y	20	bettongs	Y	14	OLL	MF34-1-OLL	log	Y	N	N	N	lawn	Y	N	N	N	0	0	0	0		10	0	90	0	0	0	0	0	2	1	2	0	0	1	1	0	2	157
MF34	8	N	L	L	MF34-1	clumped	N	Y	20	bettongs	Y	14	CLL	MF34-1-CLL	log	N	Y	N	N	lawn	Y	N	N	N	0	0	0	0		20	0	80	0	0	0	0	0	0	0	1	0	1	0	0	0	2	157
MF34	8	N	L	L	MF34-1	clumped	N	Y	20	bettongs	Y	14	OT	MF34-1-OT	open	N	N	Y	N	tussock	N	Y	N	N	0	0	0	0		0	0	60	40	0	0	0	0	13	11	1	0	0	0	1	0	2	157
MF34	8	N	L	L	MF34-1	clumped	N	Y	20	bettongs	Y	14	OL	MF34-1-OL	open	N	N	Y	N	lawn	Y	N	N	N	0	0	0	0		0	20	80	0	0	0	0	0	1	1	1	0	0	0	1	0	2	157
MF34	8	N	L	L	MF34-1	clumped	N	Y	20	bettongs	Y	14	S	MF34-1-S	open	N	N	Y	N	bare	N	N	N	Y	0	0	0	0		0	0	40	0	60	0	0	0	0	0	0	0	0	0	0	0	2	157
MF34	8	N	L	L	MF34-2	none	N	N	0	exclusion	N	15	TL	MF34-2-TL	tree	N	N	N	Y	lawn	Y	N	N	N	1	0	0	0	BRG	10	5	85	0	0	0	0	0	0	0	0	0	0	0	0	0	2	166
MF34	8	N	L	L	MF34-2	none	N	N	0	exclusion	N	15	TS	MF34-2-TS	tree	N	N	N	Y	litter	N	N	Y	N	1	0	0	0	YB	0	20	80	0	0	0	0	0	0	0	0	0	0	0	0	0	2	166
MF34	8	N	L	L	MF34-2	none	N	N	0	exclusion	N	15	OLL	MF34-2-OLL	log	Y	N	N	N	lawn	Y	N	N	N	0	0	0	0		5	0	95	0	0	0	0	0	2	1	0	0	0	0	0	0	2	166
MF34	8	N	L	L	MF34-2	none	N	N	0	exclusion	N	15	OL	MF34-2-OL	open	N	N	Y	N	lawn	Y	N	N	N	0	0	1	0		0	0	100	0	0	0	0	0	0	0	1	0	1	0	0	0	2	166
MF34	8	N	L	L	MF34-2	none	N	N	0	exclusion	N	15	S	MF34-2-S	open	N	N	Y	N	bare	N	N	N	Y	0	0	0	0		0	0	30	0	70	0	0	0	9	6	3	0	3	0	0	0	2	166
MF34	8	N	L	L	MF34-3	dispersed	Y	N	20	bettongs	Y	14	TL	MF34-3-TL	tree	N	N	N	Y	lawn	Y	N	N	N	2	0	0	0	BRG	5	0	95	0	0	0	0	0	0	0	0	0	0	0	0	0	2	172
MF34	8	N	L	L	MF34-3	dispersed	Y	N	20	bettongs	Y	14	TS	MF34-3-TS	tree	N	N	N	Y	litter	N	N	Y	N	1	0	0	0	YB	0	60	40	0	0	0	0	0	6	3	3	0	3	0	0	0	2	172
MF34	8	N	L	L	MF34-3	dispersed	Y	N	20	bettongs	Y	14	OLL	MF34-3-OLL	log	Y	N	N	N	lawn	Y	N	N	N	0	0	0	0		10	0	90	0	0	0	0	0	3	0	1	0	1	0	0	0	2	172
MF34	8	N	L	L	MF34-3	dispersed	Y	N	20	bettongs	Y	14	DLL	MF34-3-DLL	log	N	Y	N	N	lawn	Y	N	N	N	0	1	0	0		10	0	90	0	0	0	0	0	0	0	1	1	0	0	0	0	2	172
MF34	8	N	L	L	MF34-3	dispersed	Y	N	20	bettongs	Y	14	OL	MF34-3-OL	open	N	N	Y	N	lawn	Y	N	N	N	0	0	0	0		0	0	100	0	0	0	0	0	0	0	0	0	0	0	0	0	2	172
MF34	8	N	L	L	MF34-3	dispersed	Y	N	20	bettongs	Y	14	S	MF34-3-S	open	N	N	Y	N	bare	N	N	N	Y	0	0	0	0		0	0	60	0	40	0	0	0	6	4	0	0	0	0	0	0	2	172
MF34	8	N	L	L	MF34-4	both	Y	Y	40	bettongs	Y	13	TL	MF34-4-TL	tree	N	N	N	Y	lawn	Y	N	N	N	1	0	0	0	BRG	0	10	90	0	0	0	0	0	3	1	4	1	0	3	0	0	2	161
MF34	8	N	L	L	MF34-4	both	Y	Y	40	bettongs	Y	13	TS	MF34-4-TS	tree	N	N	N	Y	litter	N	N	Y	N	1	0	0	0	YB	0	40	60	0	0	0	0	0	12	4	7	0	7	0	0	0	2	161
MF34	8	N	L	L	MF34-4	both	Y	Y	40	bettongs	Y	13	OLL	MF34-4-OLL	log	Y	N	N	N	lawn	Y	N	N	N	0	0	1	0		10	0	90	0	0	0	0	0	10	10	0	0	0	0	0	0	2	161
MF34	8	N	L	L	MF34-4	both	Y	Y	40	bettongs	Y	13	DLL	MF34-4-DLL	log	N	Y	N	N	lawn	Y	N	N	N	0	0	0	0		10	0	90	0	0	0	0	0	0	0	0	0	0	0	0	0	2	161
MF34	8	N	L	L	MF34-4	both	Y	Y	40	bettongs	Y	13	CLL	MF34-4-CLL	log	N	Y	N	N	lawn	Y	N	N	N	0	0	0	0		30	0	70	0	0	0	0	0	3	3	0	0	0	0	0	0	2	161
MF34	8	N	L	L	MF34-4	both	Y	Y	40	bettongs	Y	13	OL	MF34-4-OL	open	N	N	Y	N	lawn	Y	N	N	N	0	0	0	0		0	0	100	0	0	0	0	0	3	2	0	0	0	0	0	0	2	161
MF34	8	N	L	L	MF34-4	both	Y	Y	40	bettongs	Y	13	S	MF34-4-S	open	N	N	Y	N	bare	N	N	N	Y	0	0	0	0		0	10	10	80	0	0	0	0	2	2	0	0	0	0	0	0	2	161
MF37	10	Y	L	L	MF37-1	none	N	N	0	bettongs	Y	14	TT	MF37-1-TT	tree	N	N	N	Y	tussock	N	Y	N	N	1	0	0	0	BRG	0	20	10	70	0	0	0	0	2	2	0	0	0	0	0	0	3	179
MF37	10	Y	L	L	MF37-1	none	N	N	0	bettongs	Y	14	TL	MF37-1-TL	tree	N	N	N	Y	lawn	Y	N	N	N	2	1	0	1	BRG	0	0	95	0	0	5	0	0	5	1	2	1	0	0	1	0	3	179
MF37	10	Y	L	L	MF37-1	none	N	N	0	bettongs	Y	14	OLL	MF37-1-OLL	log	Y	N	N	N	lawn	Y	N	N	N	0	0	0	2		5	0	95	0	0	0	0	0	1	0	1	0	1	0	0	0	3	179
MF37	10	Y	L	L	MF37-1	none	N	N	0	bettongs	Y	14	OL	MF37-1-OL	open	N	N	Y	N	lawn	Y	N	N	N	0	0	0	0		0	0	100	0	0	0	0	0	1	0	1	1	0	0	0	0	3	179
MF37	10	Y	L	L	MF37-1	none	N	N	0	bettongs	Y	14	S	MF37-1-S	open	N	N	Y	N	bare	N	N	N	Y	0	0	0	0		0	0	50	0	50	0	0	0	3	2	0	0	0	0	0	0	3	179
MF37	10	Y	L	L	MF37-2	dispersed	Y	N	20	bettongs	Y	14	TT	MF37-2-TT	tree	N	N	N	Y	tussock	N	Y	N	N	1	0	0	0	YB	0	50	0	50	0	0	0	0	5	2	0	0	0	0	0	0	2	153
MF37	10	Y	L	L	MF37-2	dispersed	Y	N	20	bettongs	Y	14	TL	MF37-2-TL	tree	N	N	N	Y	lawn	Y	N	N	N	1	0	0	0		0	10	90	0	0	0	0	0	1	0	1	0	0	1	0	0	2	153
MF37	10	Y	L	L	MF37-2	dispersed	Y	N	20	bettongs	Y	14	TS	MF37-2-TS	tree	N	N	N	Y	litter	N	N	Y	N	3	0	0	4		0	80	0	10	0	10	0	0	4	0	3	0	0	0	3	0	2	153
MF37	10	Y	L	L	MF37-2	dispersed	Y	N	20	bettongs	Y	14	OLT	MF37-2-OLT	log	Y	N	N	N	tussock	N	Y	N	N	2	0	0	2		5	75	0	20	0	0	0	0	9	3	0	0	0	0	0	0	2	153
MF37	10	Y	L	L	MF37-2	dispersed	Y	N	20	bettongs	Y	14	OLL	MF37-2-OLL	log	Y	N	N	N	lawn	Y	N	N	N	0	0	0	2		5	70	25	0	0	0	0	0	11	7	2	1	0	0	1	0	2	153
MF37	10	Y	L	L	MF37-2	dispersed	Y	N	20	bettongs	Y	14	DLT	MF37-2-DLT	log	N	Y	N	N	tussock	N	Y	N	N	0	1	1	0		10	30	0	60	0	0	0	0	1	1	2	0	2	0	0	0	2	153
MF37	10	Y	L	L	MF37-2	dispersed	Y	N	20	bettongs	Y	14	DLL	MF37-2-DLL	log	N	Y	N	N	lawn	Y	N	N	N	0	0	0	4		20	75	2	0	0	3	0	0	1	0	1	0	0	0	0	1	2	153
MF37	10	Y	L	L	MF37-2	dispersed	Y	N	20	bettongs	Y	14	OT	MF37-2-OT	open	N	N	Y	N	tussock	N	Y	N	N	0	0	1	8		0	20	0	30	50	0	0	0	2	2	0	0	0	0	0	0	2	153
MF37	10	Y	L	L	MF37-2	dispersed	Y	N	20	bettongs	Y	14	OL	MF37-2-OL	open	N	N	Y	N	lawn	Y	N	N	N	0	0	0	0		0	20	80	0	0	0	0	0	8	4	8	7	1	0	0	0	2	153
MF37	10	Y	L	L	MF37-2	dispersed	Y	N	20	bettongs	Y	14	S	MF37-2-S	open	N	N	Y	N	bare	N	N	N	Y	0	0	1	0		0	5	5	0	90	0	0	0	2	1	0	0	0	0	0	0	2	153
MF37	10	Y	L	L	MF37-3	both	Y	Y	40	exclusion	N	14	TL	MF37-3-TL	tree	N	N	N	Y	lawn	Y	N	N	N	1	0	0	0	YB	0	20	80	0	0	0	0	0	0	0	0	0	0	0	0	0	2	158
MF37	10	Y	L	L	MF37-3	both	Y	Y	40	exclusion	N	14	TS	MF37-3-TS	tree	N	N	N	Y	litter	N	N	Y	N	1	0	0	0	YB	0	90	10	0	0	0	0	0	1	1	0	0	0	0	0	0	2	158
MF37	10	Y	L	L	MF37-3	both	Y	Y	40	exclusion	N	14	OLL	MF37-3-OLL	log	Y	N	N	N	lawn	Y	N	N	N	0	0	0	0		15	65	20	0	0	0	0	0	2	2	0	0	0	0	0	0	2	158
MF37	10	Y	L	L	MF37-3	both	Y	Y	40	exclusion	N	14	DLL	MF37-3-DLL	log	N	Y	N	N	lawn	Y	N	N	N	0	0	0	0		20	0	80	0	0	0	0	0	0	0	0	0	0	0	0	0	2	158
MF37	10	Y	L	L	MF37-3	both	Y	Y	40	exclusion	N	14	CLL	MF37-3-CLL	log	N	Y	N	N	lawn	Y	N	N	N	0	0	1	0		20	50	30	0	0	0	0	0	5	3	0	0	0	0	0	0	2	158
MF37	10	Y	L	L	MF37-3	both	Y	Y	40	exclusion	N	14	OL	MF37-3-OL	open	N	N	Y	N	lawn	Y	N	N	N	0	0	0	0		0	0	100	0	0	0	0	0	1	1	0	0	0	0	0	0	2	158
MF37	10	Y	L	L	MF37-3	both	Y	Y	40	exclusion	N	14	S	MF37-3-S	open	N	N	Y	N	bare	N	N	N	Y	0	0	0	0		0	10	20	0	70	0	0	0	0	0	0	0	0	0	0	0	2	158
MF37	10	Y	L	L	MF37-4	clumped	N	Y	20	bettongs	Y	14	TT	MF37-4-TT	tree	N	N	N	Y	tussock	N	Y	N	N	2	0	2	9		0	40	0	60	0	0	0	0	4	0	2	2	0	0	0	0	1	145
MF37	10	Y	L	L	MF37-4	clumped	N	Y	20	bettongs	Y	14	TL	MF37-4-TL	tree	N	N	N	Y	lawn	Y	N	N	N	1	0	0	0	BRG	0	30	70	0	0	0	0	0	10	6	7	6	0	1	0	0	1	145
MF37	10	Y	L	L	MF37-4	clumped	N	Y	20	bettongs	Y	14	TS	MF37-4-TS	tree	N	N	N	Y	litter	N	N	Y	N	1	0	0	2	BRG	0	50	50	0	0	0	0	0	10	5	5	2	0	0	2	1	1	145
MF37	10	Y	L	L	MF37-4	clumped	N	Y	20	bettongs	Y	14	OLL	MF37-4-OLL	log	Y	N	N	N	lawn	Y	N	N	N	0	0	0	0		10	10	80	0	0	0	0	0	8	5	3	3	0	0	0	0	1	145
MF37	10	Y	L	L	MF37-4	clumped	N	Y	20	bettongs	Y	14	CLL	MF37-4-CLL	log	N	Y	N	N	lawn	Y	N	N	N	0	1	8	0		20	0	80	0	0	0	0	0	4	4	1	0	0	0	1	0	1	145
MF37	10	Y	L	L	MF37-4	clumped	N	Y	20	bettongs	Y	14	OL	MF37-4-OL	open	N	N	Y	N	lawn	Y	N	N	N	0	0	0	0		0	10	90	0	0	0	0	0	0	0	0	0	0	0	0	0	1	145
MF37	10	Y	L	L	MF37-4	clumped	N	Y	20	bettongs	Y	14	S	MF37-4-S	open	N	N	Y	N	bare	N	N	N	Y	0	0	0	0		0	0	0	0	100	0	0	0	0	0	0	0	0	0	0	0	1	145
MF38	10	Y	H	L	MF38-1	dispersed	Y	N	20	bettongs	Y	14	TT	MF38-1-TT	tree	N	N	N	Y	tussock	N	Y	N	N	2	0	0	1	BRG	10	55	20	10	0	5	0	0	9	6	0	0	0	0	0	0	2	161
MF38	10	Y	H	L	MF38-1	dispersed	Y	N	20	bettongs	Y	14	TL	MF38-1-TL	tree	N	N	N	Y	lawn	Y	N	N	N	1	0	0	1	BRG	0	50	50	0	0	0	0	0	4	2	19	8	1	10	0	0	2	161
MF38	10	Y	H	L	MF38-1	dispersed	Y	N	20	bettongs	Y	14	TS	MF38-1-TS	tree	N	N	N	Y	litter	N	N	Y	N	1	0	0	4	E. manifera	0	90	5	0	0	5	0	0	5	2	2	2	0	0	0	0	2	161
MF38	10	Y	H	L	MF38-1	dispersed	Y	N	20	bettongs	Y	14	OLT	MF38-1-OLT	log	Y	N	N	N	tussock	N	Y	N	N	2	1	0	1		5	85	0	5	0	5	0	0	2	1	1	1	0	0	0	0	2	161
MF38	10	Y	H	L	MF38-1	dispersed	Y	N	20	bettongs	Y	14	OLL	MF38-1-OLL	log	Y	N	N	N	lawn	Y	N	N	N	0	0	0	2		15	25	60	0	0	0	0	0	13	10	2	2	0	0	0	0	2	161
MF38	10	Y	H	L	MF38-1	dispersed	Y	N	20	bettongs	Y	14	DLT	MF38-1-DLT	log	N	Y	N	N	tussock	N	Y	N	N	0	0	0	0		15	75	5	5	0	0	0	0	8	6	0	0	0	0	0	0	2	161
MF38	10	Y	H	L	MF38-1	dispersed	Y	N	20	bettongs	Y	14	DLL	MF38-1-DLL	log	N	Y	N	N	lawn	Y	N	N	N	0	0	0	0		10	20	50	0	20	0	0	0	0	0	0	0	0	0	0	0	2	161
MF38	10	Y	H	L	MF38-1	dispersed	Y	N	20	bettongs	Y	14	OT	MF38-1-OT	open	N	N	Y	N	tussock	N	Y	N	N	0	0	0	3		0	85	5	5	0	5	0	0	5	2	0	0	0	0	0	0	2	161
MF38	10	Y	H	L	MF38-1	dispersed	Y	N	20	bettongs	Y	14	OL	MF38-1-OL	open	N	N	Y	N	lawn	Y	N	N	N	0	0	0	0		0	0	100	0	0	0	0	0	2	1	0	0	0	0	0	0	2	161
MF38	10	Y	H	L	MF38-1	dispersed	Y	N	20	bettongs	Y	14	S	MF38-1-S	open	N	N	Y	N	bare	N	N	N	Y	0	0	0	1		0	0	10	0	90	0	0	0	0	0	0	0	0	0	0	0	2	161
MF38	10	Y	H	L	MF38-2	clumped	N	Y	20	exclusion	N	14	TL	MF38-2-TL	tree	N	N	N	Y	lawn	Y	N	N	N	2	0	0	1	BRG	0	20	80	0	0	0	0	0	1	0	0	0	0	0	0	0	2	173
MF38	10	Y	H	L	MF38-2	clumped	N	Y	20	exclusion	N	14	TS	MF38-2-TS	tree	N	N	N	Y	litter	N	N	Y	N	1	0	1	7	BRG	0	80	10	0	0	10	0	0	2	2	0	0	0	0	0	0	2	173
MF38	10	Y	H	L	MF38-2	clumped	N	Y	20	exclusion	N	14	OLL	MF38-2-OLL	log	Y	N	N	N	lawn	Y	N	N	N	0	0	0	1		10	20	70	0	0	0	0	0	0	0	0	0	0	0	0	0	2	173
MF38	10	Y	H	L	MF38-2	clumped	N	Y	20	exclusion	N	14	CLL	MF38-2-CLL	log	N	Y	N	N	lawn	Y	N	N	N	0	0	0	0		40	40	20	0	0	0	0	0	8	3	0	0	0	0	0	0	2	173
MF38	10	Y	H	L	MF38-2	clumped	N	Y	20	exclusion	N	14	OL	MF38-2-OL	open	N	N	Y	N	lawn	Y	N	N	N	0	0	0	0		0	10	70	0	20	0	0	0	2	1	0	0	0	0	0	0	2	173
MF38	10	Y	H	L	MF38-2	clumped	N	Y	20	exclusion	N	14	S	MF38-2-S	open	N	N	Y	N	bare	N	N	N	Y	0	0	4	2		0	20	20	0	60	0	0	0	0	0	0	0	0	0	0	0	2	173
MF38	10	Y	H	L	MF38-3	both	Y	Y	40	bettongs	Y	14	TT	MF38-3-TT	tree	N	N	N	Y	tussock	N	Y	N	N	1	0	1	0	BRG	0	85	10	5	0	0	0	0	9	7	5	1	3	0	1	0	1	146
MF38	10	Y	H	L	MF38-3	both	Y	Y	40	bettongs	Y	14	TL	MF38-3-TL	tree	N	N	N	Y	lawn	Y	N	N	N	1	0	0	0	E. goniocalys	0	0	100	0	0	0	0	0	17	10	11	1	0	7	3	0	1	146
MF38	10	Y	H	L	MF38-3	both	Y	Y	40	bettongs	Y	14	TS	MF38-3-TS	tree	N	N	N	Y	litter	N	N	Y	N	1	0	0	0		0	100	0	0	0	0	0	0	6	3	2	2	0	0	0	0	1	146
MF38	10	Y	H	L	MF38-3	both	Y	Y	40	bettongs	Y	14	OLT	MF38-3-OLT	log	Y	N	N	N	tussock	N	Y	N	N	0	0	0	0		20	40	0	20	0	0	0	0	4	2	1	1	0	0	0	0	1	146
MF38	10	Y	H	L	MF38-3	both	Y	Y	40	bettongs	Y	14	OLL	MF38-3-OLL	log	Y	N	N	N	lawn	Y	N	N	N	0	0	0	0		5	35	60	0	0	0	0	0	31	22	3	0	0	0	0	0	1	146
MF38	10	Y	H	L	MF38-3	both	Y	Y	40	bettongs	Y	14	DLT	MF38-3-DLT	log	N	Y	N	N	tussock	N	Y	N	N	0	0	2	7		20	70	0	10	0	0	0	0	9	5	4	3	0	0	1	0	1	146
MF38	10	Y	H	L	MF38-3	both	Y	Y	40	bettongs	Y	14	DLL	MF38-3-DLL	log	N	Y	N	N	lawn	Y	N	N	N	0	0	0	2		10	40	40	0	10	0	0	0	29	17	1	1	0	0	0	0	1	146
MF38	10	Y	H	L	MF38-3	both	Y	Y	40	bettongs	Y	14	CLT	MF38-3-CLT	log	N	Y	N	N	tussock	N	Y	N	N	0	0	2	4		40	55	0	5	0	0	0	0	5	5	0	0	0	0	0	0	1	146
MF38	10	Y	H	L	MF38-3	both	Y	Y	40	bettongs	Y	14	CLL	MF38-3-CLL	log	N	Y	N	N	lawn	Y	N	N	N	0	0	0	1		50	20	30	0	0	0	0	0	8	5	6	6	0	0	0	0	1	146
MF38	10	Y	H	L	MF38-3	both	Y	Y	40	bettongs	Y	14	OT	MF38-3-OT	open	N	N	Y	N	tussock	N	Y	N	N	0	0	0	0		0	0	60	40	0	0	0	0	2	1	0	0	0	0	0	0	1	146
MF38	10	Y	H	L	MF38-3	both	Y	Y	40	bettongs	Y	14	OL	MF38-3-OL	open	N	N	Y	N	lawn	Y	N	N	N	0	0	1	1		0	70	10	5	0	0	5	10	7	5	2	0	0	0	2	0	1	146
MF38	10	Y	H	L	MF38-3	both	Y	Y	40	bettongs	Y	14	S	MF38-3-S	open	N	N	Y	N	bare	N	N	N	Y	0	0	0	1		0	10	20	0	70	0	0	0	0	0	1	0	0	0	1	0	1	146
MF38	10	Y	H	L	MF38-4	none	N	N	0	bettongs	Y	14	TT	MF38-4-TT	tree	N	N	N	Y	tussock	N	Y	N	N	1	0	0	2		0	35	35	30	0	0	0	0	2	2	0	0	0	0	0	0	1	126
MF38	10	Y	H	L	MF38-4	none	N	N	0	bettongs	Y	14	TL	MF38-4-TL	tree	N	N	N	Y	lawn	Y	N	N	N	1	0	0	0		0	40	60	0	0	0	0	0	8	4	15	15	0	0	0	0	1	126
MF38	10	Y	H	L	MF38-4	none	N	N	0	bettongs	Y	14	TS	MF38-4-TS	tree	N	N	N	Y	litter	N	N	Y	N	0	0	0	1	BRG	0	90	5	0	5	0	0	0	0	0	2	2	0	0	0	0	1	126
MF38	10	Y	H	L	MF38-4	none	N	N	0	bettongs	Y	14	OLL	MF38-4-OLL	log	Y	N	N	N	lawn	Y	N	N	N	0	0	0	0		10	0	40	0	30	0	0	0	2	1	0	0	0	0	0	0	1	126
MF38	10	Y	H	L	MF38-4	none	N	N	0	bettongs	Y	14	OT	MF38-4-OT	open	N	N	Y	N	tussock	N	Y	N	N	0	0	0	1		0	40	40	20	0	0	0	0	11	7	2	2	0	0	0	0	1	126
MF38	10	Y	H	L	MF38-4	none	N	N	0	bettongs	Y	14	OL	MF38-4-OL	open	N	N	Y	N	lawn	Y	N	N	N	0	0	0	2		0	0	30	0	70	0	0	0	25	22	6	6	0	0	0	0	1	126
MF38	10	Y	H	L	MF38-4	none	N	N	0	bettongs	Y	14	S	MF38-4-S	open	N	N	Y	N	bare	N	N	N	Y	0	0	0	0		0	20	20	0	60	0	0	0	0	0	1	1	0	0	0	0	1	126
